# Supplementary material
Source: publisher figshare collection journal article supplement (https://gsajournals.figshare.com/articles/dataset/_/14489004)
Supplement: Supplementary file 1 [file 1]

## Sheet: MhumberiESALQ1638
Query	Number of HSPs	Lowest E-value	Accession (E-value)	Description (E-value)	Greatest identity %
MHUMG1_49401	257	0	E9EYM7#PHI:5427#Mero-Hog1#568076#Metarhizium_robertsii#reduced_virulence	No definition line	100
MHUMG1_51701	32	0	I1RWG5#PHI:1448__PHI:2430#GzGATA006__areA#5518#Fusarium_graminearum#unaffected_pathogenicity__reduced_virulence	No definition line	100
MHUMG1_54561	262	0	E9EU30#PHI:5433#Mero-Ste11#568076#Metarhizium_robertsii#unaffected_pathogenicity	No definition line	100
MHUMG1_59421	5	0	E9F1A7#PHI:6380#mrLPAAT1#568076#Metarhizium_robertsii#reduced_virulence	No definition line	100
MHUMG1_60891	253	0	E9F0W4#PHI:5432#Mero-Mkk1/2#568076#Metarhizium_robertsii#reduced_virulence	No definition line	100
MHUMG1_66361	253	0	E9EWM2#PHI:5430#Mero-Ste7#568076#Metarhizium_robertsii#reduced_virulence	No definition line	100
MHUMG1_53171	31	1.56601e-97	Q9UWF0#PHI:2108#CAM#318829#Magnaporthe_oryzae#reduced_virulence__loss_of_pathogenicity	No definition line	100
MHUMG1_17371	256	0	E9EZF4#PHI:5429#Mero-Ime2#568076#Metarhizium_robertsii#unaffected_pathogenicity	No definition line	99.8674
MHUMG1_70951	85	0	E9F4P0#PHI:3069#MrAC#568076#Metarhizium_robertsii#reduced_virulence	No definition line	99.8155
MHUMG1_5071	6	0	E9EQM1#PHI:3817#mrGAT#568076#Metarhizium_robertsii#reduced_virulence	No definition line	99.7389
MHUMG1_33011	257	0	E9EX34#PHI:5434#Mero-Bck1#568076#Metarhizium_robertsii#reduced_virulence	No definition line	99.6993
MHUMG1_59601	154	0	E9F189#PHI:4125#MrpacC#568076#Metarhizium_robertsii#reduced_virulence	No definition line	99.6377
MHUMG1_15381	9	0	E9EMQ0#PHI:3328#MrKu70#568076#Metarhizium_robertsii#unaffected_pathogenicity	No definition line	99.5356
MHUMG1_47181	4	0	E9F2M8#PHI:7757#Mrpem_(MAA_06426)#568076#Metarhizium_robertsii#unaffected_pathogenicity	No definition line	99.4861
MHUMG1_71711	11	0	E9ETZ6#PHI:7251#Mrtdc#568076#Metarhizium_robertsii#reduced_virulence	No definition line	99.4737
MHUMG1_67781	255	0	E9EW91#PHI:5435#Mero-Ssk2#568076#Metarhizium_robertsii#reduced_virulence	No definition line	99.3353
MHUMG1_20301	229	0	E9F082#PHI:2323#mhk1#568076#Metarhizium_robertsii#reduced_virulence	No definition line	99.0798
MHUMG1_1391	254	0	I1RWQ2#PHI:1235#FGSG_08731#5518#Fusarium_graminearum#lethal	No definition line	98.6376
MHUMG1_24791	6	1.15104e-101	I1S1V9#PHI:1604#GzOB045#5518#Fusarium_graminearum#unaffected_pathogenicity	No definition line	98.6207
MHUMG1_69731	26	0	E9DS54#PHI:8769#MaPpt1#92637#Metarhizium_acridum#unaffected_pathogenicity	No definition line	98.5263
MHUMG1_40521	255	0	E9EJ96#PHI:5431#Mero-Pbs2#568076#Metarhizium_robertsii#reduced_virulence	No definition line	98.4733
MHUMG1_17541	9	0	P53376#PHI:823#beta-tubulin#914237#Rhynchosporium_commune#chemistry_target:_resistance_to_chemical	No definition line	98.4169
MHUMG1_26511	2	1.60532e-159	E9ESA9#PHI:8804#MrSVP_(EFZ01626)#568076#Metarhizium_robertsii#reduced_virulence	No definition line	98.3264
MHUMG1_24721	13	1.62332e-82	A0A0D2Y8P9#PHI:7588#Foatg8#5507#Fusarium_oxysporum#reduced_virulence	No definition line	98.2759
MHUMG1_71781	39	0	Q96VA7#PHI:251#FGA1#5507#Fusarium_oxysporum#reduced_virulence	No definition line	98.2405
MHUMG1_51441	3	1.14377e-84	I1RWI5#PHI:1590#GzOB030#5518#Fusarium_graminearum#lethal	No definition line	97.7941
MHUMG1_69921	35	0	I1RT81#PHI:6410__PHI:6604#FgCdc12__FaCdc12(FGSG_07380)#5518__282267#Fusarium_graminearum__Fusarium_asiaticum#reduced_virulence	No definition line	97.6501
MHUMG1_60721	189	0	E9DSK0#PHI:7629#MaSte12#92637#Metarhizium_acridum#reduced_virulence	No definition line	97.4359
MHUMG1_69811	26	6.81186e-76	G4MNE6#PHI:2109#CNB#318829#Magnaporthe_oryzae#reduced_virulence__loss_of_pathogenicity	No definition line	97.3684
MHUMG1_54201	34	1.21287e-120	G4NC11#PHI:2052#Cdc42#318829#Magnaporthe_oryzae#reduced_virulence	No definition line	96.988
MHUMG1_96771	256	0	E9ESS9#PHI:5428#Mero-Slt2#568076#Metarhizium_robertsii#loss_of_pathogenicity	No definition line	96.9767
MHUMG1_20231	15	0	P29138#PHI:4615#Pr1#5530#Metarhizium_anisopliae#unaffected_pathogenicity	No definition line	96.8992
MHUMG1_1771	82	0	I1RJS2#PHI:1015#GzGPB1#5518#Fusarium_graminearum#reduced_virulence	No definition line	96.8354
MHUMG1_65801	6	0	E9EJG5#PHI:7756#Mrpct_(MAA_00035)#568076#Metarhizium_robertsii#reduced_virulence	No definition line	96.7442
MHUMG1_41591	257	0	I1RAY2#PHI:1218#FGSG_00677#5518#Fusarium_graminearum#lethal	No definition line	96.6767
MHUMG1_104061	44	0	I1RC95#PHI:1566#GzOB006#5518#Fusarium_graminearum#lethal	No definition line	96.6752
MHUMG1_20001	13	0	I1RZP2#PHI:1667#GzCCHC007#5518#Fusarium_graminearum#unaffected_pathogenicity	No definition line	96.6667
MHUMG1_92121	254	0	I1RT36#PHI:1200__PHI:4587#(Gsk3)__Fgk3#5518#Fusarium_graminearum#reduced_virulence__loss_of_pathogenicity	No definition line	96.5699
MHUMG1_5911	6	0	P53376#PHI:823#beta-tubulin#914237#Rhynchosporium_commune#chemistry_target:_resistance_to_chemical	No definition line	96.4824
MHUMG1_66531	271	0	E9E8J3#PHI:3263#MaSnf1#92637#Metarhizium_acridum#reduced_virulence	No definition line	96.0383
MHUMG1_60061	24	0	Q4WJS6#PHI:6753#GlcA#746128#Aspergillus_fumigatus#lethal	No definition line	95.9877
MHUMG1_34111	1	1.26288e-61	Q4HTT1#PHI:1468#GzCCAAT008#5518#Fusarium_graminearum#unaffected_pathogenicity	No definition line	95.7627
MHUMG1_55741	205	0	E9E402#PHI:7114#Crz1#92637#Metarhizium_acridum#reduced_virulence	No definition line	95.7476
MHUMG1_67251	168	1.16369e-73	I1RSD5#PHI:1384#GzC2H047#5518#Fusarium_graminearum#reduced_virulence	No definition line	95.4955
MHUMG1_33831	253	0	E9EWV4#PHI:5426#Mero-Fus3#568076#Metarhizium_robertsii#reduced_virulence	No definition line	95.493
MHUMG1_20821	11	1.94332e-149	I1RRW3#PHI:1658#GzCCCH002#5518#Fusarium_graminearum#unaffected_pathogenicity	No definition line	95.1923
MHUMG1_41641	4	6.41084e-113	I1RAX7#PHI:1563#GzOB003#5518#Fusarium_graminearum#unaffected_pathogenicity	No definition line	95
MHUMG1_69361	8	0	A0A346QRX8#PHI:8782#MaMid1#92637#Metarhizium_acridum#reduced_virulence	No definition line	94.941
MHUMG1_46711	33	3.15649e-132	N4VQQ5#PHI:3280#CoRAS1#5465#Colletotrichum_orbiculare#lethal	No definition line	94.3662
MHUMG1_31461	3	0	I1REF2#PHI:3138#ELP3#5518#Fusarium_graminearum#reduced_virulence	No definition line	94.2857
MHUMG1_60231	260	0	I1RSW5#PHI:1199__PHI:3087#(Sc_Tpk2)__CPK1#5518#Fusarium_graminearum#reduced_virulence__loss_of_pathogenicity	No definition line	93.9759
MHUMG1_99961	16	0	I6PDX4#PHI:7596#MakatG1#92637#Metarhizium_acridum#reduced_virulence__unaffected_pathogenicity	No definition line	93.733
MHUMG1_42901	27	0	Q2PEP0#PHI:576#NoxA#35717#Epichloe_festucae#enhanced_antagonism	No definition line	93.7163
MHUMG1_62061	3	3.25034e-179	I1RS24#PHI:1584#GzOB024#5518#Fusarium_graminearum#unaffected_pathogenicity	No definition line	93.7008
MHUMG1_15361	25	0	I1RMW3#PHI:6408__PHI:6603#FgCdc3__FaCdc3_(FGSG_05315.3)#5518__282267#Fusarium_graminearum__Fusarium_asiaticum#reduced_virulence	No definition line	93.5961
MHUMG1_70591	11	6.5931e-164	J4UI12#PHI:3271#ARSEF_2860#176275#Beauveria_bassiana#reduced_virulence	No definition line	93.5065
MHUMG1_84711	67	2.02692e-59	I1RXZ0#PHI:1467#GzCCAAT007#5518#Fusarium_graminearum#unaffected_pathogenicity	No definition line	93.2039
MHUMG1_23541	22	0	I1RPQ7#PHI:6411#FgCdc10#5518#Fusarium_graminearum#unaffected_pathogenicity	No definition line	93.1548
MHUMG1_38721	255	0	I1RZ37#PHI:1237#FGSG_09660#5518#Fusarium_graminearum#lethal	No definition line	93.0514
MHUMG1_5101	102	0	G4MY65#PHI:7317#Tpc1#318829#Magnaporthe_oryzae#reduced_virulence	No definition line	93.007
MHUMG1_29651	23	0	Q2PEN8#PHI:577#NoxB#35717#Epichloe_festucae#unaffected_pathogenicity	No definition line	93.007
MHUMG1_72181	7	5.81929e-50	I1RNC6#PHI:1465#GzCCAAT005#5518#Fusarium_graminearum#unaffected_pathogenicity	No definition line	92.9412
MHUMG1_16331	28	1.22832e-41	Q5EMY3#PHI:860#MSP1#318829#Magnaporthe_oryzae#reduced_virulence	No definition line	92.8571
MHUMG1_70041	295	0	I1RT69#PHI:1918#GzZC233#5518#Fusarium_graminearum#unaffected_pathogenicity	No definition line	92.6829
MHUMG1_10881	20	0	I1RYH0#PHI:6409#FgCdc11#5518#Fusarium_graminearum#reduced_virulence	No definition line	92.6509
MHUMG1_49371	46	0	Q65YU2#PHI:395#FGA2#5507#Fusarium_oxysporum#loss_of_pathogenicity	No definition line	92.3944
MHUMG1_37501	111	0	G4N3D8#PHI:5622#FZC28#318829#Magnaporthe_oryzae#unaffected_pathogenicity	No definition line	92.3077
MHUMG1_23091	9	1.44629e-178	I1RM09#PHI:2325__PHI:2502__PHI:5724#TEP1__FgTep1p__ScOrtholog_TEP1#5518#Fusarium_graminearum#reduced_virulence	No definition line	92.3077
MHUMG1_38401	3	2.36716e-46	A0N0D1#PHI:2216#PemG1#318829#Magnaporthe_oryzae#effector_(plant_avirulence_determinant)	No definition line	92.3077
MHUMG1_9431	8	0	E9EPV1#PHI:4554#MBZ1#568076#Metarhizium_robertsii#reduced_virulence	No definition line	92.0415
MHUMG1_25301	61	0	Q5YCX0#PHI:336#CHS2#5507#Fusarium_oxysporum#reduced_virulence	No definition line	92.0398
MHUMG1_31541	12	0	I1REC7#PHI:6272#FgHSP90#5518#Fusarium_graminearum#reduced_virulence	No definition line	91.9811
MHUMG1_104201	8	5.01189e-46	I1RC79#PHI:1462#GzCCAAT002#5518#Fusarium_graminearum#reduced_virulence	No definition line	91.6667
MHUMG1_40711	17	4.17732e-102	Q96VL0#PHI:769#CPSOD1#5111#Claviceps_purpurea#unaffected_pathogenicity	No definition line	91.5584
MHUMG1_83781	7	0	Q4U4T0#PHI:2388#Chi2#5530#Metarhizium_anisopliae#increased_virulence_(hypervirulence)__reduced_virulence	No definition line	91.5385
MHUMG1_8131	7	0	Q4WKG5#PHI:2530#TUB1#746128#Aspergillus_fumigatus#lethal__loss_of_pathogenicity	No definition line	91.5367
MHUMG1_23581	7	0	I1S7N4#PHI:2386#ACL1#5518#Fusarium_graminearum#loss_of_pathogenicity	No definition line	91.2195
MHUMG1_48741	24	0	Q6QIY0#PHI:2382#Upa2#5270#Ustilago_maydis#unaffected_pathogenicity	No definition line	90.942
MHUMG1_1191	6	1.04669e-49	Q4IPZ1#PHI:1564#GzOB004#5518#Fusarium_graminearum#unaffected_pathogenicity	No definition line	90.9091
MHUMG1_44181	8	1.15783e-06	I1R9C8#PHI:8668#FgKP4L-3_(FGSG_00062)#5518#Fusarium_graminearum#reduced_virulence	No definition line	90.9091
MHUMG1_12911	8	0	A0A0D2XDM3#PHI:4724#gls1#5507#Fusarium_oxysporum#unaffected_pathogenicity	No definition line	90.5767
MHUMG1_27151	252	0	I1S050#PHI:1203#(Sc_Yck1/2/3)#5518#Fusarium_graminearum#reduced_virulence	No definition line	90.5495
MHUMG1_104161	257	0	Q5K2R7#PHI:393#CpCOT1#5111#Claviceps_purpurea#loss_of_pathogenicity	No definition line	90.5097
MHUMG1_70451	5	0	W7MUL2#PHI:7142#FvStp1#117187#Fusarium_verticillioides#reduced_virulence	No definition line	90.2299
MHUMG1_46231	46	2.15314e-136	Q96VL3#PHI:339#CLPT1#290576#Colletotrichum_lindemuthianum#reduced_virulence	No definition line	90.1478
MHUMG1_47781	5	3.56644e-67	G4MVC5#PHI:6927#MoRAD6#318829#Magnaporthe_oryzae#reduced_virulence	No definition line	90
MHUMG1_66981	12	0	I1RSF7#PHI:1385#GzC2H048#5518#Fusarium_graminearum#unaffected_pathogenicity	No definition line	89.9142
MHUMG1_32031	11	0	J4UUB6#PHI:6972#TpsA#176275#Beauveria_bassiana#reduced_virulence	No definition line	89.881
MHUMG1_22351	95	0	Q4WQK8#PHI:6111#CpcB#746128#Aspergillus_fumigatus#reduced_virulence	No definition line	89.8734
MHUMG1_26951	24	0	G4N4N6#PHI:4616#MoSFA1#318829#Magnaporthe_oryzae#reduced_virulence	No definition line	89.7098
MHUMG1_80521	6	0	I1RA07#PHI:1538__PHI:4209__PHI:4236#GzMyb002__MYT3#5518#Fusarium_graminearum#reduced_virulence	No definition line	89.6552
MHUMG1_49901	10	0	G4N6S1#PHI:8610#gcn5_(MGG_03677)#318829#Magnaporthe_oryzae#reduced_virulence__unaffected_pathogenicity	No definition line	89.2768
MHUMG1_24011	11	0	G4ML75#PHI:4688#MET6#318829#Magnaporthe_oryzae#loss_of_pathogenicity	No definition line	89.1645
MHUMG1_8461	9	0	Q8TGD1#PHI:254#FOW1#5507#Fusarium_oxysporum#reduced_virulence	No definition line	89.0675
MHUMG1_67491	8	0	I1RA52#PHI:445#NOS1#5518#Fusarium_graminearum#reduced_virulence	No definition line	89.0323
MHUMG1_59851	4	0	I1RST1#PHI:1491#GzHMG023#5518#Fusarium_graminearum#lethal	No definition line	88.8462
MHUMG1_17351	31	0	I1RKK5#PHI:1289#FGSG_04416#5518#Fusarium_graminearum#unaffected_pathogenicity	No definition line	88.8383
MHUMG1_53631	253	0	I1RN31#PHI:1223#FGSG_05393#5518#Fusarium_graminearum#lethal	No definition line	88.7879
MHUMG1_11481	20	0	G4N168#PHI:2063__PHI:2110#MCNA__MGG_07456.5#318829#Magnaporthe_oryzae#reduced_virulence__unaffected_pathogenicity	No definition line	88.7189
MHUMG1_67871	12	4.9333e-177	Q4IQT8#PHI:1618#GzFET5#5518#Fusarium_graminearum#unaffected_pathogenicity	No definition line	88.6207
MHUMG1_9391	10	1.5235e-134	I1RD63#PHI:6093#FgVps29#5518#Fusarium_graminearum#reduced_virulence	No definition line	88.5572
MHUMG1_41541	39	2.74573e-131	G4MWX1#PHI:7134#MoRab5B#318829#Magnaporthe_oryzae#reduced_virulence	No definition line	88.5321
MHUMG1_101991	453	0	I1RGD6#PHI:1193#(Sc_Sky1)#5518#Fusarium_graminearum#reduced_virulence	No definition line	88.4692
MHUMG1_20631	7	2.62678e-168	J5K8Q8#PHI:3270#ARSEF_2860#176275#Beauveria_bassiana#reduced_virulence	No definition line	88.4615
MHUMG1_55591	6	2.61623e-48	G4MPJ3#PHI:8038__PHI:8045#Mosmt3__Smt3#318829#Magnaporthe_oryzae#reduced_virulence	No definition line	88.4615
MHUMG1_39631	8	0	W7M5P0#PHI:2916#Ppr2#117187#Fusarium_verticillioides#unaffected_pathogenicity	No definition line	88.3797
MHUMG1_16081	12	0	I1RE46#PHI:1570#GzOB010#5518#Fusarium_graminearum#unaffected_pathogenicity	No definition line	88.3552
MHUMG1_40981	8	1.70744e-72	I1RW90#PHI:1627#GzTF2S002#5518#Fusarium_graminearum#unaffected_pathogenicity	No definition line	88.1818
MHUMG1_28651	28	0	I1REJ1#PHI:1662#GzCCHC002#5518#Fusarium_graminearum#unaffected_pathogenicity	No definition line	88.009
MHUMG1_68971	30	0	I1RTG5#PHI:6245#FaMyo2B#5518#Fusarium_graminearum#reduced_virulence	No definition line	87.9017
MHUMG1_47091	32	5.47576e-48	G4N4Y2#PHI:2176#ASD4#318829#Magnaporthe_oryzae#loss_of_pathogenicity	No definition line	87.7551
MHUMG1_22591	255	0	I1RP88#PHI:1226#FGSG_05845#5518#Fusarium_graminearum#lethal	No definition line	87.7358
MHUMG1_4181	48	0	J4W8U0#PHI:6280#bmiro#176275#Beauveria_bassiana#reduced_virulence	No definition line	87.6997
MHUMG1_29511	3	2.8375e-38	I1S219#PHI:1652#GzWing024#5518#Fusarium_graminearum#unaffected_pathogenicity	No definition line	87.6712
MHUMG1_62221	94	5.6609e-18	A5F6S0#PHI:4108#fadD#666#Vibrio_cholerae#reduced_virulence__unaffected_pathogenicity	No definition line	87.5
MHUMG1_1681	7	2.33515e-111	I1RJT0#PHI:8913#FgVPS2_(FGSG_04112)#5518#Fusarium_graminearum#lethal	No definition line	87.2807
MHUMG1_55851	19	0	J4UEM9#PHI:8044#hos2#176275#Beauveria_bassiana#reduced_virulence	No definition line	87.1227
MHUMG1_23571	6	0	I1RPR1#PHI:2387#ACL2#5518#Fusarium_graminearum#loss_of_pathogenicity	No definition line	87.1166
MHUMG1_32841	258	0	I1RA20#PHI:1244#FGSG_00337#5518#Fusarium_graminearum#unaffected_pathogenicity	No definition line	87.0968
MHUMG1_50041	11	2.04391e-142	I1R9X6#PHI:8908#FgVPS28_(FGSG_00291)#5518#Fusarium_graminearum#reduced_virulence	No definition line	86.9748
MHUMG1_16361	8	0	A0A0D2YC96#PHI:4725#gbe1#5507#Fusarium_oxysporum#unaffected_pathogenicity	No definition line	86.9469
MHUMG1_41941	12	0	G4N6P6#PHI:8695#MoImd4_(MGG_03699)#318829#Magnaporthe_oryzae#reduced_virulence	No definition line	86.8421
MHUMG1_2631	11	0	I1RV69#PHI:1234#FGSG_08133#5518#Fusarium_graminearum#lethal	No definition line	86.7297
MHUMG1_58161	34	1.83485e-113	I1RFZ8#PHI:1663#GzCCHC003#5518#Fusarium_graminearum#unaffected_pathogenicity	No definition line	86.6667
MHUMG1_105601	21	3.3789e-105	W7LLK3#PHI:7143#FvCYP1#117187#Fusarium_verticillioides#reduced_virulence	No definition line	86.6667
MHUMG1_34021	28	9.53232e-65	Q5AG40#PHI:2553#VPS4#5476#Candida_albicans#loss_of_pathogenicity	No definition line	86.6667
MHUMG1_35571	106	4.08882e-14	Q9HWG3#PHI:6938__PHI:6989#pchD#287#Pseudomonas_aeruginosa#reduced_virulence__increased_virulence_(hypervirulence)__loss_of_pathogenicity	No definition line	86.6667
MHUMG1_78441	37	1.89045e-115	G4MYS1#PHI:4736#MoYpt7#318829#Magnaporthe_oryzae#loss_of_pathogenicity	No definition line	86.5979
MHUMG1_27971	32	1.18928e-103	I1S095#PHI:861#RAS2#5518#Fusarium_graminearum#reduced_virulence	No definition line	86.5591
MHUMG1_9951	4	1.87817e-175	G4MQZ2#PHI:2038#Mir1#318829#Magnaporthe_oryzae#unaffected_pathogenicity	No definition line	86.5132
MHUMG1_68101	19	1.587e-105	G4MU60#PHI:6615#Mocapn4#318829#Magnaporthe_oryzae#reduced_virulence	No definition line	86.4706
MHUMG1_61791	270	0	B0B5Z9#PHI:1037#Cla4#5111#Claviceps_purpurea#loss_of_pathogenicity	No definition line	86.3469
MHUMG1_48291	106	0	I1RQ34#PHI:1377#GzC2H040#5518#Fusarium_graminearum#unaffected_pathogenicity	No definition line	86.3014
MHUMG1_67881	4	0	G4NCL5#PHI:877#MGG_00383#318829#Magnaporthe_oryzae#reduced_virulence	No definition line	86.1893
MHUMG1_65911	11	0	I1S0N5#PHI:1552#GzMyb016#5518#Fusarium_graminearum#unaffected_pathogenicity	No definition line	85.7939
MHUMG1_46021	18	0	I1RQ89#PHI:1641__PHI:2434#FgFlbA#5518#Fusarium_graminearum#reduced_virulence	No definition line	85.7438
MHUMG1_50891	9	2.30536e-99	W7LTW0#PHI:3355__PHI:4514#Mads1__Fvmcm1#117187#Fusarium_verticillioides#unaffected_pathogenicity__reduced_virulence	No definition line	85.7143
MHUMG1_61341	6	1.4463e-94	I1RRN6#PHI:1547#GzMyb011#5518#Fusarium_graminearum#unaffected_pathogenicity	No definition line	85.7143
MHUMG1_102671	25	0	I1V1W1#PHI:6207#BbCyp6#176275#Beauveria_bassiana#reduced_virulence	No definition line	85.468
MHUMG1_15971	11	0	I1RE58#PHI:443#CBL1#5518#Fusarium_graminearum#reduced_virulence	No definition line	85.3933
MHUMG1_86821	12	0	G4N8A1#PHI:2087#Moatg26#318829#Magnaporthe_oryzae#unaffected_pathogenicity	No definition line	85.2459
MHUMG1_51691	254	0	I1RWG6#PHI:1187#(Sc_Dbf2/Dbf20)#5518#Fusarium_graminearum#reduced_virulence	No definition line	84.8802
MHUMG1_42011	13	0	J5K974#PHI:6470#Trr1#176275#Beauveria_bassiana#unaffected_pathogenicity	No definition line	84.8101
MHUMG1_19271	4	0	I1RZZ3#PHI:2728#FgERG4#5518#Fusarium_graminearum#reduced_virulence	No definition line	84.7162
MHUMG1_9531	247	0	I1RD74#PHI:1961#GzZC276#5518#Fusarium_graminearum#unaffected_pathogenicity	No definition line	84.6154
MHUMG1_29251	35	1.89336e-176	Q5AG40#PHI:2553#VPS4#5476#Candida_albicans#loss_of_pathogenicity	No definition line	84.6154
MHUMG1_24021	5	2.92998e-06	I1S242#PHI:1499#GzHMG031#5518#Fusarium_graminearum#unaffected_pathogenicity	No definition line	84.6154
MHUMG1_57751	18	0	I1RFX8#PHI:1574#GzOB014#5518#Fusarium_graminearum#lethal	No definition line	84.5882
MHUMG1_4401	24	0	Q4WK03#PHI:2544#PAB1#746128#Aspergillus_fumigatus#lethal	No definition line	84.4237
MHUMG1_20211	8	0	F9WWR1#PHI:4966#sdi1#1047171#Zymoseptoria_tritici#unaffected_pathogenicity	No definition line	84.3902
MHUMG1_101151	4	1.08885e-76	I1S1V9#PHI:1604#GzOB045#5518#Fusarium_graminearum#unaffected_pathogenicity	No definition line	84.2857
MHUMG1_15441	31	0	A0A016PX00#PHI:4602#FDB2#5518#Fusarium_graminearum#reduced_virulence	No definition line	84.2837
MHUMG1_19861	114	1.46412e-155	Q4HYC1#PHI:1201#(Bud32)#5518#Fusarium_graminearum#reduced_virulence	No definition line	84.2105
MHUMG1_32681	4	4.63404e-110	Q4IR08#PHI:1608#GzP53L001#5518#Fusarium_graminearum#unaffected_pathogenicity	No definition line	84.186
MHUMG1_15301	151	0	Q0WXM3#PHI:734#FOW2#5507#Fusarium_oxysporum#loss_of_pathogenicity	No definition line	84.1699
MHUMG1_29571	10	2.42529e-128	I1S215#PHI:2400#Fgp2#5518#Fusarium_graminearum#unaffected_pathogenicity	No definition line	84.1584
MHUMG1_56371	4	0	I1RG99#PHI:6091#FgVps35#5518#Fusarium_graminearum#reduced_virulence	No definition line	84.1505
MHUMG1_67591	18	3.43327e-40	Q2Q466#PHI:1063#MNH6#318829#Magnaporthe_oryzae#reduced_virulence	No definition line	84.058
MHUMG1_62431	3	0	I1RC52#PHI:6092#FgVps26#5518#Fusarium_graminearum#reduced_virulence	No definition line	84.0361
MHUMG1_27021	5	0	I1S0H5#PHI:7717#FgOXP1#5518#Fusarium_graminearum#reduced_virulence	No definition line	83.871
MHUMG1_71321	21	0	E9R5E2#PHI:2513#GFA1#746128#Aspergillus_fumigatus#lethal__loss_of_pathogenicity	No definition line	83.8571
MHUMG1_2031	3	0	Q5YCW8#PHI:337#CHS7#5507#Fusarium_oxysporum#reduced_virulence	No definition line	83.8323
MHUMG1_34521	19	0	A0JC82#PHI:578#NoxR#35717#Epichloe_festucae#enhanced_antagonism	No definition line	83.6224
MHUMG1_63861	41	0	I1RBR4#PHI:2908#Cyp51B#5518#Fusarium_graminearum#unaffected_pathogenicity__reduced_virulence	No definition line	83.4601
MHUMG1_40701	6	0	I1RWP4#PHI:1530#Gzsnd#5518#Fusarium_graminearum#unaffected_pathogenicity	No definition line	83.4086
MHUMG1_19461	42	0	I1RZX9#PHI:1014#GzGPA3#5518#Fusarium_graminearum#unaffected_pathogenicity	No definition line	83.3333
MHUMG1_96911	74	2.57499e-143	I1S0W9#PHI:1418#GzC2H085#5518#Fusarium_graminearum#lethal	No definition line	83.3333
MHUMG1_89781	120	2.77814e-101	I1RX94#PHI:1164#RRG1__SSK1#5518#Fusarium_graminearum#reduced_virulence	No definition line	83.2432
MHUMG1_65701	13	9.67624e-91	I1S006#PHI:1650#GzWing022#5518#Fusarium_graminearum#lethal	No definition line	83.1933
MHUMG1_80271	5	1.10326e-172	G4NC97#PHI:3976#MoIlv6#318829#Magnaporthe_oryzae#loss_of_pathogenicity	No definition line	83.1579
MHUMG1_80531	2	0	I1RA06#PHI:6258#DHS#5518#Fusarium_graminearum#increased_virulence_(hypervirulence)__unaffected_pathogenicity	No definition line	83.0946
MHUMG1_47771	21	0	G4MVC4#PHI:5082#MoAcat1#318829#Magnaporthe_oryzae#reduced_virulence	No definition line	83.0882
MHUMG1_89251	13	0	A0A0A2HZI5#PHI:8720#PeImp#27334#Penicillium_expansum#unaffected_pathogenicity	No definition line	83.0827
MHUMG1_49141	9	0	E3QJK7#PHI:6827#GPI8#31870#Colletotrichum_graminicola#loss_of_pathogenicity	No definition line	83.0601
MHUMG1_65441	14	0	I1RAH4#PHI:1562#GzOB002#5518#Fusarium_graminearum#lethal	No definition line	83.0208
MHUMG1_42331	8	0	J5K938#PHI:7057#PilA#176275#Beauveria_bassiana#reduced_virulence	No definition line	83.0028
MHUMG1_20061	15	0	I1RSI4#PHI:1587#GzOB027#5518#Fusarium_graminearum#unaffected_pathogenicity	No definition line	82.9448
MHUMG1_71091	4	8.16482e-102	I1RCB7#PHI:1567#GzOB007#5518#Fusarium_graminearum#unaffected_pathogenicity	No definition line	82.9412
MHUMG1_43941	3	3.1376e-95	I1RFN9#PHI:1656#GzYL#5518#Fusarium_graminearum#lethal	No definition line	82.8685
MHUMG1_59981	56	0	I1RSU2#PHI:724__PHI:730#PKS9__KSA1#5518#Fusarium_graminearum#unaffected_pathogenicity	No definition line	82.8638
MHUMG1_46091	4	1.20249e-171	I1RQ81#PHI:1582#GzOB022#5518#Fusarium_graminearum#unaffected_pathogenicity	No definition line	82.8571
MHUMG1_30521	7	0	I1RNS1#PHI:355#GzmetE#5518#Fusarium_graminearum#reduced_virulence	No definition line	82.8261
MHUMG1_30451	5	0	I1S7F8#PHI:1553#GzMyb017#5518#Fusarium_graminearum#reduced_virulence	No definition line	82.7957
MHUMG1_42611	6	3.20641e-156	Q4IPC8#PHI:1531__PHI:5700#GzSsu72__ScOrtholog_SSU72#5518#Fusarium_graminearum#unaffected_pathogenicity__lethal	No definition line	82.7451
MHUMG1_69211	15	4.25315e-114	J4W023#PHI:7181#cypB#176275#Beauveria_bassiana#reduced_virulence	No definition line	82.6923
MHUMG1_68871	9	0	G4MXS1#PHI:8611#pyruvate_kinase#318829#Magnaporthe_oryzae#unaffected_pathogenicity__reduced_virulence__loss_of_pathogenicity	No definition line	82.6667
MHUMG1_62241	259	3.94017e-101	I1RC69#PHI:1934#GzZC249#5518#Fusarium_graminearum#unaffected_pathogenicity	No definition line	82.6087
MHUMG1_43741	24	0	W7MHG4#PHI:2462#RGSB#117187#Fusarium_verticillioides#unaffected_pathogenicity	No definition line	82.5137
MHUMG1_16951	256	0	I1RKH9#PHI:1177#nrc-2#5518#Fusarium_graminearum#reduced_virulence	No definition line	82.5119
MHUMG1_90681	15	0	Q9C1T0#PHI:200#ARG1#5507#Fusarium_oxysporum#reduced_virulence	No definition line	82.4411
MHUMG1_18761	51	0	J5JJ15#PHI:7154#spf1#176275#Beauveria_bassiana#reduced_virulence	No definition line	82.3976
MHUMG1_103351	8	0	G4N1E7#PHI:6637#Movps1#318829#Magnaporthe_oryzae#lethal	No definition line	82.2095
MHUMG1_34911	450	0	G2XBR1#PHI:3708#VdSSP1#27337#Verticillium_dahliae#reduced_virulence	No definition line	82.1429
MHUMG1_60011	21	1.16771e-38	A0A0U4VHH3#PHI:8637#CspB_(WP_011408744.1)#347#Xanthomonas_oryzae#unaffected_pathogenicity	No definition line	82.0896
MHUMG1_72151	38	3.7455e-121	G4N8I6#PHI:7133#MoRab5A#318829#Magnaporthe_oryzae#reduced_virulence	No definition line	82.0833
MHUMG1_30681	19	0	I1RM25#PHI:1579#GzOB019#5518#Fusarium_graminearum#unaffected_pathogenicity	No definition line	82.0707
MHUMG1_103331	13	2.16775e-65	G4N6S1#PHI:8610#gcn5_(MGG_03677)#318829#Magnaporthe_oryzae#reduced_virulence__unaffected_pathogenicity	No definition line	82
MHUMG1_46281	2	1.65648e-166	Q4X132#PHI:2548#KRR1#746128#Aspergillus_fumigatus#lethal	No definition line	81.9788
MHUMG1_70801	254	0	Q5K2R7#PHI:393#CpCOT1#5111#Claviceps_purpurea#loss_of_pathogenicity	No definition line	81.8697
MHUMG1_77871	40	0	I1RPV7#PHI:1227#FGSG_06089#5518#Fusarium_graminearum#lethal	No definition line	81.8629
MHUMG1_41231	90	0	W7MT31#PHI:3387#FVEG_12523#117187#Fusarium_verticillioides#unaffected_pathogenicity	No definition line	81.8402
MHUMG1_53701	114	0	I1RN37#PHI:1374#GzC2H037#5518#Fusarium_graminearum#unaffected_pathogenicity	No definition line	81.8294
MHUMG1_55621	9	0	Q6B957#PHI:490#FRP1#5507#Fusarium_oxysporum#loss_of_pathogenicity	No definition line	81.8182
MHUMG1_62471	2	0	J4KQD8#PHI:6875#BbVmaH#176275#Beauveria_bassiana#reduced_virulence	No definition line	81.7992
MHUMG1_15931	203	0	A6N6J8#PHI:1021__PHI:2981#CTF1__Ctf1#5507#Fusarium_oxysporum#unaffected_pathogenicity__reduced_virulence	No definition line	81.6918
MHUMG1_11221	185	7.21695e-79	I1RYG0#PHI:1410#GzC2H076#5518#Fusarium_graminearum#unaffected_pathogenicity	No definition line	81.5789
MHUMG1_91911	57	0	Q8TFN6#PHI:1054#CgCHSI#31870#Colletotrichum_graminicola#unaffected_pathogenicity	No definition line	81.4815
MHUMG1_75721	8	0	I1RKY2#PHI:1578#GzOB018#5518#Fusarium_graminearum#unaffected_pathogenicity	No definition line	81.4042
MHUMG1_50921	6	0	Q5J4D6#PHI:365__PHI:2267#MLS1__Mls1#13684#Parastagonospora_nodorum#loss_of_pathogenicity	No definition line	81.3996
MHUMG1_61651	7	5.02366e-88	I1RS54#PHI:1518#GzHOMEL016#5518#Fusarium_graminearum#unaffected_pathogenicity	No definition line	81.3793
MHUMG1_31561	14	0	I1REC4#PHI:6095#FgVps5#5518#Fusarium_graminearum#reduced_virulence	No definition line	81.362
MHUMG1_38741	4	3.8109e-96	I1RZ39#PHI:1599#GzOB039#5518#Fusarium_graminearum#unaffected_pathogenicity	No definition line	81.2834
MHUMG1_43771	254	0	I1RD19#PHI:1251#FGSG_01506#5518#Fusarium_graminearum#unaffected_pathogenicity	No definition line	81.2734
MHUMG1_53581	13	0	J4VW09#PHI:4783__PHI:8631#Fkh2__fkh2#176275#Beauveria_bassiana#reduced_virulence	No definition line	81.25
MHUMG1_66521	17	0	O42622#PHI:123__PHI:775__PHI:794__PHI:7227#PTH9_(NTH1)__MGG_09471__nth1#318829#Magnaporthe_oryzae#reduced_virulence	No definition line	81.2383
MHUMG1_55571	13	0	G4N7U4#PHI:6634#MoDnm1#318829#Magnaporthe_oryzae#reduced_virulence	No definition line	81.2039
MHUMG1_66341	5	0	Q4HYQ4#PHI:1601#GzOB042#5518#Fusarium_graminearum#unaffected_pathogenicity	No definition line	81.1839
MHUMG1_20921	257	0	I1RRX7#PHI:1183#(Sc_Cmk1/Cmk2)#5518#Fusarium_graminearum#reduced_virulence	No definition line	81.155
MHUMG1_20361	6	0	K9Y567#PHI:4506#So_(soft)#35717#Epichloe_festucae#increased_virulence_(hypervirulence)	No definition line	81.1489
MHUMG1_4551	9	4.06387e-169	G4NB53#PHI:5472#MoDeam#318829#Magnaporthe_oryzae#reduced_virulence	No definition line	81.1189
MHUMG1_19431	4	0	I1RZY1#PHI:1602#GzOB043#5518#Fusarium_graminearum#unaffected_pathogenicity	No definition line	81.1111
MHUMG1_105591	2	0	I1RB71#PHI:1630#GzWing002#5518#Fusarium_graminearum#unaffected_pathogenicity	No definition line	81.1024
MHUMG1_43091	253	9.32817e-147	I1S5M8#PHI:1258#FGSG_12149#5518#Fusarium_graminearum#unaffected_pathogenicity	No definition line	81.07
MHUMG1_80231	50	0	Q4X0M4#PHI:2527#SEC31#746128#Aspergillus_fumigatus#lethal__loss_of_pathogenicity	No definition line	80.9524
MHUMG1_67971	7	0	G2WYZ0#PHI:7329#STT3#27337#Verticillium_dahliae#reduced_virulence	No definition line	80.8926
MHUMG1_27181	256	0	I1S053#PHI:1772#GzZC087#5518#Fusarium_graminearum#reduced_virulence	No definition line	80.7692
MHUMG1_12461	4	0	Q2V086#PHI:862#ClaSSD1#5462#Colletotrichum_lagenaria#loss_of_pathogenicity	No definition line	80.6554
MHUMG1_13981	10	0	G4MTG9#PHI:8734#MoLeu1_(MGG_01553)#318829#Magnaporthe_oryzae#loss_of_pathogenicity	No definition line	80.6211
MHUMG1_27951	54	0	Q8TFN5#PHI:1055#CgCHSIII#31870#Colletotrichum_graminicola#unaffected_pathogenicity	No definition line	80.6134
MHUMG1_52731	6	0	I1RX47#PHI:1666#GzCCHC006#5518#Fusarium_graminearum#unaffected_pathogenicity	No definition line	80.5804
MHUMG1_8941	36	0	G4NH84#PHI:8588#Moppe1#318829#Magnaporthe_oryzae#reduced_virulence	No definition line	80.5634
MHUMG1_70271	16	9.88393e-124	Q86ZB5#PHI:7358#KLP7#40559#Botrytis_cinerea#reduced_virulence	No definition line	80.5556
MHUMG1_75841	13	1.60521e-144	G5EH28#PHI:5598#FZC9#318829#Magnaporthe_oryzae#unaffected_pathogenicity	No definition line	80.531
MHUMG1_74701	272	3.47826e-98	I1R9P3#PHI:1995#GzZC310#5518#Fusarium_graminearum#unaffected_pathogenicity	No definition line	80.4878
MHUMG1_70521	52	0	J4VXB0#PHI:7150#eca1#176275#Beauveria_bassiana#reduced_virulence	No definition line	80.462
MHUMG1_43421	19	0	I1RFM6#PHI:744#ADE5#5518#Fusarium_graminearum#reduced_virulence	No definition line	80.4598
MHUMG1_71841	266	2.69602e-175	I1RRB9#PHI:1229#FGSG_06637#5518#Fusarium_graminearum#lethal	No definition line	80.4598
MHUMG1_87141	257	0	I1RUG2#PHI:1233#FGSG_07855#5518#Fusarium_graminearum#lethal	No definition line	80.4455
MHUMG1_1661	15	0	H6ULV1#PHI:5450#gdh2#474922#Colletotrichum_gloeosporioides#reduced_virulence__unaffected_pathogenicity	No definition line	80.4432
MHUMG1_1481	10	0	I1RWA9#PHI:1647#GzWing019#5518#Fusarium_graminearum#reduced_virulence	No definition line	80.3938
MHUMG1_65471	16	0	I1RAH1#PHI:4658#FgHXK1#5518#Fusarium_graminearum#reduced_virulence	No definition line	80.3758
MHUMG1_25221	16	0	I1RFJ2#PHI:1573#GzOB013#5518#Fusarium_graminearum#lethal	No definition line	80.359
MHUMG1_5441	6	0	H9C592#PHI:2590__PHI:2611#CMLE#5507#Fusarium_oxysporum#loss_of_pathogenicity	No definition line	80.2168
MHUMG1_2161	7	1.44764e-56	I1RG68#PHI:1544#GzMyb008#5518#Fusarium_graminearum#unaffected_pathogenicity	No definition line	80.1724
MHUMG1_5841	113	0	I1RYR6#PHI:1692#GzZC007#5518#Fusarium_graminearum#unaffected_pathogenicity	No definition line	80.1527
MHUMG1_25191	8	0	Q4IEV4#PHI:1637#GzWing009#5518#Fusarium_graminearum#lethal	No definition line	80.0797
MHUMG1_62651	11	0	I1RBX1#PHI:5779#Fgsg01064#5518#Fusarium_graminearum#unaffected_pathogenicity	No definition line	80
MHUMG1_71641	266	0	I1RNG8#PHI:1176#(Sc_Atg1)#5518#Fusarium_graminearum#reduced_virulence	No definition line	80
MHUMG1_35271	37	1.08186e-94	I1RC95#PHI:1566#GzOB006#5518#Fusarium_graminearum#lethal	No definition line	80
MHUMG1_29341	33	1.76476e-83	I1RC95#PHI:1566#GzOB006#5518#Fusarium_graminearum#lethal	No definition line	80
MHUMG1_71851	63	1.48498e-65	Q9C1E9#PHI:226#PEX6#5462#Colletotrichum_lagenaria#loss_of_pathogenicity	No definition line	80
MHUMG1_100331	37	2.02524e-31	G4NES9#PHI:784#MGG_00056#318829#Magnaporthe_oryzae#reduced_virulence	No definition line	80
MHUMG1_27861	104	1.58063e-18	Q4WR83#PHI:2321#SidI#746128#Aspergillus_fumigatus#reduced_virulence	No definition line	80
MHUMG1_105471	139	2.95379e-18	G4N853#PHI:5630#FZC35#318829#Magnaporthe_oryzae#unaffected_pathogenicity	No definition line	80
MHUMG1_17681	120	5.94459e-17	I1RKP6#PHI:1926#GzZC241#5518#Fusarium_graminearum#unaffected_pathogenicity	No definition line	80
MHUMG1_49391	6	0	G4MW66#PHI:2062__PHI:3815#Gph1__GPH1#318829#Magnaporthe_oryzae#unaffected_pathogenicity__loss_of_pathogenicity__reduced_virulence	No definition line	79.9552
MHUMG1_64521	15	0	J5K1X2#PHI:7036#Pmt4#176275#Beauveria_bassiana#increased_virulence_(hypervirulence)__reduced_virulence	No definition line	79.9218
MHUMG1_56621	35	1.27573e-94	I1RJP0#PHI:3833#Fgrho2#5518#Fusarium_graminearum#reduced_virulence	No definition line	79.8817
MHUMG1_6691	13	0	I1RY25#PHI:1167#NPC1#5518#Fusarium_graminearum#reduced_virulence	No definition line	79.6326
MHUMG1_69311	253	0	I1RTC2#PHI:1232#FGSG_07423#5518#Fusarium_graminearum#lethal	No definition line	79.6117
MHUMG1_63011	13	0	I1RC07#PHI:1348#GzC2H008#5518#Fusarium_graminearum#reduced_virulence	No definition line	79.597
MHUMG1_35941	2	1.68505e-102	G4MRH1#PHI:7112#MoERR1#318829#Magnaporthe_oryzae#reduced_virulence	No definition line	79.5699
MHUMG1_85361	53	1.81744e-121	A0SXQ6#PHI:1061#MgRho3#318829#Magnaporthe_oryzae#loss_of_pathogenicity	No definition line	79.5349
MHUMG1_43341	5	1.10407e-116	J5JYY9#PHI:4917#BbbqrA#176275#Beauveria_bassiana#reduced_virulence__increased_virulence_(hypervirulence)__unaffected_pathogenicity	No definition line	79.397
MHUMG1_47161	271	0	I1RM85#PHI:1959#GzZC274#5518#Fusarium_graminearum#unaffected_pathogenicity	No definition line	79.3878
MHUMG1_15741	44	0	I1RE80#PHI:3037#FgERG5A#5518#Fusarium_graminearum#reduced_virulence	No definition line	79.3621
MHUMG1_2211	9	0	J5JEX5#PHI:3097#Kre2/Mnt1#176275#Beauveria_bassiana#reduced_virulence	No definition line	79.3241
MHUMG1_15731	13	0	I1RE83#PHI:1288__PHI:6300#FGSG_01963__FgPDK1#5518#Fusarium_graminearum#unaffected_pathogenicity__reduced_virulence	No definition line	79.3103
MHUMG1_61881	20	0	I1RS41#PHI:1529#Gzscp#5518#Fusarium_graminearum#reduced_virulence	No definition line	79.2869
MHUMG1_61211	10	0	O60038#PHI:1034#Cpcat1#5111#Claviceps_purpurea#unaffected_pathogenicity	No definition line	79.2806
MHUMG1_23651	18	3.063e-89	Q86ZF8#PHI:6199#BbCypA#176275#Beauveria_bassiana#unaffected_pathogenicity	No definition line	79.2683
MHUMG1_80411	27	0	I1RA15#PHI:446__PHI:2348#TBL1__FTL1_(TBL1)#5518#Fusarium_graminearum#reduced_virulence	No definition line	79.2208
MHUMG1_72641	13	0	I1RNL0#PHI:2409#FgMT2#5518#Fusarium_graminearum#reduced_virulence	No definition line	79.2157
MHUMG1_16471	21	0	I1RKC4#PHI:1169__PHI:1172#HDF2#5518#Fusarium_graminearum#reduced_virulence	No definition line	79.1483
MHUMG1_36041	12	0	Q8J1Y3#PHI:409#BbCHIT1#176275#Beauveria_bassiana#increased_virulence_(hypervirulence)	No definition line	79.1304
MHUMG1_25921	31	0	I1RK32#PHI:1293__PHI:3853#GzAPSES001__FgSWI6#5518#Fusarium_graminearum#reduced_virulence	No definition line	79.0365
MHUMG1_43061	122	0	G4MUR7#PHI:4475#MoTup1#318829#Magnaporthe_oryzae#loss_of_pathogenicity	No definition line	78.9855
MHUMG1_53731	262	3.68867e-108	G4N7H6#PHI:5631#FZC36#318829#Magnaporthe_oryzae#unaffected_pathogenicity	No definition line	78.9474
MHUMG1_27041	16	4.34491e-89	Q525E4#PHI:2073__PHI:2091#Moatg5__MgATG5#318829#Magnaporthe_oryzae#loss_of_pathogenicity	No definition line	78.9474
MHUMG1_101901	15	8.60268e-48	I1RF25#PHI:1657#GzCCCH001#5518#Fusarium_graminearum#unaffected_pathogenicity	No definition line	78.9474
MHUMG1_78211	13	2.62287e-101	G4N178#PHI:2153__PHI:2356#MoHyr1__MoHYR1#318829#Magnaporthe_oryzae#reduced_virulence	No definition line	78.9157
MHUMG1_70021	9	0	J5K093#PHI:3096#Ktr4#176275#Beauveria_bassiana#reduced_virulence	No definition line	78.8804
MHUMG1_73801	255	0	I1RDY4#PHI:1869#GzZC184#5518#Fusarium_graminearum#unaffected_pathogenicity	No definition line	78.7346
MHUMG1_55231	5	0	I1RCH5#PHI:1569#GzOB009#5518#Fusarium_graminearum#lethal	No definition line	78.7234
MHUMG1_1031	10	0	I1RB37#PHI:6119#BTA1#5518#Fusarium_graminearum#reduced_virulence	No definition line	78.6982
MHUMG1_55261	237	0	I1RCH8#PHI:1921#GzZC236#5518#Fusarium_graminearum#reduced_virulence	No definition line	78.5714
MHUMG1_56281	14	0	G4MYY5#PHI:7993#PoVrl1_(MGG_10958)__PoVrl1#318829#Magnaporthe_oryzae#unaffected_pathogenicity	No definition line	78.5714
MHUMG1_64981	31	8.06267e-94	I1RC95#PHI:1566#GzOB006#5518#Fusarium_graminearum#lethal	No definition line	78.5714
MHUMG1_52441	3	3.64526e-51	G5EI55#PHI:2154#RBP35#318829#Magnaporthe_oryzae#reduced_virulence	No definition line	78.5714
MHUMG1_76371	293	1.20116e-12	Q0WXM3#PHI:734#FOW2#5507#Fusarium_oxysporum#loss_of_pathogenicity	No definition line	78.5714
MHUMG1_71611	91	2.53542e-09	I1RNH0#PHI:1265#FGSG_05549#5518#Fusarium_graminearum#unaffected_pathogenicity	No definition line	78.5714
MHUMG1_64371	8	1.14659e-06	Q8Y282#PHI:8677#RSc0454#305#Ralstonia_solanacearum#loss_of_pathogenicity	No definition line	78.5714
MHUMG1_65451	7	0	I1RAH2#PHI:1629#GzWing001#5518#Fusarium_graminearum#unaffected_pathogenicity	No definition line	78.3951
MHUMG1_15351	21	3.63436e-84	G4N572#PHI:5047__PHI:6635#MoFis1#318829#Magnaporthe_oryzae#reduced_virulence	No definition line	78.3784
MHUMG1_15371	7	0	Q4WUA3#PHI:2532#HEM15#746128#Aspergillus_fumigatus#lethal	No definition line	78.3708
MHUMG1_37941	86	0	Q86ZP4#PHI:304#GzCPS1#5518#Fusarium_graminearum#reduced_virulence	No definition line	78.3421
MHUMG1_4541	13	6.16691e-28	G4NB53#PHI:5472#MoDeam#318829#Magnaporthe_oryzae#reduced_virulence	No definition line	78.3333
MHUMG1_69881	255	0	Q4I5U9#PHI:1231__PHI:1492#FGSG_07409__GzHMG024#5518#Fusarium_graminearum#lethal__unaffected_pathogenicity	No definition line	78.2241
MHUMG1_46551	9	0	Q4WGR1#PHI:2541#OLE1#746128#Aspergillus_fumigatus#lethal	No definition line	78.1737
MHUMG1_48671	8	0	I1RZG7#PHI:1551#GzMyb015#5518#Fusarium_graminearum#unaffected_pathogenicity	No definition line	78.133
MHUMG1_47461	21	0	P0CT09#PHI:7223#Moend3#318829#Magnaporthe_oryzae#reduced_virulence	No definition line	77.9747
MHUMG1_56571	7	0	G2XJR0#PHI:8670#ACC_deaminase_(VDAG_10392)#27337#Verticillium_dahliae#reduced_virulence__increased_virulence_(hypervirulence)	No definition line	77.907
MHUMG1_34491	10	1.03964e-143	I1RJT8#PHI:8909#FgVPS22_(FGSG_04120)#5518#Fusarium_graminearum#reduced_virulence	No definition line	77.8626
MHUMG1_17001	31	0	I1S5Z3#PHI:1685#GzRad003#5518#Fusarium_graminearum#unaffected_pathogenicity	No definition line	77.8571
MHUMG1_27901	5	0	I1S0A1#PHI:1603#GzOB044#5518#Fusarium_graminearum#unaffected_pathogenicity	No definition line	77.8189
MHUMG1_90881	7	0	J5JFS1#PHI:9046#BbATG7_(BBA_08545)#176275#Beauveria_bassiana#reduced_virulence	No definition line	77.8102
MHUMG1_20651	15	0	Q4I7F9#PHI:1458#GzAra006#5518#Fusarium_graminearum#unaffected_pathogenicity	No definition line	77.7929
MHUMG1_50131	267	1.72947e-157	I1RJB0#PHI:1880#GzZC195#5518#Fusarium_graminearum#unaffected_pathogenicity	No definition line	77.7778
MHUMG1_54521	36	2.74146e-130	D4I229#PHI:7094__PHI:7438#clpV-2__EAMY__3222#552#Erwinia_amylovora#reduced_virulence__unaffected_pathogenicity__increased_virulence_(hypervirulence)	No definition line	77.7778
MHUMG1_38731	8	0	G4NFW7#PHI:8928#MoSCAD2_(MGG_08690)#318829#Magnaporthe_oryzae#loss_of_pathogenicity	No definition line	77.6786
MHUMG1_37491	4	0	I1RR00#PHI:1228#FGSG_06502#5518#Fusarium_graminearum#lethal	No definition line	77.6577
MHUMG1_15711	70	0	Q8TFN4#PHI:1056#CgCHSV#31870#Colletotrichum_graminicola#reduced_virulence	No definition line	77.5227
MHUMG1_50971	5	2.59188e-153	Q5A5Q8#PHI:6076#RPS41#5476#Candida_albicans#reduced_virulence	No definition line	77.5194
MHUMG1_106251	5	3.44563e-169	G2X869#PHI:6147#VdNRS/ER#27337#Verticillium_dahliae#loss_of_pathogenicity	No definition line	77.3973
MHUMG1_56481	16	0	G4MMK2#PHI:3975#MoIlv2#318829#Magnaporthe_oryzae#loss_of_pathogenicity	No definition line	77.2793
MHUMG1_34271	22	0	I1RUP1#PHI:1447#GzGATA005#5518#Fusarium_graminearum#unaffected_pathogenicity	No definition line	77.1957
MHUMG1_53461	10	1.08437e-130	W7MQF2#PHI:3054#FvHAP5#117187#Fusarium_verticillioides#reduced_virulence	No definition line	77.1186
MHUMG1_69221	16	0	I1RTD1#PHI:1645#GzWing017#5518#Fusarium_graminearum#unaffected_pathogenicity	No definition line	77.0858
MHUMG1_47371	170	0	J9MZK9#PHI:2455#CRE1#5507#Fusarium_oxysporum#unaffected_pathogenicity	No definition line	77.0686
MHUMG1_61391	24	2.5347e-114	J4KR13#PHI:5055#vosA#176275#Beauveria_bassiana#reduced_virulence	No definition line	77.0408
MHUMG1_67051	4	0	I1RSE4#PHI:1096#FGSG_07062#5518#Fusarium_graminearum#unaffected_pathogenicity	No definition line	77.037
MHUMG1_53771	256	0	I1RN43#PHI:1268#FGSG_05406#5518#Fusarium_graminearum#unaffected_pathogenicity	No definition line	76.9723
MHUMG1_8291	294	0	I1RBN6#PHI:1799#GzZC114#5518#Fusarium_graminearum#unaffected_pathogenicity	No definition line	76.9417
MHUMG1_431	274	0	D5LHI2#PHI:8857#slnCl1_(GU907087)#290576#Colletotrichum_lindemuthianum#reduced_virulence	No definition line	76.9231
MHUMG1_22441	10	0	I1RZL3#PHI:3996#FgFim#5518#Fusarium_graminearum#reduced_virulence	No definition line	76.9231
MHUMG1_44061	169	0	I1RFP7#PHI:1935#GzZC250#5518#Fusarium_graminearum#unaffected_pathogenicity	No definition line	76.9231
MHUMG1_86441	254	4.09157e-146	I1RTX0#PHI:1871#GzZC186#5518#Fusarium_graminearum#lethal	No definition line	76.9231
MHUMG1_30021	302	3.07587e-127	I1S6X4#PHI:1735#GzZC050#5518#Fusarium_graminearum#unaffected_pathogenicity	No definition line	76.9231
MHUMG1_30091	11	3.72435e-92	G4MMK2#PHI:3975#MoIlv2#318829#Magnaporthe_oryzae#loss_of_pathogenicity	No definition line	76.9231
MHUMG1_35891	236	2.58654e-87	I1RFK9#PHI:1269#FGSG_02488#5518#Fusarium_graminearum#unaffected_pathogenicity	No definition line	76.9231
MHUMG1_7581	3	3.56316e-40	G4N5N3#PHI:5019#MoPEX11C#318829#Magnaporthe_oryzae#unaffected_pathogenicity__reduced_virulence	No definition line	76.9231
MHUMG1_100011	28	8.20791e-29	G4N4N6#PHI:4616#MoSFA1#318829#Magnaporthe_oryzae#reduced_virulence	No definition line	76.9231
MHUMG1_101791	27	2.90517e-28	G2XD68#PHI:8858#VdSSEP1_(VDAG-08100)#27337#Verticillium_dahliae#reduced_virulence	No definition line	76.9231
MHUMG1_23341	37	7.53367e-13	Q3Y5V5#PHI:1018__PHI:2042#ABC3#318829#Magnaporthe_oryzae#loss_of_pathogenicity	No definition line	76.9231
MHUMG1_85051	92	2.01732e-10	I1RZD4#PHI:1413#GzC2H080#5518#Fusarium_graminearum#unaffected_pathogenicity	No definition line	76.9231
MHUMG1_5301	16	6.59217e-09	B2HHI1#PHI:3364#MMAR_1663#1781#Mycobacterium_marinum#reduced_virulence	No definition line	76.9231
MHUMG1_1811	17	0	I1RJR9#PHI:3375#FgSte50#5518#Fusarium_graminearum#loss_of_pathogenicity	No definition line	76.908
MHUMG1_65541	5	0	G4MTZ0#PHI:2114#Calnexin#318829#Magnaporthe_oryzae#loss_of_pathogenicity	No definition line	76.8797
MHUMG1_22321	7	0	G4MRB4#PHI:4491#SHM#318829#Magnaporthe_oryzae#reduced_virulence	No definition line	76.8482
MHUMG1_26541	6	1.94988e-79	J4WFU2#PHI:4107#BbMBF1#176275#Beauveria_bassiana#reduced_virulence	No definition line	76.8212
MHUMG1_31741	20	0	I1S2F2#PHI:1500#GzHMG032#5518#Fusarium_graminearum#unaffected_pathogenicity	No definition line	76.8018
MHUMG1_8361	11	0	G4MTN1#PHI:6348__PHI:8233#MoPmt2__MoPmt2_(MGG_07190)#318829#Magnaporthe_oryzae#reduced_virulence	No definition line	76.7905
MHUMG1_32571	37	2.3417e-143	J5K8H0#PHI:4990#ras3#176275#Beauveria_bassiana#reduced_virulence	No definition line	76.7528
MHUMG1_34631	18	1.71715e-160	I1RJV1#PHI:1366#GzCON7#5518#Fusarium_graminearum#reduced_virulence	No definition line	76.7196
MHUMG1_61981	256	0	I1RS32#PHI:1180#(Sc_Sat4)#5518#Fusarium_graminearum#reduced_virulence	No definition line	76.7152
MHUMG1_49571	15	1.01794e-49	I1RB45#PHI:1301#GzbHLH002#5518#Fusarium_graminearum#unaffected_pathogenicity	No definition line	76.699
MHUMG1_38261	6	0	I1RRG0#PHI:1078#Mes1#5518#Fusarium_graminearum#reduced_virulence	No definition line	76.6404
MHUMG1_68381	257	0	I1RAE5#PHI:1208__PHI:3131#(Sc_Sch9)__FgSCH9#5518#Fusarium_graminearum#reduced_virulence	No definition line	76.5957
MHUMG1_68421	122	3.20847e-178	I1RAF0#PHI:1343#GzC2H003#5518#Fusarium_graminearum#reduced_virulence	No definition line	76.5625
MHUMG1_29471	10	0	Q58Z64#PHI:423#VAD1#5207#Cryptococcus_neoformans#reduced_virulence	No definition line	76.5586
MHUMG1_65311	250	2.83186e-15	I1RGU2#PHI:1899#GzZC214#5518#Fusarium_graminearum#unaffected_pathogenicity	No definition line	76.4706
MHUMG1_34251	7	0	Q4WLT4#PHI:2533#FKS1#746128#Aspergillus_fumigatus#lethal	No definition line	76.412
MHUMG1_72691	25	0	Q9C1E9#PHI:226#PEX6#5462#Colletotrichum_lagenaria#loss_of_pathogenicity	No definition line	76.3337
MHUMG1_32211	42	0	G2XIG8#PHI:7173#HiC-15#27337#Verticillium_dahliae#reduced_virulence	No definition line	76.3052
MHUMG1_24521	9	4.01623e-54	B0XTA5#PHI:2293#cycA#746128#Aspergillus_fumigatus#reduced_virulence	No definition line	76.2887
MHUMG1_6321	259	0	I1RY42#PHI:1207__PHI:3178#(Sc_Kin1/Kin2)__FgKin1#5518#Fusarium_graminearum#reduced_virulence	No definition line	76.2712
MHUMG1_40661	9	0	G4NJL1#PHI:2027#TGL1-1#318829#Magnaporthe_oryzae#unaffected_pathogenicity	No definition line	76.25
MHUMG1_39141	6	0	A0A0D2XWJ8#PHI:4727#gdb1#5507#Fusarium_oxysporum#reduced_virulence__unaffected_pathogenicity	No definition line	76.2332
MHUMG1_15581	9	0	I1RE94#PHI:1572#GzOB012#5518#Fusarium_graminearum#unaffected_pathogenicity	No definition line	76.1232
MHUMG1_72851	4	1.93313e-152	O42772#PHI:822#Ip#1047171#Zymoseptoria_tritici#chemistry_target:_resistance_to_chemical	No definition line	76.0618
MHUMG1_66831	289	0	I1RSG1#PHI:1916#GzZC231#5518#Fusarium_graminearum#unaffected_pathogenicity	No definition line	76.0563
MHUMG1_63321	14	0	I1RC32#PHI:2351__PHI:2353#AMT1#5518#Fusarium_graminearum#reduced_virulence	No definition line	76.0309
MHUMG1_49261	84	0	G4MZY1#PHI:2034#MFP1#318829#Magnaporthe_oryzae#reduced_virulence	No definition line	76.0266
MHUMG1_63601	258	2.33448e-79	I1RBU9#PHI:1557#GzNH002#5518#Fusarium_graminearum#unaffected_pathogenicity	No definition line	76
MHUMG1_20481	352	0	I1RRU2#PHI:1248#FGSG_06832#5518#Fusarium_graminearum#unaffected_pathogenicity	No definition line	75.9615
MHUMG1_47981	55	0	G4MSX7#PHI:772__PHI:797#MGG_01481#318829#Magnaporthe_oryzae#loss_of_pathogenicity__reduced_virulence	No definition line	75.8523
MHUMG1_16051	7	0	A7F6V9#PHI:2911#Ss-pth2#5180#Sclerotinia_sclerotiorum#reduced_virulence	No definition line	75.8333
MHUMG1_19081	7	5.7991e-87	G4ND54#PHI:8041__PHI:8048#Moubc9__Ubc9#318829#Magnaporthe_oryzae#reduced_virulence	No definition line	75.8242
MHUMG1_104091	6	0	W7LZA5#PHI:3886#UBL1#117187#Fusarium_verticillioides#reduced_virulence	No definition line	75.8126
MHUMG1_62261	28	0	I1RC71#PHI:2714#PEX5#5518#Fusarium_graminearum#reduced_virulence	No definition line	75.7622
MHUMG1_38681	3	1.74485e-63	I1RZ35#PHI:1598#GzOB038#5518#Fusarium_graminearum#reduced_virulence	No definition line	75.7353
MHUMG1_46831	16	0	J5JMB3#PHI:6746#Mdj1#176275#Beauveria_bassiana#reduced_virulence	No definition line	75.7339
MHUMG1_47821	7	6.88616e-154	I1RMA5#PHI:4041#spt3#5518#Fusarium_graminearum#reduced_virulence	No definition line	75.6839
MHUMG1_100581	5	0	I1RXX1#PHI:1006#HMR1#5518#Fusarium_graminearum#reduced_virulence	No definition line	75.6388
MHUMG1_41871	8	0	Q0V515#PHI:3914#Sdh1#13684#Parastagonospora_nodorum#reduced_virulence	No definition line	75.6098
MHUMG1_5761	48	0	J4KMX0#PHI:7152#pmcB#176275#Beauveria_bassiana#reduced_virulence	No definition line	75.5788
MHUMG1_14631	10	0	G4MV96#PHI:3823#MET13#318829#Magnaporthe_oryzae#loss_of_pathogenicity	No definition line	75.5481
MHUMG1_90341	17	0	J5JB66#PHI:7035#Pmt1#176275#Beauveria_bassiana#reduced_virulence	No definition line	75.4989
MHUMG1_61301	9	0	J4WK53#PHI:8672#phr2_(EJP70165)#176275#Beauveria_bassiana#unaffected_pathogenicity	No definition line	75.4789
MHUMG1_27111	3	1.68645e-141	I1S047#PHI:7673#FgLetm2#5518#Fusarium_graminearum#unaffected_pathogenicity__reduced_virulence	No definition line	75.3788
MHUMG1_62151	9	8.52893e-80	G4N3J5#PHI:5306#MoSKP1#318829#Magnaporthe_oryzae#loss_of_pathogenicity	No definition line	75.3425
MHUMG1_68341	252	0	I1RAE2#PHI:1241#FGSG_00469#5518#Fusarium_graminearum#unaffected_pathogenicity	No definition line	75.3398
MHUMG1_40621	27	0	I1RWP1#PHI:1648__PHI:6246#GzWing020__Famyo2#5518#Fusarium_graminearum#reduced_virulence	No definition line	75.3225
MHUMG1_66311	14	0	I1RZQ6#PHI:7267#PKR#5518#Fusarium_graminearum#reduced_virulence	No definition line	75.3149
MHUMG1_53741	18	0	I1ZIP0#PHI:6208#BbCyp8#176275#Beauveria_bassiana#unaffected_pathogenicity	No definition line	75.2542
MHUMG1_41751	13	5.89342e-81	I1S4N1#PHI:1427#GzC2H095#5518#Fusarium_graminearum#unaffected_pathogenicity	No definition line	75.2475
MHUMG1_15271	255	0	I1RMV6#PHI:1222#FGSG_05306#5518#Fusarium_graminearum#lethal	No definition line	75.0975
MHUMG1_70171	190	0	I1RSL0#PHI:1915#GzZC230#5518#Fusarium_graminearum#reduced_virulence	No definition line	75
MHUMG1_80631	62	0	I1R9Z6#PHI:1989#GzZC304#5518#Fusarium_graminearum#unaffected_pathogenicity	No definition line	75
MHUMG1_101941	82	3.14081e-149	I1RGE3#PHI:1360#GzC2H020#5518#Fusarium_graminearum#unaffected_pathogenicity	No definition line	75
MHUMG1_47931	6	2.30678e-143	G4MSQ8#PHI:5686#FZC82#318829#Magnaporthe_oryzae#unaffected_pathogenicity	No definition line	75
MHUMG1_57011	8	1.08373e-126	G2X5W3#PHI:8559#SOM1_(VDAG_JR2_Chr1g09120a)#27337#Verticillium_dahliae#loss_of_pathogenicity__reduced_virulence	No definition line	75
MHUMG1_30261	6	2.00417e-125	G4NIU3#PHI:789#MGG_04116#318829#Magnaporthe_oryzae#reduced_virulence	No definition line	75
MHUMG1_82311	129	5.78981e-65	I1RMZ4#PHI:1938#GzZC253#5518#Fusarium_graminearum#unaffected_pathogenicity	No definition line	75
MHUMG1_8841	23	1.27266e-51	W7N2B4#PHI:3381#FVEG_12533#117187#Fusarium_verticillioides#unaffected_pathogenicity	No definition line	75
MHUMG1_58461	101	6.27542e-51	G4N897#PHI:5599#FZC10#318829#Magnaporthe_oryzae#unaffected_pathogenicity	No definition line	75
MHUMG1_81461	5	1.17049e-50	Q2LK92#PHI:548__PHI:2305#BcPIC5__BcFKBP12#40559#Botrytis_cinerea#reduced_virulence__unaffected_pathogenicity__increased_virulence_(hypervirulence)	No definition line	75
MHUMG1_10311	12	5.14173e-40	C5P3X6#PHI:479#MEP1#199306#Coccidioides_posadasii#reduced_virulence	No definition line	75
MHUMG1_104471	71	1.48231e-16	I1RXE8#PHI:1763#GzZC078#5518#Fusarium_graminearum#unaffected_pathogenicity	No definition line	75
MHUMG1_29171	85	1.10306e-10	A5F6S0#PHI:4108#fadD#666#Vibrio_cholerae#reduced_virulence__unaffected_pathogenicity	No definition line	75
MHUMG1_75861	33	1.4769e-137	G4N1P8#PHI:5440#ABA4#318829#Magnaporthe_oryzae#reduced_virulence	No definition line	74.9004
MHUMG1_90861	254	0	I1S0J9#PHI:1185#(Sc_Swe1)#5518#Fusarium_graminearum#reduced_virulence	No definition line	74.8889
MHUMG1_20861	6	5.98524e-84	I1RRW0#PHI:8743#FgPEX4_(FGSG_06857)#5518#Fusarium_graminearum#reduced_virulence	No definition line	74.8387
MHUMG1_105581	19	0	Q9C1C6#PHI:216#HDC1#5017#Bipolaris_zeicola#reduced_virulence	No definition line	74.8011
MHUMG1_31221	3	0	Q4X099#PHI:2638#Ilv3A#746128#Aspergillus_fumigatus#reduced_virulence	No definition line	74.7795
MHUMG1_34501	13	0	J4UPL6#PHI:5394#mas5#176275#Beauveria_bassiana#loss_of_pathogenicity	No definition line	74.7619
MHUMG1_46751	4	6.65052e-154	A0A0E0SEE4#PHI:6259#DOHH#5518#Fusarium_graminearum#reduced_virulence__unaffected_pathogenicity	No definition line	74.6914
MHUMG1_25711	216	0	I1RK16#PHI:1833#GzZC148#5518#Fusarium_graminearum#unaffected_pathogenicity	No definition line	74.6753
MHUMG1_20261	257	0	I1RSK0#PHI:1257#FGSG_07121#5518#Fusarium_graminearum#unaffected_pathogenicity	No definition line	74.6269
MHUMG1_86101	261	0	I1RUM5#PHI:1807#GzZC122#5518#Fusarium_graminearum#lethal	No definition line	74.4939
MHUMG1_28281	13	2.23638e-76	I1S074#PHI:8915#FgVPS32_(FGSG_10092)#5518#Fusarium_graminearum#lethal	No definition line	74.4395
MHUMG1_35211	90	0	W7MG03#PHI:7141#Fsr1#117187#Fusarium_verticillioides#reduced_virulence	No definition line	74.4361
MHUMG1_75481	7	2.15093e-37	I1RXD4#PHI:1596#GzOB036#5518#Fusarium_graminearum#unaffected_pathogenicity	No definition line	74.3902
MHUMG1_75531	6	0	I1RXD6#PHI:1535#GzMADS002#5518#Fusarium_graminearum#unaffected_pathogenicity	No definition line	74.3707
MHUMG1_30751	4	0	I1RM35#PHI:1580#GzOB020#5518#Fusarium_graminearum#unaffected_pathogenicity	No definition line	74.3073
MHUMG1_55941	30	4.82327e-116	I1RCN9#PHI:2427#FgVELB#5518#Fusarium_graminearum#reduced_virulence	No definition line	74.2647
MHUMG1_4851	256	0	I1RWG2#PHI:1242#FGSG_08631#5518#Fusarium_graminearum#unaffected_pathogenicity	No definition line	74.2459
MHUMG1_74341	58	0	G4MXG4#PHI:2095#Calcium-transporting_ATPase_3#318829#Magnaporthe_oryzae#reduced_virulence	No definition line	74.1659
MHUMG1_25031	5	4.85325e-91	I1RK79#PHI:1577#GzOB017#5518#Fusarium_graminearum#unaffected_pathogenicity	No definition line	74.1379
MHUMG1_44171	9	5.59355e-53	I1R9C7#PHI:8667#FgKP4L-2_(FGSG_00061)#5518__4922#Fusarium_graminearum__Komagataella_pastoris#reduced_virulence__increased_virulence_(hypervirulence)	No definition line	74.0741
MHUMG1_51661	20	1.79276e-112	G4NKL4#PHI:3063#MoRga3#318829#Magnaporthe_oryzae#unaffected_pathogenicity	No definition line	74.0196
MHUMG1_102621	258	0	I1RKR8#PHI:1175__PHI:6148#(Sc_Srb10)__FgSsn3#5518#Fusarium_graminearum#reduced_virulence	No definition line	74.0088
MHUMG1_97491	68	0	I1RL06#PHI:3697__PHI:3925#FgABC1__FgABC3#5518#Fusarium_graminearum#reduced_virulence	No definition line	74.005
MHUMG1_52791	8	3.27753e-62	Q51LD2#PHI:2071#Moatg3#318829#Magnaporthe_oryzae#loss_of_pathogenicity	No definition line	74
MHUMG1_74601	21	0	I1RXF3#PHI:1511#GzHOME009#5518#Fusarium_graminearum#reduced_virulence	No definition line	73.9968
MHUMG1_1651	5	1.47843e-87	G4N7A0#PHI:2180#MoTea4#318829#Magnaporthe_oryzae#loss_of_pathogenicity	No definition line	73.9726
MHUMG1_39561	4	0	G4MNG8#PHI:807#MGG_06951#318829#Magnaporthe_oryzae#reduced_virulence	No definition line	73.8562
MHUMG1_31131	7	0	I1RPM7#PHI:1376#GzC2H039#5518#Fusarium_graminearum#unaffected_pathogenicity	No definition line	73.774
MHUMG1_27681	8	3.42771e-127	Q8J0I5#PHI:344#CPTF1#5111#Claviceps_purpurea#reduced_virulence	No definition line	73.6842
MHUMG1_5791	5	2.60394e-34	G4MRZ9#PHI:2181#MoDUO1#318829#Magnaporthe_oryzae#reduced_virulence	No definition line	73.6842
MHUMG1_67531	116	1.50131e-12	G4N4R4#PHI:5676#FZC73#318829#Magnaporthe_oryzae#unaffected_pathogenicity	No definition line	73.6842
MHUMG1_28781	14	0	I1REK5#PHI:733#FBP1#5518#Fusarium_graminearum#reduced_virulence	No definition line	73.6755
MHUMG1_97111	6	4.33879e-109	I1S0X7#PHI:1419#GzC2H086#5518#Fusarium_graminearum#unaffected_pathogenicity	No definition line	73.6677
MHUMG1_49871	4	2.74434e-124	I1R9W2#PHI:1561#GzOB001#5518#Fusarium_graminearum#unaffected_pathogenicity	No definition line	73.6264
MHUMG1_14551	33	2.50688e-134	I1RYV4#PHI:1449#GzGATA007#5518#Fusarium_graminearum#unaffected_pathogenicity	No definition line	73.5849
MHUMG1_16041	5	0	I1RE51#PHI:1542#GzMyb006#5518#Fusarium_graminearum#unaffected_pathogenicity	No definition line	73.503
MHUMG1_28771	7	0	H8ZZ79#PHI:2710#mepB#474922#Colletotrichum_gloeosporioides#reduced_virulence	No definition line	73.4694
MHUMG1_67161	8	3.03674e-110	I1RA31#PHI:1461#GzCCAAT001#5518#Fusarium_graminearum#unaffected_pathogenicity	No definition line	73.4513
MHUMG1_11241	254	0	I1RYF8#PHI:1236#FGSG_09408#5518#Fusarium_graminearum#lethal	No definition line	73.397
MHUMG1_67511	8	0	I1RU06#PHI:6124__PHI:5750#FGSG_07678__ScOrtholog_GIC1#5518#Fusarium_graminearum#reduced_virulence	No definition line	73.3668
MHUMG1_14561	85	0	I1RYV5#PHI:1514#GzHOME012#5518#Fusarium_graminearum#unaffected_pathogenicity	No definition line	73.3333
MHUMG1_100001	222	8.93585e-121	I1S6C7#PHI:1730#GzZC045#5518#Fusarium_graminearum#unaffected_pathogenicity	No definition line	73.3333
MHUMG1_99351	49	9.60577e-30	G2XIG8#PHI:7173#HiC-15#27337#Verticillium_dahliae#reduced_virulence	No definition line	73.3333
MHUMG1_61861	7	0	I1RS43#PHI:1585#GzOB025#5518#Fusarium_graminearum#unaffected_pathogenicity	No definition line	73.2984
MHUMG1_88941	253	3.76768e-133	I1RFC7#PHI:1239#FGSG_02399#5518#Fusarium_graminearum#unaffected_pathogenicity	No definition line	73.2218
MHUMG1_20701	4	0	I1RRX4#PHI:1291#TOP1#5518#Fusarium_graminearum#reduced_virulence	No definition line	73.1813
MHUMG1_24541	6	2.46947e-68	I1S297#PHI:8912#FgVPS20_(FGSG_10883)#5518#Fusarium_graminearum#reduced_virulence	No definition line	73.1343
MHUMG1_49171	6	3.35356e-105	I1RZ11#PHI:1411#GzC2H078#5518#Fusarium_graminearum#lethal	No definition line	73.1092
MHUMG1_24911	8	0	Q4HWE2#PHI:1671#GzCCHC011#5518#Fusarium_graminearum#reduced_virulence	No definition line	73.0958
MHUMG1_63121	3	6.28973e-158	I1RC15#PHI:1633#GzWing005#5518#Fusarium_graminearum#unaffected_pathogenicity	No definition line	73.0435
MHUMG1_50091	1	0	G4MU34#PHI:3257#MoIlv1#318829#Magnaporthe_oryzae#reduced_virulence	No definition line	72.9779
MHUMG1_51111	7	0	Q1HA66#PHI:6969#cokel2#5465#Colletotrichum_orbiculare#reduced_virulence	No definition line	72.8778
MHUMG1_12981	263	0	I1RT48#PHI:1216#FGSG_07344#5518#Fusarium_graminearum#reduced_virulence	No definition line	72.8528
MHUMG1_32891	14	0	I1RQE9#PHI:1317#GzBrom002#5518#Fusarium_graminearum#reduced_virulence	No definition line	72.8214
MHUMG1_58671	3	2.81662e-104	I1RRB0#PHI:7124#FgEB1#5518#Fusarium_graminearum#reduced_virulence	No definition line	72.7679
MHUMG1_97181	254	0	I1S0Y9#PHI:1186#(Sc_Cdc15)#5518#Fusarium_graminearum#reduced_virulence	No definition line	72.7582
MHUMG1_24811	9	0	I1SAP7#PHI:1624#GzJUM006#5518#Fusarium_graminearum#unaffected_pathogenicity	No definition line	72.7273
MHUMG1_23721	7	0	I1S1X8#PHI:2355#AMT4#5518#Fusarium_graminearum#reduced_virulence	No definition line	72.7041
MHUMG1_45861	3	0	I1RMR7#PHI:8911#FgVPS36_(FGSG_05263)#5518#Fusarium_graminearum#reduced_virulence	No definition line	72.7027
MHUMG1_43721	69	0	Q8J286#PHI:244#CLAP1#290576#Colletotrichum_lindemuthianum#loss_of_pathogenicity	No definition line	72.6809
MHUMG1_25931	11	8.9998e-122	I1RK33#PHI:1683#GzRad001#5518#Fusarium_graminearum#lethal	No definition line	72.6804
MHUMG1_89871	6	4.10303e-165	Q4WCZ1#PHI:2969#argEF#746128#Aspergillus_fumigatus#reduced_virulence	No definition line	72.561
MHUMG1_12751	188	0	I1RRS3#PHI:1816#GzZC131#5518#Fusarium_graminearum#unaffected_pathogenicity	No definition line	72.5557
MHUMG1_51561	9	7.86329e-144	I1RWH5#PHI:1589#GzOB029#5518#Fusarium_graminearum#unaffected_pathogenicity	No definition line	72.4907
MHUMG1_53051	87	0	I1RE06#PHI:1356#GzC2H016#5518#Fusarium_graminearum#unaffected_pathogenicity	No definition line	72.4731
MHUMG1_82281	14	2.33007e-81	W7M2E5#PHI:3356#Mads2#117187#Fusarium_verticillioides#unaffected_pathogenicity	No definition line	72.4719
MHUMG1_75381	39	0	G4MRP8#PHI:2190#MoCYP51A#318829#Magnaporthe_oryzae#reduced_virulence	No definition line	72.4537
MHUMG1_36731	47	0	Q4I8B6#PHI:1675#GzDHHC003#5518#Fusarium_graminearum#unaffected_pathogenicity	No definition line	72.409
MHUMG1_8421	8	0	W7MS09#PHI:3385#FVEG_12529#117187#Fusarium_verticillioides#unaffected_pathogenicity	No definition line	72.3653
MHUMG1_12131	256	0	I1RRQ8#PHI:1211#(Sc_Ctk1)#5518#Fusarium_graminearum#reduced_virulence	No definition line	72.3356
MHUMG1_10481	3	0	G4MTK2#PHI:5232#MoARG1#318829#Magnaporthe_oryzae#loss_of_pathogenicity	No definition line	72.2892
MHUMG1_62311	7	0	I1RC64#PHI:1554#GzMyb018#5518#Fusarium_graminearum#unaffected_pathogenicity	No definition line	72.2628
MHUMG1_65411	46	0	J4KLZ9#PHI:7155#pmr1#176275#Beauveria_bassiana#reduced_virulence	No definition line	72.2498
MHUMG1_21631	3	6.1635e-148	A0A0E0S648#PHI:5780#Fgsg04051#5518#Fusarium_graminearum#unaffected_pathogenicity	No definition line	72.2408
MHUMG1_77211	6	0	E3QNW8#PHI:6228#KRE6#31870#Colletotrichum_graminicola#reduced_virulence	No definition line	72.2338
MHUMG1_3491	295	0	I1RVT7#PHI:1790#GzZC105#5518#Fusarium_graminearum#lethal	No definition line	72.2222
MHUMG1_6211	25	8.14877e-94	I1RY51#PHI:1333#GzbZIP015#5518#Fusarium_graminearum#unaffected_pathogenicity	No definition line	72.2222
MHUMG1_54481	17	2.96023e-91	I1RNA7#PHI:1507#GzHOME002#5518#Fusarium_graminearum#unaffected_pathogenicity	No definition line	72.2222
MHUMG1_76961	24	3.62953e-31	G2X8Y4#PHI:7741#FreB#27337#Verticillium_dahliae#reduced_virulence	No definition line	72.2222
MHUMG1_12641	15	5.81812e-07	L0BUT7#PHI:3870#AbDhn3#29001#Alternaria_brassicicola#unaffected_pathogenicity	No definition line	72.2222
MHUMG1_43051	10	0	I1RFM2#PHI:3035#FgERG3A#5518#Fusarium_graminearum#reduced_virulence	No definition line	72.2063
MHUMG1_48251	16	1.86742e-116	G4MT58#PHI:5480#MoPyr5#318829#Magnaporthe_oryzae#reduced_virulence	No definition line	72.1973
MHUMG1_61741	255	1.38534e-135	I1RFC7#PHI:1239#FGSG_02399#5518#Fusarium_graminearum#unaffected_pathogenicity	No definition line	72.1116
MHUMG1_97211	31	0	I1S0Z2#PHI:1296#GzAPSES004#5518#Fusarium_graminearum#reduced_virulence	No definition line	72.0544
MHUMG1_77981	23	0	Q5AJB1#PHI:3321#Tfp1#5476#Candida_albicans#loss_of_pathogenicity	No definition line	72.0339
MHUMG1_100501	8	0	I1RXT3#PHI:7672#FgLetm1#5518#Fusarium_graminearum#reduced_virulence	No definition line	72.0074
MHUMG1_91691	11	0	I1SA65#PHI:1440__PHI:5574#GzNot002__FgNOT3#5518#Fusarium_graminearum#reduced_virulence	No definition line	71.9449
MHUMG1_52171	8	0	I1RX04#PHI:1406#GzC2H070#5518#Fusarium_graminearum#lethal	No definition line	71.9355
MHUMG1_80381	29	0	G2XAE9#PHI:5387#VdCYC8#27337#Verticillium_dahliae#reduced_virulence	No definition line	71.9212
MHUMG1_42201	4	1.01836e-122	G4MTK2#PHI:5232#MoARG1#318829#Magnaporthe_oryzae#loss_of_pathogenicity	No definition line	71.9008
MHUMG1_54491	9	0	I1RNA9#PHI:1508#GzHOME003#5518#Fusarium_graminearum#unaffected_pathogenicity	No definition line	71.8421
MHUMG1_61891	10	3.789e-125	F9X691#PHI:4914#ZtCBR1#1047171#Zymoseptoria_tritici#reduced_virulence	No definition line	71.8147
MHUMG1_5551	18	0	I1RYN7#PHI:1299#GzAT003#5518#Fusarium_graminearum#unaffected_pathogenicity	No definition line	71.8085
MHUMG1_54381	19	0	F8U971#PHI:6157#bcdh#40559#Botrytis_cinerea#unaffected_pathogenicity	No definition line	71.8072
MHUMG1_24051	2	5.72407e-144	I1S245#PHI:1659#GzCCCH003#5518#Fusarium_graminearum#unaffected_pathogenicity	No definition line	71.8033
MHUMG1_48821	8	4.87118e-136	B0YE73#PHI:7591#erg25B#746128#Aspergillus_fumigatus#unaffected_pathogenicity	No definition line	71.7842
MHUMG1_15541	8	0	I1RE91#PHI:8925#FgPLD2_(FGSG_01973)#5518#Fusarium_graminearum#unaffected_pathogenicity	No definition line	71.7521
MHUMG1_26911	44	0	I1S0G8#PHI:1247#FGSG_10196#5518#Fusarium_graminearum#unaffected_pathogenicity	No definition line	71.7448
MHUMG1_106261	17	0	F8U971#PHI:6157#bcdh#40559#Botrytis_cinerea#unaffected_pathogenicity	No definition line	71.7172
MHUMG1_66801	5	0	Q4I6S5#PHI:6898#FgMon1#5518#Fusarium_graminearum#reduced_virulence	No definition line	71.7047
MHUMG1_18981	56	0	G4N471#PHI:2098#Calcium-transporting_ATPase_3#318829#Magnaporthe_oryzae#loss_of_pathogenicity	No definition line	71.6514
MHUMG1_14301	255	0	I1RP88#PHI:1226#FGSG_05845#5518#Fusarium_graminearum#lethal	No definition line	71.6511
MHUMG1_1411	255	0	I1RWQ0#PHI:1240__PHI:3088#FGSG_08729__CPK2#5518#Fusarium_graminearum#unaffected_pathogenicity__loss_of_pathogenicity	No definition line	71.6418
MHUMG1_55471	464	0	I1RCJ5#PHI:1212#(Sc_Rim15)#5518#Fusarium_graminearum#reduced_virulence	No definition line	71.6126
MHUMG1_83201	40	0	G4N745#PHI:5083#MoAcat2#318829#Magnaporthe_oryzae#reduced_virulence	No definition line	71.6019
MHUMG1_46791	4	3.05836e-71	I1RZC6#PHI:1088#FGSG_09759#5518#Fusarium_graminearum#unaffected_pathogenicity	No definition line	71.5686
MHUMG1_3961	255	1.34821e-177	I1RW16#PHI:1178__PHI:4941#(Sc_Cdc28)__cdc2A#5518#Fusarium_graminearum#reduced_virulence__lethal__loss_of_pathogenicity	No definition line	71.5517
MHUMG1_16221	13	5.19009e-143	Q524W4#PHI:2084#Moatg18#318829#Magnaporthe_oryzae#reduced_virulence	No definition line	71.5517
MHUMG1_53921	268	0	I1RN54#PHI:1214#FGSG_07816#5518#Fusarium_graminearum#reduced_virulence	No definition line	71.4595
MHUMG1_44391	96	0	I1RFR7#PHI:1944#GzZC259#5518#Fusarium_graminearum#unaffected_pathogenicity	No definition line	71.4286
MHUMG1_47351	6	0	G4MSK7#PHI:7149#Moglo3#318829#Magnaporthe_oryzae#reduced_virulence	No definition line	71.4286
MHUMG1_11211	260	7.18859e-119	I1RG27#PHI:1442#GzDNL#5518#Fusarium_graminearum#unaffected_pathogenicity	No definition line	71.4286
MHUMG1_56111	30	8.18761e-88	I1RC95#PHI:1566#GzOB006#5518#Fusarium_graminearum#lethal	No definition line	71.4286
MHUMG1_89401	33	8.85897e-66	I1RI51#PHI:5792#Fgsg03476#5518#Fusarium_graminearum#unaffected_pathogenicity	No definition line	71.4286
MHUMG1_7321	10	7.70129e-43	Q2I0M6#PHI:1051#CTB3#29003#Cercospora_nicotianae#reduced_virulence	No definition line	71.4286
MHUMG1_95461	12	6.08615e-35	C5P3X6#PHI:479#MEP1#199306#Coccidioides_posadasii#reduced_virulence	No definition line	71.4286
MHUMG1_28451	19	1.71318e-21	Q4WF54#PHI:2322#SidH#746128#Aspergillus_fumigatus#reduced_virulence	No definition line	71.4286
MHUMG1_74991	209	1.16937e-14	I1RUC7#PHI:1260#FGSG_07816#5518#Fusarium_graminearum#unaffected_pathogenicity	No definition line	71.4286
MHUMG1_100041	22	1.5988e-10	B2HHI1#PHI:3364#MMAR_1663#1781#Mycobacterium_marinum#reduced_virulence	No definition line	71.4286
MHUMG1_46621	5	0	N4VBG2#PHI:6970#copag1#5465#Colletotrichum_orbiculare#reduced_virulence	No definition line	71.395
MHUMG1_71551	17	0	I1RNH4#PHI:5028#gta1#5518#Fusarium_graminearum#unaffected_pathogenicity__reduced_virulence	No definition line	71.3718
MHUMG1_66761	12	3.85338e-96	I1RSG9#PHI:1466#GzCCAAT006#5518#Fusarium_graminearum#unaffected_pathogenicity	No definition line	71.3636
MHUMG1_101961	333	0	I1RGD9#PHI:1941#GzZC256#5518#Fusarium_graminearum#unaffected_pathogenicity	No definition line	71.3147
MHUMG1_14181	2	0	I1RYY6#PHI:6094#FgVps17#5518#Fusarium_graminearum#reduced_virulence	No definition line	71.2903
MHUMG1_48021	4	1.38716e-170	I1RMC1#PHI:1678#GzGRF#5518#Fusarium_graminearum#unaffected_pathogenicity	No definition line	71.1911
MHUMG1_16611	13	0	A0A098DK45#PHI:7123#Fgvps39#5518#Fusarium_graminearum#reduced_virulence	No definition line	71.1771
MHUMG1_24281	26	1.47033e-168	G4NHC2#PHI:5034#MoADH1#318829#Magnaporthe_oryzae#unaffected_pathogenicity	No definition line	71.1429
MHUMG1_29401	33	0	Q8NJS2#PHI:697#ugt51E1#5022#Leptosphaeria_maculans#unaffected_pathogenicity	No definition line	71.1286
MHUMG1_7171	265	2.25218e-42	I1S0X3#PHI:1776#GzZC091#5518#Fusarium_graminearum#unaffected_pathogenicity	No definition line	71.1111
MHUMG1_26131	17	2.03241e-58	G4N0E4#PHI:4056#Ldp1#318829#Magnaporthe_oryzae#unaffected_pathogenicity	No definition line	71.0938
MHUMG1_50601	9	0	G5EHZ3#PHI:9055#MoIVD_(MGG_02540)#318829#Magnaporthe_oryzae#reduced_virulence	No definition line	71.066
MHUMG1_41991	14	0	I1RBE8#PHI:9047#FgPah1_(FGSG_00866)#5518#Fusarium_graminearum#reduced_virulence	No definition line	71.0602
MHUMG1_47871	13	0	E2GL14#PHI:2334#BcNma#40559#Botrytis_cinerea#reduced_virulence	No definition line	70.9931
MHUMG1_68861	253	0	I1RTL1#PHI:1245#FGSG_07520#5518#Fusarium_graminearum#unaffected_pathogenicity	No definition line	70.8419
MHUMG1_12521	57	0	J5JIF8#PHI:7153#pmcC#176275#Beauveria_bassiana#reduced_virulence	No definition line	70.8042
MHUMG1_40601	9	0	I1S8Y9#PHI:1182#(Sc_Mec1)#5518#Fusarium_graminearum#reduced_virulence	No definition line	70.7878
MHUMG1_93181	189	4.64748e-51	I1RVR1#PHI:1860#GzZC175#5518#Fusarium_graminearum#unaffected_pathogenicity	No definition line	70.7692
MHUMG1_921	258	0	I1RNY7#PHI:1181#(Sc_Kic1)#5518#Fusarium_graminearum#reduced_virulence	No definition line	70.767
MHUMG1_60641	10	0	Q1L2E2#PHI:595__PHI:2248#ALS1__Als1#13684#Parastagonospora_nodorum#reduced_virulence__loss_of_pathogenicity	No definition line	70.7516
MHUMG1_77131	8	2.33494e-137	Q4WCZ1#PHI:2969#argEF#746128#Aspergillus_fumigatus#reduced_virulence	No definition line	70.7071
MHUMG1_69841	8	0	I1RTA6#PHI:3863#FgGAL83#5518#Fusarium_graminearum#reduced_virulence	No definition line	70.5882
MHUMG1_86081	139	0	I1RUM9#PHI:1396#GzC2H059#5518#Fusarium_graminearum#reduced_virulence	No definition line	70.5882
MHUMG1_104931	89	0	W7MT31#PHI:3387#FVEG_12523#117187#Fusarium_verticillioides#unaffected_pathogenicity	No definition line	70.5882
MHUMG1_33651	7	1.03162e-119	Q5ANA8#PHI:6795#CaMCA1#5476#Candida_albicans#reduced_virulence	No definition line	70.5882
MHUMG1_66881	14	0	I1RSE9#PHI:1917#GzZC232#5518#Fusarium_graminearum#reduced_virulence	No definition line	70.5691
MHUMG1_5411	11	1.53729e-168	Q696X2#PHI:414#GOX1#13684#Parastagonospora_nodorum#unaffected_pathogenicity	No definition line	70.5686
MHUMG1_77831	7	0	A4R5F6#PHI:5234#MoARG7#318829#Magnaporthe_oryzae#reduced_virulence	No definition line	70.5479
MHUMG1_14231	90	0	A4RJV3#PHI:6135__PHI:6636#PEF1__MoMdv1#318829#Magnaporthe_oryzae#reduced_virulence	No definition line	70.4615
MHUMG1_41811	26	0	Q0U2A0#PHI:2255#Abd1#13684#Parastagonospora_nodorum#unaffected_pathogenicity	No definition line	70.4607
MHUMG1_78991	14	0	I1RPA0#PHI:1375#GzC2H038#5518#Fusarium_graminearum#unaffected_pathogenicity	No definition line	70.4365
MHUMG1_50431	253	0	I1RB84#PHI:1263#FGSG_00792#5518#Fusarium_graminearum#unaffected_pathogenicity	No definition line	70.4132
MHUMG1_69711	11	5.68091e-162	I1RT91#PHI:1388#GzC2H051#5518#Fusarium_graminearum#unaffected_pathogenicity	No definition line	70.347
MHUMG1_1261	14	1.02462e-165	I1RB11#PHI:1443#GzGATA001#5518#Fusarium_graminearum#unaffected_pathogenicity	No definition line	70.3297
MHUMG1_68541	5	0	G4NJD1#PHI:2171#Peroxisomal_copper_amine_oxidase#318829#Magnaporthe_oryzae#reduced_virulence	No definition line	70.2586
MHUMG1_1071	8	6.75949e-132	I1RB25#PHI:1473#GzHMG005#5518#Fusarium_graminearum#reduced_virulence	No definition line	70.2055
MHUMG1_52531	10	0	A0A0A2JZB1#PHI:8722__PHI:8724#PeCat__PeSat#27334#Penicillium_expansum#unaffected_pathogenicity__reduced_virulence	No definition line	70.1906
MHUMG1_3911	5	0	I1RW22#PHI:1439#GzNot001#5518#Fusarium_graminearum#lethal	No definition line	70.1754
MHUMG1_6241	8	0	W7LT88#PHI:2463#RGSC1#117187#Fusarium_verticillioides#unaffected_pathogenicity	No definition line	70.1395
MHUMG1_70071	8	0	G4MZ63#PHI:3824#MET12#318829#Magnaporthe_oryzae#unaffected_pathogenicity__loss_of_pathogenicity	No definition line	70.1299
MHUMG1_1171	54	0	I1RB16#PHI:1967#GzZC282#5518#Fusarium_graminearum#reduced_virulence	No definition line	70.0935
MHUMG1_36101	5	0	Q4WQ27#PHI:2519#LYS9#746128#Aspergillus_fumigatus#lethal	No definition line	70.068
MHUMG1_68941	37	3.20104e-91	Q8J2P6#PHI:317#RHBA#746128#Aspergillus_fumigatus#reduced_virulence	No definition line	70.0535
MHUMG1_55391	5	0	I1RCJ0#PHI:1304#GzbHLH005#5518#Fusarium_graminearum#reduced_virulence	No definition line	70.0186
MHUMG1_54881	253	0	I1RCF7#PHI:1220#FGSG_01271#5518#Fusarium_graminearum#lethal	No definition line	70.0101
MHUMG1_50391	10	0	J4KQS2#PHI:8671#phr1_(EJP69699)#176275#Beauveria_bassiana#unaffected_pathogenicity	No definition line	70
MHUMG1_88311	98	2.34641e-178	Q4WR83#PHI:2321#SidI#746128#Aspergillus_fumigatus#reduced_virulence	No definition line	70
MHUMG1_56201	6	2.56835e-172	W7MCU7#PHI:7597#FvDim5#117187#Fusarium_verticillioides#reduced_virulence	No definition line	70
MHUMG1_93751	107	1.93318e-15	I1RV71#PHI:1812#GzZC127#5518#Fusarium_graminearum#unaffected_pathogenicity	No definition line	70
MHUMG1_78761	84	7.62551e-06	I1RUC7#PHI:1260#FGSG_07816#5518#Fusarium_graminearum#unaffected_pathogenicity	No definition line	70
MHUMG1_55281	15	0	I1RCI0#PHI:1454#GzAra002#5518#Fusarium_graminearum#unaffected_pathogenicity	No definition line	69.9851
MHUMG1_22181	297	0	I1RZN4#PHI:1753#GzZC068#5518#Fusarium_graminearum#unaffected_pathogenicity	No definition line	69.9638
MHUMG1_103491	3	0	Q4WP25#PHI:2542#ERG12#746128#Aspergillus_fumigatus#lethal	No definition line	69.8901
MHUMG1_78541	52	0	G4NGP6#PHI:2097#Neo1#318829#Magnaporthe_oryzae#loss_of_pathogenicity	No definition line	69.8054
MHUMG1_42161	8	0	S5FRT9#PHI:3828#AbaA#5518#Fusarium_graminearum#unaffected_pathogenicity	No definition line	69.7882
MHUMG1_24581	5	1.77643e-57	I1S2A0#PHI:1653#GzWing026#5518#Fusarium_graminearum#unaffected_pathogenicity	No definition line	69.7479
MHUMG1_46261	264	0	I1RQ67#PHI:1255#FGSG_06206#5518#Fusarium_graminearum#unaffected_pathogenicity	No definition line	69.7222
MHUMG1_47491	1	1.37994e-121	I1RZ94#PHI:1649#GzWing021#5518#Fusarium_graminearum#unaffected_pathogenicity	No definition line	69.6751
MHUMG1_51491	14	0	W7MGE8#PHI:8037#Fvlds1#117187#Fusarium_verticillioides#reduced_virulence	No definition line	69.6707
MHUMG1_39701	7	0	Q4WP25#PHI:2542#ERG12#746128#Aspergillus_fumigatus#lethal	No definition line	69.6507
MHUMG1_2591	2	0	I1RV65#PHI:1398#GzC2H061#5518#Fusarium_graminearum#unaffected_pathogenicity	No definition line	69.6462
MHUMG1_81161	17	0	I1RMG9#PHI:1011#FET3#5518#Fusarium_graminearum#unaffected_pathogenicity	No definition line	69.6113
MHUMG1_39461	336	7.7052e-144	I1RIH3#PHI:1710#GzZC025#5518#Fusarium_graminearum#unaffected_pathogenicity	No definition line	69.5652
MHUMG1_67681	7	0	Q4WKG5#PHI:2530#TUB1#746128#Aspergillus_fumigatus#lethal__loss_of_pathogenicity	No definition line	69.5556
MHUMG1_69911	8	0	I1RT82#PHI:1287#FGSG_07381#5518#Fusarium_graminearum#unaffected_pathogenicity	No definition line	69.5175
MHUMG1_39521	10	0	Q9UVG2#PHI:177#ODC#13684#Parastagonospora_nodorum#reduced_virulence	No definition line	69.5122
MHUMG1_60711	80	0	G4N7K8#PHI:9032#Mocrn1_(MGG_06389)#318829#Magnaporthe_oryzae#reduced_virulence__unaffected_pathogenicity	No definition line	69.4805
MHUMG1_411	12	1.44685e-145	A7ESB3#PHI:3329#Ss-oah1#5180#Sclerotinia_sclerotiorum#reduced_virulence	No definition line	69.4737
MHUMG1_59791	22	2.46997e-141	I1S7Z8#PHI:1432#GzC2H100#5518#Fusarium_graminearum#unaffected_pathogenicity	No definition line	69.4444
MHUMG1_9121	4	0	G4N9W2#PHI:6607#ARRDC1#318829#Magnaporthe_oryzae#reduced_virulence	No definition line	69.4313
MHUMG1_51021	3	0	C6ZRH8#PHI:2976#CgOPT1#474922#Colletotrichum_gloeosporioides#reduced_virulence	No definition line	69.4134
MHUMG1_64021	66	8.4801e-107	Q5AND9#PHI:7009#arf2#5476#Candida_albicans#reduced_virulence	No definition line	69.3694
MHUMG1_65491	5	1.55471e-130	J5JBK6#PHI:7058#PilB#176275#Beauveria_bassiana#reduced_virulence	No definition line	69.3603
MHUMG1_31881	28	0	I1S2I3#PHI:1695#GzZC010#5518#Fusarium_graminearum#unaffected_pathogenicity	No definition line	69.2568
MHUMG1_70651	17	1.46794e-176	A4QVH4#PHI:5187#MoCCP1#318829#Magnaporthe_oryzae#reduced_virulence	No definition line	69.2529
MHUMG1_91301	32	6.813e-56	I1S0Q0#PHI:1670#GzCCHC010#5518#Fusarium_graminearum#unaffected_pathogenicity	No definition line	69.2308
MHUMG1_86391	28	2.28202e-49	W7N2B4#PHI:3381#FVEG_12533#117187#Fusarium_verticillioides#unaffected_pathogenicity	No definition line	69.2308
MHUMG1_96781	10	9.66802e-33	B4EDS9#PHI:5297#BCAL2200#95486#Burkholderia_cenocepacia#reduced_virulence	No definition line	69.2308
MHUMG1_102661	170	5.88798e-21	I1RKR4#PHI:1868#GzZC183#5518#Fusarium_graminearum#unaffected_pathogenicity	No definition line	69.2308
MHUMG1_80331	9	0	Q4WLR6#PHI:7653#trpA#746128#Aspergillus_fumigatus#reduced_virulence	No definition line	69.2157
MHUMG1_77841	5	1.52701e-112	O42621#PHI:121#PTH3#318829#Magnaporthe_oryzae#loss_of_pathogenicity	No definition line	69.163
MHUMG1_4641	289	3.17219e-157	I1RWF1#PHI:1403#GzC2H066#5518#Fusarium_graminearum#reduced_virulence	No definition line	69.1589
MHUMG1_15721	82	0	G4XVC0#PHI:2302#CHS5#318829#Magnaporthe_oryzae#loss_of_pathogenicity	No definition line	69.1584
MHUMG1_10751	14	0	I1R9N5#PHI:3910#FgSAT#5518#Fusarium_graminearum#unaffected_pathogenicity	No definition line	69.1552
MHUMG1_30851	23	0	B9DR51#PHI:1133#Lmepi#5022#Leptosphaeria_maculans#loss_of_pathogenicity	No definition line	69.1489
MHUMG1_34231	6	0	E3QI05#PHI:6826#GAA1#31870#Colletotrichum_graminicola#loss_of_pathogenicity	No definition line	69.1293
MHUMG1_5171	7	0	I1RW84#PHI:6183#FgVps27#5518#Fusarium_graminearum#reduced_virulence	No definition line	69.1275
MHUMG1_71021	3	1.4273e-133	G4MR53#PHI:7188#MoCAPB#318829#Magnaporthe_oryzae#reduced_virulence	No definition line	69.1228
MHUMG1_36751	6	0	Q4X256#PHI:6556#mecA#746128#Aspergillus_fumigatus#unaffected_pathogenicity__reduced_virulence	No definition line	69.0385
MHUMG1_55551	220	0	I1RCK0#PHI:1920#GzZC235#5518#Fusarium_graminearum#unaffected_pathogenicity	No definition line	69.0299
MHUMG1_11951	4	1.23422e-45	G4MQZ2#PHI:2038#Mir1#318829#Magnaporthe_oryzae#unaffected_pathogenicity	No definition line	69.0265
MHUMG1_47221	2	3.56546e-167	I1RM32#PHI:9048#FgSpo7_(FGSG_05009)#5518#Fusarium_graminearum#reduced_virulence	No definition line	69.0176
MHUMG1_78371	626	0	I1RME6#PHI:1274#FGSG_05135#5518#Fusarium_graminearum#unaffected_pathogenicity	No definition line	69.0055
MHUMG1_2931	77	0	Q874F3#PHI:391#ABC2#318829#Magnaporthe_oryzae#unaffected_pathogenicity	No definition line	68.8904
MHUMG1_5531	272	0	Q7Z8E9#PHI:518#MST20#318829#Magnaporthe_oryzae#unaffected_pathogenicity	No definition line	68.8742
MHUMG1_1321	14	1.28471e-85	G4NFU3#PHI:2103#MGG_08710.5#318829#Magnaporthe_oryzae#unaffected_pathogenicity	No definition line	68.8716
MHUMG1_9651	140	2.48252e-143	I1RD84#PHI:1355#GzC2H015#5518#Fusarium_graminearum#unaffected_pathogenicity	No definition line	68.8571
MHUMG1_36791	42	0	I1RR41#PHI:6186#FgCHS8#5518#Fusarium_graminearum#reduced_virulence	No definition line	68.8172
MHUMG1_64201	9	0	I1RBU0#PHI:1632#GzWing004#5518#Fusarium_graminearum#unaffected_pathogenicity	No definition line	68.7601
MHUMG1_4581	9	0	G4NB58#PHI:5471#MoDac#318829#Magnaporthe_oryzae#reduced_virulence	No definition line	68.75
MHUMG1_23711	8	0	I1RM25#PHI:1579#GzOB019#5518#Fusarium_graminearum#unaffected_pathogenicity	No definition line	68.75
MHUMG1_62721	15	0	G4MQB0#PHI:3066#MoRga6#318829#Magnaporthe_oryzae#unaffected_pathogenicity	No definition line	68.75
MHUMG1_18891	116	7.46993e-117	I1S584#PHI:1687#GzZC002#5518#Fusarium_graminearum#unaffected_pathogenicity	No definition line	68.75
MHUMG1_81501	9	1.47725e-53	Q00368#PHI:27#CAP20#474922#Colletotrichum_gloeosporioides#loss_of_pathogenicity	No definition line	68.75
MHUMG1_78041	6	6.15019e-26	Q9UUS8#PHI:167#CHIP3#474922#Colletotrichum_gloeosporioides#unaffected_pathogenicity	No definition line	68.75
MHUMG1_104401	46	1.81996e-18	I1S8Y4#PHI:1338#GzbZIP020#5518#Fusarium_graminearum#unaffected_pathogenicity	No definition line	68.75
MHUMG1_12281	6	3.26278e-06	Q9A0G6#PHI:5069#GacA#1314#Streptococcus_pyogenes#lethal	No definition line	68.75
MHUMG1_93111	10	3.65638e-111	G4MXC5#PHI:5190#MoPRX1#318829#Magnaporthe_oryzae#reduced_virulence	No definition line	68.6916
MHUMG1_16061	7	0	I1RE49#PHI:7111#FgCAP1#5518#Fusarium_graminearum#reduced_virulence	No definition line	68.6907
MHUMG1_15841	43	0	B5M4A8#PHI:2116__PHI:2301#CHS7#318829#Magnaporthe_oryzae#reduced_virulence	No definition line	68.6885
MHUMG1_85421	6	0	Q7ZA48#PHI:323#VFGLU1#93591#Lecanicillium_fungicola#reduced_virulence	No definition line	68.5096
MHUMG1_24081	5	1.23862e-99	I1S248#PHI:8914#FgVPS24_(FGSG_10832)#5518#Fusarium_graminearum#lethal	No definition line	68.4874
MHUMG1_64561	119	0	I1S4M4#PHI:1426#GzC2H094#5518#Fusarium_graminearum#unaffected_pathogenicity	No definition line	68.4211
MHUMG1_88141	102	0	I1S2J9#PHI:3924__PHI:8224__PHI:9036#FgABC1__Fg10995__fgm5_(FGSG_10995)#5518#Fusarium_graminearum#reduced_virulence	No definition line	68.4211
MHUMG1_81301	257	3.02459e-31	I1RYK8#PHI:1847#GzZC162#5518#Fusarium_graminearum#unaffected_pathogenicity	No definition line	68.4211
MHUMG1_12901	63	1.90702e-09	G4MUR7#PHI:4475#MoTup1#318829#Magnaporthe_oryzae#loss_of_pathogenicity	No definition line	68.4211
MHUMG1_77231	82	5.15e-08	Q44135#PHI:8050#cpxA#715#Actinobacillus_pleuropneumoniae#reduced_virulence	No definition line	68.4211
MHUMG1_16731	13	5.67359e-06	Q8TGD1#PHI:254#FOW1#5507#Fusarium_oxysporum#reduced_virulence	No definition line	68.4211
MHUMG1_71501	2	2.27168e-95	I1S8E2#PHI:1606#GzOB047#5518#Fusarium_graminearum#reduced_virulence	No definition line	68.3983
MHUMG1_15491	304	0	G4MT25#PHI:5591#MoNIT4#318829#Magnaporthe_oryzae#unaffected_pathogenicity	No definition line	68.3962
MHUMG1_90941	10	0	I1S0J3#PHI:1526#GzHOMEL036#5518#Fusarium_graminearum#unaffected_pathogenicity	No definition line	68.3948
MHUMG1_80261	11	0	Q4WNW5#PHI:2970#argB#746128#Aspergillus_fumigatus#unaffected_pathogenicity	No definition line	68.3761
MHUMG1_16251	9	7.85847e-90	I1RKA4#PHI:2432#FgRgsA#5518#Fusarium_graminearum#reduced_virulence	No definition line	68.3333
MHUMG1_7261	28	5.57426e-91	Q4WMR3#PHI:2526#LUC7#746128#Aspergillus_fumigatus#lethal	No definition line	68.3168
MHUMG1_93421	62	0	Q9UW03#PHI:202__PHI:1160__PHI:2309#BcatrB#40559#Botrytis_cinerea#unaffected_pathogenicity__reduced_virulence__chemistry_target:_sensitivity_to_chemical	No definition line	68.2995
MHUMG1_15961	35	0	Q5EMY3#PHI:860#MSP1#318829#Magnaporthe_oryzae#reduced_virulence	No definition line	68.2692
MHUMG1_13071	13	0	I1S7I6#PHI:1429#GzC2H097#5518#Fusarium_graminearum#unaffected_pathogenicity	No definition line	68.2336
MHUMG1_105561	261	0	I1RB79#PHI:1249#FGSG_00786#5518#Fusarium_graminearum#unaffected_pathogenicity	No definition line	68.2316
MHUMG1_22341	5	4.44268e-141	I1RZM2#PHI:1318#GzBrom003#5518#Fusarium_graminearum#unaffected_pathogenicity	No definition line	68.1818
MHUMG1_13481	313	1.19476e-29	I1S9U4#PHI:1719#GzZC034#5518#Fusarium_graminearum#unaffected_pathogenicity	No definition line	68.1818
MHUMG1_85551	257	3.0945e-16	I1RYK8#PHI:1847#GzZC162#5518#Fusarium_graminearum#unaffected_pathogenicity	No definition line	68.1818
MHUMG1_73041	4	9.70654e-52	A0A0L9JQ40#PHI:6892#iscU#28901#Salmonella_enterica#reduced_virulence	No definition line	68.1416
MHUMG1_61611	257	0	I1RS57#PHI:1253#FGSG_06970#5518#Fusarium_graminearum#unaffected_pathogenicity	No definition line	68.1289
MHUMG1_101061	315	0	I1RSR7#PHI:1796#GzZC111#5518#Fusarium_graminearum#unaffected_pathogenicity	No definition line	68.059
MHUMG1_25411	321	0	I1RJY6#PHI:1707#GzZC022#5518#Fusarium_graminearum#unaffected_pathogenicity	No definition line	68
MHUMG1_78661	258	7.19026e-134	I1RQN6#PHI:1974#GzZC289#5518#Fusarium_graminearum#unaffected_pathogenicity	No definition line	68
MHUMG1_79551	8	0	I1RJD6#PHI:2408#FgMT1#5518#Fusarium_graminearum#unaffected_pathogenicity	No definition line	67.9842
MHUMG1_10671	11	0	P58371#PHI:2117#SPM1#318829#Magnaporthe_oryzae#reduced_virulence	No definition line	67.9612
MHUMG1_83121	7	0	I1RYF6#PHI:1597#GzOB037#5518#Fusarium_graminearum#unaffected_pathogenicity	No definition line	67.9566
MHUMG1_2771	69	0	F0XP73#PHI:2693#GcABC-G1#226899#Grosmannia_clavigera#reduced_virulence	No definition line	67.9479
MHUMG1_2181	9	0	Q4WK65#PHI:2639#Ilv3B#746128#Aspergillus_fumigatus#unaffected_pathogenicity__reduced_virulence	No definition line	67.8373
MHUMG1_71811	5	0	Q4WJ77#PHI:7654#aroB#746128#Aspergillus_fumigatus#reduced_virulence	No definition line	67.7582
MHUMG1_45441	4	2.48751e-103	G2XE04#PHI:7873#VdSec22#27337#Verticillium_dahliae#reduced_virulence	No definition line	67.757
MHUMG1_42051	13	0	I1RBF6#PHI:1565#GzOB005#5518#Fusarium_graminearum#unaffected_pathogenicity	No definition line	67.7536
MHUMG1_74541	10	0	M1W4B7#PHI:6266#cptRNA-ipt#5111#Claviceps_purpurea#reduced_virulence__loss_of_pathogenicity	No definition line	67.735
MHUMG1_50801	5	4.59319e-123	G9MQ09#PHI:8509#tex10#29875#Trichoderma_virens#increased_virulence_(hypervirulence)	No definition line	67.7291
MHUMG1_83941	31	2.42692e-129	Q32WF7#PHI:2269#Mdh1#13684#Parastagonospora_nodorum#unaffected_pathogenicity	No definition line	67.6692
MHUMG1_34871	6	4.72482e-38	Q4WJ77#PHI:7654#aroB#746128#Aspergillus_fumigatus#reduced_virulence	No definition line	67.6056
MHUMG1_16621	17	0	A0A098DK45#PHI:7123#Fgvps39#5518#Fusarium_graminearum#reduced_virulence	No definition line	67.5988
MHUMG1_79021	25	0	I1RP98#PHI:1621#GzRUM1#5518#Fusarium_graminearum#unaffected_pathogenicity	No definition line	67.5219
MHUMG1_103111	187	0	I1RSR1#PHI:1797#GzZC112#5518#Fusarium_graminearum#unaffected_pathogenicity	No definition line	67.4847
MHUMG1_62251	15	0	I1RC70#PHI:1303#GzbHLH004#5518#Fusarium_graminearum#unaffected_pathogenicity	No definition line	67.4556
MHUMG1_49081	46	1.63823e-66	Q6QIY0#PHI:2382#Upa2#5270#Ustilago_maydis#unaffected_pathogenicity	No definition line	67.4419
MHUMG1_27661	51	0	I1S0C1#PHI:1668#GzCCHC008#5518#Fusarium_graminearum#unaffected_pathogenicity	No definition line	67.4359
MHUMG1_20891	9	0	I1S828#PHI:1503#GzHMG035#5518#Fusarium_graminearum#unaffected_pathogenicity	No definition line	67.4352
MHUMG1_14041	2	0	Q4X146#PHI:2515#ALG7#746128#Aspergillus_fumigatus#lethal	No definition line	67.4208
MHUMG1_86361	263	1.11452e-17	I1RH59#PHI:1925#GzZC240#5518#Fusarium_graminearum#unaffected_pathogenicity	No definition line	67.3913
MHUMG1_19471	5	2.48491e-128	Q4P245#PHI:2239#Spe-Sdh#5270#Ustilago_maydis#reduced_virulence	No definition line	67.3469
MHUMG1_11641	5	0	I1RPZ1#PHI:1517#GzHOMEL013#5518#Fusarium_graminearum#lethal	No definition line	67.3432
MHUMG1_67331	254	0	I1RA39#PHI:1205#(Sc_CDC15)#5518#Fusarium_graminearum#reduced_virulence	No definition line	67.3421
MHUMG1_64241	4	2.08948e-148	G4MMH7#PHI:2115__PHI:4494#Annexin_A7__AnnA7#318829#Magnaporthe_oryzae#loss_of_pathogenicity__reduced_virulence	No definition line	67.2956
MHUMG1_29761	24	0	I1S231#PHI:1785#GzZC100#5518#Fusarium_graminearum#unaffected_pathogenicity	No definition line	67.2691
MHUMG1_91511	3	0	I1S0R5#PHI:5765__PHI:9049#ScOrtholog_NEM1__FgNem1_(FGSG_10302)#5518#Fusarium_graminearum#reduced_virulence	No definition line	67.1937
MHUMG1_23501	9	0	G4MLK2#PHI:8040__PHI:8047#Mouba2__Uba2#318829#Magnaporthe_oryzae#reduced_virulence	No definition line	67.1028
MHUMG1_51081	20	2.14724e-95	I1S8Y4#PHI:1338#GzbZIP020#5518#Fusarium_graminearum#unaffected_pathogenicity	No definition line	67.037
MHUMG1_26011	4	3.23458e-134	A9QUB2#PHI:2403#CSN1#169388#Fusarium_solani#increased_virulence_(hypervirulence)__reduced_virulence	No definition line	67.0068
MHUMG1_15951	5	6.46834e-43	I1RE60#PHI:1481#GzHMG013#5518#Fusarium_graminearum#unaffected_pathogenicity	No definition line	66.9811
MHUMG1_25291	7	0	Q4WZV9#PHI:6555#sF#746128#Aspergillus_fumigatus#unaffected_pathogenicity	No definition line	66.9497
MHUMG1_36591	12	1.67154e-149	A0A0D2XEI7#PHI:9050#FolVam7_(FOXG_02319)#5507#Fusarium_oxysporum#reduced_virulence	No definition line	66.9399
MHUMG1_67841	7	0	A0A0D2X9S0#PHI:7684#ntr1#5507#Fusarium_oxysporum#increased_virulence_(hypervirulence)	No definition line	66.9246
MHUMG1_21651	257	0	I1RJM8#PHI:1206#(Sp_Prp4)#5518#Fusarium_graminearum#reduced_virulence	No definition line	66.879
MHUMG1_9151	16	0	I1ZIN3#PHI:6209#BbCyp9#176275#Beauveria_bassiana#unaffected_pathogenicity	No definition line	66.8488
MHUMG1_68841	46	0	J5K3K8#PHI:7151#pmcA#176275#Beauveria_bassiana#reduced_virulence	No definition line	66.7472
MHUMG1_40251	7	0	G4ML12#PHI:6739#MoGls2#318829#Magnaporthe_oryzae#reduced_virulence	No definition line	66.7364
MHUMG1_54891	64	0	Q4WC58#PHI:3050#CHSF#746128#Aspergillus_fumigatus#reduced_virulence	No definition line	66.6963
MHUMG1_1541	12	0	Q6FSR7#PHI:3287#CgVps34#5478#Candida_glabrata#reduced_virulence	No definition line	66.6667
MHUMG1_14691	275	0	G4MT75#PHI:3312#gta1#318829#Magnaporthe_oryzae#reduced_virulence	No definition line	66.6667
MHUMG1_28691	262	0	G4MKH9#PHI:3310#Mocod1#318829#Magnaporthe_oryzae#reduced_virulence	No definition line	66.6667
MHUMG1_48211	262	0	I1RQ27#PHI:1914#GzZC229#5518#Fusarium_graminearum#unaffected_pathogenicity	No definition line	66.6667
MHUMG1_50351	338	0	I1RB90#PHI:1983#GzZC298#5518#Fusarium_graminearum#lethal	No definition line	66.6667
MHUMG1_55451	181	0	I1RCJ3#PHI:1351#GzC2H011#5518#Fusarium_graminearum#unaffected_pathogenicity	No definition line	66.6667
MHUMG1_74531	315	0	I1RXE8#PHI:1763#GzZC078#5518#Fusarium_graminearum#unaffected_pathogenicity	No definition line	66.6667
MHUMG1_83381	284	0	I1RY79#PHI:1943#GzZC258#5518#Fusarium_graminearum#unaffected_pathogenicity	No definition line	66.6667
MHUMG1_59101	2	2.21191e-135	G4MUW5#PHI:888#MGG_01707#318829#Magnaporthe_oryzae#reduced_virulence	No definition line	66.6667
MHUMG1_16341	267	1.03951e-103	I1RKB4#PHI:1953#GzZC268#5518#Fusarium_graminearum#unaffected_pathogenicity	No definition line	66.6667
MHUMG1_103851	228	2.86603e-102	I1RX74#PHI:1771#GzZC086#5518#Fusarium_graminearum#unaffected_pathogenicity	No definition line	66.6667
MHUMG1_70301	5	3.21433e-46	G4MYT5#PHI:3485#MoSPC3#318829#Magnaporthe_oryzae#unaffected_pathogenicity	No definition line	66.6667
MHUMG1_66051	12	1.08572e-24	Q6WER3#PHI:432__PHI:4212__PHI:4242#FGL1__Fgl1#5518#Fusarium_graminearum#reduced_virulence	No definition line	66.6667
MHUMG1_7731	5	1.22528e-22	I1RN03#PHI:1372#GzC2H035#5518#Fusarium_graminearum#unaffected_pathogenicity	No definition line	66.6667
MHUMG1_5191	126	2.83959e-20	A5F6S0#PHI:4108#fadD#666#Vibrio_cholerae#reduced_virulence__unaffected_pathogenicity	No definition line	66.6667
MHUMG1_27941	8	5.11848e-20	G4MVC5#PHI:6927#MoRAD6#318829#Magnaporthe_oryzae#reduced_virulence	No definition line	66.6667
MHUMG1_6581	7	8.02413e-19	Q5ANH2#PHI:6660#CaArv1#5476#Candida_albicans#loss_of_pathogenicity	No definition line	66.6667
MHUMG1_8441	99	2.45059e-18	A5F6S0#PHI:4108#fadD#666#Vibrio_cholerae#reduced_virulence__unaffected_pathogenicity	No definition line	66.6667
MHUMG1_13571	9	3.88916e-16	J5JHE8#PHI:7377#Blys4#176275#Beauveria_bassiana#unaffected_pathogenicity	No definition line	66.6667
MHUMG1_92511	31	1.00087e-11	Q59VH7#PHI:480#SAP7#5476#Candida_albicans#unaffected_pathogenicity__reduced_virulence	No definition line	66.6667
MHUMG1_52111	43	1.99965e-06	E9QY26#PHI:2535#ERG11B#746128#Aspergillus_fumigatus#lethal__unaffected_pathogenicity__loss_of_pathogenicity	No definition line	66.6667
MHUMG1_84431	8	0	C6ZRH8#PHI:2976#CgOPT1#474922#Colletotrichum_gloeosporioides#reduced_virulence	No definition line	66.6191
MHUMG1_71241	7	1.42168e-94	G4NCG1#PHI:3234#MoLYS20#318829#Magnaporthe_oryzae#reduced_virulence	No definition line	66.5072
MHUMG1_65041	5	0	I1RAM0#PHI:7125#FgKar9#5518#Fusarium_graminearum#unaffected_pathogenicity	No definition line	66.4876
MHUMG1_41301	7	9.46203e-106	W7LTJ2#PHI:7146#FvHEX1#117187#Fusarium_verticillioides#unaffected_pathogenicity	No definition line	66.4773
MHUMG1_24831	15	0	O59928#PHI:144#CHT42#29875#Trichoderma_virens#reduced_virulence	No definition line	66.4336
MHUMG1_48411	2	4.59991e-114	G4N008#PHI:5395#MoSec62#318829#Magnaporthe_oryzae#reduced_virulence	No definition line	66.4
MHUMG1_1711	251	0	I1RJS7#PHI:1902#GzZC217#5518#Fusarium_graminearum#unaffected_pathogenicity	No definition line	66.3793
MHUMG1_41351	16	0	I1RB03#PHI:7559#FgGT2#5518#Fusarium_graminearum#loss_of_pathogenicity	No definition line	66.3717
MHUMG1_9031	295	4.05538e-51	Q4P9P1#PHI:2237#Rbf1#5270#Ustilago_maydis#loss_of_pathogenicity	No definition line	66.3551
MHUMG1_77641	14	9.22164e-145	I1RYI2#PHI:3373#FgSho1#5518#Fusarium_graminearum#reduced_virulence	No definition line	66.343
MHUMG1_62881	20	3.28589e-143	I1RC01#PHI:1506#GzHOME001#5518#Fusarium_graminearum#unaffected_pathogenicity	No definition line	66.3265
MHUMG1_12711	8	0	I1RRR9#PHI:1457#GzAra005#5518#Fusarium_graminearum#unaffected_pathogenicity	No definition line	66.3102
MHUMG1_38371	12	1.00965e-163	F5HCK8#PHI:415#IPMDH#13684#Parastagonospora_nodorum#loss_of_pathogenicity	No definition line	66.3014
MHUMG1_33451	3	0	I1RQL1#PHI:1451#GzGH#5518#Fusarium_graminearum#unaffected_pathogenicity	No definition line	66.2484
MHUMG1_43931	5	0	G4N703#PHI:2081#Moatg15#318829#Magnaporthe_oryzae#loss_of_pathogenicity	No definition line	66.242
MHUMG1_64661	5	9.69991e-37	G4NEF1#PHI:805#MGG_00124#318829#Magnaporthe_oryzae#reduced_virulence	No definition line	66.2338
MHUMG1_80241	2	0	I1RQD8#PHI:1614#GzSART1#5518#Fusarium_graminearum#unaffected_pathogenicity	No definition line	66.1562
MHUMG1_41841	18	1.69103e-145	Q4WJS6#PHI:6753#GlcA#746128#Aspergillus_fumigatus#lethal	No definition line	66.1017
MHUMG1_25941	4	5.32155e-103	Q4WGN8#PHI:8590#met8_(AFUA_7G05680)#746128#Aspergillus_fumigatus#reduced_virulence__unaffected_pathogenicity	No definition line	66.087
MHUMG1_45871	7	3.049e-157	I1RMR8#PHI:1516#GzHOMEL012#5518#Fusarium_graminearum#lethal	No definition line	66.0848
MHUMG1_6611	6	0	A0A290WFK0#PHI:7709#VEDA_05199#27337#Verticillium_dahliae#reduced_virulence__unaffected_pathogenicity	No definition line	66.0622
MHUMG1_27841	16	5.22053e-156	Q4R1B9#PHI:2065#MSTU1#318829#Magnaporthe_oryzae#loss_of_pathogenicity	No definition line	66.055
MHUMG1_24401	20	0	I1S282#PHI:1452#GzHSF003#5518#Fusarium_graminearum#unaffected_pathogenicity	No definition line	65.9735
MHUMG1_3721	9	0	F5HAA8#PHI:424#PCK1#5207#Cryptococcus_neoformans#reduced_virulence	No definition line	65.8696
MHUMG1_18231	54	1.85754e-140	Q4WQ36#PHI:6751#Fbx23#746128#Aspergillus_fumigatus#increased_virulence_(hypervirulence)	No definition line	65.8537
MHUMG1_65421	6	1.98188e-175	J4KLZ9#PHI:7155#pmr1#176275#Beauveria_bassiana#reduced_virulence	No definition line	65.8371
MHUMG1_54721	8	1.01518e-164	G4MUG1#PHI:8039__PHI:8046#Moaos1__Aos1#318829#Magnaporthe_oryzae#reduced_virulence	No definition line	65.812
MHUMG1_8651	18	5.52232e-169	A0MAR2#PHI:2858#FvVE1#117187#Fusarium_verticillioides#loss_of_pathogenicity	No definition line	65.8065
MHUMG1_91341	11	0	Q4WYU7#PHI:2528#SLY1#746128#Aspergillus_fumigatus#lethal	No definition line	65.7858
MHUMG1_13381	254	0	I1RP15#PHI:1252#FGSG_05764#5518#Fusarium_graminearum#unaffected_pathogenicity	No definition line	65.7799
MHUMG1_3271	125	4.13589e-129	I1S8F7#PHI:1820#GzZC135#5518#Fusarium_graminearum#unaffected_pathogenicity	No definition line	65.7534
MHUMG1_5741	106	0	I1RYQ5#PHI:1246#FGSG_09513#5518#Fusarium_graminearum#unaffected_pathogenicity	No definition line	65.752
MHUMG1_38671	3	1.85994e-146	M1RXP4#PHI:4165#ALG3#318829#Magnaporthe_oryzae#reduced_virulence	No definition line	65.6891
MHUMG1_15861	19	0	A0A0C4DHR8#PHI:7682#nit1#5507#Fusarium_oxysporum#unaffected_pathogenicity	No definition line	65.6734
MHUMG1_72421	14	1.38006e-105	I1RNI6#PHI:1309#GzbHLH010#5518#Fusarium_graminearum#lethal	No definition line	65.6442
MHUMG1_52351	255	0	I1RQN6#PHI:1974#GzZC289#5518#Fusarium_graminearum#unaffected_pathogenicity	No definition line	65.625
MHUMG1_19441	36	1.08848e-54	I1RZY2#PHI:1556#GzNH001#5518#Fusarium_graminearum#reduced_virulence	No definition line	65.625
MHUMG1_83421	24	6.91292e-124	I1RLS1#PHI:1369#GzC2H031#5518#Fusarium_graminearum#unaffected_pathogenicity	No definition line	65.6051
MHUMG1_19251	12	0	I1RZR4#PHI:8924#FgPLD1_(FGSG_09917)#5518#Fusarium_graminearum#reduced_virulence	No definition line	65.5633
MHUMG1_42141	20	1.35794e-67	A0A0G4J7R2#PHI:7735#PbCYP3#318829#Magnaporthe_oryzae#reduced_virulence	No definition line	65.5405
MHUMG1_15471	234	0	A8QJI7#PHI:1020__PHI:1022__PHI:2362#XlnR__XLNR#5507#Fusarium_oxysporum#unaffected_pathogenicity	No definition line	65.5172
MHUMG1_87071	68	3.15996e-94	Q9UW87#PHI:267#MLT1#5476#Candida_albicans#reduced_virulence	No definition line	65.5172
MHUMG1_48071	298	0	I1RMD1#PHI:1958#GzZC273#5518#Fusarium_graminearum#unaffected_pathogenicity	No definition line	65.4602
MHUMG1_38551	10	1.62031e-23	I1RMT3#PHI:1664#GzCCHC004#5518#Fusarium_graminearum#unaffected_pathogenicity	No definition line	65.3846
MHUMG1_80441	105	9.94201e-14	Q9I4X3#PHI:3291__PHI:5563__PHI:5585#pqsA#287#Pseudomonas_aeruginosa#reduced_virulence	No definition line	65.3846
MHUMG1_29541	10	0	I1S216#PHI:1605#GzOB046#5518#Fusarium_graminearum#unaffected_pathogenicity	No definition line	65.3641
MHUMG1_102631	71	1.16555e-81	Q5AND9#PHI:7009#arf2#5476#Candida_albicans#reduced_virulence	No definition line	65.3631
MHUMG1_63351	252	0	I1RC35#PHI:1219#FGSG_01137#5518#Fusarium_graminearum#lethal	No definition line	65.2809
MHUMG1_54851	4	1.00503e-68	G4MRN1#PHI:7318#noxD#318829#Magnaporthe_oryzae#loss_of_pathogenicity	No definition line	65.2482
MHUMG1_6251	3	2.68881e-108	G4MVK9#PHI:5017#MoPEX11A#318829#Magnaporthe_oryzae#reduced_virulence	No definition line	65.2361
MHUMG1_74331	412	3.18521e-17	I1RJY6#PHI:1707#GzZC022#5518#Fusarium_graminearum#unaffected_pathogenicity	No definition line	65.2174
MHUMG1_82641	15	1.37719e-08	Q945U0#PHI:652#GIP1#67593#Phytophthora_sojae#effector_(plant_avirulence_determinant)	No definition line	65.2174
MHUMG1_32251	7	0	I1RPU1#PHI:1297#GzAT001#5518#Fusarium_graminearum#reduced_virulence	No definition line	65.1982
MHUMG1_21671	253	0	I1RJM9#PHI:1221#FGSG_04054#5518#Fusarium_graminearum#lethal	No definition line	65.1515
MHUMG1_33981	18	0	A0A0D2XVZ5#PHI:5236#Dnj1#5507#Fusarium_oxysporum#reduced_virulence	No definition line	65.1316
MHUMG1_7121	10	0	I1RQS8#PHI:1379#GzC2H042#5518#Fusarium_graminearum#reduced_virulence	No definition line	65.1292
MHUMG1_46421	17	0	G4NF65#PHI:3061__PHI:4055#MoRga1__Rga1#318829#Magnaporthe_oryzae#unaffected_pathogenicity	No definition line	65.0957
MHUMG1_24451	45	3.12389e-82	Q96VL3#PHI:339#CLPT1#290576#Colletotrichum_lindemuthianum#reduced_virulence	No definition line	65.0888
MHUMG1_1691	19	0	I1RJS9#PHI:2326__PHI:2491__PHI:5720#PTC1__FgPTC1__ScOrtholog_PTC1#5518#Fusarium_graminearum#reduced_virulence__unaffected_pathogenicity	No definition line	65.0624
MHUMG1_13511	109	1.29506e-142	I1RJE8#PHI:721#GRS1#5518#Fusarium_graminearum#unaffected_pathogenicity	No definition line	65
MHUMG1_29721	141	1.27781e-112	I1S1A5#PHI:1755#GzZC070#5518#Fusarium_graminearum#unaffected_pathogenicity	No definition line	65
MHUMG1_9021	33	8.14752e-44	I1RC95#PHI:1566#GzOB006#5518#Fusarium_graminearum#lethal	No definition line	65
MHUMG1_94671	171	2.8015e-36	Q4I0C5#PHI:1764#GzZC079#5518#Fusarium_graminearum#unaffected_pathogenicity	No definition line	65
MHUMG1_35111	264	5.78578e-17	I1RH59#PHI:1925#GzZC240#5518#Fusarium_graminearum#unaffected_pathogenicity	No definition line	65
MHUMG1_30651	20	2.60496e-09	J9VMG2#PHI:4883#Kcs1#5207#Cryptococcus_neoformans#reduced_virulence__loss_of_pathogenicity	No definition line	65
MHUMG1_90761	14	0	Q4WTH5#PHI:4471#PtcB#746128#Aspergillus_fumigatus#loss_of_pathogenicity	No definition line	64.9758
MHUMG1_55531	20	0	G4N7U7#PHI:8629#MoAbp1_(MGG_06358)#318829#Magnaporthe_oryzae#reduced_virulence	No definition line	64.9281
MHUMG1_18731	11	7.00369e-140	A7F946#PHI:2411#Ss-ggt1#5180#Sclerotinia_sclerotiorum#reduced_virulence	No definition line	64.8936
MHUMG1_15551	8	7.47654e-105	I1RE92#PHI:1097#FGSG_01974#5518#Fusarium_graminearum#reduced_virulence	No definition line	64.8889
MHUMG1_24851	255	0	I1S1V3#PHI:1238#FGSG_10725#5518#Fusarium_graminearum#lethal	No definition line	64.878
MHUMG1_42641	10	7.12219e-156	I1RBK8#PHI:1619#GzJUM001#5518#Fusarium_graminearum#unaffected_pathogenicity	No definition line	64.8649
MHUMG1_30431	32	7.00897e-149	A4QTE3#PHI:8927#MoSCAD1_(MGG_05096)#318829#Magnaporthe_oryzae#reduced_virulence__loss_of_pathogenicity	No definition line	64.8649
MHUMG1_95581	13	0	I1S368#PHI:6127#PLC#5518#Fusarium_graminearum#unaffected_pathogenicity	No definition line	64.7841
MHUMG1_57911	57	0	I1RFY9#PHI:1357#GzC2H017#5518#Fusarium_graminearum#unaffected_pathogenicity	No definition line	64.7799
MHUMG1_96641	27	1.35814e-124	A7F6T5#PHI:7696#THR1#5180#Sclerotinia_sclerotiorum#unaffected_pathogenicity	No definition line	64.7727
MHUMG1_35261	17	0	G4MZ47#PHI:2105#Calcium_permease#318829#Magnaporthe_oryzae#unaffected_pathogenicity__reduced_virulence	No definition line	64.7619
MHUMG1_14201	4	4.15866e-125	Q4WVS3#PHI:7652#aroC#746128#Aspergillus_fumigatus#reduced_virulence	No definition line	64.7273
MHUMG1_4711	17	0	G4N6W1#PHI:5659#FZC61#318829#Magnaporthe_oryzae#unaffected_pathogenicity	No definition line	64.7059
MHUMG1_10001	105	0	G4NDE1#PHI:1017__PHI:2067#ABC4#318829#Magnaporthe_oryzae#reduced_virulence__loss_of_pathogenicity	No definition line	64.7059
MHUMG1_16151	65	0	I1RK94#PHI:1367#GzC2H028#5518#Fusarium_graminearum#unaffected_pathogenicity	No definition line	64.7059
MHUMG1_85641	17	1.82239e-148	I1REN7#PHI:1681#GzNF001#5518#Fusarium_graminearum#unaffected_pathogenicity	No definition line	64.7059
MHUMG1_29211	104	1.34601e-92	I1S2J9#PHI:3924__PHI:8224__PHI:9036#FgABC1__Fg10995__fgm5_(FGSG_10995)#5518#Fusarium_graminearum#reduced_virulence	No definition line	64.7059
MHUMG1_63781	70	1.51394e-89	A0A1C3YI15#PHI:5833#Fgsg00994#5518#Fusarium_graminearum#unaffected_pathogenicity	No definition line	64.7059
MHUMG1_37421	41	1.19338e-86	J4USC3#PHI:6471#Trr2#176275#Beauveria_bassiana#reduced_virulence	No definition line	64.7059
MHUMG1_16491	7	4.04067e-80	Q4WKJ9#PHI:2546#BRX1#746128#Aspergillus_fumigatus#lethal	No definition line	64.7059
MHUMG1_42571	15	3.39206e-61	I1RIS2#PHI:5353#Famfs1#282267#Fusarium_asiaticum#reduced_virulence	No definition line	64.7059
MHUMG1_47431	119	5.65128e-24	C4YFX2#PHI:211__PHI:6806#CaTUP1__tup1#5476#Candida_albicans#reduced_virulence	No definition line	64.7059
MHUMG1_99461	94	5.89346e-22	Q2I0M6#PHI:1051#CTB3#29003#Cercospora_nicotianae#reduced_virulence	No definition line	64.7059
MHUMG1_26351	8	1.31847e-10	I1SA30#PHI:1436#GzC2H105#5518#Fusarium_graminearum#reduced_virulence	No definition line	64.7059
MHUMG1_29091	44	3.05901e-07	G4N532#PHI:5690#FZC85#318829#Magnaporthe_oryzae#unaffected_pathogenicity	No definition line	64.7059
MHUMG1_71951	16	0	Q4IB89#PHI:1224#FGSG_05519#5518#Fusarium_graminearum#lethal	No definition line	64.6957
MHUMG1_81681	6	2.28127e-130	G4N6R6#PHI:7113#MoERR2#318829#Magnaporthe_oryzae#unaffected_pathogenicity	No definition line	64.6104
MHUMG1_78341	14	3.93861e-16	P95830#PHI:6986#DnaJ#1313#Streptococcus_pneumoniae#reduced_virulence	No definition line	64.5833
MHUMG1_65351	26	0	I1RAI5#PHI:1319#GzbZIP001#5518#Fusarium_graminearum#reduced_virulence	No definition line	64.5631
MHUMG1_86371	10	0	I1RZZ3#PHI:2728#FgERG4#5518#Fusarium_graminearum#reduced_virulence	No definition line	64.5455
MHUMG1_44241	297	2.83299e-24	G4N2A1#PHI:5601#FZC11#318829#Magnaporthe_oryzae#unaffected_pathogenicity	No definition line	64.5161
MHUMG1_34391	3	0	W7N0U7#PHI:7145#FvSEL1#117187#Fusarium_verticillioides#reduced_virulence	No definition line	64.5084
MHUMG1_18951	7	0	Q876Z6#PHI:375#REN1#5507#Fusarium_oxysporum#unaffected_pathogenicity	No definition line	64.4231
MHUMG1_55811	223	0	I1RCM6#PHI:1273#FGSG_01347#5518#Fusarium_graminearum#unaffected_pathogenicity	No definition line	64.3958
MHUMG1_7801	11	0	I1RN13#PHI:1010#SID1#5518#Fusarium_graminearum#reduced_virulence	No definition line	64.381
MHUMG1_92751	18	0	A0A0J9ULI2#PHI:7683#nit2#5507#Fusarium_oxysporum#unaffected_pathogenicity	No definition line	64.3612
MHUMG1_97501	58	0	Q96WW9#PHI:258#GPABC1#5128#Fusarium_sambucinum#reduced_virulence	No definition line	64.3436
MHUMG1_15781	7	3.29461e-74	I1RE76#PHI:1571#GzOB011#5518#Fusarium_graminearum#unaffected_pathogenicity	No definition line	64.3275
MHUMG1_17461	11	0	Q9C1T0#PHI:200#ARG1#5507#Fusarium_oxysporum#reduced_virulence	No definition line	64.2857
MHUMG1_12311	14	1.54618e-138	I1RSA6#PHI:1488#GzHMG020#5518#Fusarium_graminearum#unaffected_pathogenicity	No definition line	64.2857
MHUMG1_46331	14	3.35206e-26	Q2KNE4#PHI:3881#LaeA#5059#Aspergillus_flavus#reduced_virulence	No definition line	64.2857
MHUMG1_81881	4	2.48673e-15	P01555#PHI:698#CtxA#666#Vibrio_cholerae#reduced_virulence	No definition line	64.2857
MHUMG1_88391	137	2.3132e-10	I1RMD1#PHI:1958#GzZC273#5518#Fusarium_graminearum#unaffected_pathogenicity	No definition line	64.2857
MHUMG1_54011	21	0	G2X6V8#PHI:6331#VdCYP1#27337#Verticillium_dahliae#loss_of_pathogenicity	No definition line	64.2276
MHUMG1_47191	13	1.4209e-118	Q4X1I3#PHI:2545#TIF35#746128#Aspergillus_fumigatus#lethal	No definition line	64.2105
MHUMG1_31671	11	0	Q2KN79#PHI:522__PHI:2808#GAS1__gas1#5507#Fusarium_oxysporum#reduced_virulence	No definition line	64.2045
MHUMG1_52781	9	2.41869e-69	Q51LD2#PHI:2071#Moatg3#318829#Magnaporthe_oryzae#loss_of_pathogenicity	No definition line	64.2045
MHUMG1_62161	66	5.19464e-77	Q5AMP3#PHI:7011#arl1#5476#Candida_albicans#reduced_virulence	No definition line	64.1711
MHUMG1_851	5	1.83343e-110	B3GXB6#PHI:7075#pdxS#715#Actinobacillus_pleuropneumoniae#reduced_virulence	No definition line	64.1379
MHUMG1_3231	12	0	Q5XTQ5#PHI:538#FRT1#40559#Botrytis_cinerea#unaffected_pathogenicity	No definition line	64.0884
MHUMG1_8821	12	1.02448e-159	I1RCX3#PHI:1540#GzMyb004#5518#Fusarium_graminearum#unaffected_pathogenicity	No definition line	64.0244
MHUMG1_81701	5	9.67888e-74	Q70ZY8#PHI:2524#nudC#746128#Aspergillus_fumigatus#lethal	No definition line	64.0244
MHUMG1_61971	260	0	I1RS33#PHI:1250#FGSG_06940#5518#Fusarium_graminearum#unaffected_pathogenicity	No definition line	64.0152
MHUMG1_38041	255	0	I1RRH8#PHI:1892#GzZC207#5518#Fusarium_graminearum#unaffected_pathogenicity	No definition line	64
MHUMG1_19071	3	3.01398e-76	G4ND53#PHI:4084#MoPex19#318829#Magnaporthe_oryzae#loss_of_pathogenicity	No definition line	63.9831
MHUMG1_1901	199	0	I1RG87#PHI:1358#GzC2H018#5518#Fusarium_graminearum#unaffected_pathogenicity	No definition line	63.9616
MHUMG1_61551	5	0	G4N549#PHI:7273#Pmp1#318829#Magnaporthe_oryzae#reduced_virulence__unaffected_pathogenicity	No definition line	63.9594
MHUMG1_15251	7	6.98693e-82	I1RMV4#PHI:1464__PHI:8923#GzCCAAT004__FgHLTF1_(FGSG_05304)#5518#Fusarium_graminearum#reduced_virulence	No definition line	63.9594
MHUMG1_90081	272	1.22694e-137	I1RS48#PHI:1202#(Sc_Cla4)#5518#Fusarium_graminearum#reduced_virulence	No definition line	63.9498
MHUMG1_52321	133	0	G5EI34#PHI:3019#MoLys2#318829#Magnaporthe_oryzae#reduced_virulence	No definition line	63.9273
MHUMG1_50871	9	1.92246e-34	I1RWL9#PHI:1079#Pls1#5518#Fusarium_graminearum#unaffected_pathogenicity	No definition line	63.8889
MHUMG1_38531	35	1.88296e-109	I1RMT2#PHI:1940#GzZC255#5518#Fusarium_graminearum#unaffected_pathogenicity	No definition line	63.8298
MHUMG1_17191	60	1.60475e-107	T0LLS6#PHI:6703#CgRhoB#474922#Colletotrichum_gloeosporioides#reduced_virulence	No definition line	63.8132
MHUMG1_52881	8	0	I1RX64#PHI:1407#GzC2H071#5518#Fusarium_graminearum#lethal	No definition line	63.7956
MHUMG1_37041	11	6.79277e-30	I1RU55#PHI:1391#GzC2H054#5518#Fusarium_graminearum#unaffected_pathogenicity	No definition line	63.7363
MHUMG1_16131	9	0	N4V0R3#PHI:3278#CoIra1#5465#Colletotrichum_orbiculare#reduced_virulence	No definition line	63.7333
MHUMG1_95041	14	1.72833e-164	P29138#PHI:4615#Pr1#5530#Metarhizium_anisopliae#unaffected_pathogenicity	No definition line	63.7143
MHUMG1_55961	14	0	I1RCP1#PHI:1080#Cch1#5518#Fusarium_graminearum#unaffected_pathogenicity	No definition line	63.7051
MHUMG1_60611	13	6.69603e-63	I1RSY2#PHI:1588#GzOB028#5518#Fusarium_graminearum#lethal	No definition line	63.7037
MHUMG1_41661	6	2.01723e-156	G4N6Q1#PHI:2074#Moatg6#318829#Magnaporthe_oryzae#loss_of_pathogenicity	No definition line	63.6816
MHUMG1_5201	11	2.03412e-180	W7LS89#PHI:6262#FUG1#117187#Fusarium_verticillioides#reduced_virulence	No definition line	63.6522
MHUMG1_36391	144	0	Q6ZX14#PHI:325#ACE1#318829#Magnaporthe_oryzae#effector_(plant_avirulence_determinant)	No definition line	63.6364
MHUMG1_52151	122	2.22716e-109	Q96VB5#PHI:508#AFT1#5599#Alternaria_alternata#loss_of_pathogenicity	No definition line	63.6364
MHUMG1_29831	118	3.47825e-76	Q874F3#PHI:391#ABC2#318829#Magnaporthe_oryzae#unaffected_pathogenicity	No definition line	63.6364
MHUMG1_94471	259	2.94381e-65	I1RKS9#PHI:1701#GzZC016#5518#Fusarium_graminearum#unaffected_pathogenicity	No definition line	63.6364
MHUMG1_2151	11	8.35864e-49	Q8Y8N0#PHI:6510__PHI:7620#CshA__Lmo0866#1639#Listeria_monocytogenes#unaffected_pathogenicity__increased_virulence_(hypervirulence)	No definition line	63.6364
MHUMG1_3511	14	8.6837e-07	A8YPQ5#PHI:7004#CapB2#1280#Staphylococcus_aureus#reduced_virulence	No definition line	63.6364
MHUMG1_15431	35	0	P43098#PHI:96#FAS2#5476#Candida_albicans#loss_of_pathogenicity	No definition line	63.6316
MHUMG1_16771	8	2.36636e-140	I1RKF3#PHI:2418__PHI:2419#CID1#5518#Fusarium_graminearum#reduced_virulence	No definition line	63.4675
MHUMG1_38541	5	2.20966e-41	Q9P470#PHI:257#GAS2#318829#Magnaporthe_oryzae#reduced_virulence	No definition line	63.4146
MHUMG1_30561	104	0	W5ZQ93#PHI:3417#Ohmm#176275#Beauveria_bassiana#increased_virulence_(hypervirulence)	No definition line	63.3634
MHUMG1_26091	2	0	Q4WJ71#PHI:2539#CDS1#746128#Aspergillus_fumigatus#lethal	No definition line	63.3406
MHUMG1_9471	16	0	I1RD69#PHI:1620#GzJUM002#5518#Fusarium_graminearum#unaffected_pathogenicity	No definition line	63.3333
MHUMG1_69341	6	0	I1RTB9#PHI:1644#GzRFX1#5518#Fusarium_graminearum#unaffected_pathogenicity	No definition line	63.3065
MHUMG1_20561	8	0	I1RRU8#PHI:1622#GzJUM004#5518#Fusarium_graminearum#unaffected_pathogenicity	No definition line	63.2444
MHUMG1_102051	42	2.67186e-50	I1RGC9#PHI:1359#GzC2H019#5518#Fusarium_graminearum#unaffected_pathogenicity	No definition line	63.2184
MHUMG1_38181	93	6.03289e-168	Q4X1Y0#PHI:2514#PFS2#746128#Aspergillus_fumigatus#lethal	No definition line	63.198
MHUMG1_50451	7	7.64233e-75	Q96TN6#PHI:256#GAS1#318829#Magnaporthe_oryzae#reduced_virulence	No definition line	63.1841
MHUMG1_38221	356	0	I1RRG4#PHI:1380#GzC2H043#5518#Fusarium_graminearum#unaffected_pathogenicity	No definition line	63.1808
MHUMG1_84591	253	5.77807e-121	I1RTL1#PHI:1245#FGSG_07520#5518#Fusarium_graminearum#unaffected_pathogenicity	No definition line	63.1579
MHUMG1_84301	187	9.02124e-93	I1RFK9#PHI:1269#FGSG_02488#5518#Fusarium_graminearum#unaffected_pathogenicity	No definition line	63.1579
MHUMG1_16511	7	2.50776e-91	W7MNK7#PHI:7147#FvPEX14#117187#Fusarium_verticillioides#unaffected_pathogenicity	No definition line	63.1579
MHUMG1_12851	35	4.99531e-51	I1RC95#PHI:1566#GzOB006#5518#Fusarium_graminearum#lethal	No definition line	63.1579
MHUMG1_351	9	3.57591e-43	G4MS40#PHI:811#MGG_10510#318829#Magnaporthe_oryzae#reduced_virulence	No definition line	63.1579
MHUMG1_5281	5	4.57149e-43	B2SI02#PHI:1139#raxQ#347#Xanthomonas_oryzae#increased_virulence_(hypervirulence)	No definition line	63.1579
MHUMG1_17481	23	8.04231e-43	A0A075TRB3#PHI:3301#patN#27334#Penicillium_expansum#unaffected_pathogenicity	No definition line	63.1579
MHUMG1_61091	2	9.14585e-20	G4N4U0#PHI:887#MGG_05174#318829#Magnaporthe_oryzae#reduced_virulence	No definition line	63.1579
MHUMG1_75271	44	7.02101e-16	I1RUC7#PHI:1260#FGSG_07816#5518#Fusarium_graminearum#unaffected_pathogenicity	No definition line	63.1579
MHUMG1_31651	94	1.92861e-11	W9B5Y9#PHI:7541#FepC_(VK055_1930)#573#Klebsiella_pneumoniae#reduced_virulence	No definition line	63.1579
MHUMG1_56401	8	2.7178e-11	E9DS54#PHI:8769#MaPpt1#92637#Metarhizium_acridum#unaffected_pathogenicity	No definition line	63.1579
MHUMG1_25521	106	6.27724e-11	B2SRG1#PHI:1141#raxB#347#Xanthomonas_oryzae#increased_virulence_(hypervirulence)	No definition line	63.1579
MHUMG1_23481	33	8.35296e-11	A0A164J6A6#PHI:6447#rarA#573#Klebsiella_pneumoniae#reduced_virulence	No definition line	63.1579
MHUMG1_26311	15	8.08126e-07	G2XEQ5#PHI:7190#VDAG_08640#27337#Verticillium_dahliae#unaffected_pathogenicity	No definition line	63.1579
MHUMG1_50241	39	4.80606e-114	G4MWK9#PHI:8929#MoSCAD3_(MGG_01180)#318829#Magnaporthe_oryzae#reduced_virulence	No definition line	63.1179
MHUMG1_39011	4	0	I1RR94#PHI:6122__PHI:5741#FGSG_06610__ScOrtholog_YKL153W#5518#Fusarium_graminearum#reduced_virulence	No definition line	63.0265
MHUMG1_10171	5	2.42632e-35	Q4HTT1#PHI:1468#GzCCAAT008#5518#Fusarium_graminearum#unaffected_pathogenicity	No definition line	63
MHUMG1_76511	302	8.0036e-175	I1R9R2#PHI:1996#GzZC311#5518#Fusarium_graminearum#unaffected_pathogenicity	No definition line	62.963
MHUMG1_91671	18	2.62642e-58	A0A0G4J7R2#PHI:7735#PbCYP3#318829#Magnaporthe_oryzae#reduced_virulence	No definition line	62.8931
MHUMG1_96651	7	3.03e-73	A7F6T4#PHI:7695#SCD1#5180#Sclerotinia_sclerotiorum#unaffected_pathogenicity	No definition line	62.8743
MHUMG1_17241	3	3.346e-88	G4NCA2#PHI:2016#PTH2#318829#Magnaporthe_oryzae#loss_of_pathogenicity	No definition line	62.8205
MHUMG1_101911	70	0	I1RGE1#PHI:4042#spt8#5518#Fusarium_graminearum#reduced_virulence	No definition line	62.8131
MHUMG1_4841	50	0	I1RWW4#PHI:1331__PHI:3111__PHI:4023#GzbZIP013__FgAP1__Fgap1#5518#Fusarium_graminearum#unaffected_pathogenicity	No definition line	62.7986
MHUMG1_64771	6	0	G4MKY1#PHI:7991#PoVps9_(MGG_05379)__PoVps9#318829#Magnaporthe_oryzae#reduced_virulence__loss_of_pathogenicity	No definition line	62.7164
MHUMG1_28661	9	0	I1REJ1#PHI:1662#GzCCHC002#5518#Fusarium_graminearum#unaffected_pathogenicity	No definition line	62.7151
MHUMG1_4291	29	3.11229e-177	I1RVY6#PHI:1401#GzC2H064#5518#Fusarium_graminearum#unaffected_pathogenicity	No definition line	62.6126
MHUMG1_9621	3	4.53269e-127	N4VSY8#PHI:5111#FAM1#5465#Colletotrichum_orbiculare#loss_of_pathogenicity	No definition line	62.5917
MHUMG1_64111	348	1.17936e-78	I1RBT2#PHI:1347#GzC2H007#5518#Fusarium_graminearum#reduced_virulence	No definition line	62.5616
MHUMG1_7901	76	0	Q9C1I7#PHI:310#MgAtr4#1047171#Zymoseptoria_tritici#reduced_virulence	No definition line	62.5168
MHUMG1_13931	319	0	I1RYY1#PHI:1757#GzZC072#5518#Fusarium_graminearum#unaffected_pathogenicity	No definition line	62.5
MHUMG1_20721	198	0	I1RRX1#PHI:1382#GzC2H045#5518#Fusarium_graminearum#reduced_virulence	No definition line	62.5
MHUMG1_74611	50	0	Q9C2Y4#PHI:405#PDE1#318829#Magnaporthe_oryzae#reduced_virulence	No definition line	62.5
MHUMG1_39621	67	2.71212e-180	Q4IA62#PHI:1674#GzDHHC002#5518#Fusarium_graminearum#unaffected_pathogenicity	No definition line	62.5
MHUMG1_23751	258	4.029e-88	I1S2A9#PHI:1784#GzZC099#5518#Fusarium_graminearum#unaffected_pathogenicity	No definition line	62.5
MHUMG1_84641	14	1.44431e-39	Q5K8R6#PHI:2822#Cxt1p#5207#Cryptococcus_neoformans#reduced_virulence	No definition line	62.5
MHUMG1_68451	245	5.76462e-39	F5B5Y4#PHI:6206#BbCypC#176275#Beauveria_bassiana#unaffected_pathogenicity	No definition line	62.5
MHUMG1_64731	226	1.44685e-37	G4MNN4#PHI:3314#cca1#318829#Magnaporthe_oryzae#loss_of_pathogenicity	No definition line	62.5
MHUMG1_3001	21	1.48774e-35	Q2KNE4#PHI:3881#LaeA#5059#Aspergillus_flavus#reduced_virulence	No definition line	62.5
MHUMG1_60111	16	1.65892e-30	A0A016PTV5#PHI:5393#GLX#5518#Fusarium_graminearum#reduced_virulence	No definition line	62.5
MHUMG1_62611	4	2.40709e-19	K8DPN9#PHI:4584#FkpA#535744#Cronobacter_universalis#reduced_virulence	No definition line	62.5
MHUMG1_63431	99	6.00501e-17	I1RQN6#PHI:1974#GzZC289#5518#Fusarium_graminearum#unaffected_pathogenicity	No definition line	62.5
MHUMG1_30621	231	9.43658e-14	I1RDH3#PHI:1952#GzZC267#5518#Fusarium_graminearum#unaffected_pathogenicity	No definition line	62.5
MHUMG1_57441	9	3.82069e-12	Q0P7K6#PHI:6506#clbP#562#Escherichia_coli#reduced_virulence	No definition line	62.5
MHUMG1_85101	18	2.40452e-10	I1RAW4#PHI:7193#FgLaeA#5518#Fusarium_graminearum#reduced_virulence	No definition line	62.5
MHUMG1_93031	32	2.89254e-10	A0A075TRB3#PHI:3301#patN#27334#Penicillium_expansum#unaffected_pathogenicity	No definition line	62.5
MHUMG1_59221	9	6.85649e-09	A0A0P9Y928#PHI:6650#iaaL#29438#Pseudomonas_savastanoi#increased_virulence_(hypervirulence)	No definition line	62.5
MHUMG1_43171	11	1.45911e-89	S0E3H0#PHI:3210#FfSge1#5127#Fusarium_fujikuroi#unaffected_pathogenicity	No definition line	62.4434
MHUMG1_77241	11	0	Q4I2M7#PHI:1676#GzDHHC004#5518#Fusarium_graminearum#unaffected_pathogenicity	No definition line	62.442
MHUMG1_72361	6	1.95519e-143	I1RNJ6#PHI:5784#Fgsg05579#5518#Fusarium_graminearum#unaffected_pathogenicity	No definition line	62.4309
MHUMG1_76001	34	0	I1RHZ6#PHI:1887#GzZC202#5518#Fusarium_graminearum#unaffected_pathogenicity	No definition line	62.3794
MHUMG1_32881	7	0	G4MRB4#PHI:4491#SHM#318829#Magnaporthe_oryzae#reduced_virulence	No definition line	62.3431
MHUMG1_81171	8	3.21038e-121	N4X9G3#PHI:4233#ftr1#5016#Bipolaris_maydis#reduced_virulence	No definition line	62.3418
MHUMG1_28901	39	4.84264e-171	I1RZX9#PHI:1014#GzGPA3#5518#Fusarium_graminearum#unaffected_pathogenicity	No definition line	62.3269
MHUMG1_88401	13	0	I1S368#PHI:6127#PLC#5518#Fusarium_graminearum#unaffected_pathogenicity	No definition line	62.2735
MHUMG1_4491	20	0	G4NB40#PHI:5033#MoSRE1#318829#Magnaporthe_oryzae#unaffected_pathogenicity	No definition line	62.2642
MHUMG1_54931	3	2.82494e-35	I1RCG0#PHI:1539#GzMyb003#5518#Fusarium_graminearum#unaffected_pathogenicity	No definition line	62.2642
MHUMG1_19211	307	0	I1RZR8#PHI:1752#GzZC067#5518#Fusarium_graminearum#unaffected_pathogenicity	No definition line	62.2047
MHUMG1_81061	310	0	I1RMG7#PHI:1954#GzZC269#5518#Fusarium_graminearum#unaffected_pathogenicity	No definition line	62.1622
MHUMG1_3751	46	6.19784e-130	A0A1C3YKC6#PHI:5871#Fgsg11080#5518#Fusarium_graminearum#unaffected_pathogenicity	No definition line	62.117
MHUMG1_46861	19	0	I1RZD4#PHI:1413#GzC2H080#5518#Fusarium_graminearum#unaffected_pathogenicity	No definition line	62.1024
MHUMG1_22101	258	1.8969e-92	I1S018#PHI:1689#GzZC004#5518#Fusarium_graminearum#unaffected_pathogenicity	No definition line	62.069
MHUMG1_15041	28	5.51799e-46	L2G011#PHI:3973#ASP#474922#Colletotrichum_gloeosporioides#reduced_virulence	No definition line	62.069
MHUMG1_20491	16	0	D9J222#PHI:2453#Snt2#5507#Fusarium_oxysporum#reduced_virulence	No definition line	62.029
MHUMG1_38431	36	2.87272e-136	J9MHC1#PHI:1103__PHI:2282#FOXG_02277__MeaB#5507#Fusarium_oxysporum#unaffected_pathogenicity__increased_virulence_(hypervirulence)	No definition line	61.9171
MHUMG1_52211	6	0	J4US35#PHI:8673#cryD_(EJP68422)#176275#Beauveria_bassiana#unaffected_pathogenicity	No definition line	61.9134
MHUMG1_89661	280	1.17544e-163	I1RXK9#PHI:1850#GzZC165#5518#Fusarium_graminearum#unaffected_pathogenicity	No definition line	61.9048
MHUMG1_51161	23	1.10162e-125	Q4WWT7#PHI:4896#aspE#746128#Aspergillus_fumigatus#unaffected_pathogenicity	No definition line	61.9048
MHUMG1_103641	11	1.86715e-111	G4NCG1#PHI:3234#MoLYS20#318829#Magnaporthe_oryzae#reduced_virulence	No definition line	61.9048
MHUMG1_45921	6	1.82312e-106	I1RMP0#PHI:1485#GzHMG017#5518#Fusarium_graminearum#unaffected_pathogenicity	No definition line	61.9048
MHUMG1_46811	18	1.00145e-70	Q8Y8N0#PHI:6510__PHI:7620#CshA__Lmo0866#1639#Listeria_monocytogenes#unaffected_pathogenicity__increased_virulence_(hypervirulence)	No definition line	61.9048
MHUMG1_90171	10	3.73085e-58	P29138#PHI:4615#Pr1#5530#Metarhizium_anisopliae#unaffected_pathogenicity	No definition line	61.9048
MHUMG1_20461	6	8.43033e-43	Q5KN74#PHI:7207#msh2#5207#Cryptococcus_neoformans#unaffected_pathogenicity	No definition line	61.9048
MHUMG1_58791	27	8.3266e-35	Q5EMY3#PHI:860#MSP1#318829#Magnaporthe_oryzae#reduced_virulence	No definition line	61.9048
MHUMG1_93091	132	2.82269e-14	A0A024CHY4#PHI:4837#cipA#36746#Pseudomonas_cichorii#reduced_virulence	No definition line	61.9048
MHUMG1_41701	48	9.61819e-09	Q4X1Y0#PHI:2514#PFS2#746128#Aspergillus_fumigatus#lethal	No definition line	61.9048
MHUMG1_89271	8	5.22599e-08	I1R983#PHI:1992#GzZC307#5518#Fusarium_graminearum#unaffected_pathogenicity	No definition line	61.9048
MHUMG1_73081	13	0	Q8J0H8#PHI:7228#tre1#318829#Magnaporthe_oryzae#unaffected_pathogenicity	No definition line	61.8759
MHUMG1_38751	9	0	J5JDI1#PHI:3095#Ktr1#176275#Beauveria_bassiana#unaffected_pathogenicity	No definition line	61.8056
MHUMG1_3781	6	0	I1RW28#PHI:1646#GzWing018#5518#Fusarium_graminearum#reduced_virulence	No definition line	61.7876
MHUMG1_32531	269	5.97873e-10	I1S4B9#PHI:1738#GzZC053#5518#Fusarium_graminearum#unaffected_pathogenicity	No definition line	61.7647
MHUMG1_63371	19	1.88263e-152	I1RC37#PHI:1302#GzbHLH003#5518#Fusarium_graminearum#unaffected_pathogenicity	No definition line	61.7073
MHUMG1_60671	6	0	Q4W9S1#PHI:6557#cysB#746128#Aspergillus_fumigatus#unaffected_pathogenicity__reduced_virulence	No definition line	61.6896
MHUMG1_39611	14	0	I1RPD3#PHI:6719#FgPLC1#5518#Fusarium_graminearum#reduced_virulence	No definition line	61.674
MHUMG1_59201	5	2.73979e-11	I1RX03#PHI:3985#FGSG_08844_(Sc_gpi7)#5518#Fusarium_graminearum#unaffected_pathogenicity	No definition line	61.6667
MHUMG1_67981	255	0	I1RAA6#PHI:1256#FGSG_00433#5518#Fusarium_graminearum#unaffected_pathogenicity	No definition line	61.6611
MHUMG1_4681	9	3.79229e-103	M7THD3#PHI:6627#BcCPA1#40559#Botrytis_cinerea#reduced_virulence	No definition line	61.6601
MHUMG1_62661	6	0	H1VQ06#PHI:8878#ChBUB2_(XP_018164413)#80884#Colletotrichum_higginsianum#reduced_virulence	No definition line	61.6438
MHUMG1_4171	45	0	G4NCS2#PHI:6780#MoCreC#318829#Magnaporthe_oryzae#reduced_virulence	No definition line	61.5646
MHUMG1_87721	37	0	E2EAF6#PHI:2357#CYP52X1#176275#Beauveria_bassiana#reduced_virulence	No definition line	61.5538
MHUMG1_44761	239	4.34714e-113	I1RUV3#PHI:1861#GzZC176#5518#Fusarium_graminearum#unaffected_pathogenicity	No definition line	61.5385
MHUMG1_68961	34	4.86426e-61	Q8TG40#PHI:4925#Hbr1#5476#Candida_albicans#reduced_virulence	No definition line	61.5385
MHUMG1_4121	23	1.95311e-48	J4WD57#PHI:7593#VVD#176275#Beauveria_bassiana#reduced_virulence	No definition line	61.5385
MHUMG1_56941	9	1.98787e-31	I1RFD7#PHI:1969#GzZC284#5518#Fusarium_graminearum#unaffected_pathogenicity	No definition line	61.5385
MHUMG1_100051	7	1.36681e-18	Q9UUS8#PHI:167#CHIP3#474922#Colletotrichum_gloeosporioides#unaffected_pathogenicity	No definition line	61.5385
MHUMG1_87341	11	9.68931e-11	I1RGD9#PHI:1941#GzZC256#5518#Fusarium_graminearum#unaffected_pathogenicity	No definition line	61.5385
MHUMG1_92841	7	3.64795e-07	P58371#PHI:2117#SPM1#318829#Magnaporthe_oryzae#reduced_virulence	No definition line	61.5385
MHUMG1_13151	9	0	I1RX22#PHI:1595#GzOB035#5518#Fusarium_graminearum#unaffected_pathogenicity	No definition line	61.5094
MHUMG1_24701	5	0	Q4X0J6#PHI:2517#TRPS#746128#Aspergillus_fumigatus#lethal	No definition line	61.4691
MHUMG1_29221	19	0	G4N2X9#PHI:5189#MoLDS1#318829#Magnaporthe_oryzae#reduced_virulence	No definition line	61.3936
MHUMG1_39891	41	7.42096e-111	I1RUF1#PHI:5843#Fgsg07841#5518#Fusarium_graminearum#unaffected_pathogenicity	No definition line	61.3445
MHUMG1_23561	13	0	X0I5S4#PHI:6530#gas1#5507#Fusarium_oxysporum#reduced_virulence	No definition line	61.3248
MHUMG1_27171	3	0	Q4HY90#PHI:1525#GzHOMEL035#5518#Fusarium_graminearum#unaffected_pathogenicity	No definition line	61.2952
MHUMG1_61931	10	0	I1RS37#PHI:1643#GzWing015#5518#Fusarium_graminearum#reduced_virulence	No definition line	61.2946
MHUMG1_103241	262	0	I1RSP9#PHI:1798#GzZC113#5518#Fusarium_graminearum#unaffected_pathogenicity	No definition line	61.2903
MHUMG1_1331	258	0	I1S4P4#PHI:1217#FGSG_00792#5518#Fusarium_graminearum#reduced_virulence	No definition line	61.284
MHUMG1_88061	41	4.07633e-120	Q32WF7#PHI:2269#Mdh1#13684#Parastagonospora_nodorum#unaffected_pathogenicity	No definition line	61.2782
MHUMG1_16881	3	0	G4MPB7#PHI:4495#Bud6p#318829#Magnaporthe_oryzae#unaffected_pathogenicity	No definition line	61.2335
MHUMG1_105221	63	5.88809e-152	I1S3J8#PHI:5800#Fgsg11385#5518#Fusarium_graminearum#unaffected_pathogenicity	No definition line	61.1898
MHUMG1_41451	2	1.28e-59	I1RAZ9#PHI:1472#GzHMG004#5518#Fusarium_graminearum#unaffected_pathogenicity	No definition line	61.1842
MHUMG1_81401	26	9.6521e-100	I1RMI1#PHI:1325#GzbZIP007#5518#Fusarium_graminearum#reduced_virulence	No definition line	61.1321
MHUMG1_83431	287	0	I1RLS0#PHI:1957#GzZC272#5518#Fusarium_graminearum#unaffected_pathogenicity	No definition line	61.1111
MHUMG1_105641	399	0	I1RLM4#PHI:1977#GzZC292#5518#Fusarium_graminearum#unaffected_pathogenicity	No definition line	61.1111
MHUMG1_47501	34	2.94223e-159	A0A0U5BRC2#PHI:7866#Lon#346#Xanthomonas_citri#increased_virulence_(hypervirulence)__reduced_virulence__unaffected_pathogenicity	No definition line	61.1111
MHUMG1_79531	23	1.34697e-101	Q4W9X3#PHI:3275#fhpA#746128#Aspergillus_fumigatus#unaffected_pathogenicity	No definition line	61.1111
MHUMG1_99851	273	3.59478e-79	I1RHH3#PHI:1908#GzZC223#5518#Fusarium_graminearum#unaffected_pathogenicity	No definition line	61.1111
MHUMG1_45121	23	4.3804e-62	I1RI73#PHI:1284#FGSG_03499#5518#Fusarium_graminearum#unaffected_pathogenicity	No definition line	61.1111
MHUMG1_72561	73	4.73977e-48	Q9UW03#PHI:202__PHI:1160__PHI:2309#BcatrB#40559#Botrytis_cinerea#unaffected_pathogenicity__reduced_virulence__chemistry_target:_sensitivity_to_chemical	No definition line	61.1111
MHUMG1_37021	8	2.81746e-47	C5P3X6#PHI:479#MEP1#199306#Coccidioides_posadasii#reduced_virulence	No definition line	61.1111
MHUMG1_62891	57	1.92715e-27	G4MYS1#PHI:4736#MoYpt7#318829#Magnaporthe_oryzae#loss_of_pathogenicity	No definition line	61.1111
MHUMG1_23491	24	1.7437e-24	Q8Y0J2#PHI:5271#fabG1#305#Ralstonia_solanacearum#lethal	No definition line	61.1111
MHUMG1_32541	5	3.48099e-18	P06618#PHI:4171#iaaH-1#29438#Pseudomonas_savastanoi#reduced_virulence	No definition line	61.1111
MHUMG1_80661	48	3.15315e-17	I1REA6#PHI:5822#Fgsg01989#5518#Fusarium_graminearum#unaffected_pathogenicity	No definition line	61.1111
MHUMG1_38861	6	4.37235e-13	E9DS54#PHI:8769#MaPpt1#92637#Metarhizium_acridum#unaffected_pathogenicity	No definition line	61.1111
MHUMG1_44291	79	1.94462e-11	Q9I4X3#PHI:3291__PHI:5563__PHI:5585#pqsA#287#Pseudomonas_aeruginosa#reduced_virulence	No definition line	61.1111
MHUMG1_68161	49	2.30385e-09	A4RJV3#PHI:6135__PHI:6636#PEF1__MoMdv1#318829#Magnaporthe_oryzae#reduced_virulence	No definition line	61.1111
MHUMG1_53621	13	5.61698e-08	P39827#PHI:281#CDC10#5476#Candida_albicans#reduced_virulence	No definition line	61.1111
MHUMG1_36811	10	3.36814e-07	Q887P8#PHI:7031#algD#317#Pseudomonas_syringae#unaffected_pathogenicity	No definition line	61.1111
MHUMG1_64841	108	0	I1RAP1#PHI:1988#GzZC303#5518#Fusarium_graminearum#unaffected_pathogenicity	No definition line	61
MHUMG1_25181	13	0	G4NIS9#PHI:785#MGG_04128#318829#Magnaporthe_oryzae#reduced_virulence	No definition line	60.9562
MHUMG1_14991	10	1.07359e-19	Q8J1W4#PHI:291#CPPH1#5111#Claviceps_purpurea#unaffected_pathogenicity	No definition line	60.9375
MHUMG1_104681	5	0	G4N5E4#PHI:2060#MgLig4#318829#Magnaporthe_oryzae#unaffected_pathogenicity	No definition line	60.9298
MHUMG1_67471	6	0	I1RA50#PHI:1453#GzAra001#5518#Fusarium_graminearum#lethal	No definition line	60.9195
MHUMG1_93161	6	4.69807e-131	Q4U4T0#PHI:2388#Chi2#5530#Metarhizium_anisopliae#increased_virulence_(hypervirulence)__reduced_virulence	No definition line	60.8974
MHUMG1_94841	941	0	Q4WT66#PHI:2511#Pes1#746128#Aspergillus_fumigatus#reduced_virulence	No definition line	60.8696
MHUMG1_46541	179	1.87582e-57	G4MVR0#PHI:5623#FZC29#318829#Magnaporthe_oryzae#unaffected_pathogenicity	No definition line	60.8696
MHUMG1_52081	311	2.65351e-57	I1RH93#PHI:1924#GzZC239#5518#Fusarium_graminearum#unaffected_pathogenicity	No definition line	60.8696
MHUMG1_17911	35	1.71149e-28	G4MZ98#PHI:5186#MoAPX2#318829#Magnaporthe_oryzae#reduced_virulence	No definition line	60.8696
MHUMG1_97791	228	1.30295e-24	I1RIL1#PHI:1835#GzZC150#5518#Fusarium_graminearum#unaffected_pathogenicity	No definition line	60.8696
MHUMG1_100601	6	5.53315e-14	G4NIB5#PHI:812#MGG_10702#318829#Magnaporthe_oryzae#reduced_virulence	No definition line	60.8696
MHUMG1_100511	9	0	Q522W5#PHI:2086#Moatg24#318829#Magnaporthe_oryzae#unaffected_pathogenicity	No definition line	60.8519
MHUMG1_75501	33	0	Q4WC12#PHI:3276#fhpB#746128#Aspergillus_fumigatus#unaffected_pathogenicity	No definition line	60.8295
MHUMG1_7181	19	7.55306e-69	J5JHE8#PHI:7377#Blys4#176275#Beauveria_bassiana#unaffected_pathogenicity	No definition line	60.8187
MHUMG1_28241	259	0	I1S077#PHI:1210#FGSG_10095#5518#Fusarium_graminearum#reduced_virulence	No definition line	60.7477
MHUMG1_20951	134	0	Q3Y5V5#PHI:1018__PHI:2042#ABC3#318829#Magnaporthe_oryzae#loss_of_pathogenicity	No definition line	60.7143
MHUMG1_54471	279	0	I1S7B9#PHI:1739#GzZC054#5518#Fusarium_graminearum#unaffected_pathogenicity	No definition line	60.7143
MHUMG1_5991	23	1.07436e-47	I1RY71#PHI:1313#GzbHLH014#5518#Fusarium_graminearum#unaffected_pathogenicity	No definition line	60.7143
MHUMG1_92071	266	4.51871e-16	I1RDP6#PHI:1950#GzZC265#5518#Fusarium_graminearum#unaffected_pathogenicity	No definition line	60.7143
MHUMG1_21311	5	3.95577e-43	I1RS06#PHI:1665#GzCCHC005#5518#Fusarium_graminearum#unaffected_pathogenicity	No definition line	60.6299
MHUMG1_34861	318	0	I1RDE2#PHI:1960#GzZC275#5518#Fusarium_graminearum#unaffected_pathogenicity	No definition line	60.6061
MHUMG1_45231	256	1.02409e-88	I1RNU2#PHI:1895#GzZC210#5518#Fusarium_graminearum#unaffected_pathogenicity	No definition line	60.6061
MHUMG1_44021	4	0	I1RFP4#PHI:1441#GzDDT#5518#Fusarium_graminearum#reduced_virulence	No definition line	60.5159
MHUMG1_4571	5	0	I1RVV2#PHI:1611#GzP53L004#5518#Fusarium_graminearum#unaffected_pathogenicity	No definition line	60.4508
MHUMG1_3411	10	5.82332e-26	G4NCG1#PHI:3234#MoLYS20#318829#Magnaporthe_oryzae#reduced_virulence	No definition line	60.3774
MHUMG1_88441	307	1.26995e-165	I1RMD1#PHI:1958#GzZC273#5518#Fusarium_graminearum#unaffected_pathogenicity	No definition line	60.3604
MHUMG1_8001	11	4.20099e-80	I1RAW2#PHI:1345#GzC2H005#5518#Fusarium_graminearum#unaffected_pathogenicity	No definition line	60.3015
MHUMG1_24801	2	8.45385e-98	F9XNZ8#PHI:8592#ZtPpt#1047171#Zymoseptoria_tritici#loss_of_pathogenicity	No definition line	60.2888
MHUMG1_10301	11	0	Q4WUL6#PHI:362__PHI:2520#LYSF__LYS4#746128#Aspergillus_fumigatus#loss_of_pathogenicity__lethal	No definition line	60.1969
MHUMG1_4981	11	2.87904e-160	G4NCW8#PHI:2101#MGG_11454.5#318829#Magnaporthe_oryzae#unaffected_pathogenicity	No definition line	60.1732
MHUMG1_1061	11	0	A0A095EN78#PHI:4555#URE1#552467#Cryptococcus_gattii_vgiii#reduced_virulence	No definition line	60.1665
MHUMG1_24901	16	0	I1S1U7#PHI:2352__PHI:2354#AMT2#5518#Fusarium_graminearum#unaffected_pathogenicity__reduced_virulence	No definition line	60.1533
MHUMG1_102071	95	0	Q3Y5V5#PHI:1018__PHI:2042#ABC3#318829#Magnaporthe_oryzae#loss_of_pathogenicity	No definition line	60
MHUMG1_39801	15	9.61033e-168	I1RPG1#PHI:1326#GzbZIP008#5518#Fusarium_graminearum#unaffected_pathogenicity	No definition line	60
MHUMG1_91961	136	3.16169e-164	Q8XQ67#PHI:7323#ralA#305#Ralstonia_solanacearum#loss_of_pathogenicity	No definition line	60
MHUMG1_38121	16	3.50969e-153	G4MWU9#PHI:2019#MoPLC3#318829#Magnaporthe_oryzae#loss_of_pathogenicity	No definition line	60
MHUMG1_7101	5	2.14393e-146	G4MZ21#PHI:8649#Poalkb1_(MGG_01363)#318829#Magnaporthe_oryzae#reduced_virulence	No definition line	60
MHUMG1_45111	13	2.0236e-138	E9R863#PHI:5267#UgeB#162425#Aspergillus_nidulans#increased_virulence_(hypervirulence)	No definition line	60
MHUMG1_61231	4	6.63455e-112	I1RK21#PHI:1559#GzNEG001#5518#Fusarium_graminearum#unaffected_pathogenicity	No definition line	60
MHUMG1_56651	259	3.98029e-111	G4MLZ9#PHI:5633#FZC38#318829#Magnaporthe_oryzae#unaffected_pathogenicity	No definition line	60
MHUMG1_96261	307	1.84587e-61	I1RFF7#PHI:1837#GzZC152#5518#Fusarium_graminearum#unaffected_pathogenicity	No definition line	60
MHUMG1_79511	7	7.68103e-56	Q5KAG0#PHI:4197#LHC1#5207#Cryptococcus_neoformans#reduced_virulence	No definition line	60
MHUMG1_90091	25	2.32965e-55	Q0U2A0#PHI:2255#Abd1#13684#Parastagonospora_nodorum#unaffected_pathogenicity	No definition line	60
MHUMG1_68471	14	4.59699e-54	I1R9K2#PHI:8645#FgLDHL1_(FGSG_00145)#5518#Fusarium_graminearum#reduced_virulence	No definition line	60
MHUMG1_85861	18	1.32696e-49	Q01446#PHI:112#MAK1#140110#Nectria_haematococca#reduced_virulence	No definition line	60
MHUMG1_19761	45	1.04793e-48	G2XIG8#PHI:7173#HiC-15#27337#Verticillium_dahliae#reduced_virulence	No definition line	60
MHUMG1_90051	9	3.89437e-45	O93806#PHI:174#GNA1#5476#Candida_albicans#reduced_virulence	No definition line	60
MHUMG1_16391	39	3.21057e-35	G4N134#PHI:5606#FZC15#318829#Magnaporthe_oryzae#unaffected_pathogenicity	No definition line	60
MHUMG1_88471	300	2.33018e-34	I1RJB8#PHI:1879#GzZC194#5518#Fusarium_graminearum#unaffected_pathogenicity	No definition line	60
MHUMG1_98971	10	2.1803e-30	I1REJ1#PHI:1662#GzCCHC002#5518#Fusarium_graminearum#unaffected_pathogenicity	No definition line	60
MHUMG1_82631	5	1.57357e-29	Q5K8R6#PHI:2822#Cxt1p#5207#Cryptococcus_neoformans#reduced_virulence	No definition line	60
MHUMG1_76691	37	5.48707e-29	Q6WP49#PHI:438#BcBOT1_(CND5)#40559#Botrytis_cinerea#reduced_virulence	No definition line	60
MHUMG1_63221	21	1.68012e-28	G4MS58#PHI:881#MGG_04556#318829#Magnaporthe_oryzae#reduced_virulence	No definition line	60
MHUMG1_54261	8	3.68308e-26	Q8IEJ6#PHI:3101#BCKDH#5833#Plasmodium_falciparum#reduced_virulence	No definition line	60
MHUMG1_86341	42	1.42881e-16	J4KL74#PHI:7381#Blys8#176275#Beauveria_bassiana#unaffected_pathogenicity	No definition line	60
MHUMG1_39671	17	2.51878e-14	Q0PND8#PHI:593#PEX6#318829#Magnaporthe_oryzae#loss_of_pathogenicity	No definition line	60
MHUMG1_93831	82	8.61703e-13	I1RY91#PHI:1765#GzZC080#5518#Fusarium_graminearum#unaffected_pathogenicity	No definition line	60
MHUMG1_52361	21	2.23769e-12	D4III8#PHI:2227#pao#5270#Ustilago_maydis#reduced_virulence__loss_of_pathogenicity	No definition line	60
MHUMG1_15561	19	5.34555e-12	I1RIL9#PHI:8803#FgShyC_(FGSG_03657)#5518#Fusarium_graminearum#unaffected_pathogenicity	No definition line	60
MHUMG1_89241	21	3.5862e-11	W9BF24#PHI:7485#EntA_(VK055_1922)#573#Klebsiella_pneumoniae#unaffected_pathogenicity__reduced_virulence	No definition line	60
MHUMG1_87541	263	5.76045e-11	I1RG27#PHI:1442#GzDNL#5518#Fusarium_graminearum#unaffected_pathogenicity	No definition line	60
MHUMG1_32481	16	7.8465e-10	Q4V006#PHI:3947#XC_0281#339#Xanthomonas_campestris#reduced_virulence	No definition line	60
MHUMG1_83801	20	2.84781e-08	B0BES0#PHI:3934#cpnox2#5111#Claviceps_purpurea#increased_virulence_(hypervirulence)	No definition line	60
MHUMG1_3691	8	4.91813e-08	I1S9T2#PHI:1623#GzJUM005#5518#Fusarium_graminearum#unaffected_pathogenicity	No definition line	60
MHUMG1_104761	9	1.02005e-07	P06618#PHI:4171#iaaH-1#29438#Pseudomonas_savastanoi#reduced_virulence	No definition line	60
MHUMG1_19681	9	5.2503e-07	P0A1P6#PHI:7742#glnA#28901#Salmonella_enterica#reduced_virulence	No definition line	60
MHUMG1_34071	18	4.99273e-155	I1RZL0#PHI:1414#GzC2H081#5518#Fusarium_graminearum#unaffected_pathogenicity	No definition line	59.9576
MHUMG1_72321	7	3.00296e-71	I1RTF5#PHI:1532#GzLam001#5518#Fusarium_graminearum#unaffected_pathogenicity	No definition line	59.8726
MHUMG1_44801	9	3.33583e-159	Q4WCZ1#PHI:2969#argEF#746128#Aspergillus_fumigatus#reduced_virulence	No definition line	59.8575
MHUMG1_52291	40	6.36767e-90	A0JC80#PHI:3623#RacA#35717#Epichloe_festucae#increased_virulence_(hypervirulence)	No definition line	59.8326
MHUMG1_44161	6	3.92588e-50	I1R9C6#PHI:8666#FgKP4L-1_(FGSG_00060)#5518#Fusarium_graminearum#reduced_virulence	No definition line	59.8291
MHUMG1_31601	4	5.19056e-177	A5HF03#PHI:1057#MTP1#318829#Magnaporthe_oryzae#unaffected_pathogenicity	No definition line	59.8194
MHUMG1_57581	79	0	O60034#PHI:1030#bcatrA#40559#Botrytis_cinerea#unaffected_pathogenicity	No definition line	59.7993
MHUMG1_66641	16	2.28779e-84	I1RSH6#PHI:1510#GzHOME005#5518#Fusarium_graminearum#unaffected_pathogenicity	No definition line	59.7561
MHUMG1_45991	22	0	I1RQ92#PHI:1487#GzHMG019#5518#Fusarium_graminearum#unaffected_pathogenicity	No definition line	59.7222
MHUMG1_80571	15	7.87847e-107	I1RA01#PHI:1537#MYT1#5518#Fusarium_graminearum#unaffected_pathogenicity	No definition line	59.6721
MHUMG1_44621	4	1.53277e-147	A0A177DU44#PHI:8000#csn5#5599#Alternaria_alternata#reduced_virulence	No definition line	59.6439
MHUMG1_75831	5	0	C6ZRH8#PHI:2976#CgOPT1#474922#Colletotrichum_gloeosporioides#reduced_virulence	No definition line	59.6394
MHUMG1_101271	196	2.92341e-74	I1RHA1#PHI:1270#FGSG_03146#5518#Fusarium_graminearum#unaffected_pathogenicity	No definition line	59.4872
MHUMG1_73001	68	2.24573e-152	I1RM58#PHI:5851#Fgsg05039#5518#Fusarium_graminearum#unaffected_pathogenicity	No definition line	59.4787
MHUMG1_62171	9	0	O13289#PHI:106__PHI:7209#CAT1__cat1#5476#Candida_albicans#reduced_virulence__unaffected_pathogenicity	No definition line	59.4595
MHUMG1_20041	20	0	G4MQP9#PHI:2177#PAS1#318829#Magnaporthe_oryzae#unaffected_pathogenicity	No definition line	59.3973
MHUMG1_81791	25	4.81975e-145	Q0UA24#PHI:2256#Xdh1#13684#Parastagonospora_nodorum#unaffected_pathogenicity	No definition line	59.3923
MHUMG1_3651	274	0	I1RVU7#PHI:1789#GzZC104#5518#Fusarium_graminearum#unaffected_pathogenicity	No definition line	59.3915
MHUMG1_32381	8	2.02178e-179	G4NCG1#PHI:3234#MoLYS20#318829#Magnaporthe_oryzae#reduced_virulence	No definition line	59.3886
MHUMG1_64641	49	0	Q9C2Y4#PHI:405#PDE1#318829#Magnaporthe_oryzae#reduced_virulence	No definition line	59.375
MHUMG1_82621	24	2.67931e-115	P29138#PHI:4615#Pr1#5530#Metarhizium_anisopliae#unaffected_pathogenicity	No definition line	59.375
MHUMG1_25581	9	1.52533e-128	Q0UHM8#PHI:2257#Pbl1#13684#Parastagonospora_nodorum#unaffected_pathogenicity	No definition line	59.3373
MHUMG1_26871	12	2.6558e-57	P87199#PHI:465#KIN2#5270#Ustilago_maydis#reduced_virulence	No definition line	59.322
MHUMG1_18071	32	8.0849e-121	A5H456#PHI:867__PHI:1159#MgAtr7#1047171#Zymoseptoria_tritici#unaffected_pathogenicity__chemistry_target:_sensitivity_to_chemical	No definition line	59.2705
MHUMG1_27071	237	0	I1S042#PHI:1090__PHI:1163__PHI:3893#FGSG_10057__ERB1__FgEBR1#5518#Fusarium_graminearum#reduced_virulence	No definition line	59.2628
MHUMG1_94561	95	0	Q2VLJ3#PHI:713#PKS13_(ZEA2)#5518#Fusarium_graminearum#unaffected_pathogenicity	No definition line	59.2593
MHUMG1_28131	36	2.36689e-123	W7N2C1#PHI:3384#FVEG_12530#117187#Fusarium_verticillioides#unaffected_pathogenicity	No definition line	59.2593
MHUMG1_84691	67	5.20177e-93	G5EI34#PHI:3019#MoLys2#318829#Magnaporthe_oryzae#reduced_virulence	No definition line	59.2593
MHUMG1_83661	269	1.71573e-38	Q4I0C5#PHI:1764#GzZC079#5518#Fusarium_graminearum#unaffected_pathogenicity	No definition line	59.2593
MHUMG1_100391	44	5.69906e-22	I1RUC7#PHI:1260#FGSG_07816#5518#Fusarium_graminearum#unaffected_pathogenicity	No definition line	59.2593
MHUMG1_94331	19	2.50752e-07	B1GVX4#PHI:2289#BcBOA2#40559#Botrytis_cinerea#reduced_virulence	No definition line	59.2593
MHUMG1_71271	19	0	G4MZD0#PHI:3060__PHI:4054#Molrg1__Lrg1#318829#Magnaporthe_oryzae#loss_of_pathogenicity	No definition line	59.243
MHUMG1_26641	6	2.7474e-45	I1S0G0#PHI:1617#GzssDB002#5518#Fusarium_graminearum#unaffected_pathogenicity	No definition line	59.1837
MHUMG1_85611	28	5.37387e-75	Q4WPX2#PHI:494#PPOA#746128#Aspergillus_fumigatus#increased_virulence_(hypervirulence)	No definition line	59.1716
MHUMG1_25271	4	7.80239e-123	M7TSY2#PHI:7975#Nop53#40559#Botrytis_cinerea#reduced_virulence	No definition line	59.1647
MHUMG1_7821	3	0	I1RN15#PHI:1456#GzAra004#5518#Fusarium_graminearum#unaffected_pathogenicity	No definition line	59.129
MHUMG1_60161	10	0	I1RSV8#PHI:1519#GzHOMEL018#5518#Fusarium_graminearum#unaffected_pathogenicity	No definition line	59.115
MHUMG1_75991	8	0	T2C913#PHI:3225#Ndo1#36651#Penicillium_digitatum#unaffected_pathogenicity	No definition line	59.1133
MHUMG1_14771	109	1.12037e-151	I1RXE8#PHI:1763#GzZC078#5518#Fusarium_graminearum#unaffected_pathogenicity	No definition line	59.0909
MHUMG1_73521	30	3.63192e-130	W7N2C1#PHI:3384#FVEG_12530#117187#Fusarium_verticillioides#unaffected_pathogenicity	No definition line	59.0909
MHUMG1_78821	163	6.23688e-101	I1RZD4#PHI:1413#GzC2H080#5518#Fusarium_graminearum#unaffected_pathogenicity	No definition line	59.0909
MHUMG1_18751	17	1.55082e-63	W7N2B4#PHI:3381#FVEG_12533#117187#Fusarium_verticillioides#unaffected_pathogenicity	No definition line	59.0909
MHUMG1_78051	11	1.36156e-35	Q6WER3#PHI:432__PHI:4212__PHI:4242#FGL1__Fgl1#5518#Fusarium_graminearum#reduced_virulence	No definition line	59.0909
MHUMG1_98011	22	5.5052e-19	B1GVX4#PHI:2289#BcBOA2#40559#Botrytis_cinerea#reduced_virulence	No definition line	59.0909
MHUMG1_44201	254	4.34276e-15	G4NKX6#PHI:5649#FZC52#318829#Magnaporthe_oryzae#unaffected_pathogenicity	No definition line	59.0909
MHUMG1_97511	206	2.19623e-07	P25535#PHI:7028#ubiI#562#Escherichia_coli#reduced_virulence	No definition line	59.0909
MHUMG1_74471	172	4.96889e-07	Q4WPQ8#PHI:2809__PHI:2828#PrtT#746128#Aspergillus_fumigatus#unaffected_pathogenicity	No definition line	59.0909
MHUMG1_65121	18	0	I1RAL4#PHI:1300#GzbHLH001#5518#Fusarium_graminearum#unaffected_pathogenicity	No definition line	59.0517
MHUMG1_1851	5	2.84744e-112	E3Q2L6#PHI:6825#GPI12#31870#Colletotrichum_graminicola#loss_of_pathogenicity	No definition line	59.0278
MHUMG1_43121	13	0	G4MV40#PHI:6395#MoALR2#318829#Magnaporthe_oryzae#reduced_virulence	No definition line	59.019
MHUMG1_95061	101	0	Q9Y8A2#PHI:255#FUM1_(FUM5)#5127#Fusarium_fujikuroi#unaffected_pathogenicity	No definition line	59.0062
MHUMG1_24591	12	0	Q4WNQ3#PHI:8876#gefB_(Afu4g06570)#746128#Aspergillus_fumigatus#unaffected_pathogenicity__loss_of_pathogenicity	No definition line	58.9981
MHUMG1_85191	3	3.48006e-08	I1RKU6#PHI:1455#GzAra003#5518#Fusarium_graminearum#unaffected_pathogenicity	No definition line	58.9744
MHUMG1_38561	20	8.91671e-123	Q6QIY0#PHI:2382#Upa2#5270#Ustilago_maydis#unaffected_pathogenicity	No definition line	58.9091
MHUMG1_3901	19	0	G4MRZ0#PHI:773__PHI:791__PHI:2141#MGG_11899__CDC15#318829#Magnaporthe_oryzae#reduced_virulence__loss_of_pathogenicity	No definition line	58.8867
MHUMG1_87391	10	0	J9VUY6#PHI:6871#gua1#5207#Cryptococcus_neoformans#loss_of_pathogenicity	No definition line	58.8235
MHUMG1_20091	11	1.11544e-163	G4MQQ3#PHI:3065#MoRga5#318829#Magnaporthe_oryzae#unaffected_pathogenicity	No definition line	58.8235
MHUMG1_88191	41	2.43702e-130	G2XIG8#PHI:7173#HiC-15#27337#Verticillium_dahliae#reduced_virulence	No definition line	58.8235
MHUMG1_91121	13	8.27961e-125	Q6IZ78#PHI:3908#ZrfA#746128#Aspergillus_fumigatus#reduced_virulence__loss_of_pathogenicity	No definition line	58.8235
MHUMG1_59281	15	1.36399e-118	Q882F5#PHI:7788#AldB_(PSPTO_2673)#317#Pseudomonas_syringae#reduced_virulence	No definition line	58.8235
MHUMG1_49231	19	2.29767e-49	J9VY90#PHI:9058#lac1#5207#Cryptococcus_neoformans#reduced_virulence	No definition line	58.8235
MHUMG1_11981	191	8.02441e-42	G4MVR0#PHI:5623#FZC29#318829#Magnaporthe_oryzae#unaffected_pathogenicity	No definition line	58.8235
MHUMG1_98381	25	2.89475e-30	A4ZGP3#PHI:1161#MgMfs1#1047171#Zymoseptoria_tritici#chemistry_target:_sensitivity_to_chemical__unaffected_pathogenicity	No definition line	58.8235
MHUMG1_69251	4	2.07859e-21	I1S3J7#PHI:1424#GzC2H092#5518#Fusarium_graminearum#unaffected_pathogenicity	No definition line	58.8235
MHUMG1_47391	15	9.33609e-14	Q5A4W8#PHI:7195#Bdf1#5476#Candida_albicans#reduced_virulence	No definition line	58.8235
MHUMG1_87201	13	2.73588e-12	I1RUH0#PHI:1330#GzbZIP012#5518#Fusarium_graminearum#unaffected_pathogenicity	No definition line	58.8235
MHUMG1_31681	7	1.14633e-10	Q5AH74#PHI:2563#DPP3#5476#Candida_albicans#reduced_virulence	No definition line	58.8235
MHUMG1_52001	29	4.54562e-10	Q0UDE7#PHI:2247#Sch1#13684#Parastagonospora_nodorum#unaffected_pathogenicity	No definition line	58.8235
MHUMG1_60821	13	3.87123e-07	Q5NEU6#PHI:4733#dnaJ#263#Francisella_tularensis#unaffected_pathogenicity	No definition line	58.8235
MHUMG1_52281	6	5.27453e-06	Q4WNM3#PHI:2552#NOP4#746128#Aspergillus_fumigatus#lethal	No definition line	58.8235
MHUMG1_46781	10	0	I1S9V9#PHI:1655#GzWing028#5518#Fusarium_graminearum#unaffected_pathogenicity	No definition line	58.8142
MHUMG1_76341	5	6.58434e-47	Q4WES1#PHI:2550#NOB1#746128#Aspergillus_fumigatus#lethal	No definition line	58.7302
MHUMG1_60511	5	0	G4N704#PHI:7992#PoMuk1_(MGG_06476)__PoMuk1#318829#Magnaporthe_oryzae#unaffected_pathogenicity__loss_of_pathogenicity	No definition line	58.6835
MHUMG1_37311	56	1.95935e-132	I1RHP9#PHI:5795#Fgsg03310#5518#Fusarium_graminearum#unaffected_pathogenicity	No definition line	58.6735
MHUMG1_68701	22	1.10409e-156	G4MXR2#PHI:8753__PHI:8806#MoChia1_(MGG_08054)__MoChi1_(MGG_08054)#318829#Magnaporthe_oryzae#reduced_virulence	No definition line	58.6301
MHUMG1_73181	8	6.6764e-74	J9N257#PHI:2284__PHI:3438#Msb2#5507#Fusarium_oxysporum#reduced_virulence__loss_of_pathogenicity__unaffected_pathogenicity	No definition line	58.6207
MHUMG1_97921	297	9.7894e-53	I1S1N1#PHI:1788#GzZC103#5518#Fusarium_graminearum#unaffected_pathogenicity	No definition line	58.6207
MHUMG1_81841	263	2.74744e-14	I1RER7#PHI:1930#GzZC245#5518#Fusarium_graminearum#unaffected_pathogenicity	No definition line	58.6207
MHUMG1_39101	24	1.26446e-177	Q59RG0#PHI:511#CaNAG4#5476#Candida_albicans#reduced_virulence	No definition line	58.6134
MHUMG1_35101	16	1.5712e-08	I1S828#PHI:1503#GzHMG035#5518#Fusarium_graminearum#unaffected_pathogenicity	No definition line	58.5366
MHUMG1_50161	311	0	I1RBA2#PHI:1842#GzZC157#5518#Fusarium_graminearum#unaffected_pathogenicity	No definition line	58.5209
MHUMG1_6281	5	3.34938e-93	J4KNV2#PHI:6644#CIA30#176275#Beauveria_bassiana#increased_virulence_(hypervirulence)	No definition line	58.5153
MHUMG1_62671	5	0	Q4WJR9#PHI:6554#sB#746128#Aspergillus_fumigatus#unaffected_pathogenicity	No definition line	58.4524
MHUMG1_73191	10	3.279e-69	Q6WIH3#PHI:4972#MEP3#523103#Trichophyton_mentagrophytes#unaffected_pathogenicity	No definition line	58.4211
MHUMG1_16561	267	0	E3QPY3#PHI:4217#NPS6#31870#Colletotrichum_graminicola#reduced_virulence	No definition line	58.3954
MHUMG1_16781	30	0	G4NCI6#PHI:6612#Mocapn9#318829#Magnaporthe_oryzae#unaffected_pathogenicity__reduced_virulence	No definition line	58.3333
MHUMG1_58581	262	0	Q4I0C5#PHI:1764#GzZC079#5518#Fusarium_graminearum#unaffected_pathogenicity	No definition line	58.3333
MHUMG1_74131	353	0	Q6ZX14#PHI:325#ACE1#318829#Magnaporthe_oryzae#effector_(plant_avirulence_determinant)	No definition line	58.3333
MHUMG1_88121	54	0	Q92215#PHI:97#TOXC#5017#Bipolaris_zeicola#reduced_virulence	No definition line	58.3333
MHUMG1_91281	68	0	I1RHJ0#PHI:1907#GzZC222#5518#Fusarium_graminearum#unaffected_pathogenicity	No definition line	58.3333
MHUMG1_76191	255	1.10108e-159	I1RNU2#PHI:1895#GzZC210#5518#Fusarium_graminearum#unaffected_pathogenicity	No definition line	58.3333
MHUMG1_80791	40	8.50713e-72	O42825#PHI:270#RHO1#5476#Candida_albicans#loss_of_pathogenicity	No definition line	58.3333
MHUMG1_13731	257	5.45875e-70	G4N111#PHI:5640#FZC43#318829#Magnaporthe_oryzae#unaffected_pathogenicity	No definition line	58.3333
MHUMG1_73071	10	1.54842e-58	A0A0A2ILW0#PHI:7664#LysM1#27334#Penicillium_expansum#effector_(plant_avirulence_determinant)	No definition line	58.3333
MHUMG1_95721	156	2.16744e-33	I1RSR1#PHI:1797#GzZC112#5518#Fusarium_graminearum#unaffected_pathogenicity	No definition line	58.3333
MHUMG1_36461	64	1.39397e-28	Q6DQW3#PHI:433#CTB1#29003#Cercospora_nicotianae#reduced_virulence	No definition line	58.3333
MHUMG1_24921	147	3.70683e-15	Q9HWG3#PHI:6938__PHI:6989#pchD#287#Pseudomonas_aeruginosa#reduced_virulence__increased_virulence_(hypervirulence)__loss_of_pathogenicity	No definition line	58.3333
MHUMG1_71	52	3.30069e-06	C4YFX2#PHI:211__PHI:6806#CaTUP1__tup1#5476#Candida_albicans#reduced_virulence	No definition line	58.3333
MHUMG1_73481	268	6.81798e-175	I1REQ5#PHI:1711#GzZC026#5518#Fusarium_graminearum#unaffected_pathogenicity	No definition line	58.3144
MHUMG1_18441	3	0	Q4WJR9#PHI:6554#sB#746128#Aspergillus_fumigatus#unaffected_pathogenicity	No definition line	58.3021
MHUMG1_13081	253	0	I1RP25#PHI:1225#FGSG_05775#5518#Fusarium_graminearum#lethal	No definition line	58.2953
MHUMG1_22921	251	8.44844e-131	I1RLX6#PHI:1192#(Sc_Cak1)#5518#Fusarium_graminearum#reduced_virulence	No definition line	58.2609
MHUMG1_51471	51	9.82268e-119	I1RUL5#PHI:1395#GzC2H058#5518#Fusarium_graminearum#unaffected_pathogenicity	No definition line	58.1818
MHUMG1_64831	283	0	I1RAP2#PHI:1987#GzZC302#5518#Fusarium_graminearum#reduced_virulence	No definition line	58.137
MHUMG1_34361	3	0	E3QHX9#PHI:6227#KRE5#31870#Colletotrichum_graminicola#reduced_virulence	No definition line	58.1112
MHUMG1_104881	22	0	Q9P8L8#PHI:544#BCMFS1#40559#Botrytis_cinerea#unaffected_pathogenicity	No definition line	58.0817
MHUMG1_12691	11	0	I1RF25#PHI:1657#GzCCCH001#5518#Fusarium_graminearum#unaffected_pathogenicity	No definition line	58.0645
MHUMG1_84701	39	4.70937e-18	W9BF24#PHI:7485#EntA_(VK055_1922)#573#Klebsiella_pneumoniae#unaffected_pathogenicity__reduced_virulence	No definition line	58.0645
MHUMG1_39771	6	0	Q4WEM7#PHI:2521#GUS1#746128#Aspergillus_fumigatus#lethal	No definition line	58.0595
MHUMG1_55751	7	5.7371e-129	B0XVF7#PHI:2292#aoxA#746128#Aspergillus_fumigatus#unaffected_pathogenicity	No definition line	58.0442
MHUMG1_33301	6	0	Q4WXC5#PHI:2531#PRI1#746128#Aspergillus_fumigatus#lethal	No definition line	58.0153
MHUMG1_46771	11	0	G4NIP8#PHI:2104#MGG_04159.5#318829#Magnaporthe_oryzae#unaffected_pathogenicity	No definition line	57.9968
MHUMG1_63361	8	5.52459e-122	G4MSF9#PHI:8754#MoPer1_(MGG_04527)#318829#Magnaporthe_oryzae#reduced_virulence	No definition line	57.9926
MHUMG1_11271	29	5.58784e-161	Q0UA24#PHI:2256#Xdh1#13684#Parastagonospora_nodorum#unaffected_pathogenicity	No definition line	57.967
MHUMG1_70431	8	0	I1RSN1#PHI:1610#GzP53L003#5518#Fusarium_graminearum#unaffected_pathogenicity	No definition line	57.9353
MHUMG1_7241	12	0	Q6WIH3#PHI:4972#MEP3#523103#Trichophyton_mentagrophytes#unaffected_pathogenicity	No definition line	57.8947
MHUMG1_72131	297	0	I1RND0#PHI:1900#GzZC215#5518#Fusarium_graminearum#unaffected_pathogenicity	No definition line	57.8947
MHUMG1_76791	11	2.40346e-106	O93852#PHI:197#ALO1#5476#Candida_albicans#reduced_virulence	No definition line	57.8947
MHUMG1_16371	28	3.0968e-56	A6QHK8#PHI:3004#ClpX#1280#Staphylococcus_aureus#reduced_virulence	No definition line	57.8947
MHUMG1_341	13	1.0834e-47	C5P3X6#PHI:479#MEP1#199306#Coccidioides_posadasii#reduced_virulence	No definition line	57.8947
MHUMG1_78261	29	1.13574e-43	I1REJ1#PHI:1662#GzCCHC002#5518#Fusarium_graminearum#unaffected_pathogenicity	No definition line	57.8947
MHUMG1_69581	174	2.79278e-35	G4MUR7#PHI:4475#MoTup1#318829#Magnaporthe_oryzae#loss_of_pathogenicity	No definition line	57.8947
MHUMG1_77401	74	1.76232e-30	I1RUC7#PHI:1260#FGSG_07816#5518#Fusarium_graminearum#unaffected_pathogenicity	No definition line	57.8947
MHUMG1_14761	60	1.13088e-25	G4N134#PHI:5606#FZC15#318829#Magnaporthe_oryzae#unaffected_pathogenicity	No definition line	57.8947
MHUMG1_40911	533	8.55549e-18	I1RBT2#PHI:1347#GzC2H007#5518#Fusarium_graminearum#reduced_virulence	No definition line	57.8947
MHUMG1_91611	13	3.93047e-17	G4NCI6#PHI:6612#Mocapn9#318829#Magnaporthe_oryzae#unaffected_pathogenicity__reduced_virulence	No definition line	57.8947
MHUMG1_67611	11	2.13867e-16	B5TQV9#PHI:3325#PGM#1348#Streptococcus_parauberis#reduced_virulence	No definition line	57.8947
MHUMG1_106211	9	9.43113e-11	Q945T9#PHI:653#GIP2#67593#Phytophthora_sojae#effector_(plant_avirulence_determinant)	No definition line	57.8947
MHUMG1_38081	26	8.54323e-10	Q8Y0J2#PHI:5271#fabG1#305#Ralstonia_solanacearum#lethal	No definition line	57.8947
MHUMG1_103561	12	1.44693e-07	A0A290WHN4#PHI:7704#VEDA_05194#27337#Verticillium_dahliae#reduced_virulence__unaffected_pathogenicity	No definition line	57.8947
MHUMG1_55831	195	0	I1RCM9#PHI:1354#GzC2H014#5518#Fusarium_graminearum#reduced_virulence	No definition line	57.8606
MHUMG1_36801	21	3.88602e-128	L2FHG9#PHI:3972#CDA#474922#Colletotrichum_gloeosporioides#unaffected_pathogenicity	No definition line	57.8595
MHUMG1_62281	18	4.51481e-156	I1RC73#PHI:1933__PHI:6134#GzZC248__FHS1#5518#Fusarium_graminearum#reduced_virulence	No definition line	57.8089
MHUMG1_94241	234	0	I1RUB2#PHI:719#GzFUS1#5518#Fusarium_graminearum#unaffected_pathogenicity	No definition line	57.8042
MHUMG1_101621	145	3.25476e-99	Q6ZX14#PHI:325#ACE1#318829#Magnaporthe_oryzae#effector_(plant_avirulence_determinant)	No definition line	57.7778
MHUMG1_89721	303	1.06572e-60	I1RIY6#PHI:1841#GzZC156#5518#Fusarium_graminearum#unaffected_pathogenicity	No definition line	57.7778
MHUMG1_30731	12	7.43046e-97	G4MQZ2#PHI:2038#Mir1#318829#Magnaporthe_oryzae#unaffected_pathogenicity	No definition line	57.732
MHUMG1_76091	257	4.5261e-97	I1S1Q9#PHI:1786#GzZC101#5518#Fusarium_graminearum#unaffected_pathogenicity	No definition line	57.6923
MHUMG1_62931	8	5.72396e-96	I1RBZ7#PHI:1316#GzBrom001#5518#Fusarium_graminearum#unaffected_pathogenicity	No definition line	57.6923
MHUMG1_60701	4	5.18099e-54	P53705#PHI:124#INT1#5476#Candida_albicans#reduced_virulence	No definition line	57.6923
MHUMG1_36251	13	1.41691e-52	P87199#PHI:465#KIN2#5270#Ustilago_maydis#reduced_virulence	No definition line	57.6923
MHUMG1_74931	258	9.69442e-25	I1RH03#PHI:1898#GzZC213#5518#Fusarium_graminearum#unaffected_pathogenicity	No definition line	57.6923
MHUMG1_82411	294	7.81049e-19	G4N897#PHI:5599#FZC10#318829#Magnaporthe_oryzae#unaffected_pathogenicity	No definition line	57.6923
MHUMG1_92541	56	2.03701e-11	I1RUC7#PHI:1260#FGSG_07816#5518#Fusarium_graminearum#unaffected_pathogenicity	No definition line	57.6923
MHUMG1_40461	32	2.9379e-11	I1RKU6#PHI:1455#GzAra003#5518#Fusarium_graminearum#unaffected_pathogenicity	No definition line	57.6923
MHUMG1_381	11	5.77927e-22	I1RQC1#PHI:1310#GzbHLH011#5518#Fusarium_graminearum#unaffected_pathogenicity	No definition line	57.6471
MHUMG1_38591	3	1.39681e-165	I1RMT5#PHI:1294#GzAPSES002#5518#Fusarium_graminearum#unaffected_pathogenicity	No definition line	57.6159
MHUMG1_1561	252	4.72631e-120	I1RFC7#PHI:1239#FGSG_02399#5518#Fusarium_graminearum#unaffected_pathogenicity	No definition line	57.6023
MHUMG1_101331	227	1.55924e-95	I1RFK9#PHI:1269#FGSG_02488#5518#Fusarium_graminearum#unaffected_pathogenicity	No definition line	57.5758
MHUMG1_14361	17	6.47155e-84	Q0UA24#PHI:2256#Xdh1#13684#Parastagonospora_nodorum#unaffected_pathogenicity	No definition line	57.5758
MHUMG1_11281	352	5.56683e-16	I1RRM0#PHI:1891#GzZC206#5518#Fusarium_graminearum#unaffected_pathogenicity	No definition line	57.5758
MHUMG1_101441	25	6.58803e-14	B1GVX7#PHI:2290#BcBOA6#40559#Botrytis_cinerea#reduced_virulence	No definition line	57.5758
MHUMG1_1761	5	5.11955e-105	I1RJS3#PHI:1162#BDM1#5518#Fusarium_graminearum#reduced_virulence__unaffected_pathogenicity	No definition line	57.5658
MHUMG1_91601	4	2.85853e-60	G4N1N6#PHI:5191#TPX1#318829#Magnaporthe_oryzae#reduced_virulence	No definition line	57.5581
MHUMG1_22081	319	6.6358e-23	I1RFK9#PHI:1269#FGSG_02488#5518#Fusarium_graminearum#unaffected_pathogenicity	No definition line	57.5
MHUMG1_43851	4	0	I1RFM9#PHI:3983#FGSG_02509.3_(Sc_gpi7)#5518#Fusarium_graminearum#reduced_virulence	No definition line	57.4493
MHUMG1_6981	252	0	I1RQS1#PHI:1262#FGSG_06420#5518#Fusarium_graminearum#unaffected_pathogenicity	No definition line	57.444
MHUMG1_44101	5	1.76351e-76	I1RFQ3#PHI:1543#GzMyb007#5518#Fusarium_graminearum#unaffected_pathogenicity	No definition line	57.4394
MHUMG1_16571	105	0	Q4WR83#PHI:2321#SidI#746128#Aspergillus_fumigatus#reduced_virulence	No definition line	57.4138
MHUMG1_50901	6	1.00587e-57	B0YDG4#PHI:3237#ctrA2#746128#Aspergillus_fumigatus#unaffected_pathogenicity	No definition line	57.3171
MHUMG1_91031	14	2.03501e-49	Q0R411#PHI:6417#Sm1#29875#Trichoderma_virens#reduced_virulence	No definition line	57.265
MHUMG1_92151	8	1.1269e-144	Q4WDL0#PHI:2525#TOM40#746128#Aspergillus_fumigatus#lethal	No definition line	57.1831
MHUMG1_11151	47	0	G4MNA5#PHI:2096#Calcium-transporting_ATPase_3#318829#Magnaporthe_oryzae#loss_of_pathogenicity	No definition line	57.1429
MHUMG1_81601	155	0	G4MKP6#PHI:3161#Mohik5#318829#Magnaporthe_oryzae#loss_of_pathogenicity	No definition line	57.1429
MHUMG1_88071	211	0	Q6ZX14#PHI:325#ACE1#318829#Magnaporthe_oryzae#effector_(plant_avirulence_determinant)	No definition line	57.1429
MHUMG1_101721	106	0	B1GVX7#PHI:2290#BcBOA6#40559#Botrytis_cinerea#reduced_virulence	No definition line	57.1429
MHUMG1_4371	22	3.1501e-165	A0A0F6AZ29#PHI:7216#STM14_1007#28901#Salmonella_enterica#reduced_virulence	No definition line	57.1429
MHUMG1_99401	93	2.38845e-163	I1S2J9#PHI:3924__PHI:8224__PHI:9036#FgABC1__Fg10995__fgm5_(FGSG_10995)#5518#Fusarium_graminearum#reduced_virulence	No definition line	57.1429
MHUMG1_74381	5	8.77508e-105	I1RXB9#PHI:1625#GzOpi#5518#Fusarium_graminearum#unaffected_pathogenicity	No definition line	57.1429
MHUMG1_35251	281	3.82933e-75	I1RFK9#PHI:1269#FGSG_02488#5518#Fusarium_graminearum#unaffected_pathogenicity	No definition line	57.1429
MHUMG1_50911	124	3.17132e-71	I1S8Y5#PHI:1434#GzC2H103#5518#Fusarium_graminearum#unaffected_pathogenicity	No definition line	57.1429
MHUMG1_9521	9	5.96318e-71	Q59M50#PHI:2562#Cwt1#5476#Candida_albicans#reduced_virulence	No definition line	57.1429
MHUMG1_87081	254	1.23722e-68	I1RHA1#PHI:1270#FGSG_03146#5518#Fusarium_graminearum#unaffected_pathogenicity	No definition line	57.1429
MHUMG1_22021	113	2.59992e-67	Q10896#PHI:8603#nrp_(Rv0101)#1773#Mycobacterium_tuberculosis#reduced_virulence	No definition line	57.1429
MHUMG1_21851	14	3.174e-54	P29138#PHI:4615#Pr1#5530#Metarhizium_anisopliae#unaffected_pathogenicity	No definition line	57.1429
MHUMG1_57231	11	2.54229e-49	I1RYK8#PHI:1847#GzZC162#5518#Fusarium_graminearum#unaffected_pathogenicity	No definition line	57.1429
MHUMG1_24141	10	3.87598e-48	Q5NH02#PHI:4732#FTT0673p/prsAp#263#Francisella_tularensis#unaffected_pathogenicity	No definition line	57.1429
MHUMG1_57041	274	5.24928e-43	I1RFK9#PHI:1269#FGSG_02488#5518#Fusarium_graminearum#unaffected_pathogenicity	No definition line	57.1429
MHUMG1_43831	12	8.23112e-41	G4MV34#PHI:8049#Siz1#318829#Magnaporthe_oryzae#reduced_virulence	No definition line	57.1429
MHUMG1_36211	6	3.05441e-38	I1RDG6#PHI:1555#GzMyb019#5518#Fusarium_graminearum#unaffected_pathogenicity	No definition line	57.1429
MHUMG1_86581	40	8.79409e-38	G4N1P8#PHI:5440#ABA4#318829#Magnaporthe_oryzae#reduced_virulence	No definition line	57.1429
MHUMG1_37001	284	1.03051e-28	I1R9B9#PHI:1998#GzZC313#5518#Fusarium_graminearum#unaffected_pathogenicity	No definition line	57.1429
MHUMG1_75211	17	3.07041e-27	G2XD68#PHI:8858#VdSSEP1_(VDAG-08100)#27337#Verticillium_dahliae#reduced_virulence	No definition line	57.1429
MHUMG1_38281	31	1.09314e-21	A0A0D2XVZ5#PHI:5236#Dnj1#5507#Fusarium_oxysporum#reduced_virulence	No definition line	57.1429
MHUMG1_81661	11	1.32232e-19	P0AA28#PHI:2644#thioredoxin_1#28901#Salmonella_enterica#reduced_virulence	No definition line	57.1429
MHUMG1_49311	24	2.29044e-19	G4N134#PHI:5606#FZC15#318829#Magnaporthe_oryzae#unaffected_pathogenicity	No definition line	57.1429
MHUMG1_85961	8	1.25805e-18	I1RHZ6#PHI:1887#GzZC202#5518#Fusarium_graminearum#unaffected_pathogenicity	No definition line	57.1429
MHUMG1_34971	39	4.53842e-17	P87025#PHI:59#THR1#5462#Colletotrichum_lagenaria#reduced_virulence	No definition line	57.1429
MHUMG1_64061	33	1.58481e-16	A0A0H6FRN3#PHI:6701#gntK#666#Vibrio_cholerae#reduced_virulence	No definition line	57.1429
MHUMG1_100171	258	8.37161e-15	I1RER7#PHI:1930#GzZC245#5518#Fusarium_graminearum#unaffected_pathogenicity	No definition line	57.1429
MHUMG1_98851	8	1.64173e-14	Q59VQ3#PHI:262#MAD2#5476#Candida_albicans#reduced_virulence	No definition line	57.1429
MHUMG1_39221	13	1.00006e-13	G4MLK2#PHI:8040__PHI:8047#Mouba2__Uba2#318829#Magnaporthe_oryzae#reduced_virulence	No definition line	57.1429
MHUMG1_84001	46	1.62826e-11	P0CY27#PHI:6783__PHI:6789__PHI:6811#sap1#5476#Candida_albicans#reduced_virulence__unaffected_pathogenicity	No definition line	57.1429
MHUMG1_74051	32	9.18766e-11	A0A290WFC9#PHI:7708#VEDA_05198#27337#Verticillium_dahliae#reduced_virulence__unaffected_pathogenicity__increased_virulence_(hypervirulence)	No definition line	57.1429
MHUMG1_6511	21	1.25673e-09	Q0PND8#PHI:593#PEX6#318829#Magnaporthe_oryzae#loss_of_pathogenicity	No definition line	57.1429
MHUMG1_76241	116	5.25817e-09	I1S2J8#PHI:9037#fgm4_(FGSG_10994)#5518#Fusarium_graminearum#reduced_virulence	No definition line	57.1429
MHUMG1_67941	11	1.61598e-07	Q4V006#PHI:3947#XC_0281#339#Xanthomonas_campestris#reduced_virulence	No definition line	57.1429
MHUMG1_82351	14	0	G4N740#PHI:4024#MoST1#318829#Magnaporthe_oryzae#unaffected_pathogenicity	No definition line	57.0502
MHUMG1_40481	236	5.17693e-63	I1R9J1#PHI:1271#FGSG_00132#5518#Fusarium_graminearum#unaffected_pathogenicity	No definition line	56.9767
MHUMG1_54091	7	6.354e-134	Q5A5P7#PHI:4891#orf19.5352#5476#Candida_albicans#unaffected_pathogenicity	No definition line	56.9554
MHUMG1_28041	15	0	Q2KN79#PHI:522__PHI:2808#GAS1__gas1#5507#Fusarium_oxysporum#reduced_virulence	No definition line	56.9196
MHUMG1_25591	20	0	G2XD29#PHI:2731#VdSge1#27337#Verticillium_dahliae#loss_of_pathogenicity	No definition line	56.912
MHUMG1_14241	8	1.43865e-161	I1S9T2#PHI:1623#GzJUM005#5518#Fusarium_graminearum#unaffected_pathogenicity	No definition line	56.8807
MHUMG1_9241	23	6.31432e-14	Q8Y8N0#PHI:6510__PHI:7620#CshA__Lmo0866#1639#Listeria_monocytogenes#unaffected_pathogenicity__increased_virulence_(hypervirulence)	No definition line	56.8627
MHUMG1_44231	7	0	Q6Y392#PHI:1085#Ptr2#13684#Parastagonospora_nodorum#unaffected_pathogenicity	No definition line	56.8562
MHUMG1_25161	11	1.11541e-108	G4NFA1#PHI:6930#MoRAD18#318829#Magnaporthe_oryzae#unaffected_pathogenicity	No definition line	56.8182
MHUMG1_22611	2	2.92642e-143	Q0U6E8#PHI:2249__PHI:2270#Mpd1#13684#Parastagonospora_nodorum#unaffected_pathogenicity	No definition line	56.8123
MHUMG1_80751	7	2.58577e-63	I1R9Z0#PHI:1469#GzHMG001#5518#Fusarium_graminearum#unaffected_pathogenicity	No definition line	56.7568
MHUMG1_86161	18	7.90999e-38	C5P3X6#PHI:479#MEP1#199306#Coccidioides_posadasii#reduced_virulence	No definition line	56.7568
MHUMG1_23141	257	1.93589e-28	I1RJA3#PHI:1881#GzZC196#5518#Fusarium_graminearum#unaffected_pathogenicity	No definition line	56.7568
MHUMG1_15391	256	6.75514e-08	D1FVE6#PHI:5038#OpS3#176275#Beauveria_bassiana#increased_virulence_(hypervirulence)	No definition line	56.7568
MHUMG1_18851	8	4.3711e-06	G4MS03#PHI:2006__PHI:2008#HST1#318829#Magnaporthe_oryzae#unaffected_pathogenicity	No definition line	56.7568
MHUMG1_25491	10	0	G4NII5#PHI:2094#Yvc1#318829#Magnaporthe_oryzae#reduced_virulence__loss_of_pathogenicity	No definition line	56.7485
MHUMG1_52491	251	2.3206e-109	I1RWQ2#PHI:1235#FGSG_08731#5518#Fusarium_graminearum#lethal	No definition line	56.7114
MHUMG1_39851	469	0	I1RPF6#PHI:1878#GzZC193#5518#Fusarium_graminearum#unaffected_pathogenicity	No definition line	56.6667
MHUMG1_57821	101	0	F9XQ63#PHI:8597#ZtPks8#1047171#Zymoseptoria_tritici#unaffected_pathogenicity	No definition line	56.6667
MHUMG1_37181	257	3.97811e-163	G4N1K5#PHI:5641#FZC44#318829#Magnaporthe_oryzae#unaffected_pathogenicity	No definition line	56.6667
MHUMG1_105171	14	2.74071e-34	Q9P304#PHI:199#AOX1#5499#Passalora_fulva#reduced_virulence	No definition line	56.6667
MHUMG1_77271	10	4.15733e-109	Q4WWN9#PHI:2518#MET16#746128#Aspergillus_fumigatus#lethal	No definition line	56.5836
MHUMG1_3461	24	1.67175e-78	I1RVS7#PHI:1792#GzZC107#5518#Fusarium_graminearum#unaffected_pathogenicity	No definition line	56.5836
MHUMG1_18811	5	0	Q4W9S1#PHI:6557#cysB#746128#Aspergillus_fumigatus#unaffected_pathogenicity__reduced_virulence	No definition line	56.5714
MHUMG1_31	237	0	Q6ZX14#PHI:325#ACE1#318829#Magnaporthe_oryzae#effector_(plant_avirulence_determinant)	No definition line	56.5217
MHUMG1_72471	75	0	I1S2J9#PHI:3924__PHI:8224__PHI:9036#FgABC1__Fg10995__fgm5_(FGSG_10995)#5518#Fusarium_graminearum#reduced_virulence	No definition line	56.5217
MHUMG1_72701	7	0	G4NBI7#PHI:2028#TGL1-2#318829#Magnaporthe_oryzae#unaffected_pathogenicity	No definition line	56.5217
MHUMG1_18311	197	7.85436e-159	I1SAJ7#PHI:9042#nrps5_(FGSG_13878)#5518#Fusarium_graminearum#reduced_virulence	No definition line	56.5217
MHUMG1_35451	22	1.43978e-50	A0ST45#PHI:1048#CTB7#29003#Cercospora_nicotianae#reduced_virulence	No definition line	56.5217
MHUMG1_37481	33	5.67601e-44	L2G011#PHI:3973#ASP#474922#Colletotrichum_gloeosporioides#reduced_virulence	No definition line	56.5217
MHUMG1_66661	14	5.03016e-39	Q5A7M9#PHI:4992#rhr2#5476#Candida_albicans#reduced_virulence	No definition line	56.5217
MHUMG1_33001	9	1.13074e-26	Q6PWQ1#PHI:2510#msdS/AfmsdC#746128#Aspergillus_fumigatus#unaffected_pathogenicity	No definition line	56.5217
MHUMG1_25401	5	3.14201e-21	Q2FH26#PHI:7353#odhB#1280#Staphylococcus_aureus#unaffected_pathogenicity	No definition line	56.5217
MHUMG1_37141	27	3.26219e-20	B9JV05#PHI:2895#F-avi4330#373#Agrobacterium_vitis#loss_of_pathogenicity	No definition line	56.5217
MHUMG1_94961	7	3.02793e-17	Q5AF03#PHI:8693#GLX3#5476#Candida_albicans#loss_of_pathogenicity	No definition line	56.5217
MHUMG1_86791	9	3.79212e-13	P01555#PHI:698#CtxA#666#Vibrio_cholerae#reduced_virulence	No definition line	56.5217
MHUMG1_4871	28	1.76663e-12	Q12634#PHI:685__PHI:2022#BUF__BUF1#318829#Magnaporthe_oryzae#loss_of_pathogenicity	No definition line	56.5217
MHUMG1_77561	16	2.61132e-08	G4MZ98#PHI:5186#MoAPX2#318829#Magnaporthe_oryzae#reduced_virulence	No definition line	56.5217
MHUMG1_5311	30	3.34081e-07	P87025#PHI:59#THR1#5462#Colletotrichum_lagenaria#reduced_virulence	No definition line	56.5217
MHUMG1_43401	13	1.47094e-93	Q4IMZ7#PHI:1673#GzDHHC001#5518#Fusarium_graminearum#unaffected_pathogenicity	No definition line	56.5041
MHUMG1_33801	12	0	I1RQN6#PHI:1974#GzZC289#5518#Fusarium_graminearum#unaffected_pathogenicity	No definition line	56.4756
MHUMG1_32751	9	0	I1S0H5#PHI:7717#FgOXP1#5518#Fusarium_graminearum#reduced_virulence	No definition line	56.4528
MHUMG1_72651	21	2.19442e-15	Q705V7#PHI:526__PHI:1071#GAS1__Gas1#5270#Ustilago_maydis#reduced_virulence__loss_of_pathogenicity	No definition line	56.4516
MHUMG1_78881	8	0	I1RPI4#PHI:1002#GCS1#5518#Fusarium_graminearum#reduced_virulence__unaffected_pathogenicity	No definition line	56.4378
MHUMG1_76931	7	0	I1RWB8#PHI:1402#GzC2H065#5518#Fusarium_graminearum#unaffected_pathogenicity	No definition line	56.4341
MHUMG1_73611	253	0	I1RDX3#PHI:1254#FGSG_01842#5518#Fusarium_graminearum#unaffected_pathogenicity	No definition line	56.4214
MHUMG1_33311	144	3.29996e-170	I1RQL4#PHI:1165__PHI:1642__PHI:3109#RRG2__GzWing014__FgSKN7#5518#Fusarium_graminearum#unaffected_pathogenicity__reduced_virulence	No definition line	56.3851
MHUMG1_82091	34	2.03263e-26	I1RU67#PHI:1392#GzC2H055#5518#Fusarium_graminearum#unaffected_pathogenicity	No definition line	56.3636
MHUMG1_96861	14	4.76224e-99	P29138#PHI:4615#Pr1#5530#Metarhizium_anisopliae#unaffected_pathogenicity	No definition line	56.25
MHUMG1_73601	70	8.21963e-80	I1RP68#PHI:5863#GCD11#5518#Fusarium_graminearum#unaffected_pathogenicity	No definition line	56.25
MHUMG1_47511	43	1.37702e-64	I1RZ96#PHI:1751#GzZC066#5518#Fusarium_graminearum#unaffected_pathogenicity	No definition line	56.25
MHUMG1_52181	85	2.80182e-43	G4MVA4#PHI:5593#FZC4#318829#Magnaporthe_oryzae#unaffected_pathogenicity	No definition line	56.25
MHUMG1_102201	20	8.54297e-24	Q9P304#PHI:199#AOX1#5499#Passalora_fulva#reduced_virulence	No definition line	56.25
MHUMG1_57541	11	3.474e-23	I1RG88#PHI:7649#FgPR-IL-2#5518#Fusarium_graminearum#unaffected_pathogenicity	No definition line	56.25
MHUMG1_5901	95	9.73937e-12	B2SRG1#PHI:1141#raxB#347#Xanthomonas_oryzae#increased_virulence_(hypervirulence)	No definition line	56.25
MHUMG1_13531	7	1.24545e-09	W7N2B2#PHI:3388#FVEG_12522#117187#Fusarium_verticillioides#unaffected_pathogenicity	No definition line	56.25
MHUMG1_12791	67	0	Q4X006#PHI:4229#abcA#746128#Aspergillus_fumigatus#unaffected_pathogenicity	No definition line	56.2439
MHUMG1_68441	6	8.58248e-130	Q8XW15#PHI:8884#aroG1#305#Ralstonia_solanacearum#loss_of_pathogenicity	No definition line	56.2147
MHUMG1_91701	34	3.20247e-65	I1S0W0#PHI:1417#GzC2H084#5518#Fusarium_graminearum#unaffected_pathogenicity	No definition line	56.213
MHUMG1_82391	8	4.24655e-99	Q5A5P7#PHI:4891#orf19.5352#5476#Candida_albicans#unaffected_pathogenicity	No definition line	56.2016
MHUMG1_53691	24	0	Q4WZP3#PHI:8875#gefA_(Afu2g16240)#746128#Aspergillus_fumigatus#unaffected_pathogenicity__loss_of_pathogenicity	No definition line	56.1969
MHUMG1_84311	7	1.37418e-111	Q5ANA8#PHI:6795#CaMCA1#5476#Candida_albicans#reduced_virulence	No definition line	56.1905
MHUMG1_14961	18	4.7053e-38	G4MWU9#PHI:2019#MoPLC3#318829#Magnaporthe_oryzae#loss_of_pathogenicity	No definition line	56.1404
MHUMG1_88361	6	1.63435e-164	I1RDZ2#PHI:5809#Fgsg01861#5518#Fusarium_graminearum#unaffected_pathogenicity	No definition line	56.0364
MHUMG1_79911	7	0	P42375#PHI:3085#GroEL#837#Porphyromonas_gingivalis#increased_virulence_(hypervirulence)	No definition line	56
MHUMG1_98691	862	0	Q01886#PHI:12#HTS1#5017#Bipolaris_zeicola#loss_of_pathogenicity	No definition line	56
MHUMG1_89461	8	8.24163e-88	I1S462#PHI:1336#GzbZIP018#5518#Fusarium_graminearum#unaffected_pathogenicity	No definition line	56
MHUMG1_54461	36	2.95446e-57	P0CY27#PHI:6783__PHI:6789__PHI:6811#sap1#5476#Candida_albicans#reduced_virulence__unaffected_pathogenicity	No definition line	56
MHUMG1_99261	22	2.39402e-41	B1GVX4#PHI:2289#BcBOA2#40559#Botrytis_cinerea#reduced_virulence	No definition line	56
MHUMG1_23831	36	3.05746e-36	I1RC95#PHI:1566#GzOB006#5518#Fusarium_graminearum#lethal	No definition line	56
MHUMG1_100931	155	1.01374e-34	C4YFX2#PHI:211__PHI:6806#CaTUP1__tup1#5476#Candida_albicans#reduced_virulence	No definition line	56
MHUMG1_101611	34	1.66176e-25	Q8NJS2#PHI:697#ugt51E1#5022#Leptosphaeria_maculans#unaffected_pathogenicity	No definition line	56
MHUMG1_99931	14	8.69875e-24	G8BJ74#PHI:6075#och1#5480#Candida_parapsilosis#reduced_virulence	No definition line	56
MHUMG1_105671	32	1.23844e-15	I1S2J3#PHI:9041#fgm9_(FGSG_10989)#5518#Fusarium_graminearum#reduced_virulence	No definition line	56
MHUMG1_77421	12	7.40111e-11	I1S172#PHI:1420#GzC2H088#5518#Fusarium_graminearum#unaffected_pathogenicity	No definition line	56
MHUMG1_91631	6	1.06103e-09	A0A095CIZ4#PHI:6188#Ubp5#552467#Cryptococcus_gattii_vgiii#reduced_virulence	No definition line	56
MHUMG1_105051	18	1.00713e-08	I1S172#PHI:1420#GzC2H088#5518#Fusarium_graminearum#unaffected_pathogenicity	No definition line	56
MHUMG1_104421	255	2.34426e-07	I1R9B9#PHI:1998#GzZC313#5518#Fusarium_graminearum#unaffected_pathogenicity	No definition line	56
MHUMG1_76431	91	1.6554e-06	I1S4X3#PHI:1843#GzZC158#5518#Fusarium_graminearum#unaffected_pathogenicity	No definition line	56
MHUMG1_49621	16	2.43564e-27	I1S4Q3#PHI:1756#GzZC071#5518#Fusarium_graminearum#unaffected_pathogenicity	No definition line	55.914
MHUMG1_88281	311	2.85217e-64	I1RHN3#PHI:1905#GzZC220#5518#Fusarium_graminearum#unaffected_pathogenicity	No definition line	55.8824
MHUMG1_42371	7	6.88219e-09	I1RW90#PHI:1627#GzTF2S002#5518#Fusarium_graminearum#unaffected_pathogenicity	No definition line	55.8824
MHUMG1_62031	9	2.07371e-93	I1RS27#PHI:1383#GzC2H046#5518#Fusarium_graminearum#unaffected_pathogenicity	No definition line	55.8491
MHUMG1_28461	10	1.44666e-151	G4MV25#PHI:6711#gel1#318829#Magnaporthe_oryzae#unaffected_pathogenicity__loss_of_pathogenicity	No definition line	55.8442
MHUMG1_98801	126	0	Q4WZA8#PHI:6891#pksP#746128#Aspergillus_fumigatus#reduced_virulence__unaffected_pathogenicity	No definition line	55.8282
MHUMG1_9891	336	2.72683e-58	I1S5J4#PHI:1866#GzZC181#5518#Fusarium_graminearum#unaffected_pathogenicity	No definition line	55.8282
MHUMG1_40201	14	1.29971e-61	Q4WCZ1#PHI:2969#argEF#746128#Aspergillus_fumigatus#reduced_virulence	No definition line	55.8011
MHUMG1_61151	8	1.21927e-109	Q4WPM7#PHI:6146#HorA#746128#Aspergillus_fumigatus#reduced_virulence	No definition line	55.7491
MHUMG1_76331	7	6.44461e-173	Q4WEN8#PHI:2522#SPE2#746128#Aspergillus_fumigatus#lethal	No definition line	55.706
MHUMG1_13411	25	0	Q9P8L8#PHI:544#BCMFS1#40559#Botrytis_cinerea#unaffected_pathogenicity	No definition line	55.6777
MHUMG1_58381	8	0	A0A098DMJ4#PHI:5801#Fgsg04628#5518#Fusarium_graminearum#unaffected_pathogenicity	No definition line	55.6738
MHUMG1_55351	6	0	Q9HF03#PHI:280#CCN1#5207#Cryptococcus_neoformans#reduced_virulence	No definition line	55.6391
MHUMG1_9571	4	0	G4MQZ9#PHI:2025#HDL1#318829#Magnaporthe_oryzae#unaffected_pathogenicity	No definition line	55.6358
MHUMG1_102061	120	0	I1RGC8#PHI:1838#GzZC153#5518#Fusarium_graminearum#unaffected_pathogenicity	No definition line	55.6075
MHUMG1_78171	252	0	G4N170#PHI:5682#FZC78#318829#Magnaporthe_oryzae#unaffected_pathogenicity	No definition line	55.5556
MHUMG1_90241	192	3.87447e-150	Q9UVN5#PHI:160#AMT#5599#Alternaria_alternata#loss_of_pathogenicity	No definition line	55.5556
MHUMG1_18481	112	1.22086e-124	Q96VB5#PHI:508#AFT1#5599#Alternaria_alternata#loss_of_pathogenicity	No definition line	55.5556
MHUMG1_63751	11	1.04213e-118	Q4WBL9#PHI:4672#AmcA#746128#Aspergillus_fumigatus#unaffected_pathogenicity	No definition line	55.5556
MHUMG1_79601	240	1.46685e-107	I1S6C7#PHI:1730#GzZC045#5518#Fusarium_graminearum#unaffected_pathogenicity	No definition line	55.5556
MHUMG1_92331	296	5.1955e-45	I1RBN6#PHI:1799#GzZC114#5518#Fusarium_graminearum#unaffected_pathogenicity	No definition line	55.5556
MHUMG1_50591	28	4.8822e-43	Q32WF7#PHI:2269#Mdh1#13684#Parastagonospora_nodorum#unaffected_pathogenicity	No definition line	55.5556
MHUMG1_4531	15	2.16737e-42	P83776#PHI:8970#Cahxk2#5476#Candida_albicans#reduced_virulence	No definition line	55.5556
MHUMG1_57141	17	1.20677e-41	D3QJB2#PHI:3526#lacA#28901#Salmonella_enterica#reduced_virulence	No definition line	55.5556
MHUMG1_94851	10	4.59512e-35	Q4UWM4#PHI:3965#XC_1481#339#Xanthomonas_campestris#reduced_virulence	No definition line	55.5556
MHUMG1_7331	104	3.80595e-30	A4RJV3#PHI:6135__PHI:6636#PEF1__MoMdv1#318829#Magnaporthe_oryzae#reduced_virulence	No definition line	55.5556
MHUMG1_79851	43	1.86951e-23	I1RQU2#PHI:1964#GzZC279#5518#Fusarium_graminearum#unaffected_pathogenicity	No definition line	55.5556
MHUMG1_3031	7	1.48177e-19	Q5K8C9#PHI:489#TRX1#5207#Cryptococcus_neoformans#reduced_virulence	No definition line	55.5556
MHUMG1_671	14	1.59036e-14	P29138#PHI:4615#Pr1#5530#Metarhizium_anisopliae#unaffected_pathogenicity	No definition line	55.5556
MHUMG1_94641	28	3.55231e-09	Q8Y0J2#PHI:5271#fabG1#305#Ralstonia_solanacearum#lethal	No definition line	55.5556
MHUMG1_42121	3	5.38855e-09	J9VZ15#PHI:7762#liv7_(cnag_06464)#5207#Cryptococcus_neoformans#reduced_virulence	No definition line	55.5556
MHUMG1_56091	65	1.44144e-07	Q4WQK8#PHI:6111#CpcB#746128#Aspergillus_fumigatus#reduced_virulence	No definition line	55.5556
MHUMG1_56301	12	2.86136e-07	Q882D2#PHI:3119#PSPTO_2696#317#Pseudomonas_syringae#unaffected_pathogenicity	No definition line	55.5556
MHUMG1_92341	241	4.1951e-07	I1RH59#PHI:1925#GzZC240#5518#Fusarium_graminearum#unaffected_pathogenicity	No definition line	55.5556
MHUMG1_96271	11	9.24092e-07	B2HHI1#PHI:3364#MMAR_1663#1781#Mycobacterium_marinum#reduced_virulence	No definition line	55.5556
MHUMG1_55821	7	4.69172e-148	G2YTS7#PHI:7722#BcDGAT2#40559#Botrytis_cinerea#reduced_virulence	No definition line	55.527
MHUMG1_75441	10	2.95086e-150	G4NGW8#PHI:3175#MoSnf4#318829#Magnaporthe_oryzae#loss_of_pathogenicity	No definition line	55.5035
MHUMG1_16661	5	5.19423e-122	G4NCK1#PHI:2149#MoLDB1#318829#Magnaporthe_oryzae#reduced_virulence__loss_of_pathogenicity	No definition line	55.496
MHUMG1_70241	5	1.27073e-165	G4ZAY8#PHI:5016#Psimpa1#67593#Phytophthora_sojae#reduced_virulence	No definition line	55.4865
MHUMG1_111	52	9.01478e-106	J4KL74#PHI:7381#Blys8#176275#Beauveria_bassiana#unaffected_pathogenicity	No definition line	55.4717
MHUMG1_50931	258	0	I1RWM5#PHI:1184__PHI:6974#(Sc_Gin4-like)__gil1#5518#Fusarium_graminearum#reduced_virulence	No definition line	55.4656
MHUMG1_29791	16	1.30368e-152	I1SAN0#PHI:1528#GzHOMEL041#5518#Fusarium_graminearum#unaffected_pathogenicity	No definition line	55.3957
MHUMG1_52741	6	0	G4NL37#PHI:893#MGG_02986#318829#Magnaporthe_oryzae#reduced_virulence	No definition line	55.3699
MHUMG1_3221	18	4.77937e-98	Q0UA24#PHI:2256#Xdh1#13684#Parastagonospora_nodorum#unaffected_pathogenicity	No definition line	55.3571
MHUMG1_99381	6	9.51589e-17	I1S2J9#PHI:3924__PHI:8224__PHI:9036#FgABC1__Fg10995__fgm5_(FGSG_10995)#5518#Fusarium_graminearum#reduced_virulence	No definition line	55.3571
MHUMG1_3131	7	2.01171e-120	Q8Y1E7#PHI:8885#aroG2#305#Ralstonia_solanacearum#unaffected_pathogenicity__loss_of_pathogenicity	No definition line	55.3314
MHUMG1_55461	10	0	J9W1N5#PHI:3527#PHO840#5207#Cryptococcus_neoformans#reduced_virulence	No definition line	55.2773
MHUMG1_59251	8	5.96455e-33	G4MU85#PHI:2045__PHI:2168#MoCDTF1__MGG_11346#318829#Magnaporthe_oryzae#loss_of_pathogenicity__reduced_virulence	No definition line	55.2632
MHUMG1_41091	15	2.55323e-66	G4N054#PHI:2018__PHI:2106#MoPLC2__MGG_05332.5#318829#Magnaporthe_oryzae#loss_of_pathogenicity__reduced_virulence	No definition line	55.1724
MHUMG1_72711	106	9.36609e-66	Q96VB5#PHI:508#AFT1#5599#Alternaria_alternata#loss_of_pathogenicity	No definition line	55.1724
MHUMG1_45571	17	1.21914e-37	A3RH09#PHI:3865#GOX2#27334#Penicillium_expansum#reduced_virulence	No definition line	55.1724
MHUMG1_65731	19	2.25056e-33	G4N0R9#PHI:5656#FZC58#318829#Magnaporthe_oryzae#unaffected_pathogenicity	No definition line	55.1724
MHUMG1_97141	7	1.44053e-09	W7N2B2#PHI:3388#FVEG_12522#117187#Fusarium_verticillioides#unaffected_pathogenicity	No definition line	55.1724
MHUMG1_25251	11	9.61388e-79	G4NIR9#PHI:806#MGG_04137#318829#Magnaporthe_oryzae#reduced_virulence	No definition line	55.1282
MHUMG1_31641	10	3.33408e-77	I1S0N5#PHI:1552#GzMyb016#5518#Fusarium_graminearum#unaffected_pathogenicity	No definition line	55.1282
MHUMG1_7231	7	9.45625e-27	E7Q5D7#PHI:5043#Hsp150p#4932#Saccharomyces_cerevisiae#increased_virulence_(hypervirulence)	No definition line	55.0562
MHUMG1_9141	14	0	I1RBL8#PHI:1631#GzWing003#5518#Fusarium_graminearum#unaffected_pathogenicity	No definition line	55.0505
MHUMG1_86331	10	7.62349e-173	J9VSX1#PHI:7186#ADE13#5207#Cryptococcus_neoformans#reduced_virulence	No definition line	55
MHUMG1_65811	115	1.25009e-113	I1RZZ5#PHI:1415#GzC2H082#5518#Fusarium_graminearum#unaffected_pathogenicity	No definition line	55
MHUMG1_2511	60	3.73271e-85	Q9P872#PHI:440#PMR1#5476#Candida_albicans#reduced_virulence	No definition line	55
MHUMG1_88051	153	1.08277e-80	I1REW1#PHI:1809#GzZC124#5518#Fusarium_graminearum#lethal	No definition line	55
MHUMG1_50511	3	1.33379e-57	Q4WJR9#PHI:6554#sB#746128#Aspergillus_fumigatus#unaffected_pathogenicity	No definition line	55
MHUMG1_72331	11	7.42818e-54	Q6PWQ1#PHI:2510#msdS/AfmsdC#746128#Aspergillus_fumigatus#unaffected_pathogenicity	No definition line	55
MHUMG1_32771	10	3.66251e-41	I1REJ1#PHI:1662#GzCCHC002#5518#Fusarium_graminearum#unaffected_pathogenicity	No definition line	55
MHUMG1_79771	8	2.64805e-40	Q00455#PHI:58#SCD1#5462#Colletotrichum_lagenaria#reduced_virulence	No definition line	55
MHUMG1_19581	6	6.36533e-40	C6KED4#PHI:1135#LmIFRD#5022#Leptosphaeria_maculans#loss_of_pathogenicity	No definition line	55
MHUMG1_100491	47	1.48026e-35	I1RL97#PHI:1862#GzZC177#5518#Fusarium_graminearum#unaffected_pathogenicity	No definition line	55
MHUMG1_99811	24	3.10232e-35	L2FHG9#PHI:3972#CDA#474922#Colletotrichum_gloeosporioides#unaffected_pathogenicity	No definition line	55
MHUMG1_86111	25	3.28148e-26	I1RHG6#PHI:1909#GzZC224#5518#Fusarium_graminearum#unaffected_pathogenicity	No definition line	55
MHUMG1_88171	69	9.27695e-25	I1RUC7#PHI:1260#FGSG_07816#5518#Fusarium_graminearum#unaffected_pathogenicity	No definition line	55
MHUMG1_3921	3	6.69055e-23	A0A0H2ZGI5#PHI:7297__PHI:7304#PhzF1__PhzF2#287#Pseudomonas_aeruginosa#reduced_virulence	No definition line	55
MHUMG1_99131	41	6.72862e-22	Q6WP49#PHI:438#BcBOT1_(CND5)#40559#Botrytis_cinerea#reduced_virulence	No definition line	55
MHUMG1_29931	13	6.94192e-17	Q5GFD3#PHI:413#MPD1#13684#Parastagonospora_nodorum#unaffected_pathogenicity	No definition line	55
MHUMG1_78391	4	4.43263e-15	A0A095CJ15#PHI:4557#Ure6#552467#Cryptococcus_gattii_vgiii#unaffected_pathogenicity	No definition line	55
MHUMG1_1791	93	7.71165e-09	W2E906#PHI:3274#dhbF#1464#Paenibacillus_larvae#unaffected_pathogenicity	No definition line	55
MHUMG1_65571	21	3.05463e-07	Q8PDI2#PHI:5404#pobA#339#Xanthomonas_campestris#reduced_virulence	No definition line	55
MHUMG1_36681	7	5.56913e-07	A0A0F6B1M0#PHI:7225#ydcR#28901#Salmonella_enterica#reduced_virulence	No definition line	55
MHUMG1_92531	5	1.46801e-06	G4N1N6#PHI:5191#TPX1#318829#Magnaporthe_oryzae#reduced_virulence	No definition line	55
MHUMG1_25701	31	1.67154e-06	J9VMW8#PHI:3457#PHO84#5207#Cryptococcus_neoformans#reduced_virulence	No definition line	55
MHUMG1_66621	12	6.03736e-06	Q9Y8A2#PHI:255#FUM1_(FUM5)#5127#Fusarium_fujikuroi#unaffected_pathogenicity	No definition line	55
MHUMG1_23961	6	0	A7U5U4#PHI:2058#LHS1#318829#Magnaporthe_oryzae#reduced_virulence	No definition line	54.9946
MHUMG1_7851	11	3.53666e-144	A0A076ZMY5#PHI:7520#VK055_1952#573#Klebsiella_pneumoniae#unaffected_pathogenicity	No definition line	54.9474
MHUMG1_16091	9	8.27909e-178	I1RE63#PHI:743#ARG2#5518#Fusarium_graminearum#reduced_virulence	No definition line	54.8803
MHUMG1_56471	26	0	I1RJQ3#PHI:1364#GzC2H024#5518#Fusarium_graminearum#reduced_virulence	No definition line	54.8689
MHUMG1_50371	14	5.54702e-35	A7EKI7#PHI:5583#FoxE2#5180#Sclerotinia_sclerotiorum#unaffected_pathogenicity	No definition line	54.8673
MHUMG1_76491	30	9.59693e-152	A0A290WI18#PHI:7706#VEDA_05196#27337#Verticillium_dahliae#reduced_virulence__unaffected_pathogenicity__increased_virulence_(hypervirulence)	No definition line	54.8454
MHUMG1_7511	15	0	Q4WMS3#PHI:2549#MAK5#746128#Aspergillus_fumigatus#lethal	No definition line	54.8443
MHUMG1_99481	9	5.26234e-21	Q9P304#PHI:199#AOX1#5499#Passalora_fulva#reduced_virulence	No definition line	54.8387
MHUMG1_9681	255	1.156e-07	I1RB21#PHI:1966#GzZC281#5518#Fusarium_graminearum#unaffected_pathogenicity	No definition line	54.8387
MHUMG1_61001	12	3.5646e-07	X5FD66#PHI:4525#PFP1#914237#Rhynchosporium_commune#reduced_virulence	No definition line	54.8387
MHUMG1_14381	11	0	Q5XTQ4#PHI:541#LIP1#40559#Botrytis_cinerea#unaffected_pathogenicity	No definition line	54.797
MHUMG1_103981	40	3.30342e-26	I1RJK1#PHI:5776#Fgsg04023#5518#Fusarium_graminearum#unaffected_pathogenicity	No definition line	54.7368
MHUMG1_34981	5	1.63962e-46	J9VMG2#PHI:4883#Kcs1#5207#Cryptococcus_neoformans#reduced_virulence__loss_of_pathogenicity	No definition line	54.6667
MHUMG1_54771	5	1.15665e-177	I1RHY5#PHI:6125__PHI:5716#FGSG_03402__ScOrtholog_PHO11#5518#Fusarium_graminearum#unaffected_pathogenicity	No definition line	54.6485
MHUMG1_93121	5	0	G4N492#PHI:2030#TGL3-1#318829#Magnaporthe_oryzae#unaffected_pathogenicity	No definition line	54.6351
MHUMG1_100591	6	1.7247e-52	A0A0D2YD74#PHI:5483#FTF1#5507#Fusarium_oxysporum#reduced_virulence	No definition line	54.5977
MHUMG1_31941	11	0	Q4WUL6#PHI:362__PHI:2520#LYSF__LYS4#746128#Aspergillus_fumigatus#loss_of_pathogenicity__lethal	No definition line	54.5833
MHUMG1_76771	63	0	W7MT31#PHI:3387#FVEG_12523#117187#Fusarium_verticillioides#unaffected_pathogenicity	No definition line	54.5455
MHUMG1_105801	134	3.11441e-177	I1R9K8#PHI:1717#GzZC032#5518#Fusarium_graminearum#unaffected_pathogenicity	No definition line	54.5455
MHUMG1_40401	87	6.48902e-153	I1S2J9#PHI:3924__PHI:8224__PHI:9036#FgABC1__Fg10995__fgm5_(FGSG_10995)#5518#Fusarium_graminearum#reduced_virulence	No definition line	54.5455
MHUMG1_77491	290	6.38192e-131	I1S584#PHI:1687#GzZC002#5518#Fusarium_graminearum#unaffected_pathogenicity	No definition line	54.5455
MHUMG1_73951	29	3.30622e-116	I1REJ1#PHI:1662#GzCCHC002#5518#Fusarium_graminearum#unaffected_pathogenicity	No definition line	54.5455
MHUMG1_84191	46	1.40717e-114	I1S2J5#PHI:9040#fgm1_(FGSG_10991)#5518#Fusarium_graminearum#reduced_virulence	No definition line	54.5455
MHUMG1_11881	8	8.53357e-87	I1RNX2#PHI:1894#GzZC209#5518#Fusarium_graminearum#unaffected_pathogenicity	No definition line	54.5455
MHUMG1_86141	15	9.504e-83	G4N740#PHI:4024#MoST1#318829#Magnaporthe_oryzae#unaffected_pathogenicity	No definition line	54.5455
MHUMG1_20431	16	8.27596e-70	J4UPL6#PHI:5394#mas5#176275#Beauveria_bassiana#loss_of_pathogenicity	No definition line	54.5455
MHUMG1_101751	5	1.83165e-65	I1RJ45#PHI:6120#FGSG_03846#5518#Fusarium_graminearum#reduced_virulence	No definition line	54.5455
MHUMG1_78841	8	4.67248e-60	I1RPI0#PHI:1640#GzWing012#5518#Fusarium_graminearum#unaffected_pathogenicity	No definition line	54.5455
MHUMG1_4611	6	9.14035e-55	A0A1D8PKM5#PHI:8896#Pem2_(C3_06570C_A)#5476#Candida_albicans#increased_virulence_(hypervirulence)	No definition line	54.5455
MHUMG1_36371	25	6.97546e-43	C3JXE8#PHI:2835#RED2#5016#Bipolaris_maydis#reduced_virulence	No definition line	54.5455
MHUMG1_18101	17	5.47856e-33	Q5A2T6#PHI:513#ARN1_(SIT1)#5476#Candida_albicans#unaffected_pathogenicity__reduced_virulence	No definition line	54.5455
MHUMG1_67921	9	1.31992e-30	G4MZY1#PHI:2034#MFP1#318829#Magnaporthe_oryzae#reduced_virulence	No definition line	54.5455
MHUMG1_42791	11	1.77083e-30	I1RHI8#PHI:6121#FGSG_03243#5518#Fusarium_graminearum#reduced_virulence	No definition line	54.5455
MHUMG1_86931	320	1.02657e-29	I1RRS3#PHI:1816#GzZC131#5518#Fusarium_graminearum#unaffected_pathogenicity	No definition line	54.5455
MHUMG1_29191	14	2.8493e-28	I1S828#PHI:1503#GzHMG035#5518#Fusarium_graminearum#unaffected_pathogenicity	No definition line	54.5455
MHUMG1_73111	51	7.35788e-16	Q5AND9#PHI:7009#arf2#5476#Candida_albicans#reduced_virulence	No definition line	54.5455
MHUMG1_97591	64	1.86319e-14	Q8DPC2#PHI:6319#potA#1313#Streptococcus_pneumoniae#reduced_virulence	No definition line	54.5455
MHUMG1_84661	251	3.19417e-14	Q8J2N0#PHI:301#foSNF1#5507#Fusarium_oxysporum#reduced_virulence	No definition line	54.5455
MHUMG1_60501	80	3.40955e-14	Q4WR83#PHI:2321#SidI#746128#Aspergillus_fumigatus#reduced_virulence	No definition line	54.5455
MHUMG1_97571	36	1.60566e-12	G2X6V8#PHI:6331#VdCYP1#27337#Verticillium_dahliae#loss_of_pathogenicity	No definition line	54.5455
MHUMG1_100911	3	1.58547e-11	Q4WW81#PHI:6256__PHI:7875#FleA#746128#Aspergillus_fumigatus#increased_virulence_(hypervirulence)	No definition line	54.5455
MHUMG1_10801	4	3.11163e-11	P52751#PHI:15#MPG1#318829#Magnaporthe_oryzae#reduced_virulence	No definition line	54.5455
MHUMG1_81271	15	5.63038e-11	A0A0J9ULI2#PHI:7683#nit2#5507#Fusarium_oxysporum#unaffected_pathogenicity	No definition line	54.5455
MHUMG1_40071	22	7.92552e-11	Q0UA24#PHI:2256#Xdh1#13684#Parastagonospora_nodorum#unaffected_pathogenicity	No definition line	54.5455
MHUMG1_55631	3	1.40606e-08	I1RCK8#PHI:1477#GzHMG009#5518#Fusarium_graminearum#unaffected_pathogenicity	No definition line	54.5455
MHUMG1_83631	8	4.65544e-08	P0AA28#PHI:2644#thioredoxin_1#28901#Salmonella_enterica#reduced_virulence	No definition line	54.5455
MHUMG1_46081	9	1.39478e-07	Q4WBL9#PHI:4672#AmcA#746128#Aspergillus_fumigatus#unaffected_pathogenicity	No definition line	54.5455
MHUMG1_77801	7	4.40311e-07	A0A0H2XHD4#PHI:6628#bcaP#1280#Staphylococcus_aureus#unaffected_pathogenicity__reduced_virulence	No definition line	54.5455
MHUMG1_36081	260	5.72176e-07	I1RC69#PHI:1934#GzZC249#5518#Fusarium_graminearum#unaffected_pathogenicity	No definition line	54.5455
MHUMG1_81351	16	0	C4YR40#PHI:4904#Glr1#5476#Candida_albicans#reduced_virulence	No definition line	54.5272
MHUMG1_71941	13	3.78947e-110	I1S1F0#PHI:8669#FgKP4L-4_(FGSG_10551)#5518#Fusarium_graminearum#reduced_virulence	No definition line	54.4803
MHUMG1_33371	2	5.83667e-17	Q1XEW2#PHI:6963#cipC#746128#Aspergillus_fumigatus#reduced_virulence	No definition line	54.4304
MHUMG1_52761	10	0	G5EHD3#PHI:3014#MoAND1#318829#Magnaporthe_oryzae#reduced_virulence	No definition line	54.3812
MHUMG1_37731	49	0	I1REN7#PHI:1681#GzNF001#5518#Fusarium_graminearum#unaffected_pathogenicity	No definition line	54.3659
MHUMG1_49721	15	0	J9VMW8#PHI:3457#PHO84#5207#Cryptococcus_neoformans#reduced_virulence	No definition line	54.3353
MHUMG1_100521	10	0	Q4WQI8#PHI:4603#KexB#746128#Aspergillus_fumigatus#reduced_virulence	No definition line	54.2902
MHUMG1_29941	316	7.79115e-177	I1RXJ3#PHI:1851#GzZC166#5518#Fusarium_graminearum#lethal	No definition line	54.2857
MHUMG1_104871	19	0	J7MF98#PHI:2700#lac2#5465#Colletotrichum_orbiculare#reduced_virulence	No definition line	54.1667
MHUMG1_19641	256	3.09049e-156	I1S0N2#PHI:1849#GzZC164#5518#Fusarium_graminearum#unaffected_pathogenicity	No definition line	54.1667
MHUMG1_82451	10	3.46698e-150	O59928#PHI:144#CHT42#29875#Trichoderma_virens#reduced_virulence	No definition line	54.1667
MHUMG1_93151	12	1.75935e-51	A0A290WHN4#PHI:7704#VEDA_05194#27337#Verticillium_dahliae#reduced_virulence__unaffected_pathogenicity	No definition line	54.1667
MHUMG1_91251	4	7.7657e-25	Q8CWG4#PHI:3272#glpD#632#Yersinia_pestis#unaffected_pathogenicity	No definition line	54.1667
MHUMG1_78701	5	2.03715e-23	G4MRP7#PHI:803#MGG_04629#318829#Magnaporthe_oryzae#reduced_virulence	No definition line	54.1667
MHUMG1_100721	13	2.88977e-18	D4III8#PHI:2227#pao#5270#Ustilago_maydis#reduced_virulence__loss_of_pathogenicity	No definition line	54.1667
MHUMG1_45141	10	1.14196e-15	Q945T9#PHI:653#GIP2#67593#Phytophthora_sojae#effector_(plant_avirulence_determinant)	No definition line	54.1667
MHUMG1_97951	75	2.1255e-09	I1RUC7#PHI:1260#FGSG_07816#5518#Fusarium_graminearum#unaffected_pathogenicity	No definition line	54.1667
MHUMG1_94591	253	1.20795e-07	I1S6Y8#PHI:1734#GzZC049#5518#Fusarium_graminearum#unaffected_pathogenicity	No definition line	54.1667
MHUMG1_78831	34	2.59336e-07	Q4I8B6#PHI:1675#GzDHHC003#5518#Fusarium_graminearum#unaffected_pathogenicity	No definition line	54.1667
MHUMG1_96631	104	0	Q4WZA8#PHI:6891#pksP#746128#Aspergillus_fumigatus#reduced_virulence__unaffected_pathogenicity	No definition line	54.1512
MHUMG1_39031	15	9.07146e-94	I1RMP5#PHI:5806#Fgsg05239#5518#Fusarium_graminearum#unaffected_pathogenicity	No definition line	54.0984
MHUMG1_53271	91	7.37088e-164	Q8J214#PHI:346#CRU1#5270#Ustilago_maydis#reduced_virulence	No definition line	54.0948
MHUMG1_34661	231	7.93792e-164	Q63KU5#PHI:7014#glbC#28450#Burkholderia_pseudomallei#increased_virulence_(hypervirulence)	No definition line	54.0541
MHUMG1_93321	17	2.41784e-54	Q9Y7G8#PHI:407#PBC1#76659#Pyrenopeziza_brassicae#loss_of_pathogenicity	No definition line	54.0373
MHUMG1_61421	21	0	W7N2B4#PHI:3381#FVEG_12533#117187#Fusarium_verticillioides#unaffected_pathogenicity	No definition line	54.0293
MHUMG1_90151	1	3.16365e-07	G4NLK8#PHI:4962#TWL#318829#Magnaporthe_oryzae#reduced_virulence	No definition line	54
MHUMG1_9861	15	1.21283e-179	Q0V515#PHI:3914#Sdh1#13684#Parastagonospora_nodorum#reduced_virulence	No definition line	53.9957
MHUMG1_79871	3	0	N4W395#PHI:5040#BFA1#5465#Colletotrichum_orbiculare#reduced_virulence	No definition line	53.992
MHUMG1_31231	14	4.02068e-49	P0A1D7#PHI:3040#ClpP#28901#Salmonella_enterica#reduced_virulence	No definition line	53.9568
MHUMG1_32831	9	4.11137e-128	Q4WXL8#PHI:2538#AUR1#746128#Aspergillus_fumigatus#lethal__unaffected_pathogenicity	No definition line	53.9548
MHUMG1_26791	12	1.22653e-129	I1S5H3#PHI:1729#GzZC044#5518#Fusarium_graminearum#unaffected_pathogenicity	No definition line	53.9043
MHUMG1_33791	10	0	G4N1A3#PHI:2167#EXP5#318829#Magnaporthe_oryzae#reduced_virulence	No definition line	53.864
MHUMG1_20971	342	0	I1S832#PHI:1723#GzZC038#5518#Fusarium_graminearum#unaffected_pathogenicity	No definition line	53.8462
MHUMG1_35461	102	0	I1RF58#PHI:720#AUR1#5518#Fusarium_graminearum#unaffected_pathogenicity	No definition line	53.8462
MHUMG1_7791	141	8.7851e-147	I1RN12#PHI:1937#GzZC252#5518#Fusarium_graminearum#unaffected_pathogenicity	No definition line	53.8462
MHUMG1_6391	49	3.56796e-90	A0A0D5YKF1#PHI:8812#CopA_(ABUW_2707)#470#Acinetobacter_baumannii#unaffected_pathogenicity__reduced_virulence	No definition line	53.8462
MHUMG1_55331	179	6.72341e-79	I1RCI2#PHI:1350#GzC2H010#5518#Fusarium_graminearum#unaffected_pathogenicity	No definition line	53.8462
MHUMG1_52131	30	1.2771e-44	Q00663#PHI:17#ACP#5482#Candida_tropicalis#reduced_virulence	No definition line	53.8462
MHUMG1_45431	180	1.18936e-32	I1RHA1#PHI:1270#FGSG_03146#5518#Fusarium_graminearum#unaffected_pathogenicity	No definition line	53.8462
MHUMG1_89081	59	1.58004e-29	I1RUC7#PHI:1260#FGSG_07816#5518#Fusarium_graminearum#unaffected_pathogenicity	No definition line	53.8462
MHUMG1_45371	12	6.01988e-29	I1RZU0#PHI:1691#GzZC006#5518#Fusarium_graminearum#unaffected_pathogenicity	No definition line	53.8462
MHUMG1_74811	78	5.62869e-24	I1RUC7#PHI:1260#FGSG_07816#5518#Fusarium_graminearum#unaffected_pathogenicity	No definition line	53.8462
MHUMG1_89261	7	2.27685e-15	I1R983#PHI:1992#GzZC307#5518#Fusarium_graminearum#unaffected_pathogenicity	No definition line	53.8462
MHUMG1_49481	22	5.71088e-13	W7MT31#PHI:3387#FVEG_12523#117187#Fusarium_verticillioides#unaffected_pathogenicity	No definition line	53.8462
MHUMG1_47621	20	1.01295e-11	Q59RG0#PHI:511#CaNAG4#5476#Candida_albicans#reduced_virulence	No definition line	53.8462
MHUMG1_85021	5	5.04162e-10	I1RZD4#PHI:1413#GzC2H080#5518#Fusarium_graminearum#unaffected_pathogenicity	No definition line	53.8462
MHUMG1_40301	8	6.77695e-07	H1VQ06#PHI:8878#ChBUB2_(XP_018164413)#80884#Colletotrichum_higginsianum#reduced_virulence	No definition line	53.8462
MHUMG1_83841	25	0	W7N2B4#PHI:3381#FVEG_12533#117187#Fusarium_verticillioides#unaffected_pathogenicity	No definition line	53.8314
MHUMG1_65211	1	7.73634e-123	H8ZZ79#PHI:2710#mepB#474922#Colletotrichum_gloeosporioides#reduced_virulence	No definition line	53.8259
MHUMG1_77701	4	4.40978e-114	A0A0E0SA40#PHI:7025#FgRav2#5518#Fusarium_graminearum#loss_of_pathogenicity	No definition line	53.7572
MHUMG1_60141	17	0	G4MPI2#PHI:2009#HOS4#318829#Magnaporthe_oryzae#unaffected_pathogenicity	No definition line	53.7455
MHUMG1_67011	7	0	I1RSF8#PHI:1682#GzNF002#5518#Fusarium_graminearum#unaffected_pathogenicity	No definition line	53.7212
MHUMG1_97291	9	0	I1RM25#PHI:1579#GzOB019#5518#Fusarium_graminearum#unaffected_pathogenicity	No definition line	53.6434
MHUMG1_88851	2	2.53243e-61	I1S4R6#PHI:1501#GzHMG033#5518#Fusarium_graminearum#unaffected_pathogenicity	No definition line	53.5865
MHUMG1_69001	76	4.17335e-82	G4NI28#PHI:2100#Spf1#318829#Magnaporthe_oryzae#reduced_virulence__loss_of_pathogenicity	No definition line	53.5714
MHUMG1_31021	11	3.25459e-40	H9L477#PHI:663#spvB#28901#Salmonella_enterica#reduced_virulence	No definition line	53.5714
MHUMG1_95171	37	1.20239e-28	G7TIP9#PHI:4138#xrp14#347#Xanthomonas_oryzae#reduced_virulence	No definition line	53.5714
MHUMG1_89851	144	4.23256e-25	I1R9J1#PHI:1271#FGSG_00132#5518#Fusarium_graminearum#unaffected_pathogenicity	No definition line	53.5714
MHUMG1_85041	20	1.36971e-22	I1RZD4#PHI:1413#GzC2H080#5518#Fusarium_graminearum#unaffected_pathogenicity	No definition line	53.5714
MHUMG1_7871	7	6.51722e-19	I1S2C4#PHI:5068#MCC#5518#Fusarium_graminearum#reduced_virulence	No definition line	53.5714
MHUMG1_45171	139	3.29333e-10	I1RWQ2#PHI:1235#FGSG_08731#5518#Fusarium_graminearum#lethal	No definition line	53.5714
MHUMG1_19161	38	2.01578e-09	E9DS54#PHI:8769#MaPpt1#92637#Metarhizium_acridum#unaffected_pathogenicity	No definition line	53.5714
MHUMG1_85881	22	1.60283e-06	D4III8#PHI:2227#pao#5270#Ustilago_maydis#reduced_virulence__loss_of_pathogenicity	No definition line	53.5714
MHUMG1_103701	4	5.7908e-161	Q6PWQ1#PHI:2510#msdS/AfmsdC#746128#Aspergillus_fumigatus#unaffected_pathogenicity	No definition line	53.5497
MHUMG1_84511	6	7.88088e-73	G4MTK2#PHI:5232#MoARG1#318829#Magnaporthe_oryzae#loss_of_pathogenicity	No definition line	53.3981
MHUMG1_86551	167	0	E3QPY3#PHI:4217#NPS6#31870#Colletotrichum_graminicola#reduced_virulence	No definition line	53.3333
MHUMG1_99561	209	0	Q4WT66#PHI:2511#Pes1#746128#Aspergillus_fumigatus#reduced_virulence	No definition line	53.3333
MHUMG1_60651	12	3.07559e-134	I1RSX8#PHI:1795#GzZC110#5518#Fusarium_graminearum#unaffected_pathogenicity	No definition line	53.3333
MHUMG1_75451	10	2.38566e-110	G4NGW7#PHI:3067#MoRga7#318829#Magnaporthe_oryzae#unaffected_pathogenicity	No definition line	53.3333
MHUMG1_23641	6	3.65674e-68	I1S1Y4#PHI:1498#GzHMG030#5518#Fusarium_graminearum#lethal	No definition line	53.3333
MHUMG1_35871	259	2.37247e-66	I1RXS2#PHI:1759#GzZC074#5518#Fusarium_graminearum#unaffected_pathogenicity	No definition line	53.3333
MHUMG1_38891	25	4.01715e-65	I1S0X3#PHI:1776#GzZC091#5518#Fusarium_graminearum#unaffected_pathogenicity	No definition line	53.3333
MHUMG1_68511	32	7.59274e-47	C3JXE8#PHI:2835#RED2#5016#Bipolaris_maydis#reduced_virulence	No definition line	53.3333
MHUMG1_32761	204	1.19589e-39	I1RLT2#PHI:1956#GzZC271#5518#Fusarium_graminearum#unaffected_pathogenicity	No definition line	53.3333
MHUMG1_85431	133	9.72048e-29	I1S780#PHI:1741#GzZC056#5518#Fusarium_graminearum#unaffected_pathogenicity	No definition line	53.3333
MHUMG1_28821	5	2.41561e-22	I1S2R1#PHI:1423#GzC2H091#5518#Fusarium_graminearum#unaffected_pathogenicity	No definition line	53.3333
MHUMG1_32971	9	7.11022e-21	Q4WBL9#PHI:4672#AmcA#746128#Aspergillus_fumigatus#unaffected_pathogenicity	No definition line	53.3333
MHUMG1_11691	24	6.08986e-20	I1RG94#PHI:1322#GzbZIP004#5518#Fusarium_graminearum#unaffected_pathogenicity	No definition line	53.3333
MHUMG1_28891	10	3.3341e-17	A0A0H3KBS1#PHI:7917#NWMN_0826#1280#Staphylococcus_aureus#reduced_virulence	No definition line	53.3333
MHUMG1_40211	18	1.82925e-07	Q8J1Y3#PHI:409#BbCHIT1#176275#Beauveria_bassiana#increased_virulence_(hypervirulence)	No definition line	53.3333
MHUMG1_74691	12	3.55276e-07	I1S828#PHI:1503#GzHMG035#5518#Fusarium_graminearum#unaffected_pathogenicity	No definition line	53.3333
MHUMG1_53331	16	2.11619e-65	I1RE42#PHI:1541#GzFlbD#5518#Fusarium_graminearum#unaffected_pathogenicity	No definition line	53.2787
MHUMG1_30321	21	0	I1RNQ2#PHI:1170__PHI:1174#HDF3#5518#Fusarium_graminearum#unaffected_pathogenicity__reduced_virulence	No definition line	53.2468
MHUMG1_30641	46	0	G4MNA5#PHI:2096#Calcium-transporting_ATPase_3#318829#Magnaporthe_oryzae#loss_of_pathogenicity	No definition line	53.2258
MHUMG1_68551	9	3.90333e-83	I1RTN5#PHI:1549__PHI:2385#MYT2#5518#Fusarium_graminearum#unaffected_pathogenicity__reduced_virulence	No definition line	53.1977
MHUMG1_88731	6	6.27073e-127	I1RBB7#PHI:1475#GzHMG007#5518#Fusarium_graminearum#unaffected_pathogenicity	No definition line	53.1915
MHUMG1_103961	8	3.74872e-113	Q4I1J3#PHI:1677#GzDHHC005#5518#Fusarium_graminearum#unaffected_pathogenicity	No definition line	53.1915
MHUMG1_72501	252	0	I1RNK3#PHI:1259#FGSG_05586#5518#Fusarium_graminearum#unaffected_pathogenicity	No definition line	53.1489
MHUMG1_10761	44	0	Q7CIZ1#PHI:7573#MgtB#632#Yersinia_pestis#reduced_virulence	No definition line	53.125
MHUMG1_22171	15	1.18274e-104	P29138#PHI:4615#Pr1#5530#Metarhizium_anisopliae#unaffected_pathogenicity	No definition line	53.125
MHUMG1_13281	24	1.15415e-06	Q8PDI2#PHI:5404#pobA#339#Xanthomonas_campestris#reduced_virulence	No definition line	53.125
MHUMG1_8951	6	2.91404e-59	A7EB00#PHI:3936#Ss-caf1#5180#Sclerotinia_sclerotiorum#loss_of_pathogenicity	No definition line	53.1073
MHUMG1_84211	9	2.87895e-78	Q4WBL9#PHI:4672#AmcA#746128#Aspergillus_fumigatus#unaffected_pathogenicity	No definition line	53.1034
MHUMG1_23251	7	2.53074e-126	I1RFM2#PHI:3035#FgERG3A#5518#Fusarium_graminearum#reduced_virulence	No definition line	53.0973
MHUMG1_24341	11	4.60851e-116	A7F946#PHI:2411#Ss-ggt1#5180#Sclerotinia_sclerotiorum#reduced_virulence	No definition line	53.0769
MHUMG1_84181	1088	0	I1SAJ7#PHI:9042#nrps5_(FGSG_13878)#5518#Fusarium_graminearum#reduced_virulence	No definition line	53.0612
MHUMG1_47791	7	0	P87199#PHI:465#KIN2#5270#Ustilago_maydis#reduced_virulence	No definition line	53.001
MHUMG1_33881	7	0	I1RZJ1#PHI:1615#GzSGT1#5518#Fusarium_graminearum#unaffected_pathogenicity	No definition line	52.99
MHUMG1_39581	12	2.81515e-118	G4MRV1#PHI:873#MGG_02443#318829#Magnaporthe_oryzae#reduced_virulence	No definition line	52.9586
MHUMG1_62391	5	2.39518e-147	G4MRQ6#PHI:801__PHI:8650#MGG_04621__Poyth1_(MGG_04621)#318829#Magnaporthe_oryzae#reduced_virulence	No definition line	52.9545
MHUMG1_77021	63	2.76395e-173	G4N6T1#PHI:5671#FZC68#318829#Magnaporthe_oryzae#unaffected_pathogenicity	No definition line	52.9412
MHUMG1_97881	30	1.37555e-75	I1RQI0#PHI:1975#GzZC290#5518#Fusarium_graminearum#unaffected_pathogenicity	No definition line	52.9412
MHUMG1_17571	293	9.55958e-69	I1RXS2#PHI:1759#GzZC074#5518#Fusarium_graminearum#unaffected_pathogenicity	No definition line	52.9412
MHUMG1_35521	10	5.91821e-52	I1S0U2#PHI:1651#GzWing023#5518#Fusarium_graminearum#unaffected_pathogenicity	No definition line	52.9412
MHUMG1_100681	41	5.1751e-45	G2XIG8#PHI:7173#HiC-15#27337#Verticillium_dahliae#reduced_virulence	No definition line	52.9412
MHUMG1_2471	8	4.51351e-37	Q5ZUZ0#PHI:6382#iolG#446#Legionella_pneumophila#reduced_virulence	No definition line	52.9412
MHUMG1_76161	87	2.38614e-30	G4MWV1#PHI:5643#FZC46#318829#Magnaporthe_oryzae#unaffected_pathogenicity	No definition line	52.9412
MHUMG1_27881	34	1.44352e-26	Q9Y8A2#PHI:255#FUM1_(FUM5)#5127#Fusarium_fujikuroi#unaffected_pathogenicity	No definition line	52.9412
MHUMG1_9161	8	3.60096e-23	I1RFD7#PHI:1969#GzZC284#5518#Fusarium_graminearum#unaffected_pathogenicity	No definition line	52.9412
MHUMG1_63631	15	4.19154e-21	G4NCI6#PHI:6612#Mocapn9#318829#Magnaporthe_oryzae#unaffected_pathogenicity__reduced_virulence	No definition line	52.9412
MHUMG1_82061	6	2.24068e-10	Q6FV98#PHI:6626#CgTpo1_2#5478#Candida_glabrata#reduced_virulence	No definition line	52.9412
MHUMG1_101841	70	3.91118e-10	G4MUR7#PHI:4475#MoTup1#318829#Magnaporthe_oryzae#loss_of_pathogenicity	No definition line	52.9412
MHUMG1_21891	9	6.87861e-10	Q4V006#PHI:3947#XC_0281#339#Xanthomonas_campestris#reduced_virulence	No definition line	52.9412
MHUMG1_80361	106	8.35359e-10	G4MW86#PHI:5594#FZC5#318829#Magnaporthe_oryzae#unaffected_pathogenicity	No definition line	52.9412
MHUMG1_1311	27	5.02967e-08	A0A290WH42#PHI:7707#VEDA_05197#27337#Verticillium_dahliae#reduced_virulence__unaffected_pathogenicity__increased_virulence_(hypervirulence)	No definition line	52.9412
MHUMG1_62711	247	8.287e-158	I1S4X3#PHI:1843#GzZC158#5518#Fusarium_graminearum#unaffected_pathogenicity	No definition line	52.9167
MHUMG1_771	11	0	G4MZS7#PHI:800#MGG_13324#318829#Magnaporthe_oryzae#reduced_virulence	No definition line	52.8774
MHUMG1_18771	10	7.7814e-94	C5BF98#PHI:2959#mdh#67780#Edwardsiella_ictaluri#reduced_virulence	No definition line	52.8662
MHUMG1_102041	3	4.44349e-40	G5EHL4#PHI:9054#MoMCP1#318829#Magnaporthe_oryzae#reduced_virulence	No definition line	52.8302
MHUMG1_94191	201	3.59448e-09	W7MS18#PHI:3382#FVEG_12532#117187#Fusarium_verticillioides#unaffected_pathogenicity	No definition line	52.8302
MHUMG1_70751	8	0	I1RCE1#PHI:1568#GzOB008#5518#Fusarium_graminearum#unaffected_pathogenicity	No definition line	52.8169
MHUMG1_21061	5	2.38011e-112	Q59UR2#PHI:6214#MNN10#5476#Candida_albicans#reduced_virulence__unaffected_pathogenicity	No definition line	52.8053
MHUMG1_100201	85	0	Q96VL9#PHI:543#BCATRD#40559#Botrytis_cinerea#unaffected_pathogenicity	No definition line	52.7778
MHUMG1_94621	25	2.54946e-47	G2XD68#PHI:8858#VdSSEP1_(VDAG-08100)#27337#Verticillium_dahliae#reduced_virulence	No definition line	52.7778
MHUMG1_45381	21	1.86467e-07	A0A0C4DHR8#PHI:7682#nit1#5507#Fusarium_oxysporum#unaffected_pathogenicity	No definition line	52.7778
MHUMG1_46131	14	1.29443e-154	Q4JEX9#PHI:825#SE#5551#Trichophyton_rubrum#chemistry_target:_resistance_to_chemical	No definition line	52.7542
MHUMG1_43871	20	1.68218e-120	Q4WNM3#PHI:2552#NOP4#746128#Aspergillus_fumigatus#lethal	No definition line	52.7523
MHUMG1_64031	32	8.76075e-156	D4I229#PHI:7094__PHI:7438#clpV-2__EAMY__3222#552#Erwinia_amylovora#reduced_virulence__unaffected_pathogenicity__increased_virulence_(hypervirulence)	No definition line	52.7473
MHUMG1_85161	12	4.86185e-136	B0JFC8#PHI:2304#BCFHG1#40559#Botrytis_cinerea#unaffected_pathogenicity	No definition line	52.7316
MHUMG1_69151	5	1.38532e-87	Q5ABG1#PHI:2825#SET1#5476#Candida_albicans#reduced_virulence	No definition line	52.6646
MHUMG1_74901	1	0	Q4WEM7#PHI:2521#GUS1#746128#Aspergillus_fumigatus#lethal	No definition line	52.6523
MHUMG1_62291	11	1.34141e-86	E0SGC8#PHI:8570#metB_(Dda3937_03888)#204038#Dickeya_dadantii#reduced_virulence	No definition line	52.6316
MHUMG1_70741	7	1.23672e-79	G4MRS8#PHI:816#MGG_04582#318829#Magnaporthe_oryzae#reduced_virulence	No definition line	52.6316
MHUMG1_67361	9	1.51413e-45	G4MLK2#PHI:8040__PHI:8047#Mouba2__Uba2#318829#Magnaporthe_oryzae#reduced_virulence	No definition line	52.6316
MHUMG1_103391	18	4.28649e-41	Q5AP90#PHI:2886#MNN23#5476#Candida_albicans#reduced_virulence	No definition line	52.6316
MHUMG1_41611	5	4.51951e-34	G4N6P7#PHI:6902#MoAtg14#318829#Magnaporthe_oryzae#loss_of_pathogenicity	No definition line	52.6316
MHUMG1_60751	76	5.24457e-31	G2XIG8#PHI:7173#HiC-15#27337#Verticillium_dahliae#reduced_virulence	No definition line	52.6316
MHUMG1_58601	11	1.726e-23	Q945T9#PHI:653#GIP2#67593#Phytophthora_sojae#effector_(plant_avirulence_determinant)	No definition line	52.6316
MHUMG1_52981	253	3.8814e-23	I1RAA6#PHI:1256#FGSG_00433#5518#Fusarium_graminearum#unaffected_pathogenicity	No definition line	52.6316
MHUMG1_47951	15	1.43227e-18	I1S2F2#PHI:1500#GzHMG032#5518#Fusarium_graminearum#unaffected_pathogenicity	No definition line	52.6316
MHUMG1_99661	10	1.76528e-15	B0YAC2#PHI:7590#erg25A#746128#Aspergillus_fumigatus#unaffected_pathogenicity	No definition line	52.6316
MHUMG1_831	48	5.97072e-15	I1RUC7#PHI:1260#FGSG_07816#5518#Fusarium_graminearum#unaffected_pathogenicity	No definition line	52.6316
MHUMG1_5601	38	1.8667e-13	G4NLS4#PHI:5625#FZC31#318829#Magnaporthe_oryzae#unaffected_pathogenicity	No definition line	52.6316
MHUMG1_88111	229	3.04048e-10	G4NGK7#PHI:2161#Sep-01#318829#Magnaporthe_oryzae#loss_of_pathogenicity	No definition line	52.6316
MHUMG1_5821	5	1.07947e-06	I1RKU0#PHI:1087#FGSG_04510#5518#Fusarium_graminearum#unaffected_pathogenicity	No definition line	52.6316
MHUMG1_43311	16	4.80281e-06	Q02N79#PHI:3290#pqsH#287#Pseudomonas_aeruginosa#reduced_virulence	No definition line	52.6316
MHUMG1_2651	22	1.42579e-179	I1RV74#PHI:1399#GzC2H062#5518#Fusarium_graminearum#unaffected_pathogenicity	No definition line	52.6158
MHUMG1_6631	5	2.78177e-170	G4ND25#PHI:2488#Man1#318829#Magnaporthe_oryzae#unaffected_pathogenicity	No definition line	52.6104
MHUMG1_76471	16	1.24981e-129	P29138#PHI:4615#Pr1#5530#Metarhizium_anisopliae#unaffected_pathogenicity	No definition line	52.5606
MHUMG1_55581	14	0	G4MPJ4#PHI:4053#Pax1#318829#Magnaporthe_oryzae#loss_of_pathogenicity	No definition line	52.546
MHUMG1_88261	8	7.43451e-180	Q5XTQ4#PHI:541#LIP1#40559#Botrytis_cinerea#unaffected_pathogenicity	No definition line	52.5458
MHUMG1_67441	12	0	G4MR33#PHI:6396#MoMNR2#318829#Magnaporthe_oryzae#reduced_virulence	No definition line	52.534
MHUMG1_100461	75	0	I1S4E2#PHI:1737#GzZC052#5518#Fusarium_graminearum#unaffected_pathogenicity	No definition line	52.5203
MHUMG1_51131	4	7.18529e-151	I1RWN5#PHI:1550#GzMyb014#5518#Fusarium_graminearum#unaffected_pathogenicity	No definition line	52.459
MHUMG1_15071	8	0	G4NCF7#PHI:2138#SGA1#318829#Magnaporthe_oryzae#unaffected_pathogenicity__loss_of_pathogenicity	No definition line	52.4535
MHUMG1_46561	103	1.43792e-176	I1S7R2#PHI:1275#FGSG_12887#5518#Fusarium_graminearum#unaffected_pathogenicity	No definition line	52.439
MHUMG1_92971	95	0	I1RXV6#PHI:722#PGL1#5518#Fusarium_graminearum#unaffected_pathogenicity	No definition line	52.4032
MHUMG1_21911	101	0	I1S2J9#PHI:3924__PHI:8224__PHI:9036#FgABC1__Fg10995__fgm5_(FGSG_10995)#5518#Fusarium_graminearum#reduced_virulence	No definition line	52.381
MHUMG1_21901	21	1.90793e-106	Q882F5#PHI:7788#AldB_(PSPTO_2673)#317#Pseudomonas_syringae#reduced_virulence	No definition line	52.381
MHUMG1_85901	169	1.33814e-105	Q63KU5#PHI:7014#glbC#28450#Burkholderia_pseudomallei#increased_virulence_(hypervirulence)	No definition line	52.381
MHUMG1_26821	114	2.20656e-61	G4MUR7#PHI:4475#MoTup1#318829#Magnaporthe_oryzae#loss_of_pathogenicity	No definition line	52.381
MHUMG1_3631	201	1.60712e-59	A0A0F7A0T2#PHI:7697#BphP1#317#Pseudomonas_syringae#increased_virulence_(hypervirulence)	No definition line	52.381
MHUMG1_67481	26	3.26887e-49	P25535#PHI:7028#ubiI#562#Escherichia_coli#reduced_virulence	No definition line	52.381
MHUMG1_40181	50	3.53683e-44	I1S172#PHI:1420#GzC2H088#5518#Fusarium_graminearum#unaffected_pathogenicity	No definition line	52.381
MHUMG1_57251	103	1.92929e-39	O93800#PHI:133#AKT1#5599#Alternaria_alternata#loss_of_pathogenicity	No definition line	52.381
MHUMG1_13431	46	3.32238e-35	I1RV04#PHI:1814#GzZC129#5518#Fusarium_graminearum#lethal	No definition line	52.381
MHUMG1_17421	15	3.80475e-34	Q5A4W8#PHI:7195#Bdf1#5476#Candida_albicans#reduced_virulence	No definition line	52.381
MHUMG1_42691	244	2.94656e-33	I1RE61#PHI:1800#GzZC115#5518#Fusarium_graminearum#unaffected_pathogenicity	No definition line	52.381
MHUMG1_55691	14	5.66531e-32	I1RBU0#PHI:1632#GzWing004#5518#Fusarium_graminearum#unaffected_pathogenicity	No definition line	52.381
MHUMG1_98161	9	2.61695e-18	Q4IQT8#PHI:1618#GzFET5#5518#Fusarium_graminearum#unaffected_pathogenicity	No definition line	52.381
MHUMG1_52611	19	6.33055e-18	Q8PC98#PHI:7945#pip_(proline_iminopeptidase)#339#Xanthomonas_campestris#effector_(plant_avirulence_determinant)	No definition line	52.381
MHUMG1_79201	11	3.64426e-17	Q945T9#PHI:653#GIP2#67593#Phytophthora_sojae#effector_(plant_avirulence_determinant)	No definition line	52.381
MHUMG1_56501	20	6.01927e-15	G2XD29#PHI:2731#VdSge1#27337#Verticillium_dahliae#loss_of_pathogenicity	No definition line	52.381
MHUMG1_7651	48	1.6035e-09	G4MUR7#PHI:4475#MoTup1#318829#Magnaporthe_oryzae#loss_of_pathogenicity	No definition line	52.381
MHUMG1_99231	37	2.75944e-08	I1RUB2#PHI:719#GzFUS1#5518#Fusarium_graminearum#unaffected_pathogenicity	No definition line	52.381
MHUMG1_98521	14	1.50302e-07	I1RU55#PHI:1391#GzC2H054#5518#Fusarium_graminearum#unaffected_pathogenicity	No definition line	52.381
MHUMG1_10371	12	7.64635e-07	I1RG27#PHI:1442#GzDNL#5518#Fusarium_graminearum#unaffected_pathogenicity	No definition line	52.381
MHUMG1_71681	10	0	G4N7K5#PHI:3062#MoRga2#318829#Magnaporthe_oryzae#unaffected_pathogenicity	No definition line	52.3627
MHUMG1_81211	6	2.68419e-146	F9XHT2#PHI:7446#Myco4#1047171#Zymoseptoria_tritici#reduced_virulence	No definition line	52.3364
MHUMG1_95051	49	1.21737e-18	G2XA95#PHI:6833#Vd6LysM#27337#Verticillium_dahliae#effector_(plant_avirulence_determinant)	No definition line	52.3077
MHUMG1_52631	2	9.82356e-153	Q59P00#PHI:2558#DUR31#5476#Candida_albicans#reduced_virulence	No definition line	52.3046
MHUMG1_13601	14	0	B0YCA2#PHI:7121#tslA#746128#Aspergillus_fumigatus#increased_virulence_(hypervirulence)	No definition line	52.2727
MHUMG1_92931	15	8.71828e-10	Q4WLB9#PHI:4015#CfmA#746128#Aspergillus_fumigatus#unaffected_pathogenicity	No definition line	52.2727
MHUMG1_52901	7	6.89235e-113	I1RDZ2#PHI:5809#Fgsg01861#5518#Fusarium_graminearum#unaffected_pathogenicity	No definition line	52.2346
MHUMG1_36381	19	8.67412e-152	A0A290WI18#PHI:7706#VEDA_05196#27337#Verticillium_dahliae#reduced_virulence__unaffected_pathogenicity__increased_virulence_(hypervirulence)	No definition line	52.1912
MHUMG1_33141	232	0	I1RQG9#PHI:1378#GzC2H041#5518#Fusarium_graminearum#unaffected_pathogenicity	No definition line	52.1739
MHUMG1_68151	21	0	I1RM25#PHI:1579#GzOB019#5518#Fusarium_graminearum#unaffected_pathogenicity	No definition line	52.1739
MHUMG1_106161	72	0	Q9Y8A2#PHI:255#FUM1_(FUM5)#5127#Fusarium_fujikuroi#unaffected_pathogenicity	No definition line	52.1739
MHUMG1_79311	16	3.43634e-164	Q9C0L9#PHI:512#CaNAG6#5476#Candida_albicans#reduced_virulence	No definition line	52.1739
MHUMG1_93651	8	1.57959e-120	G4NJD1#PHI:2171#Peroxisomal_copper_amine_oxidase#318829#Magnaporthe_oryzae#reduced_virulence	No definition line	52.1739
MHUMG1_12071	10	1.34139e-79	Q4HWE2#PHI:1671#GzCCHC011#5518#Fusarium_graminearum#reduced_virulence	No definition line	52.1739
MHUMG1_96331	4	3.96673e-67	A0A059UDR8#PHI:2897#BEC1019#34373#Blumeria_graminis#reduced_virulence	No definition line	52.1739
MHUMG1_57361	10	2.37719e-65	Q5A1L6#PHI:3822#GIT3#5476#Candida_albicans#reduced_virulence	No definition line	52.1739
MHUMG1_89861	254	3.21846e-57	I1RHA1#PHI:1270#FGSG_03146#5518#Fusarium_graminearum#unaffected_pathogenicity	No definition line	52.1739
MHUMG1_43271	87	4.14615e-42	F0XP73#PHI:2693#GcABC-G1#226899#Grosmannia_clavigera#reduced_virulence	No definition line	52.1739
MHUMG1_7671	4	2.43071e-39	Q55M11#PHI:6749#UGT1#5207#Cryptococcus_neoformans#loss_of_pathogenicity	No definition line	52.1739
MHUMG1_22691	39	4.54236e-33	G7TIP9#PHI:4138#xrp14#347#Xanthomonas_oryzae#reduced_virulence	No definition line	52.1739
MHUMG1_50121	11	1.63408e-30	P0A086#PHI:4580#msrA2#1280#Staphylococcus_aureus#unaffected_pathogenicity__reduced_virulence	No definition line	52.1739
MHUMG1_29461	26	6.38982e-30	G5EHZ3#PHI:9055#MoIVD_(MGG_02540)#318829#Magnaporthe_oryzae#reduced_virulence	No definition line	52.1739
MHUMG1_97531	213	8.6977e-22	I1RM02#PHI:1955#GzZC270#5518#Fusarium_graminearum#unaffected_pathogenicity	No definition line	52.1739
MHUMG1_30841	35	1.16849e-21	B9JV05#PHI:2895#F-avi4330#373#Agrobacterium_vitis#loss_of_pathogenicity	No definition line	52.1739
MHUMG1_89741	136	5.08375e-17	I1RUC7#PHI:1260#FGSG_07816#5518#Fusarium_graminearum#unaffected_pathogenicity	No definition line	52.1739
MHUMG1_57681	26	3.91159e-10	A0A0B5J4U6#PHI:4609#BxCYP33D3#6326#Bursaphelenchus_xylophilus#reduced_virulence	No definition line	52.1739
MHUMG1_80471	16	8.90142e-08	A3M2U3#PHI:7809#adeN#470#Acinetobacter_baumannii#increased_virulence_(hypervirulence)	No definition line	52.1739
MHUMG1_19781	12	7.93879e-07	Q4WZP3#PHI:8875#gefA_(Afu2g16240)#746128#Aspergillus_fumigatus#unaffected_pathogenicity__loss_of_pathogenicity	No definition line	52.1739
MHUMG1_47291	73	3.41338e-06	B2SRG1#PHI:1141#raxB#347#Xanthomonas_oryzae#increased_virulence_(hypervirulence)	No definition line	52.1739
MHUMG1_53081	8	0	A0A0D2XJY4#PHI:4723#gnn1#5507#Fusarium_oxysporum#unaffected_pathogenicity	No definition line	52.1411
MHUMG1_20321	14	7.52669e-103	I1RSJ5#PHI:1489#GzHMG021#5518#Fusarium_graminearum#unaffected_pathogenicity	No definition line	52.1226
MHUMG1_43511	7	1.28939e-154	I1RD24#PHI:5091#FgRic8#5518#Fusarium_graminearum#reduced_virulence	No definition line	52.1158
MHUMG1_26411	5	0	Q4WQM5#PHI:7692#FlcA#746128#Aspergillus_fumigatus#loss_of_pathogenicity	No definition line	52.0918
MHUMG1_7491	6	3.75994e-99	A5H456#PHI:867__PHI:1159#MgAtr7#1047171#Zymoseptoria_tritici#unaffected_pathogenicity__chemistry_target:_sensitivity_to_chemical	No definition line	52.0635
MHUMG1_37801	296	1.48747e-164	I1RR13#PHI:1709#GzZC024#5518#Fusarium_graminearum#unaffected_pathogenicity	No definition line	52.0522
MHUMG1_60051	17	0	X5FD66#PHI:4525#PFP1#914237#Rhynchosporium_commune#reduced_virulence	No definition line	52
MHUMG1_101631	47	0	Q4WYE4#PHI:7168#crpA#746128#Aspergillus_fumigatus#reduced_virulence	No definition line	52
MHUMG1_28951	3	4.00508e-142	J9VNZ8#PHI:3528#PHO89#5207#Cryptococcus_neoformans#reduced_virulence	No definition line	52
MHUMG1_56911	99	2.6664e-124	I1S2J9#PHI:3924__PHI:8224__PHI:9036#FgABC1__Fg10995__fgm5_(FGSG_10995)#5518#Fusarium_graminearum#reduced_virulence	No definition line	52
MHUMG1_55051	147	3.64498e-78	I1S1A5#PHI:1755#GzZC070#5518#Fusarium_graminearum#unaffected_pathogenicity	No definition line	52
MHUMG1_23991	24	5.6515e-73	W7N2B4#PHI:3381#FVEG_12533#117187#Fusarium_verticillioides#unaffected_pathogenicity	No definition line	52
MHUMG1_103921	7	6.38271e-65	F6K8L7#PHI:2842#CnSFH5#5207#Cryptococcus_neoformans#unaffected_pathogenicity__reduced_virulence	No definition line	52
MHUMG1_46211	15	6.51942e-41	G4MQP9#PHI:2177#PAS1#318829#Magnaporthe_oryzae#unaffected_pathogenicity	No definition line	52
MHUMG1_62821	14	2.80484e-37	P40291#PHI:7902#yscN#633#Yersinia_pseudotuberculosis#unaffected_pathogenicity	No definition line	52
MHUMG1_80171	24	3.20229e-34	Q0UA24#PHI:2256#Xdh1#13684#Parastagonospora_nodorum#unaffected_pathogenicity	No definition line	52
MHUMG1_93571	6	4.36458e-28	C5P3X6#PHI:479#MEP1#199306#Coccidioides_posadasii#reduced_virulence	No definition line	52
MHUMG1_100191	12	7.55828e-19	Q5GFD3#PHI:413#MPD1#13684#Parastagonospora_nodorum#unaffected_pathogenicity	No definition line	52
MHUMG1_65611	20	5.77694e-18	Q01446#PHI:112#MAK1#140110#Nectria_haematococca#reduced_virulence	No definition line	52
MHUMG1_93791	13	1.04742e-15	A0ST44#PHI:1047#CTB6#29003#Cercospora_nicotianae#reduced_virulence	No definition line	52
MHUMG1_26161	5	2.7523e-12	A6QGB6#PHI:3999#FMT#1280#Staphylococcus_aureus#reduced_virulence	No definition line	52
MHUMG1_81541	8	2.63812e-11	G4Z2B4#PHI:3071#PsTatD4#67593#Phytophthora_sojae#reduced_virulence	No definition line	52
MHUMG1_82651	10	4.97101e-10	Q945T9#PHI:653#GIP2#67593#Phytophthora_sojae#effector_(plant_avirulence_determinant)	No definition line	52
MHUMG1_12401	10	1.60887e-09	G4N5E4#PHI:2060#MgLig4#318829#Magnaporthe_oryzae#unaffected_pathogenicity	No definition line	52
MHUMG1_21201	9	9.93162e-09	I1RK33#PHI:1683#GzRad001#5518#Fusarium_graminearum#lethal	No definition line	52
MHUMG1_101121	9	1.54123e-08	G4XKY9#PHI:2315#ChLae1#5016#Bipolaris_maydis#reduced_virulence__increased_virulence_(hypervirulence)	No definition line	52
MHUMG1_6541	8	5.99317e-08	G4MQZ9#PHI:2025#HDL1#318829#Magnaporthe_oryzae#unaffected_pathogenicity	No definition line	52
MHUMG1_53041	4	1.99865e-07	A0A098DK45#PHI:7123#Fgvps39#5518#Fusarium_graminearum#reduced_virulence	No definition line	52
MHUMG1_57731	6	3.25243e-06	Q945T9#PHI:653#GIP2#67593#Phytophthora_sojae#effector_(plant_avirulence_determinant)	No definition line	52
MHUMG1_85331	4	3.68483e-102	P0CS02#PHI:3489#Gmt1#5207#Cryptococcus_neoformans#loss_of_pathogenicity	No definition line	51.9878
MHUMG1_25451	9	0	I1RJY5#PHI:1576#GzOB016#5518#Fusarium_graminearum#unaffected_pathogenicity	No definition line	51.9685
MHUMG1_54431	4	2.7787e-34	Q4WEM7#PHI:2521#GUS1#746128#Aspergillus_fumigatus#lethal	No definition line	51.9231
MHUMG1_62201	4	0	D0ERY7#PHI:2202__PHI:7327#PdeH__MopdeH#318829#Magnaporthe_oryzae#reduced_virulence__loss_of_pathogenicity	No definition line	51.919
MHUMG1_72791	1	1.36622e-46	I1RNM1#PHI:1486#GzHMG018#5518#Fusarium_graminearum#unaffected_pathogenicity	No definition line	51.9182
MHUMG1_7881	46	4.64956e-119	I1RJK1#PHI:5776#Fgsg04023#5518#Fusarium_graminearum#unaffected_pathogenicity	No definition line	51.9084
MHUMG1_101471	44	1.03122e-84	J4VU52#PHI:7380#Blys7#176275#Beauveria_bassiana#unaffected_pathogenicity	No definition line	51.8868
MHUMG1_99411	97	0	Q0TX07#PHI:4776#SnPKS19#13684#Parastagonospora_nodorum#unaffected_pathogenicity	No definition line	51.8519
MHUMG1_13861	190	3.63669e-129	I1S1P9#PHI:1787#GzZC102#5518#Fusarium_graminearum#unaffected_pathogenicity	No definition line	51.8519
MHUMG1_44461	8	7.37972e-118	B8NKR0#PHI:7316#dot1#5059#Aspergillus_flavus#reduced_virulence	No definition line	51.8519
MHUMG1_97851	71	5.04785e-77	I1S2J9#PHI:3924__PHI:8224__PHI:9036#FgABC1__Fg10995__fgm5_(FGSG_10995)#5518#Fusarium_graminearum#reduced_virulence	No definition line	51.8519
MHUMG1_41441	10	2.62108e-73	Q9P4U9#PHI:2832#AKT3-1#5599#Alternaria_alternata#loss_of_pathogenicity	No definition line	51.8519
MHUMG1_57501	20	1.90604e-59	W7N2B4#PHI:3381#FVEG_12533#117187#Fusarium_verticillioides#unaffected_pathogenicity	No definition line	51.8519
MHUMG1_58331	12	9.16607e-47	Q9I5F6#PHI:7999#putA#287#Pseudomonas_aeruginosa#reduced_virulence	No definition line	51.8519
MHUMG1_81821	179	9.18492e-36	I1S7J0#PHI:1819#GzZC134#5518#Fusarium_graminearum#unaffected_pathogenicity	No definition line	51.8519
MHUMG1_11471	33	6.39291e-31	Q6FVH7#PHI:7930#Cgyps6#5478#Candida_glabrata#reduced_virulence__unaffected_pathogenicity	No definition line	51.8519
MHUMG1_63231	223	8.62012e-23	I1S914#PHI:1721#GzZC036#5518#Fusarium_graminearum#unaffected_pathogenicity	No definition line	51.8519
MHUMG1_21371	17	3.69639e-18	G2XD68#PHI:8858#VdSSEP1_(VDAG-08100)#27337#Verticillium_dahliae#reduced_virulence	No definition line	51.8519
MHUMG1_46471	90	9.81934e-14	I1RD74#PHI:1961#GzZC276#5518#Fusarium_graminearum#unaffected_pathogenicity	No definition line	51.8519
MHUMG1_45531	7	5.44362e-11	N1JK93#PHI:2901#BEC1040#34373#Blumeria_graminis#reduced_virulence	No definition line	51.8519
MHUMG1_71831	7	1.56602e-100	A7ESB3#PHI:3329#Ss-oah1#5180#Sclerotinia_sclerotiorum#reduced_virulence	No definition line	51.8272
MHUMG1_24671	4	5.32764e-155	G4YQK3#PHI:6261#PsAAT3#67593#Phytophthora_sojae#reduced_virulence	No definition line	51.7815
MHUMG1_101591	114	8.29279e-60	A0A0D2YG10#PHI:6936#fub1#5507#Fusarium_oxysporum#reduced_virulence	No definition line	51.7647
MHUMG1_5001	6	8.19812e-134	P40086#PHI:503#COX15#4932#Saccharomyces_cerevisiae#reduced_virulence	No definition line	51.7413
MHUMG1_16031	11	3.32251e-69	A0A0F6AZ26#PHI:7212#STM14_1003#28901#Salmonella_enterica#reduced_virulence	No definition line	51.7375
MHUMG1_59551	10	0	G4N3K2#PHI:882#MGG_04985#318829#Magnaporthe_oryzae#reduced_virulence	No definition line	51.735
MHUMG1_46181	6	9.11677e-177	I1RDG6#PHI:1555#GzMyb019#5518#Fusarium_graminearum#unaffected_pathogenicity	No definition line	51.7241
MHUMG1_99081	134	7.7706e-147	Q8XQ67#PHI:7323#ralA#305#Ralstonia_solanacearum#loss_of_pathogenicity	No definition line	51.7241
MHUMG1_56791	9	9.0283e-147	G4MRB0#PHI:815#MGG_04685#318829#Magnaporthe_oryzae#reduced_virulence	No definition line	51.7241
MHUMG1_37761	7	3.9505e-95	Q51Y68#PHI:2083#Moatg17#318829#Magnaporthe_oryzae#loss_of_pathogenicity	No definition line	51.7241
MHUMG1_98541	39	1.89614e-69	Q6WP49#PHI:438#BcBOT1_(CND5)#40559#Botrytis_cinerea#reduced_virulence	No definition line	51.7241
MHUMG1_28141	3	5.55187e-35	Q6WER3#PHI:432__PHI:4212__PHI:4242#FGL1__Fgl1#5518#Fusarium_graminearum#reduced_virulence	No definition line	51.7241
MHUMG1_102531	10	6.75046e-33	Q5XTQ4#PHI:541#LIP1#40559#Botrytis_cinerea#unaffected_pathogenicity	No definition line	51.7241
MHUMG1_39401	8	3.26075e-23	I1REJ1#PHI:1662#GzCCHC002#5518#Fusarium_graminearum#unaffected_pathogenicity	No definition line	51.7241
MHUMG1_103361	195	4.35063e-20	I1RHA1#PHI:1270#FGSG_03146#5518#Fusarium_graminearum#unaffected_pathogenicity	No definition line	51.7241
MHUMG1_49741	16	5.26431e-13	P95830#PHI:6986#DnaJ#1313#Streptococcus_pneumoniae#reduced_virulence	No definition line	51.7241
MHUMG1_65091	20	5.51166e-08	Q8Y8N0#PHI:6510__PHI:7620#CshA__Lmo0866#1639#Listeria_monocytogenes#unaffected_pathogenicity__increased_virulence_(hypervirulence)	No definition line	51.7241
MHUMG1_103461	31	8.70179e-08	I1RHI8#PHI:6121#FGSG_03243#5518#Fusarium_graminearum#reduced_virulence	No definition line	51.7241
MHUMG1_20511	7	7.29606e-06	Q8PC98#PHI:7945#pip_(proline_iminopeptidase)#339#Xanthomonas_campestris#effector_(plant_avirulence_determinant)	No definition line	51.7241
MHUMG1_3621	112	0	G4NDE1#PHI:1017__PHI:2067#ABC4#318829#Magnaporthe_oryzae#reduced_virulence__loss_of_pathogenicity	No definition line	51.6423
MHUMG1_13391	12	1.6252e-70	I1S0N5#PHI:1552#GzMyb016#5518#Fusarium_graminearum#unaffected_pathogenicity	No definition line	51.6129
MHUMG1_11781	30	3.3926e-64	C6ZRH8#PHI:2976#CgOPT1#474922#Colletotrichum_gloeosporioides#reduced_virulence	No definition line	51.6129
MHUMG1_76891	6	6.47799e-33	Q4U4T0#PHI:2388#Chi2#5530#Metarhizium_anisopliae#increased_virulence_(hypervirulence)__reduced_virulence	No definition line	51.6129
MHUMG1_50961	22	8.16078e-24	A4QTE3#PHI:8927#MoSCAD1_(MGG_05096)#318829#Magnaporthe_oryzae#reduced_virulence__loss_of_pathogenicity	No definition line	51.6129
MHUMG1_98061	49	1.21385e-22	I1RI51#PHI:5792#Fgsg03476#5518#Fusarium_graminearum#unaffected_pathogenicity	No definition line	51.6129
MHUMG1_16271	20	3.32651e-14	P25535#PHI:7028#ubiI#562#Escherichia_coli#reduced_virulence	No definition line	51.6129
MHUMG1_102461	44	5.6155e-06	I1S2M5#PHI:2909#Cyp51C#5518#Fusarium_graminearum#reduced_virulence__unaffected_pathogenicity	No definition line	51.6129
MHUMG1_69331	6	1.89743e-162	W7MS01#PHI:3389#FVEG_12521#117187#Fusarium_verticillioides#unaffected_pathogenicity	No definition line	51.5789
MHUMG1_66061	47	0	J4KMX0#PHI:7152#pmcB#176275#Beauveria_bassiana#reduced_virulence	No definition line	51.5695
MHUMG1_98951	5	3.85051e-51	A0A0A2ILW0#PHI:7664#LysM1#27334#Penicillium_expansum#effector_(plant_avirulence_determinant)	No definition line	51.5625
MHUMG1_44551	4	0	G4N5N0#PHI:5441#ABA_GPCR#318829#Magnaporthe_oryzae#unaffected_pathogenicity	No definition line	51.5517
MHUMG1_48401	4	1.97607e-109	G4MS40#PHI:811#MGG_10510#318829#Magnaporthe_oryzae#reduced_virulence	No definition line	51.5152
MHUMG1_68831	99	1.46162e-39	Q3Y5V5#PHI:1018__PHI:2042#ABC3#318829#Magnaporthe_oryzae#loss_of_pathogenicity	No definition line	51.5152
MHUMG1_89451	11	4.72359e-30	Q9P304#PHI:199#AOX1#5499#Passalora_fulva#reduced_virulence	No definition line	51.5152
MHUMG1_27051	101	4.79192e-14	G4MSX7#PHI:772__PHI:797#MGG_01481#318829#Magnaporthe_oryzae#loss_of_pathogenicity__reduced_virulence	No definition line	51.5152
MHUMG1_47891	9	7.33209e-12	Q87W07#PHI:7337#HopI1#318829#Magnaporthe_oryzae#effector_(plant_avirulence_determinant)	No definition line	51.5152
MHUMG1_33191	25	1.30347e-11	Q5H5U8#PHI:7753#AnkB_(XOO0418)#347#Xanthomonas_oryzae#reduced_virulence	No definition line	51.5152
MHUMG1_101581	19	5.46648e-08	I1RKU6#PHI:1455#GzAra003#5518#Fusarium_graminearum#unaffected_pathogenicity	No definition line	51.5152
MHUMG1_81381	3	4.89356e-07	I1RAW2#PHI:1345#GzC2H005#5518#Fusarium_graminearum#unaffected_pathogenicity	No definition line	51.5152
MHUMG1_58541	9	1.21745e-138	T2C913#PHI:3225#Ndo1#36651#Penicillium_digitatum#unaffected_pathogenicity	No definition line	51.4368
MHUMG1_25651	12	2.3495e-14	J4USC3#PHI:6471#Trr2#176275#Beauveria_bassiana#reduced_virulence	No definition line	51.4286
MHUMG1_93701	10	4.67208e-133	E9R863#PHI:5267#UgeB#162425#Aspergillus_nidulans#increased_virulence_(hypervirulence)	No definition line	51.3441
MHUMG1_88161	5	0	O93841#PHI:243#CHIP6#474922#Colletotrichum_gloeosporioides#reduced_virulence	No definition line	51.3359
MHUMG1_17651	5	1.93591e-75	Q6TDT0#PHI:420#SOD2#552467#Cryptococcus_gattii_vgiii#loss_of_pathogenicity	No definition line	51.3158
MHUMG1_94721	89	0	F9XQ63#PHI:8597#ZtPks8#1047171#Zymoseptoria_tritici#unaffected_pathogenicity	No definition line	51.3089
MHUMG1_52471	24	3.62171e-175	Q9P8L8#PHI:544#BCMFS1#40559#Botrytis_cinerea#unaffected_pathogenicity	No definition line	51.2974
MHUMG1_44281	310	1.46982e-73	I1RYY1#PHI:1757#GzZC072#5518#Fusarium_graminearum#unaffected_pathogenicity	No definition line	51.2821
MHUMG1_44721	9	6.04598e-71	I1RK21#PHI:1559#GzNEG001#5518#Fusarium_graminearum#unaffected_pathogenicity	No definition line	51.2821
MHUMG1_105741	302	5.91679e-32	I1RH93#PHI:1924#GzZC239#5518#Fusarium_graminearum#unaffected_pathogenicity	No definition line	51.2821
MHUMG1_87421	38	3.29596e-11	B9JV05#PHI:2895#F-avi4330#373#Agrobacterium_vitis#loss_of_pathogenicity	No definition line	51.2821
MHUMG1_98391	33	1.36227e-10	A0A0J9WX00#PHI:6957#gigX5#347#Xanthomonas_oryzae#increased_virulence_(hypervirulence)	No definition line	51.2821
MHUMG1_90511	48	0	J4KMX0#PHI:7152#pmcB#176275#Beauveria_bassiana#reduced_virulence	No definition line	51.2658
MHUMG1_93041	4	4.7123e-77	A5H456#PHI:867__PHI:1159#MgAtr7#1047171#Zymoseptoria_tritici#unaffected_pathogenicity__chemistry_target:_sensitivity_to_chemical	No definition line	51.2456
MHUMG1_44451	3	6.94758e-45	Q520U5#PHI:2082#Moatg16#318829#Magnaporthe_oryzae#loss_of_pathogenicity	No definition line	51.2438
MHUMG1_88781	125	0	Q92217#PHI:55#PKS1#5016#Bipolaris_maydis#reduced_virulence	No definition line	51.087
MHUMG1_3991	51	0	Q4WYE4#PHI:7168#crpA#746128#Aspergillus_fumigatus#reduced_virulence	No definition line	51.0638
MHUMG1_3241	10	1.25653e-104	J9VJS8#PHI:3098#URA4#5207#Cryptococcus_neoformans#reduced_virulence	No definition line	51.0448
MHUMG1_50741	13	2.94325e-101	I1RW42#PHI:5783#Fgsg08496#5518#Fusarium_graminearum#unaffected_pathogenicity	No definition line	51.0448
MHUMG1_31281	6	1.48243e-58	Q6TDT0#PHI:420#SOD2#552467#Cryptococcus_gattii_vgiii#loss_of_pathogenicity	No definition line	51.0309
MHUMG1_55651	6	1.01609e-55	B2SI02#PHI:1139#raxQ#347#Xanthomonas_oryzae#increased_virulence_(hypervirulence)	No definition line	51.0204
MHUMG1_9811	6	2.91409e-58	J9VNZ8#PHI:3528#PHO89#5207#Cryptococcus_neoformans#reduced_virulence	No definition line	50.9804
MHUMG1_30501	60	9.69435e-73	I1RM58#PHI:5851#Fgsg05039#5518#Fusarium_graminearum#unaffected_pathogenicity	No definition line	50.9615
MHUMG1_105501	82	1.4937e-28	I1RUC7#PHI:1260#FGSG_07816#5518#Fusarium_graminearum#unaffected_pathogenicity	No definition line	50.9091
MHUMG1_70471	22	0	G4MZ98#PHI:5186#MoAPX2#318829#Magnaporthe_oryzae#reduced_virulence	No definition line	50.8974
MHUMG1_15521	14	6.65267e-169	Q6FM61#PHI:2570#CYB2#5478#Candida_glabrata#reduced_virulence	No definition line	50.8621
MHUMG1_64751	49	0	I1RAQ0#PHI:1344#GzC2H004#5518#Fusarium_graminearum#unaffected_pathogenicity	No definition line	50.846
MHUMG1_5111	4	2.78547e-54	Q4WPS9#PHI:7457#RamA#746128#Aspergillus_fumigatus#reduced_virulence	No definition line	50.8197
MHUMG1_81341	72	9.05755e-33	I1RUC7#PHI:1260#FGSG_07816#5518#Fusarium_graminearum#unaffected_pathogenicity	No definition line	50.8197
MHUMG1_13171	50	5.64534e-84	Q9P872#PHI:440#PMR1#5476#Candida_albicans#reduced_virulence	No definition line	50.7937
MHUMG1_68991	2	1.1187e-80	Q5AAI8#PHI:4045#Nap1#5476#Candida_albicans#reduced_virulence	No definition line	50.7692
MHUMG1_35501	21	0	I1RF62#PHI:712__PHI:3991#GIP1__Gip1#5518#Fusarium_graminearum#unaffected_pathogenicity	No definition line	50.7589
MHUMG1_16851	7	3.0269e-42	G4MTK9#PHI:4885#MoYpd1p#318829#Magnaporthe_oryzae#loss_of_pathogenicity	No definition line	50.7576
MHUMG1_36551	43	1.69213e-93	G4MS58#PHI:881#MGG_04556#318829#Magnaporthe_oryzae#reduced_virulence	No definition line	50.7375
MHUMG1_4951	9	1.85222e-15	J4UPL6#PHI:5394#mas5#176275#Beauveria_bassiana#loss_of_pathogenicity	No definition line	50.7246
MHUMG1_34261	10	2.23596e-106	I1RUP7#PHI:1493#GzHMG025#5518#Fusarium_graminearum#unaffected_pathogenicity	No definition line	50.7205
MHUMG1_34081	3	2.58152e-83	B6VCT6#PHI:2182#MoAtg4#318829#Magnaporthe_oryzae#loss_of_pathogenicity	No definition line	50.7042
MHUMG1_39481	20	9.72005e-171	G4MPA8#PHI:890#MGG_07015#318829#Magnaporthe_oryzae#reduced_virulence	No definition line	50.7014
MHUMG1_57591	13	9.01058e-152	G4N740#PHI:4024#MoST1#318829#Magnaporthe_oryzae#unaffected_pathogenicity	No definition line	50.6903
MHUMG1_34921	4	1.73242e-138	F9XJV5#PHI:2441#MgAlg2#1047171#Zymoseptoria_tritici#loss_of_pathogenicity	No definition line	50.6818
MHUMG1_18291	2	7.83944e-113	I1S1B7#PHI:1422#GzC2H090#5518#Fusarium_graminearum#reduced_virulence	No definition line	50.6383
MHUMG1_81411	5	1.42737e-22	G4MRI4#PHI:810#MGG_02436#318829#Magnaporthe_oryzae#reduced_virulence	No definition line	50.6329
MHUMG1_91871	2	3.86803e-67	Q6WER3#PHI:432__PHI:4212__PHI:4242#FGL1__Fgl1#5518#Fusarium_graminearum#reduced_virulence	No definition line	50.5747
MHUMG1_47641	5	2.89861e-142	G4YQK3#PHI:6261#PsAAT3#67593#Phytophthora_sojae#reduced_virulence	No definition line	50.4975
MHUMG1_38011	33	5.6246e-153	I1RRI0#PHI:1381#GzC2H044#5518#Fusarium_graminearum#unaffected_pathogenicity	No definition line	50.4554
MHUMG1_2691	4	1.61049e-136	Q9X4G0#PHI:5042#hmgA#287#Pseudomonas_aeruginosa#increased_virulence_(hypervirulence)__reduced_virulence	No definition line	50.4525
MHUMG1_88181	61	0	P43098#PHI:96#FAS2#5476#Candida_albicans#loss_of_pathogenicity	No definition line	50.3663
MHUMG1_4961	7	4.3718e-80	I1RWS6#PHI:1593#GzOB033#5518#Fusarium_graminearum#unaffected_pathogenicity	No definition line	50.3571
MHUMG1_21211	8	5.37467e-42	P9WJS3#PHI:7746#rv3109#1773#Mycobacterium_tuberculosis#reduced_virulence__unaffected_pathogenicity	No definition line	50.3226
MHUMG1_84481	20	1.08987e-120	Q8NJQ2#PHI:2839#RED1#5016#Bipolaris_maydis#reduced_virulence	No definition line	50.289
MHUMG1_23871	4	4.86783e-117	A0A1D8PKX3#PHI:8905#VMA6#5476#Candida_albicans#reduced_virulence	No definition line	50.2825
MHUMG1_45901	6	2.37391e-137	I1RMP5#PHI:5806#Fgsg05239#5518#Fusarium_graminearum#unaffected_pathogenicity	No definition line	50.2165
MHUMG1_74851	5	1.03902e-59	Q4WKJ9#PHI:2546#BRX1#746128#Aspergillus_fumigatus#lethal	No definition line	50.2165
MHUMG1_25621	14	9.7141e-119	G4MWP4#PHI:5624#FZC30#318829#Magnaporthe_oryzae#unaffected_pathogenicity	No definition line	50.1873
MHUMG1_83971	23	1.16417e-98	G4MS58#PHI:881#MGG_04556#318829#Magnaporthe_oryzae#reduced_virulence	No definition line	50.1484
MHUMG1_46111	8	1.19122e-121	Q00049#PHI:7768#NorA_(AflE)#5059#Aspergillus_flavus#reduced_virulence	No definition line	50.1312
MHUMG1_65831	10	2.65959e-117	Q5A679#PHI:4906#Gyp1#5476#Candida_albicans#reduced_virulence	No definition line	50.1279
MHUMG1_32271	5	0	G4N983#PHI:2215#BIM1#318829#Magnaporthe_oryzae#reduced_virulence	No definition line	50.1184
MHUMG1_64761	8	0	Q4WHA4#PHI:7694#FlcC#746128#Aspergillus_fumigatus#loss_of_pathogenicity	No definition line	50.0732
MHUMG1_30341	104	0	G4NDE1#PHI:1017__PHI:2067#ABC4#318829#Magnaporthe_oryzae#reduced_virulence__loss_of_pathogenicity	No definition line	50
MHUMG1_46801	5	0	G4NIP2#PHI:783__PHI:2068#MGG_04163__DES1#318829#Magnaporthe_oryzae#reduced_virulence	No definition line	50
MHUMG1_88151	553	0	Q01886#PHI:12#HTS1#5017#Bipolaris_zeicola#loss_of_pathogenicity	No definition line	50
MHUMG1_90391	215	0	Q9C1Q7#PHI:253#FOS1#746128#Aspergillus_fumigatus#reduced_virulence	No definition line	50
MHUMG1_93631	299	0	I1RQU8#PHI:1714#GzZC029#5518#Fusarium_graminearum#lethal	No definition line	50
MHUMG1_54051	14	2.28275e-172	Q5ADN1#PHI:6074#Tpd3#5476#Candida_albicans#reduced_virulence	No definition line	50
MHUMG1_93951	152	5.85272e-166	I1RMZ4#PHI:1938#GzZC253#5518#Fusarium_graminearum#unaffected_pathogenicity	No definition line	50
MHUMG1_29801	75	6.63368e-140	Q4Q4W3#PHI:5554#LmABCB3#5664#Leishmania_major#reduced_virulence	No definition line	50
MHUMG1_41461	11	5.90877e-129	Q59X38#PHI:2823#PES1#5476#Candida_albicans#reduced_virulence	No definition line	50
MHUMG1_85731	246	6.78286e-125	A0A024CHY4#PHI:4837#cipA#36746#Pseudomonas_cichorii#reduced_virulence	No definition line	50
MHUMG1_86381	159	6.64949e-124	I1RUX5#PHI:1804#GzZC119#5518#Fusarium_graminearum#unaffected_pathogenicity	No definition line	50
MHUMG1_19911	7	2.14937e-119	Q5K6X5#PHI:6297#CDC50#5207#Cryptococcus_neoformans#reduced_virulence	No definition line	50
MHUMG1_93391	17	1.93259e-114	Q6FM61#PHI:2570#CYB2#5478#Candida_glabrata#reduced_virulence	No definition line	50
MHUMG1_6801	8	7.36019e-113	Q1KSF2#PHI:3102#BCKDH#5811#Toxoplasma_gondii#reduced_virulence	No definition line	50
MHUMG1_74951	8	5.30716e-112	P32964#PHI:143#CHT#5563#Gloeocercospora_sorghi#unaffected_pathogenicity	No definition line	50
MHUMG1_4761	4	4.78321e-93	I1RWS0#PHI:1592#GzOB032#5518#Fusarium_graminearum#unaffected_pathogenicity	No definition line	50
MHUMG1_61111	44	3.32118e-90	G4NGP6#PHI:2097#Neo1#318829#Magnaporthe_oryzae#loss_of_pathogenicity	No definition line	50
MHUMG1_8551	10	2.53954e-88	I1RAH2#PHI:1629#GzWing001#5518#Fusarium_graminearum#unaffected_pathogenicity	No definition line	50
MHUMG1_30701	68	3.29437e-86	I1RYB0#PHI:5826#GIV4#5518#Fusarium_graminearum#reduced_virulence	No definition line	50
MHUMG1_21071	6	5.00954e-82	C0NFK7#PHI:6265#Eng1#5037#Histoplasma_capsulatum#reduced_virulence	No definition line	50
MHUMG1_3281	274	1.49905e-79	A0A0F6AZ27#PHI:7214#STM14_1005#28901#Salmonella_enterica#reduced_virulence	No definition line	50
MHUMG1_13501	14	3.02961e-79	I1RIL9#PHI:8803#FgShyC_(FGSG_03657)#5518#Fusarium_graminearum#unaffected_pathogenicity	No definition line	50
MHUMG1_93911	33	1.41197e-76	P28873#PHI:26#CaMDR1#5476#Candida_albicans#reduced_virulence	No definition line	50
MHUMG1_49691	12	1.2581e-74	G4N402#PHI:2107#MGG_05905.5#318829#Magnaporthe_oryzae#unaffected_pathogenicity__reduced_virulence	No definition line	50
MHUMG1_101561	84	4.49494e-73	D2E9X0#PHI:2379#DEP5#29001#Alternaria_brassicicola#reduced_virulence__unaffected_pathogenicity	No definition line	50
MHUMG1_33461	23	7.6015e-70	W7N2B4#PHI:3381#FVEG_12533#117187#Fusarium_verticillioides#unaffected_pathogenicity	No definition line	50
MHUMG1_1181	9	2.05968e-67	Q0V515#PHI:3914#Sdh1#13684#Parastagonospora_nodorum#reduced_virulence	No definition line	50
MHUMG1_36621	8	3.1132e-67	I1RJ45#PHI:6120#FGSG_03846#5518#Fusarium_graminearum#reduced_virulence	No definition line	50
MHUMG1_90521	14	1.25168e-65	Q59QB4#PHI:8867#vcx1#5476#Candida_albicans#unaffected_pathogenicity	No definition line	50
MHUMG1_551	108	2.77208e-65	Q3Y5V5#PHI:1018__PHI:2042#ABC3#318829#Magnaporthe_oryzae#loss_of_pathogenicity	No definition line	50
MHUMG1_66251	17	1.3188e-62	D2E9W9#PHI:2378#DEP4#29001#Alternaria_brassicicola#reduced_virulence__unaffected_pathogenicity	No definition line	50
MHUMG1_83831	4	5.45657e-59	A9QUB2#PHI:2403#CSN1#169388#Fusarium_solani#increased_virulence_(hypervirulence)__reduced_virulence	No definition line	50
MHUMG1_91971	16	5.54235e-58	A0ST41#PHI:1049#CTB2#29003#Cercospora_nicotianae#reduced_virulence	No definition line	50
MHUMG1_29121	21	2.14337e-54	G4N740#PHI:4024#MoST1#318829#Magnaporthe_oryzae#unaffected_pathogenicity	No definition line	50
MHUMG1_92241	15	3.27642e-48	I1S2J3#PHI:9041#fgm9_(FGSG_10989)#5518#Fusarium_graminearum#reduced_virulence	No definition line	50
MHUMG1_5321	56	6.43776e-48	I1R9B9#PHI:1998#GzZC313#5518#Fusarium_graminearum#unaffected_pathogenicity	No definition line	50
MHUMG1_103021	11	8.6776e-46	B9XXL6#PHI:8011#rhpa#210#Helicobacter_pylori#reduced_virulence	No definition line	50
MHUMG1_58641	256	1.4417e-44	I1RGD6#PHI:1193#(Sc_Sky1)#5518#Fusarium_graminearum#reduced_virulence	No definition line	50
MHUMG1_74401	10	9.18361e-43	Q5XTQ4#PHI:541#LIP1#40559#Botrytis_cinerea#unaffected_pathogenicity	No definition line	50
MHUMG1_82771	317	1.77114e-42	I1RFK9#PHI:1269#FGSG_02488#5518#Fusarium_graminearum#unaffected_pathogenicity	No definition line	50
MHUMG1_26101	19	2.95109e-42	A0A0A2KRU1#PHI:6881#laeA#27334#Penicillium_expansum#reduced_virulence	No definition line	50
MHUMG1_53901	10	5.90018e-42	G4XKY9#PHI:2315#ChLae1#5016#Bipolaris_maydis#reduced_virulence__increased_virulence_(hypervirulence)	No definition line	50
MHUMG1_79061	31	1.6702e-39	L2G011#PHI:3973#ASP#474922#Colletotrichum_gloeosporioides#reduced_virulence	No definition line	50
MHUMG1_56551	199	7.16316e-39	I1R9J1#PHI:1271#FGSG_00132#5518#Fusarium_graminearum#unaffected_pathogenicity	No definition line	50
MHUMG1_33231	11	5.62778e-38	P87199#PHI:465#KIN2#5270#Ustilago_maydis#reduced_virulence	No definition line	50
MHUMG1_34601	8	6.96233e-38	P95200#PHI:3629#Rv0392c#1773#Mycobacterium_tuberculosis#unaffected_pathogenicity	No definition line	50
MHUMG1_30111	5	8.62776e-36	Q00523#PHI:455#CAP59#5207#Cryptococcus_neoformans#loss_of_pathogenicity__reduced_virulence	No definition line	50
MHUMG1_52161	15	1.07613e-35	I1RX03#PHI:3985#FGSG_08844_(Sc_gpi7)#5518#Fusarium_graminearum#unaffected_pathogenicity	No definition line	50
MHUMG1_23171	9	2.4393e-35	Q4UWM4#PHI:3965#XC_1481#339#Xanthomonas_campestris#reduced_virulence	No definition line	50
MHUMG1_50251	46	4.73806e-35	G1X666#PHI:8036#AoRab-2_(AOL_s00054g360)#13349#Arthrobotrys_oligospora#unaffected_pathogenicity	No definition line	50
MHUMG1_30551	15	5.11762e-35	G4N0R9#PHI:5656#FZC58#318829#Magnaporthe_oryzae#unaffected_pathogenicity	No definition line	50
MHUMG1_15191	5	6.43921e-35	Q4IQT8#PHI:1618#GzFET5#5518#Fusarium_graminearum#unaffected_pathogenicity	No definition line	50
MHUMG1_70141	26	2.50491e-32	Q4WBL9#PHI:4672#AmcA#746128#Aspergillus_fumigatus#unaffected_pathogenicity	No definition line	50
MHUMG1_52091	22	4.75385e-31	C3JXE8#PHI:2835#RED2#5016#Bipolaris_maydis#reduced_virulence	No definition line	50
MHUMG1_88881	79	1.37559e-30	I1RI73#PHI:1284#FGSG_03499#5518#Fusarium_graminearum#unaffected_pathogenicity	No definition line	50
MHUMG1_98411	64	1.58703e-30	A0A098DG53#PHI:5847#Fgsg16316#5518#Fusarium_graminearum#unaffected_pathogenicity	No definition line	50
MHUMG1_14731	8	1.73394e-30	Q4UYZ7#PHI:3963#XC_0646#339#Xanthomonas_campestris#reduced_virulence	No definition line	50
MHUMG1_6021	3	6.62021e-30	M4Q9U3#PHI:3670#VdATG12#27337#Verticillium_dahliae#unaffected_pathogenicity	No definition line	50
MHUMG1_25781	37	6.62878e-30	Q32WF7#PHI:2269#Mdh1#13684#Parastagonospora_nodorum#unaffected_pathogenicity	No definition line	50
MHUMG1_58801	52	5.2367e-29	I1RUC7#PHI:1260#FGSG_07816#5518#Fusarium_graminearum#unaffected_pathogenicity	No definition line	50
MHUMG1_76681	56	5.82395e-29	I1RLA6#PHI:5841#GIV1#5518#Fusarium_graminearum#reduced_virulence	No definition line	50
MHUMG1_96361	7	5.86031e-29	Q4UWM4#PHI:3965#XC_1481#339#Xanthomonas_campestris#reduced_virulence	No definition line	50
MHUMG1_5591	16	1.3749e-27	I1S134#PHI:1767#GzZC082#5518#Fusarium_graminearum#unaffected_pathogenicity	No definition line	50
MHUMG1_21541	25	3.27321e-27	Q8Y0J2#PHI:5271#fabG1#305#Ralstonia_solanacearum#lethal	No definition line	50
MHUMG1_50541	6	6.58523e-27	I1RDG6#PHI:1555#GzMyb019#5518#Fusarium_graminearum#unaffected_pathogenicity	No definition line	50
MHUMG1_70211	6	2.64993e-26	A0A095C2M1#PHI:4556#Ure4#552467#Cryptococcus_gattii_vgiii#reduced_virulence	No definition line	50
MHUMG1_13011	14	3.85202e-25	Q4WK03#PHI:2544#PAB1#746128#Aspergillus_fumigatus#lethal	No definition line	50
MHUMG1_49661	10	5.3552e-24	B1GVX4#PHI:2289#BcBOA2#40559#Botrytis_cinerea#reduced_virulence	No definition line	50
MHUMG1_101741	45	6.07334e-24	I1SAJ8#PHI:9045#FGSG_13879#5518#Fusarium_graminearum#unaffected_pathogenicity	No definition line	50
MHUMG1_33221	11	3.41038e-23	G4NIB5#PHI:812#MGG_10702#318829#Magnaporthe_oryzae#reduced_virulence	No definition line	50
MHUMG1_84271	43	1.04111e-22	E2EAF6#PHI:2357#CYP52X1#176275#Beauveria_bassiana#reduced_virulence	No definition line	50
MHUMG1_77141	3	1.35105e-22	G5EH72#PHI:5233#MoARG5_6#318829#Magnaporthe_oryzae#loss_of_pathogenicity	No definition line	50
MHUMG1_83561	219	7.9001e-22	I1RFK9#PHI:1269#FGSG_02488#5518#Fusarium_graminearum#unaffected_pathogenicity	No definition line	50
MHUMG1_49291	13	6.19534e-21	Q4WBL9#PHI:4672#AmcA#746128#Aspergillus_fumigatus#unaffected_pathogenicity	No definition line	50
MHUMG1_94281	89	7.02062e-21	I1RUC7#PHI:1260#FGSG_07816#5518#Fusarium_graminearum#unaffected_pathogenicity	No definition line	50
MHUMG1_49791	13	7.14631e-21	G4NIB5#PHI:812#MGG_10702#318829#Magnaporthe_oryzae#reduced_virulence	No definition line	50
MHUMG1_28611	16	9.04988e-21	I1REI8#PHI:1093#FGSG_02077#5518#Fusarium_graminearum#reduced_virulence	No definition line	50
MHUMG1_54751	11	1.60171e-20	Q5ABG1#PHI:2825#SET1#5476#Candida_albicans#reduced_virulence	No definition line	50
MHUMG1_88241	6	3.64417e-20	Q2I0M6#PHI:1051#CTB3#29003#Cercospora_nicotianae#reduced_virulence	No definition line	50
MHUMG1_57391	89	7.74474e-20	G4MUR7#PHI:4475#MoTup1#318829#Magnaporthe_oryzae#loss_of_pathogenicity	No definition line	50
MHUMG1_19551	92	8.69551e-20	C4YFX2#PHI:211__PHI:6806#CaTUP1__tup1#5476#Candida_albicans#reduced_virulence	No definition line	50
MHUMG1_49191	7	2.658e-19	G4MVC5#PHI:6927#MoRAD6#318829#Magnaporthe_oryzae#reduced_virulence	No definition line	50
MHUMG1_48691	10	5.37552e-19	Q59RR7#PHI:8972#Caglk4#5476#Candida_albicans#reduced_virulence__unaffected_pathogenicity	No definition line	50
MHUMG1_27441	50	8.00149e-19	Q99UN8#PHI:7916#fabD#1280#Staphylococcus_aureus#reduced_virulence	No definition line	50
MHUMG1_105931	12	2.17073e-18	P87199#PHI:465#KIN2#5270#Ustilago_maydis#reduced_virulence	No definition line	50
MHUMG1_94531	16	2.30203e-18	I1R9P8#PHI:5797#Fgsg00201#5518#Fusarium_graminearum#unaffected_pathogenicity	No definition line	50
MHUMG1_99171	7	2.39364e-18	P87199#PHI:465#KIN2#5270#Ustilago_maydis#reduced_virulence	No definition line	50
MHUMG1_4751	3	3.5224e-18	O93801#PHI:134#AKT2#5599#Alternaria_alternata#loss_of_pathogenicity	No definition line	50
MHUMG1_22031	29	4.18555e-18	A0A290WFC9#PHI:7708#VEDA_05198#27337#Verticillium_dahliae#reduced_virulence__unaffected_pathogenicity__increased_virulence_(hypervirulence)	No definition line	50
MHUMG1_34371	107	7.1301e-18	C4YFX2#PHI:211__PHI:6806#CaTUP1__tup1#5476#Candida_albicans#reduced_virulence	No definition line	50
MHUMG1_58721	251	1.18704e-17	I1RLH1#PHI:1209#FGSG_04770#5518#Fusarium_graminearum#reduced_virulence	No definition line	50
MHUMG1_85541	13	2.12861e-17	A0ST44#PHI:1047#CTB6#29003#Cercospora_nicotianae#reduced_virulence	No definition line	50
MHUMG1_57881	6	5.54693e-17	P32964#PHI:143#CHT#5563#Gloeocercospora_sorghi#unaffected_pathogenicity	No definition line	50
MHUMG1_20981	22	6.85172e-17	W7N2B4#PHI:3381#FVEG_12533#117187#Fusarium_verticillioides#unaffected_pathogenicity	No definition line	50
MHUMG1_69471	19	1.03166e-16	I1S0N5#PHI:1552#GzMyb016#5518#Fusarium_graminearum#unaffected_pathogenicity	No definition line	50
MHUMG1_105301	9	3.15245e-15	G8BJ74#PHI:6075#och1#5480#Candida_parapsilosis#reduced_virulence	No definition line	50
MHUMG1_86631	19	1.147e-14	A0A290WFC9#PHI:7708#VEDA_05198#27337#Verticillium_dahliae#reduced_virulence__unaffected_pathogenicity__increased_virulence_(hypervirulence)	No definition line	50
MHUMG1_100421	10	2.64403e-14	Q945T9#PHI:653#GIP2#67593#Phytophthora_sojae#effector_(plant_avirulence_determinant)	No definition line	50
MHUMG1_15121	16	2.80941e-14	J9N0G7#PHI:1105#FOXG_08661#5507#Fusarium_oxysporum#unaffected_pathogenicity	No definition line	50
MHUMG1_10321	72	3.78298e-14	G4MUR7#PHI:4475#MoTup1#318829#Magnaporthe_oryzae#loss_of_pathogenicity	No definition line	50
MHUMG1_82511	12	5.76904e-14	G4NCI6#PHI:6612#Mocapn9#318829#Magnaporthe_oryzae#unaffected_pathogenicity__reduced_virulence	No definition line	50
MHUMG1_3801	18	1.27654e-13	Q9UWF0#PHI:2108#CAM#318829#Magnaporthe_oryzae#reduced_virulence__loss_of_pathogenicity	No definition line	50
MHUMG1_88331	24	1.46038e-13	Q96VB3#PHI:509#AFT3#5599#Alternaria_alternata#loss_of_pathogenicity	No definition line	50
MHUMG1_7141	26	2.23199e-13	Q8Y0J2#PHI:5271#fabG1#305#Ralstonia_solanacearum#lethal	No definition line	50
MHUMG1_33871	9	4.7121e-13	Q836A5#PHI:8543#AlsS#1351#Enterococcus_faecalis#reduced_virulence	No definition line	50
MHUMG1_95391	5	5.85566e-13	G4MPR7#PHI:5652#FZC55#318829#Magnaporthe_oryzae#unaffected_pathogenicity	No definition line	50
MHUMG1_42171	21	7.39278e-13	Q4WNM3#PHI:2552#NOP4#746128#Aspergillus_fumigatus#lethal	No definition line	50
MHUMG1_26201	4	2.10247e-12	D2EAY0#PHI:2602#Rim9#5270#Ustilago_maydis#unaffected_pathogenicity	No definition line	50
MHUMG1_9941	12	2.60986e-12	A5IYL7#PHI:6517#adhT#2110#Mycoplasma_agalactiae#reduced_virulence	No definition line	50
MHUMG1_53061	7	3.75442e-12	I1RE06#PHI:1356#GzC2H016#5518#Fusarium_graminearum#unaffected_pathogenicity	No definition line	50
MHUMG1_74981	251	6.27632e-12	I1RP25#PHI:1225#FGSG_05775#5518#Fusarium_graminearum#lethal	No definition line	50
MHUMG1_78771	31	6.88544e-12	A0A1W5T7B8#PHI:7243#pks15#176275#Beauveria_bassiana#reduced_virulence	No definition line	50
MHUMG1_19631	10	1.52702e-11	D2E9W7#PHI:2376#DEP2#29001#Alternaria_brassicicola#reduced_virulence__unaffected_pathogenicity	No definition line	50
MHUMG1_85851	215	2.32704e-11	I1RER7#PHI:1930#GzZC245#5518#Fusarium_graminearum#unaffected_pathogenicity	No definition line	50
MHUMG1_37051	7	2.76202e-11	D7UQ40#PHI:3347#sol5#48100#Alternaria_solani#unaffected_pathogenicity	No definition line	50
MHUMG1_91071	42	2.77418e-11	A0AUJ1#PHI:4182#Gib2#5207#Cryptococcus_neoformans#reduced_virulence	No definition line	50
MHUMG1_77091	7	2.77443e-11	I1RD96#PHI:3984#FGSG_01588_(Sc_gpi7)#5518#Fusarium_graminearum#unaffected_pathogenicity	No definition line	50
MHUMG1_891	14	4.16085e-11	Q4WK03#PHI:2544#PAB1#746128#Aspergillus_fumigatus#lethal	No definition line	50
MHUMG1_96951	78	4.20557e-11	A0AUJ1#PHI:4182#Gib2#5207#Cryptococcus_neoformans#reduced_virulence	No definition line	50
MHUMG1_11821	8	4.7776e-11	I1RSE4#PHI:1096#FGSG_07062#5518#Fusarium_graminearum#unaffected_pathogenicity	No definition line	50
MHUMG1_92031	13	1.42792e-10	A0A0Q0B337#PHI:6649#iaaM#29438#Pseudomonas_savastanoi#reduced_virulence	No definition line	50
MHUMG1_70701	13	4.15814e-10	P0AA28#PHI:2644#thioredoxin_1#28901#Salmonella_enterica#reduced_virulence	No definition line	50
MHUMG1_55141	251	8.43663e-10	I1RA81#PHI:1198#(Sc_Ssk2/Ssk22)#5518#Fusarium_graminearum#reduced_virulence	No definition line	50
MHUMG1_33991	14	1.15706e-09	G4NCI6#PHI:6612#Mocapn9#318829#Magnaporthe_oryzae#unaffected_pathogenicity__reduced_virulence	No definition line	50
MHUMG1_80591	7	1.60053e-09	G0T3B3#PHI:2401#CaRING1#339__317__272952#Xanthomonas_campestris__Pseudomonas_syringae__Hyaloperonospora_arabidopsidis#increased_virulence_(hypervirulence)__reduced_virulence	No definition line	50
MHUMG1_86421	10	1.88679e-09	G4MMK2#PHI:3975#MoIlv2#318829#Magnaporthe_oryzae#loss_of_pathogenicity	No definition line	50
MHUMG1_8611	27	2.27591e-09	A0A125YUL2#PHI:7744#ANK1_(TGME49_216140)#5811#Toxoplasma_gondii#reduced_virulence	No definition line	50
MHUMG1_56261	29	2.57235e-09	Q9C1E9#PHI:226#PEX6#5462#Colletotrichum_lagenaria#loss_of_pathogenicity	No definition line	50
MHUMG1_83221	7	4.4716e-09	Q9P304#PHI:199#AOX1#5499#Passalora_fulva#reduced_virulence	No definition line	50
MHUMG1_82791	30	8.15936e-09	I1RUC7#PHI:1260#FGSG_07816#5518#Fusarium_graminearum#unaffected_pathogenicity	No definition line	50
MHUMG1_71411	13	1.9106e-08	I1RGR6#PHI:1323#GzbZIP005#5518#Fusarium_graminearum#unaffected_pathogenicity	No definition line	50
MHUMG1_86001	5	2.31414e-08	F6K8L6#PHI:2841#CnSEC14-2#5207#Cryptococcus_neoformans#unaffected_pathogenicity	No definition line	50
MHUMG1_82571	61	2.52842e-08	G4NA57#PHI:5691#FZC86#318829#Magnaporthe_oryzae#unaffected_pathogenicity	No definition line	50
MHUMG1_105491	38	2.67292e-08	I1S2J8#PHI:9037#fgm4_(FGSG_10994)#5518#Fusarium_graminearum#reduced_virulence	No definition line	50
MHUMG1_70851	12	3.11673e-08	I1RU69#PHI:1393#GzC2H056#5518#Fusarium_graminearum#unaffected_pathogenicity	No definition line	50
MHUMG1_53661	13	8.61502e-08	Q4WBL9#PHI:4672#AmcA#746128#Aspergillus_fumigatus#unaffected_pathogenicity	No definition line	50
MHUMG1_66041	17	9.25364e-08	B2HHI1#PHI:3364#MMAR_1663#1781#Mycobacterium_marinum#reduced_virulence	No definition line	50
MHUMG1_87001	131	1.01083e-07	I1RCM9#PHI:1354#GzC2H014#5518#Fusarium_graminearum#reduced_virulence	No definition line	50
MHUMG1_9851	7	1.07826e-07	I1S828#PHI:1503#GzHMG035#5518#Fusarium_graminearum#unaffected_pathogenicity	No definition line	50
MHUMG1_29971	12	1.29981e-07	A0A290WH42#PHI:7707#VEDA_05197#27337#Verticillium_dahliae#reduced_virulence__unaffected_pathogenicity__increased_virulence_(hypervirulence)	No definition line	50
MHUMG1_63071	15	4.34548e-07	Q4WK03#PHI:2544#PAB1#746128#Aspergillus_fumigatus#lethal	No definition line	50
MHUMG1_13741	11	6.58456e-07	G7TM49#PHI:7791#AroE_(XOC_4333)#347#Xanthomonas_oryzae#reduced_virulence	No definition line	50
MHUMG1_58291	19	7.38363e-07	W7N2B4#PHI:3381#FVEG_12533#117187#Fusarium_verticillioides#unaffected_pathogenicity	No definition line	50
MHUMG1_93171	11	8.48686e-07	J9VUY6#PHI:6871#gua1#5207#Cryptococcus_neoformans#loss_of_pathogenicity	No definition line	50
MHUMG1_57701	7	1.46548e-06	U3PW09#PHI:7047#Aqp1#5207#Cryptococcus_neoformans#unaffected_pathogenicity	No definition line	50
MHUMG1_20641	19	6.27074e-06	Q8RP09#PHI:981#hopI1#317#Pseudomonas_syringae#effector_(plant_avirulence_determinant)	No definition line	50
MHUMG1_73251	16	8.49438e-06	G7TM40#PHI:7754#AnkB_(XOC_4324)#347#Xanthomonas_oryzae#reduced_virulence	No definition line	50
MHUMG1_18341	6	9.82629e-06	I1RWB8#PHI:1402#GzC2H065#5518#Fusarium_graminearum#unaffected_pathogenicity	No definition line	50

## Sheet: MrobertsiiARSEF23
Query	Number of HSPs	Lowest E-value	Accession (E-value)	Description (E-value)	Greatest identity %
MHUMG1_8031	257	0	E9EX34#PHI:5434#Mero-Bck1#568076#Metarhizium_robertsii#reduced_virulence	No definition line	100
MHUMG1_13121	4	0	E9EQM1#PHI:3817#mrGAT#568076#Metarhizium_robertsii#reduced_virulence	No definition line	100
MHUMG1_23681	5	0	E9F1A7#PHI:6380#mrLPAAT1#568076#Metarhizium_robertsii#reduced_virulence	No definition line	100
MHUMG1_23861	154	0	E9F189#PHI:4125#MrpacC#568076#Metarhizium_robertsii#reduced_virulence	No definition line	100
MHUMG1_25161	253	0	E9F0W4#PHI:5432#Mero-Mkk1/2#568076#Metarhizium_robertsii#reduced_virulence	No definition line	100
MHUMG1_30431	256	0	E9EZF4#PHI:5429#Mero-Ime2#568076#Metarhizium_robertsii#unaffected_pathogenicity	No definition line	100
MHUMG1_33391	257	0	E9EYM7#PHI:5427#Mero-Hog1#568076#Metarhizium_robertsii#reduced_virulence	No definition line	100
MHUMG1_41951	32	0	I1RWG5#PHI:1448__PHI:2430#GzGATA006__areA#5518#Fusarium_graminearum#unaffected_pathogenicity__reduced_virulence	No definition line	100
MHUMG1_44861	262	0	E9EU30#PHI:5433#Mero-Ste11#568076#Metarhizium_robertsii#unaffected_pathogenicity	No definition line	100
MHUMG1_45261	11	0	E9ETZ6#PHI:7251#Mrtdc#568076#Metarhizium_robertsii#reduced_virulence	No definition line	100
MHUMG1_65111	253	0	E9EWM2#PHI:5430#Mero-Ste7#568076#Metarhizium_robertsii#reduced_virulence	No definition line	100
MHUMG1_66481	255	0	E9EW91#PHI:5435#Mero-Ssk2#568076#Metarhizium_robertsii#reduced_virulence	No definition line	100
MHUMG1_71271	85	0	E9F4P0#PHI:3069#MrAC#568076#Metarhizium_robertsii#reduced_virulence	No definition line	100
MHUMG1_82251	254	0	E9EJ96#PHI:5431#Mero-Pbs2#568076#Metarhizium_robertsii#reduced_virulence	No definition line	100
MHUMG1_89721	254	0	E9EMQ0#PHI:3328#MrKu70#568076#Metarhizium_robertsii#unaffected_pathogenicity	No definition line	100
MHUMG1_57531	1	1.10643e-162	E9ESA9#PHI:8804#MrSVP_(EFZ01626)#568076#Metarhizium_robertsii#reduced_virulence	No definition line	100
MHUMG1_88311	6	3.23536e-102	P0CS02#PHI:3489#Gmt1#5207#Cryptococcus_neoformans#loss_of_pathogenicity	No definition line	100
MHUMG1_27531	17	0	P29138#PHI:4615#Pr1#5530#Metarhizium_anisopliae#unaffected_pathogenicity	No definition line	99.4845
MHUMG1_27471	229	0	E9F082#PHI:2323#mhk1#568076#Metarhizium_robertsii#reduced_virulence	No definition line	99.1564
MHUMG1_78161	5	0	E9F2M8#PHI:7757#Mrpem_(MAA_06426)#568076#Metarhizium_robertsii#unaffected_pathogenicity	No definition line	98.7817
MHUMG1_40581	254	0	I1RWQ2#PHI:1235#FGSG_08731#5518#Fusarium_graminearum#lethal	No definition line	98.6376
MHUMG1_55791	6	1.15104e-101	I1S1V9#PHI:1604#GzOB045#5518#Fusarium_graminearum#unaffected_pathogenicity	No definition line	98.6207
MHUMG1_72521	26	0	E9DS54#PHI:8769#MaPpt1#92637#Metarhizium_acridum#unaffected_pathogenicity	No definition line	98.5263
MHUMG1_55721	13	1.62332e-82	A0A0D2Y8P9#PHI:7588#Foatg8#5507#Fusarium_oxysporum#reduced_virulence	No definition line	98.2759
MHUMG1_45331	39	0	Q96VA7#PHI:251#FGA1#5507#Fusarium_oxysporum#reduced_virulence	No definition line	98.2405
MHUMG1_72431	24	4.25977e-69	G4MNE6#PHI:2109#CNB#318829#Magnaporthe_oryzae#reduced_virulence__loss_of_pathogenicity	No definition line	98.0769
MHUMG1_41671	3	1.14377e-84	I1RWI5#PHI:1590#GzOB030#5518#Fusarium_graminearum#lethal	No definition line	97.7941
MHUMG1_64531	6	0	E9EJG5#PHI:7756#Mrpct_(MAA_00035)#568076#Metarhizium_robertsii#reduced_virulence	No definition line	97.6744
MHUMG1_72321	35	0	I1RT81#PHI:6410__PHI:6604#FgCdc12__FaCdc12(FGSG_07380)#5518__282267#Fusarium_graminearum__Fusarium_asiaticum#reduced_virulence	No definition line	97.6501
MHUMG1_25001	187	0	E9DSK0#PHI:7629#MaSte12#92637#Metarhizium_acridum#reduced_virulence	No definition line	97.5783
MHUMG1_60951	256	0	E9ESS9#PHI:5428#Mero-Slt2#568076#Metarhizium_robertsii#loss_of_pathogenicity	No definition line	97.2093
MHUMG1_26961	6	3.52393e-155	I1RRW3#PHI:1658#GzCCCH002#5518#Fusarium_graminearum#unaffected_pathogenicity	No definition line	97.1154
MHUMG1_44471	36	6.59428e-125	G4NC11#PHI:2052#Cdc42#318829#Magnaporthe_oryzae#reduced_virulence	No definition line	97.093
MHUMG1_83341	257	0	I1RAY2#PHI:1218#FGSG_00677#5518#Fusarium_graminearum#lethal	No definition line	96.6767
MHUMG1_70831	44	0	I1RC95#PHI:1566#GzOB006#5518#Fusarium_graminearum#lethal	No definition line	96.6752
MHUMG1_27761	14	0	I1RZP2#PHI:1667#GzCCHC007#5518#Fusarium_graminearum#unaffected_pathogenicity	No definition line	96.6667
MHUMG1_13981	10	0	P41388#PHI:820#beta-tubulin#5025#Venturia_inaequalis#chemistry_target:_resistance_to_chemical	No definition line	96.4824
MHUMG1_30251	9	0	P53376#PHI:823#beta-tubulin#914237#Rhynchosporium_commune#chemistry_target:_resistance_to_chemical	No definition line	96.3061
MHUMG1_65291	271	0	E9E8J3#PHI:3263#MaSnf1#92637#Metarhizium_acridum#reduced_virulence	No definition line	96.0383
MHUMG1_102571	205	0	E9E402#PHI:7114#Crz1#92637#Metarhizium_acridum#reduced_virulence	No definition line	96.0219
MHUMG1_24341	24	0	Q4WJS6#PHI:6753#GlcA#746128#Aspergillus_fumigatus#lethal	No definition line	95.9877
MHUMG1_105011	255	0	I1RT36#PHI:1200__PHI:4587#(Gsk3)__Fgk3#5518#Fusarium_graminearum#reduced_virulence__loss_of_pathogenicity	No definition line	95.873
MHUMG1_9131	1	1.26288e-61	Q4HTT1#PHI:1468#GzCCAAT008#5518#Fusarium_graminearum#unaffected_pathogenicity	No definition line	95.7627
MHUMG1_77561	5	1.60828e-97	G4MVC5#PHI:6927#MoRAD6#318829#Magnaporthe_oryzae#reduced_virulence	No definition line	95.5556
MHUMG1_83781	21	2.32029e-41	J5K974#PHI:6470#Trr1#176275#Beauveria_bassiana#unaffected_pathogenicity	No definition line	95.5224
MHUMG1_65961	167	1.56204e-73	I1RSD5#PHI:1384#GzC2H047#5518#Fusarium_graminearum#reduced_virulence	No definition line	95.4955
MHUMG1_8841	253	0	E9EWV4#PHI:5426#Mero-Fus3#568076#Metarhizium_robertsii#reduced_virulence	No definition line	95.493
MHUMG1_9801	85	0	I1RJS2#PHI:1015#GzGPB1#5518#Fusarium_graminearum#reduced_virulence	No definition line	95.3425
MHUMG1_83401	4	6.41084e-113	I1RAX7#PHI:1563#GzOB003#5518#Fusarium_graminearum#unaffected_pathogenicity	No definition line	95
MHUMG1_71641	7	2.87207e-164	J4UI12#PHI:3271#ARSEF_2860#176275#Beauveria_bassiana#reduced_virulence	No definition line	94.7826
MHUMG1_78641	33	3.15649e-132	N4VQQ5#PHI:3280#CoRAS1#5465#Colletotrichum_orbiculare#lethal	No definition line	94.3662
MHUMG1_72851	27	0	A0A346QRX8#PHI:8782#MaMid1#92637#Metarhizium_acridum#reduced_virulence	No definition line	94.2238
MHUMG1_6481	3	0	I1REF2#PHI:3138#ELP3#5518#Fusarium_graminearum#reduced_virulence	No definition line	94.1071
MHUMG1_24511	260	0	I1RSW5#PHI:1199__PHI:3087#(Sc_Tpk2)__CPK1#5518#Fusarium_graminearum#reduced_virulence__loss_of_pathogenicity	No definition line	93.9759
MHUMG1_20781	256	0	I1RZ37#PHI:1237#FGSG_09660#5518#Fusarium_graminearum#lethal	No definition line	93.913
MHUMG1_63571	17	0	I6PDX4#PHI:7596#MakatG1#92637#Metarhizium_acridum#reduced_virulence__unaffected_pathogenicity	No definition line	93.8692
MHUMG1_4631	23	0	Q2PEN8#PHI:577#NoxB#35717#Epichloe_festucae#unaffected_pathogenicity	No definition line	93.7956
MHUMG1_84711	27	0	Q2PEP0#PHI:576#NoxA#35717#Epichloe_festucae#enhanced_antagonism	No definition line	93.7163
MHUMG1_26341	3	3.25034e-179	I1RS24#PHI:1584#GzOB024#5518#Fusarium_graminearum#unaffected_pathogenicity	No definition line	93.7008
MHUMG1_89741	26	0	I1RMW3#PHI:6408__PHI:6603#FgCdc3__FaCdc3_(FGSG_05315.3)#5518__282267#Fusarium_graminearum__Fusarium_asiaticum#reduced_virulence	No definition line	93.5961
MHUMG1_54541	22	0	I1RPQ7#PHI:6411#FgCdc10#5518#Fusarium_graminearum#unaffected_pathogenicity	No definition line	93.2153
MHUMG1_13151	101	0	G4MY65#PHI:7317#Tpc1#318829#Magnaporthe_oryzae#reduced_virulence	No definition line	93.007
MHUMG1_45731	8	5.94476e-50	I1RNC6#PHI:1465#GzCCAAT005#5518#Fusarium_graminearum#unaffected_pathogenicity	No definition line	92.9412
MHUMG1_31411	29	1.09694e-41	Q5EMY3#PHI:860#MSP1#318829#Magnaporthe_oryzae#reduced_virulence	No definition line	92.8571
MHUMG1_17491	10	0	E9EPV1#PHI:4554#MBZ1#568076#Metarhizium_robertsii#reduced_virulence	No definition line	92.7336
MHUMG1_33411	46	0	Q65YU2#PHI:395#FGA2#5507#Fusarium_oxysporum#loss_of_pathogenicity	No definition line	92.3944
MHUMG1_22011	129	0	G4N3D8#PHI:5622#FZC28#318829#Magnaporthe_oryzae#unaffected_pathogenicity	No definition line	92.3077
MHUMG1_54061	9	0	I1RM09#PHI:2325__PHI:2502__PHI:5724#TEP1__FgTep1p__ScOrtholog_TEP1#5518#Fusarium_graminearum#reduced_virulence	No definition line	92.3077
MHUMG1_21101	3	5.61764e-48	A0N0D1#PHI:2216#PemG1#318829#Magnaporthe_oryzae#effector_(plant_avirulence_determinant)	No definition line	92.3077
MHUMG1_82451	16	4.35753e-103	Q96VL0#PHI:769#CPSOD1#5111#Claviceps_purpurea#unaffected_pathogenicity	No definition line	92.2078
MHUMG1_56311	61	0	Q5YCX0#PHI:336#CHS2#5507#Fusarium_oxysporum#reduced_virulence	No definition line	92.0398
MHUMG1_6571	12	0	I1REC7#PHI:6272#FgHSP90#5518#Fusarium_graminearum#reduced_virulence	No definition line	91.9811
MHUMG1_60071	14	4.48062e-124	Q6IZ78#PHI:3908#ZrfA#746128#Aspergillus_fumigatus#reduced_virulence__loss_of_pathogenicity	No definition line	91.6667
MHUMG1_16201	7	0	Q4WKG5#PHI:2530#TUB1#746128#Aspergillus_fumigatus#lethal__loss_of_pathogenicity	No definition line	91.5367
MHUMG1_40381	7	1.75001e-50	Q4IPZ1#PHI:1564#GzOB004#5518#Fusarium_graminearum#unaffected_pathogenicity	No definition line	91.0256
MHUMG1_54581	7	0	I1S7N4#PHI:2386#ACL1#5518#Fusarium_graminearum#loss_of_pathogenicity	No definition line	90.9756
MHUMG1_35441	8	0	A0A0D2XDM3#PHI:4724#gls1#5507#Fusarium_oxysporum#unaffected_pathogenicity	No definition line	90.5767
MHUMG1_108491	23	0	I1RYH0#PHI:6409#FgCdc11#5518#Fusarium_graminearum#reduced_virulence	No definition line	90.5512
MHUMG1_58171	252	0	I1S050#PHI:1203#(Sc_Yck1/2/3)#5518#Fusarium_graminearum#reduced_virulence	No definition line	90.5495
MHUMG1_70721	257	0	Q5K2R7#PHI:393#CpCOT1#5111#Claviceps_purpurea#loss_of_pathogenicity	No definition line	90.5097
MHUMG1_7041	11	0	J4UUB6#PHI:6972#TpsA#176275#Beauveria_bassiana#reduced_virulence	No definition line	90.2584
MHUMG1_71781	4	1.13775e-101	W7MUL2#PHI:7142#FvStp1#117187#Fusarium_verticillioides#reduced_virulence	No definition line	90.2299
MHUMG1_79121	46	2.15314e-136	Q96VL3#PHI:339#CLPT1#290576#Colletotrichum_lindemuthianum#reduced_virulence	No definition line	90.1478
MHUMG1_69361	2	0	I1RC52#PHI:6092#FgVps26#5518#Fusarium_graminearum#reduced_virulence	No definition line	90
MHUMG1_65711	12	0	I1RSF7#PHI:1385#GzC2H048#5518#Fusarium_graminearum#unaffected_pathogenicity	No definition line	89.9142
MHUMG1_58981	32	1.86917e-131	I1S095#PHI:861#RAS2#5518#Fusarium_graminearum#reduced_virulence	No definition line	89.8305
MHUMG1_20981	36	2.3189e-106	I1RMT2#PHI:1940#GzZC255#5518#Fusarium_graminearum#unaffected_pathogenicity	No definition line	89.7959
MHUMG1_72201	2	1.19626e-36	I1RT69#PHI:1918#GzZC233#5518#Fusarium_graminearum#unaffected_pathogenicity	No definition line	89.4737
MHUMG1_57981	24	0	G4N4N6#PHI:4616#MoSFA1#318829#Magnaporthe_oryzae#reduced_virulence	No definition line	89.4459
MHUMG1_32901	10	0	G4N6S1#PHI:8610#gcn5_(MGG_03677)#318829#Magnaporthe_oryzae#reduced_virulence__unaffected_pathogenicity	No definition line	89.2768
MHUMG1_66181	10	0	I1RA52#PHI:445#NOS1#5518#Fusarium_graminearum#reduced_virulence	No definition line	89.0323
MHUMG1_24111	3	0	I1RST1#PHI:1491#GzHMG023#5518#Fusarium_graminearum#lethal	No definition line	89.022
MHUMG1_57201	9	0	G4ML75#PHI:4688#MET6#318829#Magnaporthe_oryzae#loss_of_pathogenicity	No definition line	88.9034
MHUMG1_30451	31	0	I1RKK5#PHI:1289#FGSG_04416#5518#Fusarium_graminearum#unaffected_pathogenicity	No definition line	88.8383
MHUMG1_43911	253	0	I1RN31#PHI:1223#FGSG_05393#5518#Fusarium_graminearum#lethal	No definition line	88.7879
MHUMG1_74961	15	0	Q4U4T0#PHI:2388#Chi2#5530#Metarhizium_anisopliae#increased_virulence_(hypervirulence)__reduced_virulence	No definition line	88.7828
MHUMG1_16521	9	0	Q8TGD1#PHI:254#FOW1#5507#Fusarium_oxysporum#reduced_virulence	No definition line	88.746
MHUMG1_36721	20	0	G4N168#PHI:2063__PHI:2110#MCNA__MGG_07456.5#318829#Magnaporthe_oryzae#reduced_virulence__unaffected_pathogenicity	No definition line	88.7189
MHUMG1_31651	13	0	I1RE46#PHI:1570#GzOB010#5518#Fusarium_graminearum#unaffected_pathogenicity	No definition line	88.6463
MHUMG1_66581	12	4.9333e-177	Q4IQT8#PHI:1618#GzFET5#5518#Fusarium_graminearum#unaffected_pathogenicity	No definition line	88.6207
MHUMG1_53341	93	0	Q4WQK8#PHI:6111#CpcB#746128#Aspergillus_fumigatus#reduced_virulence	No definition line	88.6076
MHUMG1_49721	454	0	I1RGD6#PHI:1193#(Sc_Sky1)#5518#Fusarium_graminearum#reduced_virulence	No definition line	88.4692
MHUMG1_27141	7	2.62678e-168	J5K8Q8#PHI:3270#ARSEF_2860#176275#Beauveria_bassiana#reduced_virulence	No definition line	88.4615
MHUMG1_102411	6	2.61623e-48	G4MPJ3#PHI:8038__PHI:8045#Mosmt3__Smt3#318829#Magnaporthe_oryzae#reduced_virulence	No definition line	88.4615
MHUMG1_80771	8	0	W7M5P0#PHI:2916#Ppr2#117187#Fusarium_verticillioides#unaffected_pathogenicity	No definition line	88.3797
MHUMG1_82701	8	1.70744e-72	I1RW90#PHI:1627#GzTF2S002#5518#Fusarium_graminearum#unaffected_pathogenicity	No definition line	88.1818
MHUMG1_34021	27	0	Q6QIY0#PHI:2382#Upa2#5270#Ustilago_maydis#unaffected_pathogenicity	No definition line	88.1188
MHUMG1_73251	30	0	I1RTG5#PHI:6245#FaMyo2B#5518#Fusarium_graminearum#reduced_virulence	No definition line	88.0606
MHUMG1_17461	7	1.4796e-134	I1RD63#PHI:6093#FgVps29#5518#Fusarium_graminearum#reduced_virulence	No definition line	88.0597
MHUMG1_43441	24	9.19136e-93	Q9UWF0#PHI:2108#CAM#318829#Magnaporthe_oryzae#reduced_virulence__loss_of_pathogenicity	No definition line	88.024
MHUMG1_3661	28	0	I1REJ1#PHI:1662#GzCCHC002#5518#Fusarium_graminearum#unaffected_pathogenicity	No definition line	88.009
MHUMG1_83271	48	4.20217e-143	G4MWX1#PHI:7134#MoRab5B#318829#Magnaporthe_oryzae#reduced_virulence	No definition line	87.8378
MHUMG1_53551	255	0	I1RP88#PHI:1226#FGSG_05845#5518#Fusarium_graminearum#lethal	No definition line	87.7358
MHUMG1_12251	49	0	J4W8U0#PHI:6280#bmiro#176275#Beauveria_bassiana#reduced_virulence	No definition line	87.7193
MHUMG1_4491	3	2.8375e-38	I1S219#PHI:1652#GzWing024#5518#Fusarium_graminearum#unaffected_pathogenicity	No definition line	87.6712
MHUMG1_78251	31	1.39894e-45	G4N4Y2#PHI:2176#ASD4#318829#Magnaporthe_oryzae#loss_of_pathogenicity	No definition line	87.234
MHUMG1_32221	19	1.36098e-105	W7LLK3#PHI:7143#FvCYP1#117187#Fusarium_verticillioides#reduced_virulence	No definition line	87.2222
MHUMG1_37261	19	0	J4UEM9#PHI:8044#hos2#176275#Beauveria_bassiana#reduced_virulence	No definition line	87.1227
MHUMG1_54571	5	0	I1RPR1#PHI:2387#ACL2#5518#Fusarium_graminearum#loss_of_pathogenicity	No definition line	87.1166
MHUMG1_7861	258	0	I1RA20#PHI:1244#FGSG_00337#5518#Fusarium_graminearum#unaffected_pathogenicity	No definition line	87.0968
MHUMG1_32761	11	2.04391e-142	I1R9X6#PHI:8908#FgVPS28_(FGSG_00291)#5518#Fusarium_graminearum#reduced_virulence	No definition line	86.9748
MHUMG1_31381	11	0	A0A0D2YC96#PHI:4725#gbe1#5507#Fusarium_oxysporum#unaffected_pathogenicity	No definition line	86.9469
MHUMG1_99531	13	0	G4N8A1#PHI:2087#Moatg26#318829#Magnaporthe_oryzae#unaffected_pathogenicity	No definition line	86.8852
MHUMG1_83701	12	0	G4N6P6#PHI:8695#MoImd4_(MGG_03699)#318829#Magnaporthe_oryzae#reduced_virulence	No definition line	86.8421
MHUMG1_10671	12	0	I1RV69#PHI:1234#FGSG_08133#5518#Fusarium_graminearum#lethal	No definition line	86.7242
MHUMG1_96051	34	1.83485e-113	I1RFZ8#PHI:1663#GzCCHC003#5518#Fusarium_graminearum#unaffected_pathogenicity	No definition line	86.6667
MHUMG1_9041	27	1.22597e-65	Q5AG40#PHI:2553#VPS4#5476#Candida_albicans#loss_of_pathogenicity	No definition line	86.6667
MHUMG1_19351	114	1.00346e-13	W2E906#PHI:3274#dhbF#1464#Paenibacillus_larvae#unaffected_pathogenicity	No definition line	86.6667
MHUMG1_92671	37	1.60383e-115	G4MYS1#PHI:4736#MoYpt7#318829#Magnaporthe_oryzae#loss_of_pathogenicity	No definition line	86.5979
MHUMG1_17771	4	1.87817e-175	G4MQZ2#PHI:2038#Mir1#318829#Magnaporthe_oryzae#unaffected_pathogenicity	No definition line	86.5132
MHUMG1_56051	7	1.40918e-70	I1RK79#PHI:1577#GzOB017#5518#Fusarium_graminearum#unaffected_pathogenicity	No definition line	86.4865
MHUMG1_5731	5	2.49094e-119	I1RM35#PHI:1580#GzOB020#5518#Fusarium_graminearum#unaffected_pathogenicity	No definition line	86.4583
MHUMG1_88881	69	2.43358e-51	I1RXZ0#PHI:1467#GzCCAAT007#5518#Fusarium_graminearum#unaffected_pathogenicity	No definition line	86.4078
MHUMG1_26061	270	0	B0B5Z9#PHI:1037#Cla4#5111#Claviceps_purpurea#loss_of_pathogenicity	No definition line	86.3469
MHUMG1_77071	104	0	I1RQ34#PHI:1377#GzC2H040#5518#Fusarium_graminearum#unaffected_pathogenicity	No definition line	86.3014
MHUMG1_66591	4	0	G4NCL5#PHI:877#MGG_00383#318829#Magnaporthe_oryzae#reduced_virulence	No definition line	86.1893
MHUMG1_64641	11	0	I1S0N5#PHI:1552#GzMyb016#5518#Fusarium_graminearum#unaffected_pathogenicity	No definition line	85.7939
MHUMG1_79331	18	0	I1RQ89#PHI:1641__PHI:2434#FgFlbA#5518#Fusarium_graminearum#reduced_virulence	No definition line	85.7438
MHUMG1_62431	24	0	I1V1W1#PHI:6207#BbCyp6#176275#Beauveria_bassiana#reduced_virulence	No definition line	85.7143
MHUMG1_25611	5	9.53613e-114	I1RRN6#PHI:1547#GzMyb011#5518#Fusarium_graminearum#unaffected_pathogenicity	No definition line	85.7143
MHUMG1_41141	14	2.6003e-96	W7LTW0#PHI:3355__PHI:4514#Mads1__Fvmcm1#117187#Fusarium_verticillioides#unaffected_pathogenicity__reduced_virulence	No definition line	85.7143
MHUMG1_89161	11	0	I1RE58#PHI:443#CBL1#5518#Fusarium_graminearum#reduced_virulence	No definition line	85.3933
MHUMG1_41941	254	0	I1RWG6#PHI:1187#(Sc_Dbf2/Dbf20)#5518#Fusarium_graminearum#reduced_virulence	No definition line	84.8802
MHUMG1_17571	247	0	I1RD74#PHI:1961#GzZC276#5518#Fusarium_graminearum#unaffected_pathogenicity	No definition line	84.6154
MHUMG1_27891	102	1.94827e-156	Q4HYC1#PHI:1201#(Bud32)#5518#Fusarium_graminearum#reduced_virulence	No definition line	84.6154
MHUMG1_55001	4	1.59788e-06	I1S242#PHI:1499#GzHMG031#5518#Fusarium_graminearum#unaffected_pathogenicity	No definition line	84.6154
MHUMG1_9551	19	0	A0JC82#PHI:578#NoxR#35717#Epichloe_festucae#enhanced_antagonism	No definition line	84.5857
MHUMG1_89801	138	1.27784e-129	Q0WXM3#PHI:734#FOW2#5507#Fusarium_oxysporum#loss_of_pathogenicity	No definition line	84.434
MHUMG1_12471	24	0	Q4WK03#PHI:2544#PAB1#746128#Aspergillus_fumigatus#lethal	No definition line	84.4237
MHUMG1_27561	8	0	F9WWR1#PHI:4966#sdi1#1047171#Zymoseptoria_tritici#unaffected_pathogenicity	No definition line	84.3902
MHUMG1_97071	4	1.08885e-76	I1S1V9#PHI:1604#GzOB045#5518#Fusarium_graminearum#unaffected_pathogenicity	No definition line	84.2857
MHUMG1_89671	30	0	A0A016PX00#PHI:4602#FDB2#5518#Fusarium_graminearum#reduced_virulence	No definition line	84.2837
MHUMG1_7691	4	3.93941e-110	Q4IR08#PHI:1608#GzP53L001#5518#Fusarium_graminearum#unaffected_pathogenicity	No definition line	84.186
MHUMG1_4551	10	2.42529e-128	I1S215#PHI:2400#Fgp2#5518#Fusarium_graminearum#unaffected_pathogenicity	No definition line	84.1584
MHUMG1_37791	4	0	I1RG99#PHI:6091#FgVps35#5518#Fusarium_graminearum#reduced_virulence	No definition line	84.0728
MHUMG1_66291	18	3.43327e-40	Q2Q466#PHI:1063#MNH6#318829#Magnaporthe_oryzae#reduced_virulence	No definition line	84.058
MHUMG1_58041	3	0	I1S0H5#PHI:7717#FgOXP1#5518#Fusarium_graminearum#reduced_virulence	No definition line	83.9207
MHUMG1_5441	4	0	I1S7F8#PHI:1553#GzMyb017#5518#Fusarium_graminearum#reduced_virulence	No definition line	83.9109
MHUMG1_70891	21	0	E9R5E2#PHI:2513#GFA1#746128#Aspergillus_fumigatus#lethal__loss_of_pathogenicity	No definition line	83.8571
MHUMG1_10061	3	0	Q5YCW8#PHI:337#CHS7#5507#Fusarium_oxysporum#reduced_virulence	No definition line	83.8323
MHUMG1_24261	60	0	I1RSU2#PHI:724__PHI:730#PKS9__KSA1#5518#Fusarium_graminearum#unaffected_pathogenicity	No definition line	83.5681
MHUMG1_82441	5	0	I1RWP4#PHI:1530#Gzsnd#5518#Fusarium_graminearum#unaffected_pathogenicity	No definition line	83.5214
MHUMG1_68971	41	0	I1RBR4#PHI:2908#Cyp51B#5518#Fusarium_graminearum#unaffected_pathogenicity__reduced_virulence	No definition line	83.4601
MHUMG1_28301	42	0	I1RZX9#PHI:1014#GzGPA3#5518#Fusarium_graminearum#unaffected_pathogenicity	No definition line	83.3333
MHUMG1_77571	21	0	G4MVC4#PHI:5082#MoAcat1#318829#Magnaporthe_oryzae#reduced_virulence	No definition line	83.3333
MHUMG1_61111	75	1.01965e-143	I1S0W9#PHI:1418#GzC2H085#5518#Fusarium_graminearum#lethal	No definition line	83.3333
MHUMG1_31951	7	5.70647e-40	A0A0D2YD74#PHI:5483#FTF1#5507#Fusarium_oxysporum#reduced_virulence	No definition line	83.3333
MHUMG1_70591	93	1.37071e-17	A5F6S0#PHI:4108#fadD#666#Vibrio_cholerae#reduced_virulence__unaffected_pathogenicity	No definition line	83.3333
MHUMG1_36251	41	5.36648e-14	A0A0B5JGW8#PHI:4607#BxCYP33C9#6326#Bursaphelenchus_xylophilus#reduced_virulence	No definition line	83.3333
MHUMG1_33651	9	0	E3QJK7#PHI:6827#GPI8#31870#Colletotrichum_graminicola#loss_of_pathogenicity	No definition line	83.2877
MHUMG1_2151	5	1.40388e-172	G4NC97#PHI:3976#MoIlv6#318829#Magnaporthe_oryzae#loss_of_pathogenicity	No definition line	83.1579
MHUMG1_61761	83	0	I1RT69#PHI:1918#GzZC233#5518#Fusarium_graminearum#unaffected_pathogenicity	No definition line	83.1461
MHUMG1_84411	6	4.82576e-146	Q4IPC8#PHI:1531__PHI:5700#GzSsu72__ScOrtholog_SSU72#5518#Fusarium_graminearum#unaffected_pathogenicity__lethal	No definition line	83.1373
MHUMG1_85591	25	0	W7MHG4#PHI:2462#RGSB#117187#Fusarium_verticillioides#unaffected_pathogenicity	No definition line	83.0601
MHUMG1_67401	15	0	I1RAH4#PHI:1562#GzOB002#5518#Fusarium_graminearum#lethal	No definition line	83.0208
MHUMG1_84121	8	0	J5K938#PHI:7057#PilA#176275#Beauveria_bassiana#reduced_virulence	No definition line	83.0028
MHUMG1_70681	6	3.00968e-49	I1RC79#PHI:1462#GzCCAAT002#5518#Fusarium_graminearum#reduced_virulence	No definition line	82.9545
MHUMG1_27701	16	0	I1RSI4#PHI:1587#GzOB027#5518#Fusarium_graminearum#unaffected_pathogenicity	No definition line	82.9448
MHUMG1_71131	4	8.16482e-102	I1RCB7#PHI:1567#GzOB007#5518#Fusarium_graminearum#unaffected_pathogenicity	No definition line	82.9412
MHUMG1_5501	8	0	I1RNS1#PHI:355#GzmetE#5518#Fusarium_graminearum#reduced_virulence	No definition line	82.9374
MHUMG1_64431	14	2.31678e-90	I1S006#PHI:1650#GzWing022#5518#Fusarium_graminearum#lethal	No definition line	82.9167
MHUMG1_55531	7	2.54038e-66	I1S297#PHI:8912#FgVPS20_(FGSG_10883)#5518#Fusarium_graminearum#reduced_virulence	No definition line	82.8767
MHUMG1_85791	3	2.63387e-95	I1RFN9#PHI:1656#GzYL#5518#Fusarium_graminearum#lethal	No definition line	82.8685
MHUMG1_2421	2	0	I1RA06#PHI:6258#DHS#5518#Fusarium_graminearum#increased_virulence_(hypervirulence)__unaffected_pathogenicity	No definition line	82.808
MHUMG1_77521	7	1.55306e-160	I1RMA5#PHI:4041#spt3#5518#Fusarium_graminearum#reduced_virulence	No definition line	82.7243
MHUMG1_48701	118	2.60875e-158	A0A140CZL2#PHI:6179#AaSSK1#5599#Alternaria_alternata#reduced_virulence	No definition line	82.7027
MHUMG1_73341	9	0	G4MXS1#PHI:8611#pyruvate_kinase#318829#Magnaporthe_oryzae#unaffected_pathogenicity__reduced_virulence__loss_of_pathogenicity	No definition line	82.6667
MHUMG1_79261	4	7.32849e-171	I1RQ81#PHI:1582#GzOB022#5518#Fusarium_graminearum#unaffected_pathogenicity	No definition line	82.5397
MHUMG1_30801	256	0	I1RKH9#PHI:1177#nrc-2#5518#Fusarium_graminearum#reduced_virulence	No definition line	82.5119
MHUMG1_29011	51	0	J5JJ15#PHI:7154#spf1#176275#Beauveria_bassiana#reduced_virulence	No definition line	82.4734
MHUMG1_18711	452	0	G2XBR1#PHI:3708#VdSSP1#27337#Verticillium_dahliae#reduced_virulence	No definition line	82.2485
MHUMG1_102951	51	5.61744e-146	G5EH28#PHI:5598#FZC9#318829#Magnaporthe_oryzae#unaffected_pathogenicity	No definition line	82.1192
MHUMG1_5661	21	0	I1RM25#PHI:1579#GzOB019#5518#Fusarium_graminearum#unaffected_pathogenicity	No definition line	82.1008
MHUMG1_24281	21	1.16771e-38	A0A0U4VHH3#PHI:8637#CspB_(WP_011408744.1)#347#Xanthomonas_oryzae#unaffected_pathogenicity	No definition line	82.0896
MHUMG1_45701	41	1.04113e-118	G4N8I6#PHI:7133#MoRab5A#318829#Magnaporthe_oryzae#reduced_virulence	No definition line	82.0833
MHUMG1_106381	8	0	G4N1E7#PHI:6637#Movps1#318829#Magnaporthe_oryzae#lethal	No definition line	82.066
MHUMG1_95631	17	0	I1RFX8#PHI:1574#GzOB014#5518#Fusarium_graminearum#lethal	No definition line	82
MHUMG1_73001	15	2.65341e-110	J4W023#PHI:7181#cypB#176275#Beauveria_bassiana#reduced_virulence	No definition line	81.9512
MHUMG1_92121	35	0	I1RPV7#PHI:1227#FGSG_06089#5518#Fusarium_graminearum#lethal	No definition line	81.8887
MHUMG1_71421	255	0	Q5K2R7#PHI:393#CpCOT1#5111#Claviceps_purpurea#loss_of_pathogenicity	No definition line	81.8697
MHUMG1_82971	91	0	W7MT31#PHI:3387#FVEG_12523#117187#Fusarium_verticillioides#unaffected_pathogenicity	No definition line	81.8402
MHUMG1_43981	114	0	I1RN37#PHI:1374#GzC2H037#5518#Fusarium_graminearum#unaffected_pathogenicity	No definition line	81.8294
MHUMG1_83791	12	8.09218e-156	J5K974#PHI:6470#Trr1#176275#Beauveria_bassiana#unaffected_pathogenicity	No definition line	81.7814
MHUMG1_89201	203	0	A6N6J8#PHI:1021__PHI:2981#CTF1__Ctf1#5507#Fusarium_oxysporum#unaffected_pathogenicity__reduced_virulence	No definition line	81.6918
MHUMG1_9681	6	5.38483e-59	G4N7A0#PHI:2180#MoTea4#318829#Magnaporthe_oryzae#loss_of_pathogenicity	No definition line	81.6794
MHUMG1_58961	53	0	Q8TFN5#PHI:1055#CgCHSIII#31870#Colletotrichum_graminicola#unaffected_pathogenicity	No definition line	81.6667
MHUMG1_79071	2	5.64294e-166	Q4X132#PHI:2548#KRR1#746128#Aspergillus_fumigatus#lethal	No definition line	81.6254
MHUMG1_103071	8	0	I1RKY2#PHI:1578#GzOB018#5518#Fusarium_graminearum#unaffected_pathogenicity	No definition line	81.5939
MHUMG1_6591	14	0	I1REC4#PHI:6095#FgVps5#5518#Fusarium_graminearum#reduced_virulence	No definition line	81.5412
MHUMG1_60841	57	0	Q8TFN6#PHI:1054#CgCHSI#31870#Colletotrichum_graminicola#unaffected_pathogenicity	No definition line	81.4815
MHUMG1_65281	17	0	O42622#PHI:123__PHI:775__PHI:794__PHI:7227#PTH9_(NTH1)__MGG_09471__nth1#318829#Magnaporthe_oryzae#reduced_virulence	No definition line	81.4259
MHUMG1_102391	12	0	G4N7U4#PHI:6634#MoDnm1#318829#Magnaporthe_oryzae#reduced_virulence	No definition line	81.3268
MHUMG1_20761	4	1.27375e-96	I1RZ39#PHI:1599#GzOB039#5518#Fusarium_graminearum#unaffected_pathogenicity	No definition line	81.2834
MHUMG1_28331	4	0	I1RZY1#PHI:1602#GzOB043#5518#Fusarium_graminearum#unaffected_pathogenicity	No definition line	81.25
MHUMG1_43861	13	0	J4VW09#PHI:4783__PHI:8631#Fkh2__fkh2#176275#Beauveria_bassiana#reduced_virulence	No definition line	81.25
MHUMG1_65091	5	0	Q4HYQ4#PHI:1601#GzOB042#5518#Fusarium_graminearum#unaffected_pathogenicity	No definition line	81.1839
MHUMG1_26881	257	0	I1RRX7#PHI:1183#(Sc_Cmk1/Cmk2)#5518#Fusarium_graminearum#reduced_virulence	No definition line	81.155
MHUMG1_70231	14	0	I1RC32#PHI:2351__PHI:2353#AMT1#5518#Fusarium_graminearum#reduced_virulence	No definition line	81.0959
MHUMG1_85621	254	0	I1RD19#PHI:1251#FGSG_01506#5518#Fusarium_graminearum#unaffected_pathogenicity	No definition line	81.0861
MHUMG1_84891	253	8.83468e-147	I1S5M8#PHI:1258#FGSG_12149#5518#Fusarium_graminearum#unaffected_pathogenicity	No definition line	81.07
MHUMG1_2111	50	0	Q4X0M4#PHI:2527#SEC31#746128#Aspergillus_fumigatus#lethal__loss_of_pathogenicity	No definition line	80.9524
MHUMG1_12611	9	0	G4NB53#PHI:5472#MoDeam#318829#Magnaporthe_oryzae#reduced_virulence	No definition line	80.8989
MHUMG1_32231	3	0	I1RB71#PHI:1630#GzWing002#5518#Fusarium_graminearum#unaffected_pathogenicity	No definition line	80.8399
MHUMG1_27421	7	0	K9Y567#PHI:4506#So_(soft)#35717#Epichloe_festucae#increased_virulence_(hypervirulence)	No definition line	80.8252
MHUMG1_105621	95	5.09305e-55	I1RQ34#PHI:1377#GzC2H040#5518#Fusarium_graminearum#unaffected_pathogenicity	No definition line	80.8219
MHUMG1_58201	257	0	I1S053#PHI:1772#GzZC087#5518#Fusarium_graminearum#reduced_virulence	No definition line	80.7692
MHUMG1_66681	6	0	G2WYZ0#PHI:7329#STT3#27337#Verticillium_dahliae#reduced_virulence	No definition line	80.7588
MHUMG1_35731	4	0	Q2V086#PHI:862#ClaSSD1#5462#Colletotrichum_lagenaria#loss_of_pathogenicity	No definition line	80.6554
MHUMG1_43011	6	0	I1RX47#PHI:1666#GzCCHC006#5518#Fusarium_graminearum#unaffected_pathogenicity	No definition line	80.5804
MHUMG1_71971	17	8.59413e-125	Q86ZB5#PHI:7358#KLP7#40559#Botrytis_cinerea#reduced_virulence	No definition line	80.5556
MHUMG1_53311	7	0	G4MRB4#PHI:4491#SHM#318829#Magnaporthe_oryzae#reduced_virulence	No definition line	80.5447
MHUMG1_94281	273	8.59846e-98	I1R9P3#PHI:1995#GzZC310#5518#Fusarium_graminearum#unaffected_pathogenicity	No definition line	80.4878
MHUMG1_40671	10	0	I1RWA9#PHI:1647#GzWing019#5518#Fusarium_graminearum#reduced_virulence	No definition line	80.4758
MHUMG1_109571	9	0	G4MTG9#PHI:8734#MoLeu1_(MGG_01553)#318829#Magnaporthe_oryzae#loss_of_pathogenicity	No definition line	80.4726
MHUMG1_45391	266	2.69602e-175	I1RRB9#PHI:1229#FGSG_06637#5518#Fusarium_graminearum#lethal	No definition line	80.4598
MHUMG1_99211	257	0	I1RUG2#PHI:1233#FGSG_07855#5518#Fusarium_graminearum#lethal	No definition line	80.4455
MHUMG1_9691	15	0	H6ULV1#PHI:5450#gdh2#474922#Colletotrichum_gloeosporioides#reduced_virulence__unaffected_pathogenicity	No definition line	80.4432
MHUMG1_71711	50	0	J4VXB0#PHI:7150#eca1#176275#Beauveria_bassiana#reduced_virulence	No definition line	80.3657
MHUMG1_85251	19	0	I1RFM6#PHI:744#ADE5#5518#Fusarium_graminearum#reduced_virulence	No definition line	80.3321
MHUMG1_19761	14	0	Q8J1Y3#PHI:409#BbCHIT1#176275#Beauveria_bassiana#increased_virulence_(hypervirulence)	No definition line	80.2899
MHUMG1_56231	16	0	I1RFJ2#PHI:1573#GzOB013#5518#Fusarium_graminearum#lethal	No definition line	80.2534
MHUMG1_33401	7	0	G4MW66#PHI:2062__PHI:3815#Gph1__GPH1#318829#Magnaporthe_oryzae#unaffected_pathogenicity__loss_of_pathogenicity__reduced_virulence	No definition line	80.1792
MHUMG1_10191	7	5.69888e-56	I1RG68#PHI:1544#GzMyb008#5518#Fusarium_graminearum#unaffected_pathogenicity	No definition line	80.1724
MHUMG1_3791	14	0	I1REK5#PHI:733#FBP1#5518#Fusarium_graminearum#reduced_virulence	No definition line	80.1347
MHUMG1_56211	8	0	Q4IEV4#PHI:1637#GzWing009#5518#Fusarium_graminearum#lethal	No definition line	80.0797
MHUMG1_68301	15	0	J5K1X2#PHI:7036#Pmt4#176275#Beauveria_bassiana#increased_virulence_(hypervirulence)__reduced_virulence	No definition line	80.0522
MHUMG1_41171	6	0	Q5J4D6#PHI:365__PHI:2267#MLS1__Mls1#13684#Parastagonospora_nodorum#loss_of_pathogenicity	No definition line	80
MHUMG1_59611	13	0	Q9C1T0#PHI:200#ARG1#5507#Fusarium_oxysporum#reduced_virulence	No definition line	80
MHUMG1_69561	11	0	I1RBX1#PHI:5779#Fgsg01064#5518#Fusarium_graminearum#unaffected_pathogenicity	No definition line	80
MHUMG1_40461	43	4.37365e-177	I1RB11#PHI:1443#GzGATA001#5518#Fusarium_graminearum#unaffected_pathogenicity	No definition line	80
MHUMG1_19041	37	1.08186e-94	I1RC95#PHI:1566#GzOB006#5518#Fusarium_graminearum#lethal	No definition line	80
MHUMG1_4341	33	1.76476e-83	I1RC95#PHI:1566#GzOB006#5518#Fusarium_graminearum#lethal	No definition line	80
MHUMG1_30111	120	3.32803e-74	I1RKP6#PHI:1926#GzZC241#5518#Fusarium_graminearum#unaffected_pathogenicity	No definition line	80
MHUMG1_45401	63	1.48498e-65	Q9C1E9#PHI:226#PEX6#5462#Colletotrichum_lagenaria#loss_of_pathogenicity	No definition line	80
MHUMG1_63901	37	1.4975e-31	G4NES9#PHI:784#MGG_00056#318829#Magnaporthe_oryzae#reduced_virulence	No definition line	80
MHUMG1_58871	108	4.85177e-19	Q4WR83#PHI:2321#SidI#746128#Aspergillus_fumigatus#reduced_virulence	No definition line	80
MHUMG1_93531	120	7.686e-18	G4N853#PHI:5630#FZC35#318829#Magnaporthe_oryzae#unaffected_pathogenicity	No definition line	80
MHUMG1_13911	113	0	I1RYR6#PHI:1692#GzZC007#5518#Fusarium_graminearum#unaffected_pathogenicity	No definition line	79.9618
MHUMG1_67371	15	0	I1RAH1#PHI:4658#FgHXK1#5518#Fusarium_graminearum#reduced_virulence	No definition line	79.9582
MHUMG1_14761	14	0	I1RY25#PHI:1167#NPC1#5518#Fusarium_graminearum#reduced_virulence	No definition line	79.9519
MHUMG1_38011	35	1.27573e-94	I1RJP0#PHI:3833#Fgrho2#5518#Fusarium_graminearum#reduced_virulence	No definition line	79.8817
MHUMG1_54651	20	3.20138e-90	Q86ZF8#PHI:6199#BbCypA#176275#Beauveria_bassiana#unaffected_pathogenicity	No definition line	79.878
MHUMG1_17001	38	0	G4NH84#PHI:8588#Moppe1#318829#Magnaporthe_oryzae#reduced_virulence	No definition line	79.7183
MHUMG1_19681	7	2.08734e-103	G4MRH1#PHI:7112#MoERR1#318829#Magnaporthe_oryzae#reduced_virulence	No definition line	79.6791
MHUMG1_13501	4	0	H9C592#PHI:2590__PHI:2611#CMLE#5507#Fusarium_oxysporum#loss_of_pathogenicity	No definition line	79.6143
MHUMG1_72901	253	0	I1RTC2#PHI:1232#FGSG_07423#5518#Fusarium_graminearum#lethal	No definition line	79.6117
MHUMG1_89391	14	0	I1RE83#PHI:1288__PHI:6300#FGSG_01963__FgPDK1#5518#Fusarium_graminearum#unaffected_pathogenicity__reduced_virulence	No definition line	79.5337
MHUMG1_69901	12	0	I1RC07#PHI:1348#GzC2H008#5518#Fusarium_graminearum#reduced_virulence	No definition line	79.471
MHUMG1_46191	13	0	I1RNL0#PHI:2409#FgMT2#5518#Fusarium_graminearum#reduced_virulence	No definition line	79.4118
MHUMG1_85171	5	1.43634e-116	J5JYY9#PHI:4917#BbbqrA#176275#Beauveria_bassiana#reduced_virulence__increased_virulence_(hypervirulence)__unaffected_pathogenicity	No definition line	79.397
MHUMG1_26141	27	0	I1RS41#PHI:1529#Gzscp#5518#Fusarium_graminearum#reduced_virulence	No definition line	79.3718
MHUMG1_56971	11	1.56383e-122	I1RK33#PHI:1683#GzRad001#5518#Fusarium_graminearum#lethal	No definition line	79.3333
MHUMG1_10251	9	0	J5JEX5#PHI:3097#Kre2/Mnt1#176275#Beauveria_bassiana#reduced_virulence	No definition line	79.3241
MHUMG1_89381	44	0	I1RE80#PHI:3037#FgERG5A#5518#Fusarium_graminearum#reduced_virulence	No definition line	79.3233
MHUMG1_31271	21	0	I1RKC4#PHI:1169__PHI:1172#HDF2#5518#Fusarium_graminearum#reduced_virulence	No definition line	79.2952
MHUMG1_102071	5	0	I1RCH5#PHI:1569#GzOB009#5518#Fusarium_graminearum#lethal	No definition line	79.2553
MHUMG1_25491	11	0	O60038#PHI:1034#Cpcat1#5111#Claviceps_purpurea#unaffected_pathogenicity	No definition line	79.1367
MHUMG1_84861	122	0	G4MUR7#PHI:4475#MoTup1#318829#Magnaporthe_oryzae#loss_of_pathogenicity	No definition line	78.9855
MHUMG1_44011	262	5.81445e-109	G4N7H6#PHI:5631#FZC36#318829#Magnaporthe_oryzae#unaffected_pathogenicity	No definition line	78.9474
MHUMG1_58061	16	1.53941e-90	Q525E4#PHI:2073__PHI:2091#Moatg5__MgATG5#318829#Magnaporthe_oryzae#loss_of_pathogenicity	No definition line	78.9474
MHUMG1_92451	13	2.62287e-101	G4N178#PHI:2153__PHI:2356#MoHyr1__MoHYR1#318829#Magnaporthe_oryzae#reduced_virulence	No definition line	78.9157
MHUMG1_47381	255	0	I1RDY4#PHI:1869#GzZC184#5518#Fusarium_graminearum#unaffected_pathogenicity	No definition line	78.7346
MHUMG1_40221	11	0	I1RB37#PHI:6119#BTA1#5518#Fusarium_graminearum#reduced_virulence	No definition line	78.6982
MHUMG1_32931	5	6.00477e-135	I1R9W2#PHI:1561#GzOB001#5518#Fusarium_graminearum#unaffected_pathogenicity	No definition line	78.6822
MHUMG1_37701	13	0	G4MYY5#PHI:7993#PoVrl1_(MGG_10958)__PoVrl1#318829#Magnaporthe_oryzae#unaffected_pathogenicity	No definition line	78.5714
MHUMG1_81411	43	0	Q5AG40#PHI:2553#VPS4#5476#Candida_albicans#loss_of_pathogenicity	No definition line	78.5714
MHUMG1_102101	238	0	I1RCH8#PHI:1921#GzZC236#5518#Fusarium_graminearum#reduced_virulence	No definition line	78.5714
MHUMG1_4271	32	1.07214e-162	Q5AG40#PHI:2553#VPS4#5476#Candida_albicans#loss_of_pathogenicity	No definition line	78.5714
MHUMG1_67861	31	8.06267e-94	I1RC95#PHI:1566#GzOB006#5518#Fusarium_graminearum#lethal	No definition line	78.5714
MHUMG1_42701	3	3.64526e-51	G5EI55#PHI:2154#RBP35#318829#Magnaporthe_oryzae#reduced_virulence	No definition line	78.5714
MHUMG1_67391	7	0	I1RAH2#PHI:1629#GzWing001#5518#Fusarium_graminearum#unaffected_pathogenicity	No definition line	78.5185
MHUMG1_28671	8	1.84746e-89	G4ND54#PHI:8041__PHI:8048#Moubc9__Ubc9#318829#Magnaporthe_oryzae#reduced_virulence	No definition line	78.4091
MHUMG1_21541	87	0	Q86ZP4#PHI:304#GzCPS1#5518#Fusarium_graminearum#reduced_virulence	No definition line	78.4005
MHUMG1_89751	19	6.01512e-84	G4N572#PHI:5047__PHI:6635#MoFis1#318829#Magnaporthe_oryzae#reduced_virulence	No definition line	78.3784
MHUMG1_37961	9	0	G2XJR0#PHI:8670#ACC_deaminase_(VDAG_10392)#27337#Verticillium_dahliae#reduced_virulence__increased_virulence_(hypervirulence)	No definition line	78.1977
MHUMG1_34091	8	0	I1RZG7#PHI:1551#GzMyb015#5518#Fusarium_graminearum#unaffected_pathogenicity	No definition line	78.133
MHUMG1_72221	9	0	J5K093#PHI:3096#Ktr4#176275#Beauveria_bassiana#reduced_virulence	No definition line	78.117
MHUMG1_89731	7	0	Q4WUA3#PHI:2532#HEM15#746128#Aspergillus_fumigatus#lethal	No definition line	78.0899
MHUMG1_79501	3	4.22387e-142	I1RMR7#PHI:8911#FgVPS36_(FGSG_05263)#5518#Fusarium_graminearum#reduced_virulence	No definition line	78.0669
MHUMG1_77901	19	0	P0CT09#PHI:7223#Moend3#318829#Magnaporthe_oryzae#reduced_virulence	No definition line	77.9747
MHUMG1_59821	7	0	J5JFS1#PHI:9046#BbATG7_(BBA_08545)#176275#Beauveria_bassiana#reduced_virulence	No definition line	77.9562
MHUMG1_78801	9	0	Q4WGR1#PHI:2541#OLE1#746128#Aspergillus_fumigatus#lethal	No definition line	77.951
MHUMG1_9521	10	1.07438e-143	I1RJT8#PHI:8909#FgVPS22_(FGSG_04120)#5518#Fusarium_graminearum#reduced_virulence	No definition line	77.8626
MHUMG1_58911	5	0	I1S0A1#PHI:1603#GzOB044#5518#Fusarium_graminearum#unaffected_pathogenicity	No definition line	77.8189
MHUMG1_72361	255	0	Q4I5U9#PHI:1231__PHI:1492#FGSG_07409__GzHMG024#5518#Fusarium_graminearum#lethal__unaffected_pathogenicity	No definition line	77.8013
MHUMG1_44811	36	3.01304e-130	D4I229#PHI:7094__PHI:7438#clpV-2__EAMY__3222#552#Erwinia_amylovora#reduced_virulence__unaffected_pathogenicity__increased_virulence_(hypervirulence)	No definition line	77.7778
MHUMG1_30761	30	0	I1S5Z3#PHI:1685#GzRad003#5518#Fusarium_graminearum#unaffected_pathogenicity	No definition line	77.6786
MHUMG1_22021	4	0	I1RR00#PHI:1228#FGSG_06502#5518#Fusarium_graminearum#lethal	No definition line	77.6577
MHUMG1_89411	70	0	Q8TFN4#PHI:1056#CgCHSV#31870#Colletotrichum_graminicola#reduced_virulence	No definition line	77.5761
MHUMG1_27121	15	0	Q4I7F9#PHI:1458#GzAra006#5518#Fusarium_graminearum#unaffected_pathogenicity	No definition line	77.5204
MHUMG1_41221	5	2.59188e-153	Q5A5Q8#PHI:6076#RPS41#5476#Candida_albicans#reduced_virulence	No definition line	77.5194
MHUMG1_56961	31	0	I1RK32#PHI:1293__PHI:3853#GzAPSES001__FgSWI6#5518#Fusarium_graminearum#reduced_virulence	No definition line	77.4559
MHUMG1_37871	16	0	G4MMK2#PHI:3975#MoIlv2#318829#Magnaporthe_oryzae#loss_of_pathogenicity	No definition line	77.2793
MHUMG1_55811	9	0	I1SAP7#PHI:1624#GzJUM006#5518#Fusarium_graminearum#unaffected_pathogenicity	No definition line	77.2727
MHUMG1_20771	8	0	G4NFW7#PHI:8928#MoSCAD2_(MGG_08690)#318829#Magnaporthe_oryzae#loss_of_pathogenicity	No definition line	77.2321
MHUMG1_43721	10	9.50935e-131	W7MQF2#PHI:3054#FvHAP5#117187#Fusarium_verticillioides#reduced_virulence	No definition line	77.1186
MHUMG1_67281	4	0	G4MTZ0#PHI:2114#Calnexin#318829#Magnaporthe_oryzae#loss_of_pathogenicity	No definition line	77.0677
MHUMG1_16371	293	0	I1RBN6#PHI:1799#GzZC114#5518#Fusarium_graminearum#unaffected_pathogenicity	No definition line	77.0631
MHUMG1_46241	27	0	Q9C1E9#PHI:226#PEX6#5462#Colletotrichum_lagenaria#loss_of_pathogenicity	No definition line	77.0508
MHUMG1_25661	24	2.5347e-114	J4KR13#PHI:5055#vosA#176275#Beauveria_bassiana#reduced_virulence	No definition line	77.0408
MHUMG1_21241	4	0	I1RRG0#PHI:1078#Mes1#5518#Fusarium_graminearum#reduced_virulence	No definition line	77.0341
MHUMG1_39641	274	0	D5LHI2#PHI:8857#slnCl1_(GU907087)#290576#Colletotrichum_lindemuthianum#reduced_virulence	No definition line	76.9231
MHUMG1_53431	12	0	I1RZL3#PHI:3996#FgFim#5518#Fusarium_graminearum#reduced_virulence	No definition line	76.9231
MHUMG1_86001	170	0	I1RFP7#PHI:1935#GzZC250#5518#Fusarium_graminearum#unaffected_pathogenicity	No definition line	76.9231
MHUMG1_4991	301	2.94632e-127	I1S6X4#PHI:1735#GzZC050#5518#Fusarium_graminearum#unaffected_pathogenicity	No definition line	76.9231
MHUMG1_15671	3	2.9741e-45	G4N5N3#PHI:5019#MoPEX11C#318829#Magnaporthe_oryzae#unaffected_pathogenicity__reduced_virulence	No definition line	76.9231
MHUMG1_49941	24	2.72926e-34	G2XD68#PHI:8858#VdSSEP1_(VDAG-08100)#27337#Verticillium_dahliae#reduced_virulence	No definition line	76.9231
MHUMG1_63621	28	2.95848e-28	G4N4N6#PHI:4616#MoSFA1#318829#Magnaporthe_oryzae#reduced_virulence	No definition line	76.9231
MHUMG1_103741	17	3.40792e-25	B1GVX4#PHI:2289#BcBOA2#40559#Botrytis_cinerea#reduced_virulence	No definition line	76.9231
MHUMG1_104101	11	2.47334e-13	P0AA28#PHI:2644#thioredoxin_1#28901#Salmonella_enterica#reduced_virulence	No definition line	76.9231
MHUMG1_54341	37	7.53367e-13	Q3Y5V5#PHI:1018__PHI:2042#ABC3#318829#Magnaporthe_oryzae#loss_of_pathogenicity	No definition line	76.9231
MHUMG1_44051	257	0	I1RN43#PHI:1268#FGSG_05406#5518#Fusarium_graminearum#unaffected_pathogenicity	No definition line	76.8737
MHUMG1_77981	165	0	J9MZK9#PHI:2455#CRE1#5507#Fusarium_oxysporum#unaffected_pathogenicity	No definition line	76.8322
MHUMG1_27501	259	0	I1RSK0#PHI:1257#FGSG_07121#5518#Fusarium_graminearum#unaffected_pathogenicity	No definition line	76.8311
MHUMG1_16441	11	0	G4MTN1#PHI:6348__PHI:8233#MoPmt2__MoPmt2_(MGG_07190)#318829#Magnaporthe_oryzae#reduced_virulence	No definition line	76.7905
MHUMG1_7571	38	2.07595e-143	J5K8H0#PHI:4990#ras3#176275#Beauveria_bassiana#reduced_virulence	No definition line	76.7528
MHUMG1_9641	18	1.71715e-160	I1RJV1#PHI:1366#GzCON7#5518#Fusarium_graminearum#reduced_virulence	No definition line	76.7196
MHUMG1_26251	256	0	I1RS32#PHI:1180#(Sc_Sat4)#5518#Fusarium_graminearum#reduced_virulence	No definition line	76.7152
MHUMG1_9831	18	0	I1RJR9#PHI:3375#FgSte50#5518#Fusarium_graminearum#loss_of_pathogenicity	No definition line	76.7123
MHUMG1_33231	15	7.9996e-50	I1RB45#PHI:1301#GzbHLH002#5518#Fusarium_graminearum#unaffected_pathogenicity	No definition line	76.699
MHUMG1_72991	16	0	I1RTD1#PHI:1645#GzWing017#5518#Fusarium_graminearum#unaffected_pathogenicity	No definition line	76.6432
MHUMG1_67111	257	0	I1RAE5#PHI:1208__PHI:3131#(Sc_Sch9)__FgSCH9#5518#Fusarium_graminearum#reduced_virulence	No definition line	76.5957
MHUMG1_6781	18	0	I1S2F2#PHI:1500#GzHMG032#5518#Fusarium_graminearum#unaffected_pathogenicity	No definition line	76.5941
MHUMG1_67151	122	1.98247e-178	I1RAF0#PHI:1343#GzC2H003#5518#Fusarium_graminearum#reduced_virulence	No definition line	76.5625
MHUMG1_4461	10	0	Q58Z64#PHI:423#VAD1#5207#Cryptococcus_neoformans#reduced_virulence	No definition line	76.5586
MHUMG1_7221	42	0	G2XIG8#PHI:7173#HiC-15#27337#Verticillium_dahliae#reduced_virulence	No definition line	76.506
MHUMG1_107571	91	0	W7MT31#PHI:3387#FVEG_12523#117187#Fusarium_verticillioides#unaffected_pathogenicity	No definition line	76.4706
MHUMG1_67531	250	1.53082e-15	I1RGU2#PHI:1899#GzZC214#5518#Fusarium_graminearum#unaffected_pathogenicity	No definition line	76.4706
MHUMG1_62931	106	1.7217e-08	E3QPY3#PHI:4217#NPS6#31870#Colletotrichum_graminicola#reduced_virulence	No definition line	76.4706
MHUMG1_105361	3	9.03689e-103	I1S8E2#PHI:1606#GzOB047#5518#Fusarium_graminearum#reduced_virulence	No definition line	76.4423
MHUMG1_9271	7	0	Q4WLT4#PHI:2533#FKS1#746128#Aspergillus_fumigatus#lethal	No definition line	76.3566
MHUMG1_33521	85	0	G4MZY1#PHI:2034#MFP1#318829#Magnaporthe_oryzae#reduced_virulence	No definition line	76.3012
MHUMG1_55511	9	4.01623e-54	B0XTA5#PHI:2293#cycA#746128#Aspergillus_fumigatus#reduced_virulence	No definition line	76.2887
MHUMG1_14381	259	0	I1RY42#PHI:1207__PHI:3178#(Sc_Kin1/Kin2)__FgKin1#5518#Fusarium_graminearum#reduced_virulence	No definition line	76.2712
MHUMG1_32671	263	9.5022e-157	I1RJB0#PHI:1880#GzZC195#5518#Fusarium_graminearum#unaffected_pathogenicity	No definition line	76.1905
MHUMG1_70801	6	0	W7LZA5#PHI:3886#UBL1#117187#Fusarium_verticillioides#reduced_virulence	No definition line	76.1472
MHUMG1_77371	59	0	G4MSX7#PHI:772__PHI:797#MGG_01481#318829#Magnaporthe_oryzae#loss_of_pathogenicity__reduced_virulence	No definition line	76.1364
MHUMG1_20361	8	0	A0A0D2XWJ8#PHI:4727#gdb1#5507#Fusarium_oxysporum#reduced_virulence__unaffected_pathogenicity	No definition line	76.1051
MHUMG1_65571	294	9.81047e-169	I1RSG1#PHI:1916#GzZC231#5518#Fusarium_graminearum#unaffected_pathogenicity	No definition line	76.0563
MHUMG1_67071	253	0	I1RAE2#PHI:1241#FGSG_00469#5518#Fusarium_graminearum#unaffected_pathogenicity	No definition line	76.0246
MHUMG1_82401	9	0	G4NJL1#PHI:2027#TGL1-1#318829#Magnaporthe_oryzae#unaffected_pathogenicity	No definition line	76
MHUMG1_69231	258	6.10057e-79	I1RBU9#PHI:1557#GzNH002#5518#Fusarium_graminearum#unaffected_pathogenicity	No definition line	76
MHUMG1_46391	3	3.60999e-154	O42772#PHI:822#Ip#1047171#Zymoseptoria_tritici#chemistry_target:_resistance_to_chemical	No definition line	75.8621
MHUMG1_31681	7	0	O42620#PHI:120__PHI:594#PTH2__CrAT1_(PTH2)#318829#Magnaporthe_oryzae#loss_of_pathogenicity	No definition line	75.8333
MHUMG1_65061	14	0	I1RZQ6#PHI:7267#PKR#5518#Fusarium_graminearum#reduced_virulence	No definition line	75.8186
MHUMG1_20821	2	3.84534e-64	I1RZ35#PHI:1598#GzOB038#5518#Fusarium_graminearum#reduced_virulence	No definition line	75.7353
MHUMG1_78521	16	0	J5JMB3#PHI:6746#Mdj1#176275#Beauveria_bassiana#reduced_virulence	No definition line	75.7339
MHUMG1_31941	4	0	I1RXX1#PHI:1006#HMR1#5518#Fusarium_graminearum#reduced_virulence	No definition line	75.724
MHUMG1_27291	346	0	I1RRU2#PHI:1248#FGSG_06832#5518#Fusarium_graminearum#unaffected_pathogenicity	No definition line	75.7212
MHUMG1_25581	10	0	J4WK53#PHI:8672#phr2_(EJP70165)#176275#Beauveria_bassiana#unaffected_pathogenicity	No definition line	75.6654
MHUMG1_13831	49	0	J4KMX0#PHI:7152#pmcB#176275#Beauveria_bassiana#reduced_virulence	No definition line	75.6535
MHUMG1_78121	5	2.9664e-167	I1RM32#PHI:9048#FgSpo7_(FGSG_05009)#5518#Fusarium_graminearum#reduced_virulence	No definition line	75.6329
MHUMG1_109081	17	0	J5JB66#PHI:7035#Pmt1#176275#Beauveria_bassiana#reduced_virulence	No definition line	75.6098
MHUMG1_90521	10	0	G4MV96#PHI:3823#MET13#318829#Magnaporthe_oryzae#loss_of_pathogenicity	No definition line	75.5481
MHUMG1_9711	6	1.41987e-81	I1RJT0#PHI:8913#FgVPS2_(FGSG_04112)#5518#Fusarium_graminearum#lethal	No definition line	75.4386
MHUMG1_5261	5	3.42237e-121	G4NIU3#PHI:789#MGG_04116#318829#Magnaporthe_oryzae#reduced_virulence	No definition line	75.3846
MHUMG1_88291	25	5.89455e-61	A0SXQ6#PHI:1061#MgRho3#318829#Magnaporthe_oryzae#loss_of_pathogenicity	No definition line	75.3731
MHUMG1_26431	9	8.52893e-80	G4N3J5#PHI:5306#MoSKP1#318829#Magnaporthe_oryzae#loss_of_pathogenicity	No definition line	75.3425
MHUMG1_49801	75	1.70796e-153	I1RGE1#PHI:4042#spt8#5518#Fusarium_graminearum#reduced_virulence	No definition line	75.3205
MHUMG1_82361	26	0	I1RWP1#PHI:1648__PHI:6246#GzWing020__Famyo2#5518#Fusarium_graminearum#reduced_virulence	No definition line	75.3122
MHUMG1_65781	5	0	I1RSE4#PHI:1096#FGSG_07062#5518#Fusarium_graminearum#unaffected_pathogenicity	No definition line	75.3086
MHUMG1_83511	10	4.71245e-80	I1S4N1#PHI:1427#GzC2H095#5518#Fusarium_graminearum#unaffected_pathogenicity	No definition line	75.2475
MHUMG1_83641	9	0	Q0V515#PHI:3914#Sdh1#13684#Parastagonospora_nodorum#reduced_virulence	No definition line	75.2033
MHUMG1_6251	4	0	Q4X099#PHI:2638#Ilv3A#746128#Aspergillus_fumigatus#reduced_virulence	No definition line	75.1323
MHUMG1_89831	254	0	I1RMV6#PHI:1222#FGSG_05306#5518#Fusarium_graminearum#lethal	No definition line	75.0983
MHUMG1_44651	17	0	F8U971#PHI:6157#bcdh#40559#Botrytis_cinerea#unaffected_pathogenicity	No definition line	75.0678
MHUMG1_2411	5	0	I1RA07#PHI:1538__PHI:4209__PHI:4236#GzMyb002__MYT3#5518#Fusarium_graminearum#reduced_virulence	No definition line	75
MHUMG1_9531	13	0	J4UPL6#PHI:5394#mas5#176275#Beauveria_bassiana#loss_of_pathogenicity	No definition line	75
MHUMG1_72071	194	0	I1RSL0#PHI:1915#GzZC230#5518#Fusarium_graminearum#reduced_virulence	No definition line	75
MHUMG1_85571	67	0	Q8J286#PHI:244#CLAP1#290576#Colletotrichum_lindemuthianum#loss_of_pathogenicity	No definition line	75
MHUMG1_89541	8	0	I1RE94#PHI:1572#GzOB012#5518#Fusarium_graminearum#unaffected_pathogenicity	No definition line	75
MHUMG1_431	95	2.27354e-176	Q4WR83#PHI:2321#SidI#746128#Aspergillus_fumigatus#reduced_virulence	No definition line	75
MHUMG1_49771	86	1.42819e-154	I1RGE3#PHI:1360#GzC2H020#5518#Fusarium_graminearum#unaffected_pathogenicity	No definition line	75
MHUMG1_58141	4	1.98643e-141	I1S047#PHI:7673#FgLetm2#5518#Fusarium_graminearum#unaffected_pathogenicity__reduced_virulence	No definition line	75
MHUMG1_38391	8	8.15192e-131	G2X5W3#PHI:8559#SOM1_(VDAG_JR2_Chr1g09120a)#27337#Verticillium_dahliae#loss_of_pathogenicity__reduced_virulence	No definition line	75
MHUMG1_26931	3	1.69553e-80	I1RRW0#PHI:8743#FgPEX4_(FGSG_06857)#5518#Fusarium_graminearum#reduced_virulence	No definition line	75
MHUMG1_86111	8	4.80807e-54	I1R9C7#PHI:8667#FgKP4L-2_(FGSG_00061)#5518__4922#Fusarium_graminearum__Komagataella_pastoris#reduced_virulence__increased_virulence_(hypervirulence)	No definition line	75
MHUMG1_96351	100	3.34316e-53	G4N897#PHI:5599#FZC10#318829#Magnaporthe_oryzae#unaffected_pathogenicity	No definition line	75
MHUMG1_16901	22	2.53105e-52	W7N2B4#PHI:3381#FVEG_12533#117187#Fusarium_verticillioides#unaffected_pathogenicity	No definition line	75
MHUMG1_3341	5	1.17049e-50	Q2LK92#PHI:548__PHI:2305#BcPIC5__BcFKBP12#40559#Botrytis_cinerea#reduced_virulence__unaffected_pathogenicity__increased_virulence_(hypervirulence)	No definition line	75
MHUMG1_3221	45	3.1088e-18	I1RUC7#PHI:1260#FGSG_07816#5518#Fusarium_graminearum#unaffected_pathogenicity	No definition line	75
MHUMG1_26841	103	9.94282e-18	Q6FV98#PHI:6626#CgTpo1_2#5478#Candida_glabrata#reduced_virulence	No definition line	75
MHUMG1_76241	28	7.39314e-10	I1RIC0#PHI:1947#GzZC262#5518#Fusarium_graminearum#unaffected_pathogenicity	No definition line	75
MHUMG1_37151	160	3.36309e-09	I1RP37#PHI:1913#GzZC228#5518#Fusarium_graminearum#unaffected_pathogenicity	No definition line	75
MHUMG1_4191	78	9.76941e-08	A5F6S0#PHI:4108#fadD#666#Vibrio_cholerae#reduced_virulence__unaffected_pathogenicity	No definition line	75
MHUMG1_13351	15	4.28843e-06	F9XQ63#PHI:8597#ZtPks8#1047171#Zymoseptoria_tritici#unaffected_pathogenicity	No definition line	75
MHUMG1_44021	17	0	I1ZIP0#PHI:6208#BbCyp8#176275#Beauveria_bassiana#unaffected_pathogenicity	No definition line	74.9153
MHUMG1_102931	32	1.36795e-137	G4N1P8#PHI:5440#ABA4#318829#Magnaporthe_oryzae#reduced_virulence	No definition line	74.9004
MHUMG1_56731	214	0	I1RK16#PHI:1833#GzZC148#5518#Fusarium_graminearum#unaffected_pathogenicity	No definition line	74.8784
MHUMG1_57561	5	6.57167e-77	J4WFU2#PHI:4107#BbMBF1#176275#Beauveria_bassiana#reduced_virulence	No definition line	74.8344
MHUMG1_32241	19	0	Q9C1C6#PHI:216#HDC1#5017#Bipolaris_zeicola#reduced_virulence	No definition line	74.8011
MHUMG1_59801	254	0	I1S0J9#PHI:1185#(Sc_Swe1)#5518#Fusarium_graminearum#reduced_virulence	No definition line	74.6102
MHUMG1_103241	6	0	I1RXD6#PHI:1535#GzMADS002#5518#Fusarium_graminearum#unaffected_pathogenicity	No definition line	74.5995
MHUMG1_93941	59	0	G4MXG4#PHI:2095#Calcium-transporting_ATPase_3#318829#Magnaporthe_oryzae#reduced_virulence	No definition line	74.4519
MHUMG1_59291	12	1.38355e-76	I1S074#PHI:8915#FgVPS32_(FGSG_10092)#5518#Fusarium_graminearum#lethal	No definition line	74.4395
MHUMG1_70551	27	0	I1RC71#PHI:2714#PEX5#5518#Fusarium_graminearum#reduced_virulence	No definition line	74.3902
MHUMG1_78601	4	2.47165e-153	A0A0E0SEE4#PHI:6259#DOHH#5518#Fusarium_graminearum#reduced_virulence__unaffected_pathogenicity	No definition line	74.3827
MHUMG1_100281	260	0	I1RUM5#PHI:1807#GzZC122#5518#Fusarium_graminearum#lethal	No definition line	74.359
MHUMG1_12041	255	6.43602e-180	I1RW16#PHI:1178__PHI:4941#(Sc_Cdc28)__cdc2A#5518#Fusarium_graminearum#reduced_virulence__lethal__loss_of_pathogenicity	No definition line	74.3284
MHUMG1_37341	30	8.36974e-116	I1RCN9#PHI:2427#FgVELB#5518#Fusarium_graminearum#reduced_virulence	No definition line	74.2647
MHUMG1_12911	256	0	I1RWG2#PHI:1242#FGSG_08631#5518#Fusarium_graminearum#unaffected_pathogenicity	No definition line	74.2459
MHUMG1_18981	85	0	I1RDG9#PHI:1628#FgFSR1#5518#Fusarium_graminearum#reduced_virulence	No definition line	74.2018
MHUMG1_41911	21	7.38005e-114	G4NKL4#PHI:3063#MoRga3#318829#Magnaporthe_oryzae#unaffected_pathogenicity	No definition line	74.0196
MHUMG1_62381	258	0	I1RKR8#PHI:1175__PHI:6148#(Sc_Srb10)__FgSsn3#5518#Fusarium_graminearum#reduced_virulence	No definition line	74.0088
MHUMG1_94171	21	0	I1RXF3#PHI:1511#GzHOME009#5518#Fusarium_graminearum#reduced_virulence	No definition line	73.9968
MHUMG1_34361	2	3.81886e-115	G4N008#PHI:5395#MoSec62#318829#Magnaporthe_oryzae#reduced_virulence	No definition line	73.9274
MHUMG1_107921	13	7.85327e-104	I1R9N5#PHI:3910#FgSAT#5518#Fusarium_graminearum#unaffected_pathogenicity	No definition line	73.913
MHUMG1_80831	4	0	G4MNG8#PHI:807#MGG_06951#318829#Magnaporthe_oryzae#reduced_virulence	No definition line	73.8562
MHUMG1_25921	3	2.46507e-88	I1RS54#PHI:1518#GzHOMEL016#5518#Fusarium_graminearum#unaffected_pathogenicity	No definition line	73.7805
MHUMG1_6141	6	0	I1RPM7#PHI:1376#GzC2H039#5518#Fusarium_graminearum#unaffected_pathogenicity	No definition line	73.774
MHUMG1_78181	276	0	I1RM85#PHI:1959#GzZC274#5518#Fusarium_graminearum#unaffected_pathogenicity	No definition line	73.7226
MHUMG1_18291	3	0	G4MTK2#PHI:5232#MoARG1#318829#Magnaporthe_oryzae#loss_of_pathogenicity	No definition line	73.6842
MHUMG1_58691	8	3.42771e-127	Q8J0I5#PHI:344#CPTF1#5111#Claviceps_purpurea#reduced_virulence	No definition line	73.6842
MHUMG1_49811	12	3.4236e-46	I1RF25#PHI:1657#GzCCCH001#5518#Fusarium_graminearum#unaffected_pathogenicity	No definition line	73.6842
MHUMG1_13861	5	3.69189e-35	G4MRZ9#PHI:2181#MoDUO1#318829#Magnaporthe_oryzae#reduced_virulence	No definition line	73.6842
MHUMG1_66221	116	1.58451e-12	G4N4R4#PHI:5676#FZC73#318829#Magnaporthe_oryzae#unaffected_pathogenicity	No definition line	73.6842
MHUMG1_55921	7	0	Q4HWE2#PHI:1671#GzCCHC011#5518#Fusarium_graminearum#reduced_virulence	No definition line	73.6777
MHUMG1_61271	6	4.33879e-109	I1S0X7#PHI:1419#GzC2H086#5518#Fusarium_graminearum#unaffected_pathogenicity	No definition line	73.6677
MHUMG1_90601	33	2.8854e-134	I1RYV4#PHI:1449#GzGATA007#5518#Fusarium_graminearum#unaffected_pathogenicity	No definition line	73.5849
MHUMG1_67351	5	4.96829e-145	J5JBK6#PHI:7058#PilB#176275#Beauveria_bassiana#reduced_virulence	No definition line	73.5395
MHUMG1_36971	254	0	I1RYF8#PHI:1236#FGSG_09408#5518#Fusarium_graminearum#lethal	No definition line	73.5334
MHUMG1_31691	5	0	I1RE51#PHI:1542#GzMyb006#5518#Fusarium_graminearum#unaffected_pathogenicity	No definition line	73.503
MHUMG1_3781	7	0	H8ZZ79#PHI:2710#mepB#474922#Colletotrichum_gloeosporioides#reduced_virulence	No definition line	73.4694
MHUMG1_65891	8	3.03674e-110	I1RA31#PHI:1461#GzCCAAT001#5518#Fusarium_graminearum#unaffected_pathogenicity	No definition line	73.4513
MHUMG1_90591	84	0	I1RYV5#PHI:1514#GzHOME012#5518#Fusarium_graminearum#unaffected_pathogenicity	No definition line	73.3333
MHUMG1_77861	34	1.32052e-158	A0A0U5BRC2#PHI:7866#Lon#346#Xanthomonas_citri#increased_virulence_(hypervirulence)__reduced_virulence__unaffected_pathogenicity	No definition line	73.3333
MHUMG1_108101	8	7.65579e-83	W7LS89#PHI:6262#FUG1#117187#Fusarium_verticillioides#reduced_virulence	No definition line	73.3333
MHUMG1_87361	182	1.99067e-30	I1RDY4#PHI:1869#GzZC184#5518#Fusarium_graminearum#unaffected_pathogenicity	No definition line	73.3333
MHUMG1_98091	48	9.47043e-30	G2XIG8#PHI:7173#HiC-15#27337#Verticillium_dahliae#reduced_virulence	No definition line	73.3333
MHUMG1_5141	22	1.04086e-06	J4KL74#PHI:7381#Blys8#176275#Beauveria_bassiana#unaffected_pathogenicity	No definition line	73.3333
MHUMG1_26131	11	0	I1RS43#PHI:1585#GzOB025#5518#Fusarium_graminearum#unaffected_pathogenicity	No definition line	73.2984
MHUMG1_33621	6	3.35356e-105	I1RZ11#PHI:1411#GzC2H078#5518#Fusarium_graminearum#lethal	No definition line	73.1092
MHUMG1_27071	4	0	I1RRX4#PHI:1291#TOP1#5518#Fusarium_graminearum#reduced_virulence	No definition line	73.0727
MHUMG1_70031	3	6.28973e-158	I1RC15#PHI:1633#GzWing005#5518#Fusarium_graminearum#unaffected_pathogenicity	No definition line	73.0435
MHUMG1_69391	2	0	J4KQD8#PHI:6875#BbVmaH#176275#Beauveria_bassiana#reduced_virulence	No definition line	73.0126
MHUMG1_35371	262	0	I1RT48#PHI:1216#FGSG_07344#5518#Fusarium_graminearum#reduced_virulence	No definition line	73.0061
MHUMG1_32711	1	0	G4MU34#PHI:3257#MoIlv1#318829#Magnaporthe_oryzae#reduced_virulence	No definition line	72.9779
MHUMG1_41351	8	0	Q1HA66#PHI:6969#cokel2#5465#Colletotrichum_orbiculare#reduced_virulence	No definition line	72.8778
MHUMG1_66201	8	0	I1RU06#PHI:6124__PHI:5750#FGSG_07678__ScOrtholog_GIC1#5518#Fusarium_graminearum#reduced_virulence	No definition line	72.8643
MHUMG1_59701	15	5.91874e-178	Q4WTH5#PHI:4471#PtcB#746128#Aspergillus_fumigatus#loss_of_pathogenicity	No definition line	72.8097
MHUMG1_22901	3	2.81662e-104	I1RRB0#PHI:7124#FgEB1#5518#Fusarium_graminearum#reduced_virulence	No definition line	72.7679
MHUMG1_61381	254	0	I1S0Y9#PHI:1186#(Sc_Cdc15)#5518#Fusarium_graminearum#reduced_virulence	No definition line	72.7582
MHUMG1_39331	52	1.54364e-107	J4KL74#PHI:7381#Blys8#176275#Beauveria_bassiana#unaffected_pathogenicity	No definition line	72.7273
MHUMG1_36241	5	5.17526e-51	G4MQZ2#PHI:2038#Mir1#318829#Magnaporthe_oryzae#unaffected_pathogenicity	No definition line	72.6496
MHUMG1_77111	17	1.97806e-117	G4MT58#PHI:5480#MoPyr5#318829#Magnaporthe_oryzae#reduced_virulence	No definition line	72.6457
MHUMG1_48621	6	4.87557e-165	Q4WCZ1#PHI:2969#argEF#746128#Aspergillus_fumigatus#reduced_virulence	No definition line	72.561
MHUMG1_41811	10	1.16659e-143	I1RWH5#PHI:1589#GzOB029#5518#Fusarium_graminearum#unaffected_pathogenicity	No definition line	72.4907
MHUMG1_43321	86	0	I1RE06#PHI:1356#GzC2H016#5518#Fusarium_graminearum#unaffected_pathogenicity	No definition line	72.4731
MHUMG1_76271	14	8.127e-83	W7M2E5#PHI:3356#Mads2#117187#Fusarium_verticillioides#unaffected_pathogenicity	No definition line	72.4719
MHUMG1_16481	6	0	W7MS09#PHI:3385#FVEG_12529#117187#Fusarium_verticillioides#unaffected_pathogenicity	No definition line	72.3653
MHUMG1_54721	9	0	I1S1X8#PHI:2355#AMT4#5518#Fusarium_graminearum#reduced_virulence	No definition line	72.3214
MHUMG1_47051	270	1.25737e-115	I1REQ5#PHI:1711#GzZC026#5518#Fusarium_graminearum#unaffected_pathogenicity	No definition line	72.2727
MHUMG1_22751	47	0	Q4I8B6#PHI:1675#GzDHHC003#5518#Fusarium_graminearum#unaffected_pathogenicity	No definition line	72.2689
MHUMG1_69241	9	0	I1RC64#PHI:1554#GzMyb018#5518#Fusarium_graminearum#unaffected_pathogenicity	No definition line	72.2628
MHUMG1_42411	6	0	I1RX04#PHI:1406#GzC2H070#5518#Fusarium_graminearum#lethal	No definition line	72.2581
MHUMG1_40601	255	0	I1RWQ0#PHI:1240__PHI:3088#FGSG_08729__CPK2#5518#Fusarium_graminearum#unaffected_pathogenicity__loss_of_pathogenicity	No definition line	72.25
MHUMG1_52731	3	2.14762e-145	A0A0E0S648#PHI:5780#Fgsg04051#5518#Fusarium_graminearum#unaffected_pathogenicity	No definition line	72.2408
MHUMG1_11571	289	0	I1RVT7#PHI:1790#GzZC105#5518#Fusarium_graminearum#lethal	No definition line	72.2222
MHUMG1_14271	25	6.49195e-94	I1RY51#PHI:1333#GzbZIP015#5518#Fusarium_graminearum#unaffected_pathogenicity	No definition line	72.2222
MHUMG1_44771	17	4.55471e-91	I1RNA7#PHI:1507#GzHOME002#5518#Fusarium_graminearum#unaffected_pathogenicity	No definition line	72.2222
MHUMG1_57211	6	8.54314e-47	C0NFK7#PHI:6265#Eng1#5037#Histoplasma_capsulatum#reduced_virulence	No definition line	72.2222
MHUMG1_81981	23	2.39946e-31	G2X8Y4#PHI:7741#FreB#27337#Verticillium_dahliae#reduced_virulence	No definition line	72.2222
MHUMG1_84851	9	0	I1RFM2#PHI:3035#FgERG3A#5518#Fusarium_graminearum#reduced_virulence	No definition line	72.2063
MHUMG1_83041	7	6.09011e-117	W7LTJ2#PHI:7146#FvHEX1#117187#Fusarium_verticillioides#unaffected_pathogenicity	No definition line	72.1591
MHUMG1_44781	11	0	I1RNA9#PHI:1508#GzHOME003#5518#Fusarium_graminearum#unaffected_pathogenicity	No definition line	72.155
MHUMG1_90841	254	0	I1RP88#PHI:1226#FGSG_05845#5518#Fusarium_graminearum#lethal	No definition line	72.1154
MHUMG1_26001	255	1.43137e-135	I1RFC7#PHI:1239#FGSG_02399#5518#Fusarium_graminearum#unaffected_pathogenicity	No definition line	72.1116
MHUMG1_36051	257	0	I1RRQ8#PHI:1211#(Sc_Ctk1)#5518#Fusarium_graminearum#reduced_virulence	No definition line	72.1088
MHUMG1_61411	31	0	I1S0Z2#PHI:1296#GzAPSES004#5518#Fusarium_graminearum#reduced_virulence	No definition line	72.0544
MHUMG1_92211	22	0	Q5AJB1#PHI:3321#Tfp1#5476#Candida_albicans#loss_of_pathogenicity	No definition line	72.0339
MHUMG1_103391	39	0	G4MRP8#PHI:2190#MoCYP51A#318829#Magnaporthe_oryzae#reduced_virulence	No definition line	71.9907
MHUMG1_40851	9	0	G5EHZ3#PHI:9055#MoIVD_(MGG_02540)#318829#Magnaporthe_oryzae#reduced_virulence	No definition line	71.9794
MHUMG1_37611	6	4.1296e-144	W7MCU7#PHI:7597#FvDim5#117187#Fusarium_verticillioides#reduced_virulence	No definition line	71.9723
MHUMG1_61591	38	1.71896e-123	A7F6T5#PHI:7696#THR1#5180#Sclerotinia_sclerotiorum#unaffected_pathogenicity	No definition line	71.9697
MHUMG1_55061	5	1.4857e-103	I1S248#PHI:8914#FgVPS24_(FGSG_10832)#5518#Fusarium_graminearum#lethal	No definition line	71.9298
MHUMG1_57951	45	0	I1S0G8#PHI:1247#FGSG_10196#5518#Fusarium_graminearum#unaffected_pathogenicity	No definition line	71.875
MHUMG1_31861	8	0	I1RXT3#PHI:7672#FgLetm1#5518#Fusarium_graminearum#reduced_virulence	No definition line	71.8232
MHUMG1_81771	6	0	E3QNW8#PHI:6228#KRE6#31870#Colletotrichum_graminicola#reduced_virulence	No definition line	71.8107
MHUMG1_55031	2	1.47799e-142	I1S245#PHI:1659#GzCCCH003#5518#Fusarium_graminearum#unaffected_pathogenicity	No definition line	71.8033
MHUMG1_60641	11	0	I1SA65#PHI:1440__PHI:5574#GzNot002__FgNOT3#5518#Fusarium_graminearum#reduced_virulence	No definition line	71.7728
MHUMG1_89581	9	0	I1RE91#PHI:8925#FgPLD2_(FGSG_01973)#5518#Fusarium_graminearum#unaffected_pathogenicity	No definition line	71.7521
MHUMG1_28771	56	0	G4N471#PHI:2098#Calcium-transporting_ATPase_3#318829#Magnaporthe_oryzae#loss_of_pathogenicity	No definition line	71.7431
MHUMG1_102291	464	0	I1RCJ5#PHI:1212#(Sc_Rim15)#5518#Fusarium_graminearum#reduced_virulence	No definition line	71.6933
MHUMG1_2261	27	0	G2XAE9#PHI:5387#VdCYC8#27337#Verticillium_dahliae#reduced_virulence	No definition line	71.6749
MHUMG1_14301	8	0	W7LT88#PHI:2463#RGSC1#117187#Fusarium_verticillioides#unaffected_pathogenicity	No definition line	71.643
MHUMG1_75521	40	0	G4N745#PHI:5083#MoAcat2#318829#Magnaporthe_oryzae#reduced_virulence	No definition line	71.6019
MHUMG1_83581	26	0	Q0U2A0#PHI:2255#Abd1#13684#Parastagonospora_nodorum#unaffected_pathogenicity	No definition line	71.5877
MHUMG1_73271	38	2.12613e-90	Q8J2P6#PHI:317#RHBA#746128#Aspergillus_fumigatus#reduced_virulence	No definition line	71.5847
MHUMG1_78561	4	2.56923e-70	I1RZC6#PHI:1088#FGSG_09759#5518#Fusarium_graminearum#unaffected_pathogenicity	No definition line	71.5686
MHUMG1_31511	13	5.19009e-143	Q524W4#PHI:2084#Moatg18#318829#Magnaporthe_oryzae#reduced_virulence	No definition line	71.5517
MHUMG1_65541	5	0	Q4I6S5#PHI:6898#FgMon1#5518#Fusarium_graminearum#reduced_virulence	No definition line	71.529
MHUMG1_13621	18	0	I1RYN7#PHI:1299#GzAT003#5518#Fusarium_graminearum#unaffected_pathogenicity	No definition line	71.4894
MHUMG1_102221	6	0	I1RCJ0#PHI:1304#GzbHLH005#5518#Fusarium_graminearum#reduced_virulence	No definition line	71.4286
MHUMG1_26151	12	2.15201e-124	F9X691#PHI:4914#ZtCBR1#1047171#Zymoseptoria_tritici#reduced_virulence	No definition line	71.4286
MHUMG1_36981	261	5.92905e-117	I1RG27#PHI:1442#GzDNL#5518#Fusarium_graminearum#unaffected_pathogenicity	No definition line	71.4286
MHUMG1_53081	81	2.09356e-91	I1S018#PHI:1689#GzZC004#5518#Fusarium_graminearum#unaffected_pathogenicity	No definition line	71.4286
MHUMG1_37511	30	8.18761e-88	I1RC95#PHI:1566#GzOB006#5518#Fusarium_graminearum#lethal	No definition line	71.4286
MHUMG1_15421	10	1.12503e-42	Q2I0M6#PHI:1051#CTB3#29003#Cercospora_nicotianae#reduced_virulence	No definition line	71.4286
MHUMG1_51211	8	6.00658e-30	C5P3X6#PHI:479#MEP1#199306#Coccidioides_posadasii#reduced_virulence	No definition line	71.4286
MHUMG1_81821	4	4.82125e-25	G5EH72#PHI:5233#MoARG5_6#318829#Magnaporthe_oryzae#loss_of_pathogenicity	No definition line	71.4286
MHUMG1_59461	20	3.0706e-22	Q4WF54#PHI:2322#SidH#746128#Aspergillus_fumigatus#reduced_virulence	No definition line	71.4286
MHUMG1_87781	7	2.24318e-21	C5P3X6#PHI:479#MEP1#199306#Coccidioides_posadasii#reduced_virulence	No definition line	71.4286
MHUMG1_83751	15	0	I1RBE8#PHI:9047#FgPah1_(FGSG_00866)#5518#Fusarium_graminearum#reduced_virulence	No definition line	71.3467
MHUMG1_78731	5	0	N4VBG2#PHI:6970#copag1#5465#Colletotrichum_orbiculare#reduced_virulence	No definition line	71.3166
MHUMG1_78001	5	0	G4MSK7#PHI:7149#Moglo3#318829#Magnaporthe_oryzae#reduced_virulence	No definition line	71.2274
MHUMG1_77321	4	9.27993e-177	I1RMC1#PHI:1678#GzGRF#5518#Fusarium_graminearum#unaffected_pathogenicity	No definition line	71.1911
MHUMG1_31131	14	0	A0A098DK45#PHI:7123#Fgvps39#5518#Fusarium_graminearum#reduced_virulence	No definition line	71.1771
MHUMG1_45091	17	0	I1RNH4#PHI:5028#gta1#5518#Fusarium_graminearum#unaffected_pathogenicity__reduced_virulence	No definition line	71.173
MHUMG1_35671	57	0	J5JIF8#PHI:7153#pmcC#176275#Beauveria_bassiana#reduced_virulence	No definition line	71.1538
MHUMG1_55251	26	1.47033e-168	G4NHC2#PHI:5034#MoADH1#318829#Magnaporthe_oryzae#unaffected_pathogenicity	No definition line	71.1429
MHUMG1_57161	17	1.93109e-58	G4N0E4#PHI:4056#Ldp1#318829#Magnaporthe_oryzae#unaffected_pathogenicity	No definition line	71.0938
MHUMG1_77471	13	0	E2GL14#PHI:2334#BcNma#40559#Botrytis_cinerea#reduced_virulence	No definition line	71.0914
MHUMG1_44201	268	0	I1RN54#PHI:1214#FGSG_07816#5518#Fusarium_graminearum#reduced_virulence	No definition line	71.0583
MHUMG1_5061	11	0	G4MMK2#PHI:3975#MoIlv2#318829#Magnaporthe_oryzae#loss_of_pathogenicity	No definition line	71.0317
MHUMG1_92781	54	0	G4NGP6#PHI:2097#Neo1#318829#Magnaporthe_oryzae#loss_of_pathogenicity	No definition line	70.9091
MHUMG1_33921	9	1.55102e-154	B0YE73#PHI:7591#erg25B#746128#Aspergillus_fumigatus#unaffected_pathogenicity	No definition line	70.9091
MHUMG1_13471	10	6.17906e-168	Q696X2#PHI:414#GOX1#13684#Parastagonospora_nodorum#unaffected_pathogenicity	No definition line	70.903
MHUMG1_4401	31	0	Q8NJS2#PHI:697#ugt51E1#5022#Leptosphaeria_maculans#unaffected_pathogenicity	No definition line	70.8661
MHUMG1_73351	253	0	I1RTL1#PHI:1245#FGSG_07520#5518#Fusarium_graminearum#unaffected_pathogenicity	No definition line	70.8419
MHUMG1_93211	14	0	I1RPA0#PHI:1375#GzC2H038#5518#Fusarium_graminearum#unaffected_pathogenicity	No definition line	70.8333
MHUMG1_103291	6	1.13174e-40	I1RXD4#PHI:1596#GzOB036#5518#Fusarium_graminearum#unaffected_pathogenicity	No definition line	70.7865
MHUMG1_40101	258	0	I1RNY7#PHI:1181#(Sc_Kic1)#5518#Fusarium_graminearum#reduced_virulence	No definition line	70.767
MHUMG1_24911	10	0	Q1L2E2#PHI:595__PHI:2248#ALS1__Als1#13684#Parastagonospora_nodorum#reduced_virulence__loss_of_pathogenicity	No definition line	70.7516
MHUMG1_53161	297	0	I1RZN4#PHI:1753#GzZC068#5518#Fusarium_graminearum#unaffected_pathogenicity	No definition line	70.7169
MHUMG1_42791	9	0	A0A0A2JZB1#PHI:8722__PHI:8724#PeCat__PeSat#27334#Penicillium_expansum#unaffected_pathogenicity__reduced_virulence	No definition line	70.6806
MHUMG1_108781	357	0	I1RRS3#PHI:1816#GzZC131#5518#Fusarium_graminearum#unaffected_pathogenicity	No definition line	70.68
MHUMG1_72401	8	0	I1RTA6#PHI:3863#FgGAL83#5518#Fusarium_graminearum#reduced_virulence	No definition line	70.5882
MHUMG1_100311	141	0	I1RUM9#PHI:1396#GzC2H059#5518#Fusarium_graminearum#reduced_virulence	No definition line	70.5882
MHUMG1_8671	10	4.1788e-122	Q5ANA8#PHI:6795#CaMCA1#5476#Candida_albicans#reduced_virulence	No definition line	70.5882
MHUMG1_71201	3	1.55777e-133	G4MR53#PHI:7188#MoCAPB#318829#Magnaporthe_oryzae#reduced_virulence	No definition line	70.5263
MHUMG1_90911	90	0	A4RJV3#PHI:6135__PHI:6636#PEF1__MoMdv1#318829#Magnaporthe_oryzae#reduced_virulence	No definition line	70.4615
MHUMG1_43061	7	7.63873e-162	Q51LD2#PHI:2071#Moatg3#318829#Magnaporthe_oryzae#loss_of_pathogenicity	No definition line	70.4545
MHUMG1_32381	253	0	I1RB84#PHI:1263#FGSG_00792#5518#Fusarium_graminearum#unaffected_pathogenicity	No definition line	70.4132
MHUMG1_28481	4	0	I1RZZ3#PHI:2728#FgERG4#5518#Fusarium_graminearum#reduced_virulence	No definition line	70.4044
MHUMG1_83931	7	0	S5FRT9#PHI:3828#AbaA#5518#Fusarium_graminearum#unaffected_pathogenicity	No definition line	70.3883
MHUMG1_51431	257	1.95885e-28	I1RHA1#PHI:1270#FGSG_03146#5518#Fusarium_graminearum#unaffected_pathogenicity	No definition line	70.3704
MHUMG1_32421	11	0	J4KQS2#PHI:8671#phr1_(EJP69699)#176275#Beauveria_bassiana#unaffected_pathogenicity	No definition line	70.3571
MHUMG1_3041	15	0	I1RMG9#PHI:1011#FET3#5518#Fusarium_graminearum#unaffected_pathogenicity	No definition line	70.3204
MHUMG1_73681	5	0	G4NJD1#PHI:2171#Peroxisomal_copper_amine_oxidase#318829#Magnaporthe_oryzae#reduced_virulence	No definition line	70.2586
MHUMG1_40261	8	6.75949e-132	I1RB25#PHI:1473#GzHMG005#5518#Fusarium_graminearum#reduced_virulence	No definition line	70.2055
MHUMG1_11991	5	0	I1RW22#PHI:1439#GzNot001#5518#Fusarium_graminearum#lethal	No definition line	70.1754
MHUMG1_72171	8	0	G4MZ63#PHI:3824#MET12#318829#Magnaporthe_oryzae#unaffected_pathogenicity__loss_of_pathogenicity	No definition line	70.1299
MHUMG1_83831	11	0	I1RBF6#PHI:1565#GzOB005#5518#Fusarium_graminearum#unaffected_pathogenicity	No definition line	70.1275
MHUMG1_65611	168	0	I1RSE9#PHI:1917#GzZC232#5518#Fusarium_graminearum#reduced_virulence	No definition line	70.1201
MHUMG1_40361	54	0	I1RB16#PHI:1967#GzZC282#5518#Fusarium_graminearum#reduced_virulence	No definition line	70.0935
MHUMG1_77871	1	1.37994e-121	I1RZ94#PHI:1649#GzWing021#5518#Fusarium_graminearum#unaffected_pathogenicity	No definition line	70.0361
MHUMG1_90961	2	0	I1RYY6#PHI:6094#FgVps17#5518#Fusarium_graminearum#reduced_virulence	No definition line	70.0159
MHUMG1_74471	131	2.23869e-12	I1RV71#PHI:1812#GzZC127#5518#Fusarium_graminearum#unaffected_pathogenicity	No definition line	70
MHUMG1_102121	15	0	I1RCI0#PHI:1454#GzAra002#5518#Fusarium_graminearum#unaffected_pathogenicity	No definition line	69.9851
MHUMG1_101741	253	0	I1RCF7#PHI:1220#FGSG_01271#5518#Fusarium_graminearum#lethal	No definition line	69.9088
MHUMG1_106301	73	0	I1RL06#PHI:3697__PHI:3925#FgABC1__FgABC3#5518#Fusarium_graminearum#reduced_virulence	No definition line	69.8424
MHUMG1_41731	15	0	W7MGE8#PHI:8037#Fvlds1#117187#Fusarium_verticillioides#reduced_virulence	No definition line	69.7574
MHUMG1_67431	46	0	J4KLZ9#PHI:7155#pmr1#176275#Beauveria_bassiana#reduced_virulence	No definition line	69.7541
MHUMG1_92091	7	0	A4R5F6#PHI:5234#MoARG7#318829#Magnaporthe_oryzae#reduced_virulence	No definition line	69.7517
MHUMG1_55571	11	8.85571e-61	I1S2A0#PHI:1653#GzWing026#5518#Fusarium_graminearum#unaffected_pathogenicity	No definition line	69.7479
MHUMG1_79091	263	0	I1RQ67#PHI:1255#FGSG_06206#5518#Fusarium_graminearum#unaffected_pathogenicity	No definition line	69.7222
MHUMG1_24051	25	1.76499e-142	I1S7Z8#PHI:1432#GzC2H100#5518#Fusarium_graminearum#unaffected_pathogenicity	No definition line	69.7222
MHUMG1_80711	7	0	Q4WP25#PHI:2542#ERG12#746128#Aspergillus_fumigatus#lethal	No definition line	69.6507
MHUMG1_10641	2	0	I1RV65#PHI:1398#GzC2H061#5518#Fusarium_graminearum#unaffected_pathogenicity	No definition line	69.6462
MHUMG1_80941	336	7.47787e-143	I1RIH3#PHI:1710#GzZC025#5518#Fusarium_graminearum#unaffected_pathogenicity	No definition line	69.5652
MHUMG1_61601	9	8.84693e-67	A7F6T4#PHI:7695#SCD1#5180#Sclerotinia_sclerotiorum#unaffected_pathogenicity	No definition line	69.5652
MHUMG1_66381	7	0	Q4WKG5#PHI:2530#TUB1#746128#Aspergillus_fumigatus#lethal__loss_of_pathogenicity	No definition line	69.5556
MHUMG1_80871	10	0	Q9UVG2#PHI:177#ODC#13684#Parastagonospora_nodorum#reduced_virulence	No definition line	69.5122
MHUMG1_22891	12	6.15944e-155	A0A0D2XEI7#PHI:9050#FolVam7_(FOXG_02319)#5507#Fusarium_oxysporum#reduced_virulence	No definition line	69.4823
MHUMG1_39621	13	1.72332e-145	A7ESB3#PHI:3329#Ss-oah1#5180#Sclerotinia_sclerotiorum#reduced_virulence	No definition line	69.4737
MHUMG1_49381	3	0	Q4WP25#PHI:2542#ERG12#746128#Aspergillus_fumigatus#lethal	No definition line	69.4505
MHUMG1_17181	5	0	G4N9W2#PHI:6607#ARRDC1#318829#Magnaporthe_oryzae#reduced_virulence	No definition line	69.4313
MHUMG1_41271	4	0	C6ZRH8#PHI:2976#CgOPT1#474922#Colletotrichum_gloeosporioides#reduced_virulence	No definition line	69.4134
MHUMG1_2211	9	0	Q4WLR6#PHI:7653#trpA#746128#Aspergillus_fumigatus#reduced_virulence	No definition line	69.4118
MHUMG1_74141	68	0	Q9UW03#PHI:202__PHI:1160__PHI:2309#BcatrB#40559#Botrytis_cinerea#unaffected_pathogenicity__reduced_virulence__chemistry_target:_sensitivity_to_chemical	No definition line	69.4109
MHUMG1_72541	10	1.65297e-160	I1RT91#PHI:1388#GzC2H051#5518#Fusarium_graminearum#unaffected_pathogenicity	No definition line	69.4006
MHUMG1_68811	66	1.03288e-106	Q5AND9#PHI:7009#arf2#5476#Candida_albicans#reduced_virulence	No definition line	69.3694
MHUMG1_15361	26	1.9693e-113	Q4WMR3#PHI:2526#LUC7#746128#Aspergillus_fumigatus#lethal	No definition line	69.3277
MHUMG1_24991	79	0	G4N7K8#PHI:9032#Mocrn1_(MGG_06389)#318829#Magnaporthe_oryzae#reduced_virulence__unaffected_pathogenicity	No definition line	69.3182
MHUMG1_72331	9	0	I1RT82#PHI:1287#FGSG_07381#5518#Fusarium_graminearum#unaffected_pathogenicity	No definition line	69.2982
MHUMG1_71571	17	1.34493e-176	A4QVH4#PHI:5187#MoCCP1#318829#Magnaporthe_oryzae#reduced_virulence	No definition line	69.2529
MHUMG1_60251	28	4.79116e-56	I1S0Q0#PHI:1670#GzCCHC010#5518#Fusarium_graminearum#unaffected_pathogenicity	No definition line	69.2308
MHUMG1_99971	28	2.68136e-49	W7N2B4#PHI:3381#FVEG_12533#117187#Fusarium_verticillioides#unaffected_pathogenicity	No definition line	69.2308
MHUMG1_12191	23	4.5936e-35	J4WD57#PHI:7593#VVD#176275#Beauveria_bassiana#reduced_virulence	No definition line	69.2308
MHUMG1_60961	11	6.40379e-33	B4EDS9#PHI:5297#BCAL2200#95486#Burkholderia_cenocepacia#reduced_virulence	No definition line	69.2308
MHUMG1_62421	171	3.8784e-21	I1RKR4#PHI:1868#GzZC183#5518#Fusarium_graminearum#unaffected_pathogenicity	No definition line	69.2308
MHUMG1_98211	6	6.21814e-06	C5P3X6#PHI:479#MEP1#199306#Coccidioides_posadasii#reduced_virulence	No definition line	69.2308
MHUMG1_12641	10	0	G4NB58#PHI:5471#MoDac#318829#Magnaporthe_oryzae#reduced_virulence	No definition line	69.1954
MHUMG1_92101	4	4.28664e-113	O42621#PHI:121#PTH3#318829#Magnaporthe_oryzae#loss_of_pathogenicity	No definition line	69.163
MHUMG1_12701	289	3.17219e-157	I1RWF1#PHI:1403#GzC2H066#5518#Fusarium_graminearum#reduced_virulence	No definition line	69.1589
MHUMG1_17091	282	2.95073e-45	Q4P9P1#PHI:2237#Rbf1#5270#Ustilago_maydis#loss_of_pathogenicity	No definition line	69.1589
MHUMG1_5831	23	0	B9DR51#PHI:1133#Lmepi#5022#Leptosphaeria_maculans#loss_of_pathogenicity	No definition line	69.1489
MHUMG1_1101	136	4.62569e-143	I1RD84#PHI:1355#GzC2H015#5518#Fusarium_graminearum#unaffected_pathogenicity	No definition line	69.1429
MHUMG1_89401	82	0	G4XVC0#PHI:2302#CHS5#318829#Magnaporthe_oryzae#loss_of_pathogenicity	No definition line	69.103
MHUMG1_22731	6	0	Q4X256#PHI:6556#mecA#746128#Aspergillus_fumigatus#unaffected_pathogenicity__reduced_virulence	No definition line	69.0385
MHUMG1_102371	221	0	I1RCK0#PHI:1920#GzZC235#5518#Fusarium_graminearum#unaffected_pathogenicity	No definition line	69.0299
MHUMG1_13221	9	0	I1RW84#PHI:6183#FgVps27#5518#Fusarium_graminearum#reduced_virulence	No definition line	68.9933
MHUMG1_49751	327	0	I1RGD9#PHI:1941#GzZC256#5518#Fusarium_graminearum#unaffected_pathogenicity	No definition line	68.9933
MHUMG1_32261	261	0	I1RB79#PHI:1249#FGSG_00786#5518#Fusarium_graminearum#unaffected_pathogenicity	No definition line	68.9764
MHUMG1_92601	626	0	I1RME6#PHI:1274#FGSG_05135#5518#Fusarium_graminearum#unaffected_pathogenicity	No definition line	68.9445
MHUMG1_6901	35	0	I1S2I3#PHI:1695#GzZC010#5518#Fusarium_graminearum#unaffected_pathogenicity	No definition line	68.9189
MHUMG1_40521	15	8.62427e-87	G4NFU3#PHI:2103#MGG_08710.5#318829#Magnaporthe_oryzae#unaffected_pathogenicity	No definition line	68.8716
MHUMG1_49291	13	9.25616e-139	G4NCG1#PHI:3234#MoLYS20#318829#Magnaporthe_oryzae#reduced_virulence	No definition line	68.8406
MHUMG1_52771	252	0	I1RJM9#PHI:1221#FGSG_04054#5518#Fusarium_graminearum#lethal	No definition line	68.7747
MHUMG1_68631	13	0	I1RBU0#PHI:1632#GzWing004#5518#Fusarium_graminearum#unaffected_pathogenicity	No definition line	68.7601
MHUMG1_54711	9	0	I1RM25#PHI:1579#GzOB019#5518#Fusarium_graminearum#unaffected_pathogenicity	No definition line	68.75
MHUMG1_69631	16	0	G4MQB0#PHI:3066#MoRga6#318829#Magnaporthe_oryzae#unaffected_pathogenicity	No definition line	68.75
MHUMG1_28871	116	1.18266e-116	I1S584#PHI:1687#GzZC002#5518#Fusarium_graminearum#unaffected_pathogenicity	No definition line	68.75
MHUMG1_19641	187	3.44297e-88	I1RFK9#PHI:1269#FGSG_02488#5518#Fusarium_graminearum#unaffected_pathogenicity	No definition line	68.75
MHUMG1_73921	197	2.68788e-63	I1RVR1#PHI:1860#GzZC175#5518#Fusarium_graminearum#unaffected_pathogenicity	No definition line	68.75
MHUMG1_3371	9	1.47725e-53	Q00368#PHI:27#CAP20#474922#Colletotrichum_gloeosporioides#loss_of_pathogenicity	No definition line	68.75
MHUMG1_93431	13	4.93104e-12	Q945T9#PHI:653#GIP2#67593#Phytophthora_sojae#effector_(plant_avirulence_determinant)	No definition line	68.75
MHUMG1_63651	21	7.31647e-11	B2HHI1#PHI:3364#MMAR_1663#1781#Mycobacterium_marinum#reduced_virulence	No definition line	68.75
MHUMG1_13591	271	0	Q7Z8E9#PHI:518#MST20#318829#Magnaporthe_oryzae#unaffected_pathogenicity	No definition line	68.7086
MHUMG1_73831	10	3.65638e-111	G4MXC5#PHI:5190#MoPRX1#318829#Magnaporthe_oryzae#reduced_virulence	No definition line	68.6916
MHUMG1_89281	43	0	B5M4A8#PHI:2116__PHI:2301#CHS7#318829#Magnaporthe_oryzae#reduced_virulence	No definition line	68.6885
MHUMG1_2141	10	0	Q4WNW5#PHI:2970#argB#746128#Aspergillus_fumigatus#unaffected_pathogenicity	No definition line	68.661
MHUMG1_45191	258	0	I1RNG8#PHI:1176#(Sc_Atg1)#5518#Fusarium_graminearum#reduced_virulence	No definition line	68.6552
MHUMG1_87731	12	2.78598e-56	I1RSG9#PHI:1466#GzCCAAT006#5518#Fusarium_graminearum#unaffected_pathogenicity	No definition line	68.6131
MHUMG1_87251	30	0	G4MVI2#PHI:5613#FZC21#318829#Magnaporthe_oryzae#unaffected_pathogenicity	No definition line	68.5644
MHUMG1_89631	299	0	G4MT25#PHI:5591#MoNIT4#318829#Magnaporthe_oryzae#unaffected_pathogenicity	No definition line	68.5535
MHUMG1_89171	32	0	Q5EMY3#PHI:860#MSP1#318829#Magnaporthe_oryzae#reduced_virulence	No definition line	68.5096
MHUMG1_7911	15	0	I1RQE9#PHI:1317#GzBrom002#5518#Fusarium_graminearum#reduced_virulence	No definition line	68.4801
MHUMG1_22691	40	0	I1RR41#PHI:6186#FgCHS8#5518#Fusarium_graminearum#reduced_virulence	No definition line	68.4588
MHUMG1_10981	74	0	Q874F3#PHI:391#ABC2#318829#Magnaporthe_oryzae#unaffected_pathogenicity	No definition line	68.439
MHUMG1_59891	9	0	I1S0J3#PHI:1526#GzHOMEL036#5518#Fusarium_graminearum#unaffected_pathogenicity	No definition line	68.4369
MHUMG1_221	101	0	I1S2J9#PHI:3924__PHI:8224__PHI:9036#FgABC1__Fg10995__fgm5_(FGSG_10995)#5518#Fusarium_graminearum#reduced_virulence	No definition line	68.4211
MHUMG1_68261	118	0	I1S4M4#PHI:1426#GzC2H094#5518#Fusarium_graminearum#unaffected_pathogenicity	No definition line	68.4211
MHUMG1_50831	29	3.33682e-17	I1RC95#PHI:1566#GzOB006#5518#Fusarium_graminearum#lethal	No definition line	68.4211
MHUMG1_54481	35	7.32815e-11	A0A164J6A6#PHI:6447#rarA#573#Klebsiella_pneumoniae#reduced_virulence	No definition line	68.4211
MHUMG1_35451	63	5.82411e-10	G4MUR7#PHI:4475#MoTup1#318829#Magnaporthe_oryzae#loss_of_pathogenicity	No definition line	68.4211
MHUMG1_81751	82	5.24671e-08	Q44135#PHI:8050#cpxA#715#Actinobacillus_pleuropneumoniae#reduced_virulence	No definition line	68.4211
MHUMG1_31021	13	3.03347e-06	Q8TGD1#PHI:254#FOW1#5507#Fusarium_oxysporum#reduced_virulence	No definition line	68.4211
MHUMG1_31491	9	7.85847e-90	I1RKA4#PHI:2432#FgRgsA#5518#Fusarium_graminearum#reduced_virulence	No definition line	68.3333
MHUMG1_88241	6	0	Q7ZA48#PHI:323#VFGLU1#93591#Lecanicillium_fungicola#reduced_virulence	No definition line	68.2692
MHUMG1_19821	6	0	Q4WQ27#PHI:2519#LYS9#746128#Aspergillus_fumigatus#lethal	No definition line	68.254
MHUMG1_53331	5	1.57168e-141	I1RZM2#PHI:1318#GzBrom003#5518#Fusarium_graminearum#unaffected_pathogenicity	No definition line	68.1818
MHUMG1_34841	313	1.71005e-29	I1S9U4#PHI:1719#GzZC034#5518#Fusarium_graminearum#unaffected_pathogenicity	No definition line	68.1818
MHUMG1_11481	10	1.9092e-26	G4NCG1#PHI:3234#MoLYS20#318829#Magnaporthe_oryzae#reduced_virulence	No definition line	68.1818
MHUMG1_24771	98	6.13327e-23	Q4WR83#PHI:2321#SidI#746128#Aspergillus_fumigatus#reduced_virulence	No definition line	68.1818
MHUMG1_78051	98	3.49463e-10	B2SRG1#PHI:1141#raxB#347#Xanthomonas_oryzae#increased_virulence_(hypervirulence)	No definition line	68.1818
MHUMG1_46601	4	9.70654e-52	A0A0L9JQ40#PHI:6892#iscU#28901#Salmonella_enterica#reduced_virulence	No definition line	68.1416
MHUMG1_82321	11	0	I1S8Y9#PHI:1182#(Sc_Mec1)#5518#Fusarium_graminearum#reduced_virulence	No definition line	68.0988
MHUMG1_10821	75	0	F0XP73#PHI:2693#GcABC-G1#226899#Grosmannia_clavigera#reduced_virulence	No definition line	68.0809
MHUMG1_31121	18	0	A0A098DK45#PHI:7123#Fgvps39#5518#Fusarium_graminearum#reduced_virulence	No definition line	68.0502
MHUMG1_56421	315	0	I1RJY6#PHI:1707#GzZC022#5518#Fusarium_graminearum#unaffected_pathogenicity	No definition line	68
MHUMG1_92891	258	7.19026e-134	I1RQN6#PHI:1974#GzZC289#5518#Fusarium_graminearum#unaffected_pathogenicity	No definition line	68
MHUMG1_1211	8	0	I1RJD6#PHI:2408#FgMT1#5518#Fusarium_graminearum#unaffected_pathogenicity	No definition line	67.9842
MHUMG1_108001	10	0	P58371#PHI:2117#SPM1#318829#Magnaporthe_oryzae#reduced_virulence	No definition line	67.9612
MHUMG1_94121	9	0	M1W4B7#PHI:6266#cptRNA-ipt#5111#Claviceps_purpurea#reduced_virulence__loss_of_pathogenicity	No definition line	67.9487
MHUMG1_75601	6	0	I1RYF6#PHI:1597#GzOB037#5518#Fusarium_graminearum#unaffected_pathogenicity	No definition line	67.8887
MHUMG1_36551	5	0	I1RPZ1#PHI:1517#GzHOMEL013#5518#Fusarium_graminearum#lethal	No definition line	67.8439
MHUMG1_45361	5	0	Q4WJ77#PHI:7654#aroB#746128#Aspergillus_fumigatus#reduced_virulence	No definition line	67.7582
MHUMG1_35281	14	0	I1S7I6#PHI:1429#GzC2H097#5518#Fusarium_graminearum#unaffected_pathogenicity	No definition line	67.7321
MHUMG1_97461	188	0	I1RSR1#PHI:1797#GzZC112#5518#Fusarium_graminearum#unaffected_pathogenicity	No definition line	67.7301
MHUMG1_41061	5	8.53947e-124	G9MQ09#PHI:8509#tex10#29875#Trichoderma_virens#increased_virulence_(hypervirulence)	No definition line	67.7291
MHUMG1_74801	31	2.42692e-129	Q32WF7#PHI:2269#Mdh1#13684#Parastagonospora_nodorum#unaffected_pathogenicity	No definition line	67.6692
MHUMG1_91031	10	0	C6ZRH8#PHI:2976#CgOPT1#474922#Colletotrichum_gloeosporioides#reduced_virulence	No definition line	67.6218
MHUMG1_45971	12	1.6461e-108	I1RNI6#PHI:1309#GzbHLH010#5518#Fusarium_graminearum#lethal	No definition line	67.6101
MHUMG1_57111	2	0	Q4WJ71#PHI:2539#CDS1#746128#Aspergillus_fumigatus#lethal	No definition line	67.5926
MHUMG1_31671	7	0	I1RE49#PHI:7111#FgCAP1#5518#Fusarium_graminearum#reduced_virulence	No definition line	67.5522
MHUMG1_93241	25	0	I1RP98#PHI:1621#GzRUM1#5518#Fusarium_graminearum#unaffected_pathogenicity	No definition line	67.5219
MHUMG1_10211	9	0	Q4WK65#PHI:2639#Ilv3B#746128#Aspergillus_fumigatus#unaffected_pathogenicity__reduced_virulence	No definition line	67.4677
MHUMG1_70561	15	0	I1RC70#PHI:1303#GzbHLH004#5518#Fusarium_graminearum#unaffected_pathogenicity	No definition line	67.4556
MHUMG1_33691	46	1.6035e-66	Q6QIY0#PHI:2382#Upa2#5270#Ustilago_maydis#unaffected_pathogenicity	No definition line	67.4419
MHUMG1_109511	2	0	Q4X146#PHI:2515#ALG7#746128#Aspergillus_fumigatus#lethal	No definition line	67.4208
MHUMG1_60461	3	0	I1S0R5#PHI:5765__PHI:9049#ScOrtholog_NEM1__FgNem1_(FGSG_10302)#5518#Fusarium_graminearum#reduced_virulence	No definition line	67.3913
MHUMG1_26901	9	0	I1S828#PHI:1503#GzHMG035#5518#Fusarium_graminearum#unaffected_pathogenicity	No definition line	67.3851
MHUMG1_28291	5	2.48491e-128	Q4P245#PHI:2239#Spe-Sdh#5270#Ustilago_maydis#reduced_virulence	No definition line	67.3469
MHUMG1_23351	3	4.70585e-135	G4MUW5#PHI:888#MGG_01707#318829#Magnaporthe_oryzae#reduced_virulence	No definition line	67.3077
MHUMG1_41331	19	3.50994e-96	I1S8Y4#PHI:1338#GzbZIP020#5518#Fusarium_graminearum#unaffected_pathogenicity	No definition line	67.2862
MHUMG1_68591	6	2.98848e-147	G4MMH7#PHI:2115__PHI:4494#Annexin_A7__AnnA7#318829#Magnaporthe_oryzae#loss_of_pathogenicity__reduced_virulence	No definition line	66.9811
MHUMG1_89181	6	1.24726e-42	I1RE60#PHI:1481#GzHMG013#5518#Fusarium_graminearum#unaffected_pathogenicity	No definition line	66.9811
MHUMG1_81831	8	5.43494e-136	G5EH72#PHI:5233#MoARG5_6#318829#Magnaporthe_oryzae#loss_of_pathogenicity	No definition line	66.9725
MHUMG1_85781	4	0	G4N703#PHI:2081#Moatg15#318829#Magnaporthe_oryzae#loss_of_pathogenicity	No definition line	66.9368
MHUMG1_66551	7	0	A0A0D2X9S0#PHI:7684#ntr1#5507#Fusarium_oxysporum#increased_virulence_(hypervirulence)	No definition line	66.9246
MHUMG1_54501	8	0	G4MLK2#PHI:8040__PHI:8047#Mouba2__Uba2#318829#Magnaporthe_oryzae#reduced_virulence	No definition line	66.9159
MHUMG1_66041	254	0	I1RA39#PHI:1205#(Sc_CDC15)#5518#Fusarium_graminearum#reduced_virulence	No definition line	66.9056
MHUMG1_56301	8	0	Q4WZV9#PHI:6555#sF#746128#Aspergillus_fumigatus#unaffected_pathogenicity	No definition line	66.8844
MHUMG1_34411	319	0	I1RYY1#PHI:1757#GzZC072#5518#Fusarium_graminearum#unaffected_pathogenicity	No definition line	66.875
MHUMG1_57051	5	1.13616e-115	A9QUB2#PHI:2403#CSN1#169388#Fusarium_solani#increased_virulence_(hypervirulence)__reduced_virulence	No definition line	66.7969
MHUMG1_73371	45	0	J5K3K8#PHI:7151#pmcA#176275#Beauveria_bassiana#reduced_virulence	No definition line	66.7472
MHUMG1_56201	13	0	G4NIS9#PHI:785#MGG_04128#318829#Magnaporthe_oryzae#reduced_virulence	No definition line	66.7416
MHUMG1_11801	10	0	F5HAA8#PHI:424#PCK1#5207#Cryptococcus_neoformans#reduced_virulence	No definition line	66.7411
MHUMG1_3701	274	0	G4MKH9#PHI:3310#Mocod1#318829#Magnaporthe_oryzae#reduced_virulence	No definition line	66.6667
MHUMG1_32461	339	0	I1RB90#PHI:1983#GzZC298#5518#Fusarium_graminearum#lethal	No definition line	66.6667
MHUMG1_40731	11	0	Q6FSR7#PHI:3287#CgVps34#5478#Candida_glabrata#reduced_virulence	No definition line	66.6667
MHUMG1_52751	257	0	I1RJM8#PHI:1206#(Sp_Prp4)#5518#Fusarium_graminearum#reduced_virulence	No definition line	66.6667
MHUMG1_90451	278	0	G4MT75#PHI:3312#gta1#318829#Magnaporthe_oryzae#reduced_virulence	No definition line	66.6667
MHUMG1_102271	167	0	I1RCJ3#PHI:1351#GzC2H011#5518#Fusarium_graminearum#unaffected_pathogenicity	No definition line	66.6667
MHUMG1_31401	268	3.20029e-102	I1RKB4#PHI:1953#GzZC268#5518#Fusarium_graminearum#unaffected_pathogenicity	No definition line	66.6667
MHUMG1_77151	256	6.63543e-102	I1RQ27#PHI:1914#GzZC229#5518#Fusarium_graminearum#unaffected_pathogenicity	No definition line	66.6667
MHUMG1_47921	228	2.26919e-101	I1RX74#PHI:1771#GzZC086#5518#Fusarium_graminearum#unaffected_pathogenicity	No definition line	66.6667
MHUMG1_90371	122	1.80635e-87	I1RXE8#PHI:1763#GzZC078#5518#Fusarium_graminearum#unaffected_pathogenicity	No definition line	66.6667
MHUMG1_71941	5	3.21433e-46	G4MYT5#PHI:3485#MoSPC3#318829#Magnaporthe_oryzae#unaffected_pathogenicity	No definition line	66.6667
MHUMG1_29811	213	5.19942e-33	G4N853#PHI:5630#FZC35#318829#Magnaporthe_oryzae#unaffected_pathogenicity	No definition line	66.6667
MHUMG1_36841	3	3.33109e-32	I1RDG6#PHI:1555#GzMyb019#5518#Fusarium_graminearum#unaffected_pathogenicity	No definition line	66.6667
MHUMG1_64781	11	7.52939e-24	Q6WER3#PHI:432__PHI:4212__PHI:4242#FGL1__Fgl1#5518#Fusarium_graminearum#reduced_virulence	No definition line	66.6667
MHUMG1_15821	5	7.19933e-22	I1RN03#PHI:1372#GzC2H035#5518#Fusarium_graminearum#unaffected_pathogenicity	No definition line	66.6667
MHUMG1_58951	9	1.35411e-20	G4MVC5#PHI:6927#MoRAD6#318829#Magnaporthe_oryzae#reduced_virulence	No definition line	66.6667
MHUMG1_13241	130	1.77528e-20	A5F6S0#PHI:4108#fadD#666#Vibrio_cholerae#reduced_virulence__unaffected_pathogenicity	No definition line	66.6667
MHUMG1_14641	6	3.97931e-19	Q5ANH2#PHI:6660#CaArv1#5476#Candida_albicans#loss_of_pathogenicity	No definition line	66.6667
MHUMG1_16501	99	1.36213e-18	A5F6S0#PHI:4108#fadD#666#Vibrio_cholerae#reduced_virulence__unaffected_pathogenicity	No definition line	66.6667
MHUMG1_34751	8	3.22383e-16	J5JHE8#PHI:7377#Blys4#176275#Beauveria_bassiana#unaffected_pathogenicity	No definition line	66.6667
MHUMG1_61711	27	1.0687e-15	I1RC95#PHI:1566#GzOB006#5518#Fusarium_graminearum#lethal	No definition line	66.6667
MHUMG1_74551	86	9.15463e-13	I1RY91#PHI:1765#GzZC080#5518#Fusarium_graminearum#unaffected_pathogenicity	No definition line	66.6667
MHUMG1_35081	8	8.62521e-12	I1RKU6#PHI:1455#GzAra003#5518#Fusarium_graminearum#unaffected_pathogenicity	No definition line	66.6667
MHUMG1_48791	17	1.06417e-10	Q4UZL6#PHI:3958#XC_0423#339#Xanthomonas_campestris#reduced_virulence	No definition line	66.6667
MHUMG1_42221	74	5.54026e-10	G4NIQ8#PHI:5672#FZC69#318829#Magnaporthe_oryzae#unaffected_pathogenicity	No definition line	66.6667
MHUMG1_39651	9	6.07872e-10	C1KJH9#PHI:2850#AVR-Pita1#318829#Magnaporthe_oryzae#effector_(plant_avirulence_determinant)	No definition line	66.6667
MHUMG1_42351	45	1.30797e-06	E9QY26#PHI:2535#ERG11B#746128#Aspergillus_fumigatus#lethal__unaffected_pathogenicity__loss_of_pathogenicity	No definition line	66.6667
MHUMG1_67801	6	0	I1RAM0#PHI:7125#FgKar9#5518#Fusarium_graminearum#unaffected_pathogenicity	No definition line	66.5951
MHUMG1_80181	6	0	G4ML12#PHI:6739#MoGls2#318829#Magnaporthe_oryzae#reduced_virulence	No definition line	66.5618
MHUMG1_17211	16	0	I1ZIN3#PHI:6209#BbCyp9#176275#Beauveria_bassiana#unaffected_pathogenicity	No definition line	66.4845
MHUMG1_16711	19	3.85296e-167	A0MAR2#PHI:2858#FvVE1#117187#Fusarium_verticillioides#loss_of_pathogenicity	No definition line	66.4516
MHUMG1_11331	131	8.46655e-133	I1S8F7#PHI:1820#GzZC135#5518#Fusarium_graminearum#unaffected_pathogenicity	No definition line	66.4384
MHUMG1_55831	15	0	O59928#PHI:144#CHT42#29875#Trichoderma_virens#reduced_virulence	No definition line	66.4336
MHUMG1_101751	64	0	Q4WC58#PHI:3050#CHSF#746128#Aspergillus_fumigatus#reduced_virulence	No definition line	66.4007
MHUMG1_3671	12	0	I1REJ1#PHI:1662#GzCCHC002#5518#Fusarium_graminearum#unaffected_pathogenicity	No definition line	66.39
MHUMG1_9741	251	0	I1RJS7#PHI:1902#GzZC217#5518#Fusarium_graminearum#unaffected_pathogenicity	No definition line	66.3793
MHUMG1_91891	14	9.22164e-145	I1RYI2#PHI:3373#FgSho1#5518#Fusarium_graminearum#reduced_virulence	No definition line	66.343
MHUMG1_69781	20	1.369e-143	I1RC01#PHI:1506#GzHOME001#5518#Fusarium_graminearum#unaffected_pathogenicity	No definition line	66.3265
MHUMG1_108741	10	0	I1RRR9#PHI:1457#GzAra005#5518#Fusarium_graminearum#unaffected_pathogenicity	No definition line	66.3102
MHUMG1_67421	8	0	J4KLZ9#PHI:7155#pmr1#176275#Beauveria_bassiana#reduced_virulence	No definition line	66.2896
MHUMG1_28501	11	0	I1RZR4#PHI:8924#FgPLD1_(FGSG_09917)#5518#Fusarium_graminearum#reduced_virulence	No definition line	66.2366
MHUMG1_68161	5	5.4803e-37	G4NEF1#PHI:805#MGG_00124#318829#Magnaporthe_oryzae#reduced_virulence	No definition line	66.2338
MHUMG1_83611	18	1.78561e-145	Q4WJS6#PHI:6753#GlcA#746128#Aspergillus_fumigatus#lethal	No definition line	66.1017
MHUMG1_56981	4	4.22973e-103	Q4WGN8#PHI:8590#met8_(AFUA_7G05680)#746128#Aspergillus_fumigatus#reduced_virulence__unaffected_pathogenicity	No definition line	66.087
MHUMG1_79491	7	3.049e-157	I1RMR8#PHI:1516#GzHOMEL012#5518#Fusarium_graminearum#lethal	No definition line	66.0848
MHUMG1_31601	9	0	N4V0R3#PHI:3278#CoIra1#5465#Colletotrichum_orbiculare#reduced_virulence	No definition line	66.0606
MHUMG1_58851	16	6.27585e-155	Q4R1B9#PHI:2065#MSTU1#318829#Magnaporthe_oryzae#loss_of_pathogenicity	No definition line	66.055
MHUMG1_29031	11	3.63221e-139	A7F946#PHI:2411#Ss-ggt1#5180#Sclerotinia_sclerotiorum#reduced_virulence	No definition line	65.9574
MHUMG1_29531	55	4.40042e-140	Q4WQ36#PHI:6751#Fbx23#746128#Aspergillus_fumigatus#increased_virulence_(hypervirulence)	No definition line	65.8537
MHUMG1_2121	2	0	I1RQD8#PHI:1614#GzSART1#5518#Fusarium_graminearum#unaffected_pathogenicity	No definition line	65.8499
MHUMG1_14671	5	0	A0A290WFK0#PHI:7709#VEDA_05199#27337#Verticillium_dahliae#reduced_virulence__unaffected_pathogenicity	No definition line	65.8031
MHUMG1_105801	259	0	I1R9Z6#PHI:1989#GzZC304#5518#Fusarium_graminearum#unaffected_pathogenicity	No definition line	65.7895
MHUMG1_3181	261	2.34455e-28	I1RYK8#PHI:1847#GzZC162#5518#Fusarium_graminearum#unaffected_pathogenicity	No definition line	65.7895
MHUMG1_60291	11	0	Q4WYU7#PHI:2528#SLY1#746128#Aspergillus_fumigatus#lethal	No definition line	65.7858
MHUMG1_21131	12	5.52509e-162	F5HCK8#PHI:415#IPMDH#13684#Parastagonospora_nodorum#loss_of_pathogenicity	No definition line	65.7534
MHUMG1_13811	107	0	I1RYQ5#PHI:1246#FGSG_09513#5518#Fusarium_graminearum#unaffected_pathogenicity	No definition line	65.752
MHUMG1_8461	2	0	I1RQL1#PHI:1451#GzGH#5518#Fusarium_graminearum#unaffected_pathogenicity	No definition line	65.7465
MHUMG1_89261	20	0	A0A0C4DHR8#PHI:7682#nit1#5507#Fusarium_oxysporum#unaffected_pathogenicity	No definition line	65.6734
MHUMG1_46261	7	0	G4NBI7#PHI:2028#TGL1-2#318829#Magnaporthe_oryzae#unaffected_pathogenicity	No definition line	65.6566
MHUMG1_42611	256	0	I1RQN6#PHI:1974#GzZC289#5518#Fusarium_graminearum#unaffected_pathogenicity	No definition line	65.625
MHUMG1_28321	36	1.08848e-54	I1RZY2#PHI:1556#GzNH001#5518#Fusarium_graminearum#reduced_virulence	No definition line	65.625
MHUMG1_75291	24	6.91292e-124	I1RLS1#PHI:1369#GzC2H031#5518#Fusarium_graminearum#unaffected_pathogenicity	No definition line	65.6051
MHUMG1_2531	257	0	I1R9Z6#PHI:1989#GzZC304#5518#Fusarium_graminearum#unaffected_pathogenicity	No definition line	65.5702
MHUMG1_104371	21	0	A0A0J9ULI2#PHI:7683#nit2#5507#Fusarium_oxysporum#unaffected_pathogenicity	No definition line	65.5139
MHUMG1_65501	10	1.05759e-92	I1RSG9#PHI:1466#GzCCAAT006#5518#Fusarium_graminearum#unaffected_pathogenicity	No definition line	65.4167
MHUMG1_91431	3	3.36722e-126	Q4WVS3#PHI:7652#aroC#746128#Aspergillus_fumigatus#reduced_virulence	No definition line	65.4135
MHUMG1_20961	9	1.9272e-23	I1RMT3#PHI:1664#GzCCHC004#5518#Fusarium_graminearum#unaffected_pathogenicity	No definition line	65.3846
MHUMG1_2331	104	1.03934e-13	W2E906#PHI:3274#dhbF#1464#Paenibacillus_larvae#unaffected_pathogenicity	No definition line	65.3846
MHUMG1_4521	10	0	I1S216#PHI:1605#GzOB046#5518#Fusarium_graminearum#unaffected_pathogenicity	No definition line	65.3641
MHUMG1_62391	71	1.16555e-81	Q5AND9#PHI:7009#arf2#5476#Candida_albicans#reduced_virulence	No definition line	65.3631
MHUMG1_87711	4	4.13366e-71	I1RS54#PHI:1518#GzHOMEL016#5518#Fusarium_graminearum#unaffected_pathogenicity	No definition line	65.3595
MHUMG1_70261	252	0	I1RC35#PHI:1219#FGSG_01137#5518#Fusarium_graminearum#lethal	No definition line	65.2809
MHUMG1_20501	2	0	I1RR94#PHI:6122__PHI:5741#FGSG_06610__ScOrtholog_YKL153W#5518#Fusarium_graminearum#reduced_virulence	No definition line	65.2733
MHUMG1_77281	284	0	I1RMD1#PHI:1958#GzZC273#5518#Fusarium_graminearum#unaffected_pathogenicity	No definition line	65.2534
MHUMG1_101711	4	1.00503e-68	G4MRN1#PHI:7318#noxD#318829#Magnaporthe_oryzae#loss_of_pathogenicity	No definition line	65.2482
MHUMG1_14311	3	2.68881e-108	G4MVK9#PHI:5017#MoPEX11A#318829#Magnaporthe_oryzae#reduced_virulence	No definition line	65.2361
MHUMG1_25701	17	2.09434e-178	W7N2B4#PHI:3381#FVEG_12533#117187#Fusarium_verticillioides#unaffected_pathogenicity	No definition line	65.2174
MHUMG1_93931	412	2.27445e-17	I1RJY6#PHI:1707#GzZC022#5518#Fusarium_graminearum#unaffected_pathogenicity	No definition line	65.2174
MHUMG1_101651	52	2.7398e-15	I1RUC7#PHI:1260#FGSG_07816#5518#Fusarium_graminearum#unaffected_pathogenicity	No definition line	65.2174
MHUMG1_108951	7	7.48651e-10	Q945T9#PHI:653#GIP2#67593#Phytophthora_sojae#effector_(plant_avirulence_determinant)	No definition line	65.2174
MHUMG1_88911	242	6.96556e-08	J9VH94#PHI:2955#PKH2-02#5207#Cryptococcus_neoformans#loss_of_pathogenicity	No definition line	65.2174
MHUMG1_9301	20	0	I1RUP1#PHI:1447#GzGATA005#5518#Fusarium_graminearum#unaffected_pathogenicity	No definition line	65.1724
MHUMG1_28801	9	0	Q876Z6#PHI:375#REN1#5507#Fusarium_oxysporum#unaffected_pathogenicity	No definition line	65.1347
MHUMG1_9001	18	0	A0A0D2XVZ5#PHI:5236#Dnj1#5507#Fusarium_oxysporum#reduced_virulence	No definition line	65.1316
MHUMG1_15221	9	0	I1RQS8#PHI:1379#GzC2H042#5518#Fusarium_graminearum#reduced_virulence	No definition line	65.1292
MHUMG1_51081	10	0	I1S368#PHI:6127#PLC#5518#Fusarium_graminearum#unaffected_pathogenicity	No definition line	65.1163
MHUMG1_78941	18	0	G4NF65#PHI:3061__PHI:4055#MoRga1__Rga1#318829#Magnaporthe_oryzae#unaffected_pathogenicity	No definition line	65.0957
MHUMG1_55441	45	3.12389e-82	Q96VL3#PHI:339#CLPT1#290576#Colletotrichum_lindemuthianum#reduced_virulence	No definition line	65.0888
MHUMG1_5631	51	0	G4MNA5#PHI:2096#Calcium-transporting_ATPase_3#318829#Magnaporthe_oryzae#loss_of_pathogenicity	No definition line	65
MHUMG1_59141	40	1.42606e-145	W7N2C1#PHI:3384#FVEG_12530#117187#Fusarium_verticillioides#unaffected_pathogenicity	No definition line	65
MHUMG1_34811	111	4.59952e-145	I1RJE8#PHI:721#GRS1#5518#Fusarium_graminearum#unaffected_pathogenicity	No definition line	65
MHUMG1_4701	140	4.43118e-112	I1S1A5#PHI:1755#GzZC070#5518#Fusarium_graminearum#unaffected_pathogenicity	No definition line	65
MHUMG1_50561	179	5.94356e-36	Q4I0C5#PHI:1764#GzZC079#5518#Fusarium_graminearum#unaffected_pathogenicity	No definition line	65
MHUMG1_2191	6	2.14465e-20	I1RX64#PHI:1407#GzC2H071#5518#Fusarium_graminearum#lethal	No definition line	65
MHUMG1_104911	63	1.20358e-06	A0AUJ1#PHI:4182#Gib2#5207#Cryptococcus_neoformans#reduced_virulence	No definition line	65
MHUMG1_102351	20	0	G4N7U7#PHI:8629#MoAbp1_(MGG_06358)#318829#Magnaporthe_oryzae#reduced_virulence	No definition line	64.9281
MHUMG1_25881	258	0	I1RS57#PHI:1253#FGSG_06970#5518#Fusarium_graminearum#unaffected_pathogenicity	No definition line	64.906
MHUMG1_95791	56	0	I1RFY9#PHI:1357#GzC2H017#5518#Fusarium_graminearum#unaffected_pathogenicity	No definition line	64.9057
MHUMG1_19031	17	0	G4MZ47#PHI:2105#Calcium_permease#318829#Magnaporthe_oryzae#unaffected_pathogenicity__reduced_virulence	No definition line	64.8983
MHUMG1_23071	273	2.30503e-97	I1SAE9#PHI:1724#GzZC039#5518#Fusarium_graminearum#unaffected_pathogenicity	No definition line	64.8649
MHUMG1_83911	21	3.14864e-67	A0A0G4J7R2#PHI:7735#PbCYP3#318829#Magnaporthe_oryzae#reduced_virulence	No definition line	64.8649
MHUMG1_76851	7	4.28786e-130	G4N6R6#PHI:7113#MoERR2#318829#Magnaporthe_oryzae#unaffected_pathogenicity	No definition line	64.8208
MHUMG1_9421	3	0	W7N0U7#PHI:7145#FvSEL1#117187#Fusarium_verticillioides#reduced_virulence	No definition line	64.7904
MHUMG1_55851	255	0	I1S1V3#PHI:1238#FGSG_10725#5518#Fusarium_graminearum#lethal	No definition line	64.7561
MHUMG1_9721	16	0	I1RJS9#PHI:2326__PHI:2491__PHI:5720#PTC1__FgPTC1__ScOrtholog_PTC1#5518#Fusarium_graminearum#reduced_virulence__unaffected_pathogenicity	No definition line	64.7059
MHUMG1_12771	17	0	G4N6W1#PHI:5659#FZC61#318829#Magnaporthe_oryzae#unaffected_pathogenicity	No definition line	64.7059
MHUMG1_17831	104	0	G4NDE1#PHI:1017__PHI:2067#ABC4#318829#Magnaporthe_oryzae#reduced_virulence__loss_of_pathogenicity	No definition line	64.7059
MHUMG1_31581	65	0	I1RK94#PHI:1367#GzC2H028#5518#Fusarium_graminearum#unaffected_pathogenicity	No definition line	64.7059
MHUMG1_99921	253	8.07057e-154	I1RTX0#PHI:1871#GzZC186#5518#Fusarium_graminearum#lethal	No definition line	64.7059
MHUMG1_4231	107	7.38902e-120	I1S2J9#PHI:3924__PHI:8224__PHI:9036#FgABC1__Fg10995__fgm5_(FGSG_10995)#5518#Fusarium_graminearum#reduced_virulence	No definition line	64.7059
MHUMG1_41701	50	1.30536e-119	I1RUL5#PHI:1395#GzC2H058#5518#Fusarium_graminearum#unaffected_pathogenicity	No definition line	64.7059
MHUMG1_11281	19	3.92567e-118	Q0UA24#PHI:2256#Xdh1#13684#Parastagonospora_nodorum#unaffected_pathogenicity	No definition line	64.7059
MHUMG1_110061	24	4.14175e-105	G4MS58#PHI:881#MGG_04556#318829#Magnaporthe_oryzae#reduced_virulence	No definition line	64.7059
MHUMG1_31251	7	4.04067e-80	Q4WKJ9#PHI:2546#BRX1#746128#Aspergillus_fumigatus#lethal	No definition line	64.7059
MHUMG1_84371	15	1.35599e-61	I1RIS2#PHI:5353#Famfs1#282267#Fusarium_asiaticum#reduced_virulence	No definition line	64.7059
MHUMG1_77931	131	3.09046e-25	C4YFX2#PHI:211__PHI:6806#CaTUP1__tup1#5476#Candida_albicans#reduced_virulence	No definition line	64.7059
MHUMG1_38061	179	3.25825e-23	G4N853#PHI:5630#FZC35#318829#Magnaporthe_oryzae#unaffected_pathogenicity	No definition line	64.7059
MHUMG1_70341	254	7.28252e-16	I1RQN6#PHI:1974#GzZC289#5518#Fusarium_graminearum#unaffected_pathogenicity	No definition line	64.7059
MHUMG1_31961	8	2.48597e-14	G4NIB5#PHI:812#MGG_10702#318829#Magnaporthe_oryzae#reduced_virulence	No definition line	64.7059
MHUMG1_57371	9	3.96723e-10	I1SA30#PHI:1436#GzC2H105#5518#Fusarium_graminearum#reduced_virulence	No definition line	64.7059
MHUMG1_4091	47	3.24663e-07	G4N532#PHI:5690#FZC85#318829#Magnaporthe_oryzae#unaffected_pathogenicity	No definition line	64.7059
MHUMG1_35911	8	7.43659e-06	Q9A0G6#PHI:5069#GacA#1314#Streptococcus_pyogenes#lethal	No definition line	64.7059
MHUMG1_48421	272	3.90551e-140	I1RS48#PHI:1202#(Sc_Cla4)#5518#Fusarium_graminearum#reduced_virulence	No definition line	64.6688
MHUMG1_7261	8	0	I1RPU1#PHI:1297#GzAT001#5518#Fusarium_graminearum#reduced_virulence	No definition line	64.6288
MHUMG1_17511	16	0	I1RD69#PHI:1620#GzJUM002#5518#Fusarium_graminearum#unaffected_pathogenicity	No definition line	64.6252
MHUMG1_83091	10	0	I1RB03#PHI:7559#FgGT2#5518#Fusarium_graminearum#loss_of_pathogenicity	No definition line	64.6018
MHUMG1_6711	11	0	Q2KN79#PHI:522__PHI:2808#GAS1__gas1#5507#Fusarium_oxysporum#reduced_virulence	No definition line	64.5833
MHUMG1_92571	14	4.16486e-16	P95830#PHI:6986#DnaJ#1313#Streptococcus_pneumoniae#reduced_virulence	No definition line	64.5833
MHUMG1_9931	199	0	I1RG87#PHI:1358#GzC2H018#5518#Fusarium_graminearum#unaffected_pathogenicity	No definition line	64.5161
MHUMG1_86181	296	1.61255e-24	G4N2A1#PHI:5601#FZC11#318829#Magnaporthe_oryzae#unaffected_pathogenicity	No definition line	64.5161
MHUMG1_39171	86	1.2396e-21	I1RUC7#PHI:1260#FGSG_07816#5518#Fusarium_graminearum#unaffected_pathogenicity	No definition line	64.5161
MHUMG1_102451	9	0	I1RCK7#PHI:2294#FgFRP1#5518#Fusarium_graminearum#unaffected_pathogenicity__reduced_virulence	No definition line	64.5105
MHUMG1_34951	254	0	I1RP15#PHI:1252#FGSG_05764#5518#Fusarium_graminearum#unaffected_pathogenicity	No definition line	64.4928
MHUMG1_45501	14	0	Q4IB89#PHI:1224#FGSG_05519#5518#Fusarium_graminearum#lethal	No definition line	64.4119
MHUMG1_78491	32	0	I1RZD4#PHI:1413#GzC2H080#5518#Fusarium_graminearum#unaffected_pathogenicity	No definition line	64.4042
MHUMG1_89341	7	3.29461e-74	I1RE76#PHI:1571#GzOB011#5518#Fusarium_graminearum#unaffected_pathogenicity	No definition line	64.3275
MHUMG1_100001	10	0	I1RZZ3#PHI:2728#FgERG4#5518#Fusarium_graminearum#reduced_virulence	No definition line	64.3182
MHUMG1_67991	302	0	I1RAP1#PHI:1988#GzZC303#5518#Fusarium_graminearum#unaffected_pathogenicity	No definition line	64.3072
MHUMG1_30341	10	0	Q9C1T0#PHI:200#ARG1#5507#Fusarium_oxysporum#reduced_virulence	No definition line	64.2857
MHUMG1_35881	14	1.95801e-137	I1RSA6#PHI:1488#GzHMG020#5518#Fusarium_graminearum#unaffected_pathogenicity	No definition line	64.2857
MHUMG1_18671	7	5.06018e-78	Q4WJ77#PHI:7654#aroB#746128#Aspergillus_fumigatus#reduced_virulence	No definition line	64.2857
MHUMG1_94411	12	1.59845e-30	I1R9C8#PHI:8668#FgKP4L-3_(FGSG_00062)#5518#Fusarium_graminearum#reduced_virulence	No definition line	64.2857
MHUMG1_102751	22	5.00256e-17	C5P3X6#PHI:479#MEP1#199306#Coccidioides_posadasii#reduced_virulence	No definition line	64.2857
MHUMG1_67491	25	0	I1RAI5#PHI:1319#GzbZIP001#5518#Fusarium_graminearum#reduced_virulence	No definition line	64.2395
MHUMG1_76071	224	0	I1RCM6#PHI:1273#FGSG_01347#5518#Fusarium_graminearum#unaffected_pathogenicity	No definition line	64.2336
MHUMG1_44291	19	0	G2X6V8#PHI:6331#VdCYP1#27337#Verticillium_dahliae#loss_of_pathogenicity	No definition line	64.2276
MHUMG1_78151	12	3.50847e-119	Q4X1I3#PHI:2545#TIF35#746128#Aspergillus_fumigatus#lethal	No definition line	64.2105
MHUMG1_26241	260	0	I1RS33#PHI:1250#FGSG_06940#5518#Fusarium_graminearum#unaffected_pathogenicity	No definition line	64.2045
MHUMG1_26441	66	6.32543e-77	Q5AMP3#PHI:7011#arl1#5476#Candida_albicans#reduced_virulence	No definition line	64.1711
MHUMG1_40051	5	1.83343e-110	B3GXB6#PHI:7075#pdxS#715#Actinobacillus_pleuropneumoniae#reduced_virulence	No definition line	64.1379
MHUMG1_85861	5	1.83343e-110	B3GXB6#PHI:7075#pdxS#715#Actinobacillus_pleuropneumoniae#reduced_virulence	No definition line	64.1379
MHUMG1_25821	6	0	G4N549#PHI:7273#Pmp1#318829#Magnaporthe_oryzae#reduced_virulence__unaffected_pathogenicity	No definition line	64.1286
MHUMG1_11291	11	0	Q5XTQ5#PHI:538#FRT1#40559#Botrytis_cinerea#unaffected_pathogenicity	No definition line	64.0884
MHUMG1_43151	7	0	I1RX64#PHI:1407#GzC2H071#5518#Fusarium_graminearum#lethal	No definition line	64.0876
MHUMG1_21441	255	0	I1RRH8#PHI:1892#GzZC207#5518#Fusarium_graminearum#unaffected_pathogenicity	No definition line	64
MHUMG1_89571	8	9.17763e-104	I1RE92#PHI:1097#FGSG_01974#5518#Fusarium_graminearum#reduced_virulence	No definition line	64
MHUMG1_52411	261	9.37083e-98	I1RFK9#PHI:1269#FGSG_02488#5518#Fusarium_graminearum#unaffected_pathogenicity	No definition line	64
MHUMG1_100221	13	1.03885e-35	C5P3X6#PHI:479#MEP1#199306#Coccidioides_posadasii#reduced_virulence	No definition line	64
MHUMG1_105441	48	4.14977e-22	I1S8Y4#PHI:1338#GzbZIP020#5518#Fusarium_graminearum#unaffected_pathogenicity	No definition line	64
MHUMG1_28681	2	4.03481e-76	G4ND53#PHI:4084#MoPex19#318829#Magnaporthe_oryzae#loss_of_pathogenicity	No definition line	63.9831
MHUMG1_5421	31	4.1169e-155	A4QTE3#PHI:8927#MoSCAD1_(MGG_05096)#318829#Magnaporthe_oryzae#reduced_virulence__loss_of_pathogenicity	No definition line	63.964
MHUMG1_89851	7	3.1772e-82	I1RMV4#PHI:1464__PHI:8923#GzCCAAT004__FgHLTF1_(FGSG_05304)#5518#Fusarium_graminearum#reduced_virulence	No definition line	63.9594
MHUMG1_102961	4	0	C6ZRH8#PHI:2976#CgOPT1#474922#Colletotrichum_gloeosporioides#reduced_virulence	No definition line	63.939
MHUMG1_65261	8	2.79513e-06	Q4WUL6#PHI:362__PHI:2520#LYSF__LYS4#746128#Aspergillus_fumigatus#loss_of_pathogenicity__lethal	No definition line	63.8889
MHUMG1_72871	7	0	I1RTB9#PHI:1644#GzRFX1#5518#Fusarium_graminearum#unaffected_pathogenicity	No definition line	63.8441
MHUMG1_30621	60	1.60475e-107	T0LLS6#PHI:6703#CgRhoB#474922#Colletotrichum_gloeosporioides#reduced_virulence	No definition line	63.8132
MHUMG1_89681	36	0	P43098#PHI:96#FAS2#5476#Candida_albicans#loss_of_pathogenicity	No definition line	63.7895
MHUMG1_22451	8	1.19467e-29	I1RU55#PHI:1391#GzC2H054#5518#Fusarium_graminearum#unaffected_pathogenicity	No definition line	63.7363
MHUMG1_51661	14	1.21061e-169	P29138#PHI:4615#Pr1#5530#Metarhizium_anisopliae#unaffected_pathogenicity	No definition line	63.7143
MHUMG1_24881	13	6.69603e-63	I1RSY2#PHI:1588#GzOB028#5518#Fusarium_graminearum#lethal	No definition line	63.7037
MHUMG1_32361	5	2.89759e-76	Q96TN6#PHI:256#GAS1#318829#Magnaporthe_oryzae#reduced_virulence	No definition line	63.6816
MHUMG1_20121	145	0	I1RUB2#PHI:719#GzFUS1#5518#Fusarium_graminearum#unaffected_pathogenicity	No definition line	63.6364
MHUMG1_47101	35	5.03541e-130	W7N2C1#PHI:3384#FVEG_12530#117187#Fusarium_verticillioides#unaffected_pathogenicity	No definition line	63.6364
MHUMG1_4811	115	3.62136e-76	Q9C1I7#PHI:310#MgAtr4#1047171#Zymoseptoria_tritici#reduced_virulence	No definition line	63.6364
MHUMG1_50371	259	1.32748e-68	I1RKS9#PHI:1701#GzZC016#5518#Fusarium_graminearum#unaffected_pathogenicity	No definition line	63.6364
MHUMG1_78821	183	2.09374e-60	G4MVR0#PHI:5623#FZC29#318829#Magnaporthe_oryzae#unaffected_pathogenicity	No definition line	63.6364
MHUMG1_10181	10	3.46618e-50	Q8Y8N0#PHI:6510__PHI:7620#CshA__Lmo0866#1639#Listeria_monocytogenes#unaffected_pathogenicity__increased_virulence_(hypervirulence)	No definition line	63.6364
MHUMG1_33471	271	5.15146e-19	G4N134#PHI:5606#FZC15#318829#Magnaporthe_oryzae#unaffected_pathogenicity	No definition line	63.6364
MHUMG1_76931	5	1.36182e-15	Q945T9#PHI:653#GIP2#67593#Phytophthora_sojae#effector_(plant_avirulence_determinant)	No definition line	63.6364
MHUMG1_11591	12	2.32121e-06	A8YPQ5#PHI:7004#CapB2#1280#Staphylococcus_aureus#reduced_virulence	No definition line	63.6364
MHUMG1_42581	133	0	G5EI34#PHI:3019#MoLys2#318829#Magnaporthe_oryzae#reduced_virulence	No definition line	63.6052
MHUMG1_37361	13	0	I1RCP1#PHI:1080#Cch1#5518#Fusarium_graminearum#unaffected_pathogenicity	No definition line	63.5934
MHUMG1_20831	4	2.08266e-170	M1RXP4#PHI:4165#ALG3#318829#Magnaporthe_oryzae#reduced_virulence	No definition line	63.5897
MHUMG1_3911	41	7.43198e-174	I1RZX9#PHI:1014#GzGPA3#5518#Fusarium_graminearum#unaffected_pathogenicity	No definition line	63.5593
MHUMG1_86941	57	2.28521e-62	Q9UW03#PHI:202__PHI:1160__PHI:2309#BcatrB#40559#Botrytis_cinerea#unaffected_pathogenicity__reduced_virulence__chemistry_target:_sensitivity_to_chemical	No definition line	63.5135
MHUMG1_83421	5	3.53038e-157	G4N6Q1#PHI:2074#Moatg6#318829#Magnaporthe_oryzae#loss_of_pathogenicity	No definition line	63.4328
MHUMG1_76831	5	1.3827e-71	Q70ZY8#PHI:2524#nudC#746128#Aspergillus_fumigatus#lethal	No definition line	63.4146
MHUMG1_20971	5	1.87075e-42	Q9P470#PHI:257#GAS2#318829#Magnaporthe_oryzae#reduced_virulence	No definition line	63.4146
MHUMG1_17661	6	7.73248e-140	N4VSY8#PHI:5111#FAM1#5465#Colletotrichum_orbiculare#loss_of_pathogenicity	No definition line	63.3252
MHUMG1_27211	10	0	I1RRU8#PHI:1622#GzJUM004#5518#Fusarium_graminearum#unaffected_pathogenicity	No definition line	63.2444
MHUMG1_21321	96	1.49112e-170	Q4X1Y0#PHI:2514#PFS2#746128#Aspergillus_fumigatus#lethal	No definition line	63.198
MHUMG1_82131	10	2.16166e-110	O93852#PHI:197#ALO1#5476#Candida_albicans#reduced_virulence	No definition line	63.1579
MHUMG1_31221	6	5.45302e-89	W7MNK7#PHI:7147#FvPEX14#117187#Fusarium_verticillioides#unaffected_pathogenicity	No definition line	63.1579
MHUMG1_35501	34	5.09336e-51	I1RC95#PHI:1566#GzOB006#5518#Fusarium_graminearum#lethal	No definition line	63.1579
MHUMG1_13331	5	5.69148e-43	B2SI02#PHI:1139#raxQ#347#Xanthomonas_oryzae#increased_virulence_(hypervirulence)	No definition line	63.1579
MHUMG1_30321	26	1.48145e-42	A0A075TRB3#PHI:3301#patN#27334#Penicillium_expansum#unaffected_pathogenicity	No definition line	63.1579
MHUMG1_103501	43	2.99476e-13	I1RUC7#PHI:1260#FGSG_07816#5518#Fusarium_graminearum#unaffected_pathogenicity	No definition line	63.1579
MHUMG1_6691	93	1.55926e-11	W9B5Y9#PHI:7541#FepC_(VK055_1930)#573#Klebsiella_pneumoniae#reduced_virulence	No definition line	63.1579
MHUMG1_37821	8	2.81123e-11	E9DS54#PHI:8769#MaPpt1#92637#Metarhizium_acridum#unaffected_pathogenicity	No definition line	63.1579
MHUMG1_56531	106	6.27724e-11	B2SRG1#PHI:1141#raxB#347#Xanthomonas_oryzae#increased_virulence_(hypervirulence)	No definition line	63.1579
MHUMG1_32561	39	4.80606e-114	G4MWK9#PHI:8929#MoSCAD3_(MGG_01180)#318829#Magnaporthe_oryzae#reduced_virulence	No definition line	63.1179
MHUMG1_18001	2	1.60379e-32	Q4HTT1#PHI:1468#GzCCAAT008#5518#Fusarium_graminearum#unaffected_pathogenicity	No definition line	63
MHUMG1_55391	21	0	I1S282#PHI:1452#GzHSF003#5518#Fusarium_graminearum#unaffected_pathogenicity	No definition line	62.9964
MHUMG1_16881	12	6.14609e-159	I1RCX3#PHI:1540#GzMyb004#5518#Fusarium_graminearum#unaffected_pathogenicity	No definition line	62.987
MHUMG1_94871	303	9.09829e-174	I1R9R2#PHI:1996#GzZC311#5518#Fusarium_graminearum#unaffected_pathogenicity	No definition line	62.963
MHUMG1_73761	22	3.15954e-23	G4N3J5#PHI:5306#MoSKP1#318829#Magnaporthe_oryzae#loss_of_pathogenicity	No definition line	62.963
MHUMG1_66811	18	9.537e-112	G4MU60#PHI:6615#Mocapn4#318829#Magnaporthe_oryzae#reduced_virulence	No definition line	62.8975
MHUMG1_70971	8	2.13881e-89	G4NCG1#PHI:3234#MoLYS20#318829#Magnaporthe_oryzae#reduced_virulence	No definition line	62.8959
MHUMG1_68061	6	0	G4MKY1#PHI:7991#PoVps9_(MGG_05379)__PoVps9#318829#Magnaporthe_oryzae#reduced_virulence__loss_of_pathogenicity	No definition line	62.8453
MHUMG1_5541	104	0	W5ZQ93#PHI:3417#Ohmm#176275#Beauveria_bassiana#increased_virulence_(hypervirulence)	No definition line	62.8116
MHUMG1_12901	50	0	I1RWW4#PHI:1331__PHI:3111__PHI:4023#GzbZIP013__FgAP1__Fgap1#5518#Fusarium_graminearum#unaffected_pathogenicity	No definition line	62.7986
MHUMG1_75331	279	0	I1RY79#PHI:1943#GzZC258#5518#Fusarium_graminearum#unaffected_pathogenicity	No definition line	62.7962
MHUMG1_9251	3	0	E3QI05#PHI:6826#GAA1#31870#Colletotrichum_graminicola#loss_of_pathogenicity	No definition line	62.7572
MHUMG1_3051	8	2.87893e-121	N4X9G3#PHI:4233#ftr1#5016#Bipolaris_maydis#reduced_virulence	No definition line	62.6582
MHUMG1_49651	41	3.57676e-48	I1RGC9#PHI:1359#GzC2H019#5518#Fusarium_graminearum#unaffected_pathogenicity	No definition line	62.6437
MHUMG1_15891	14	0	I1RN13#PHI:1010#SID1#5518#Fusarium_graminearum#reduced_virulence	No definition line	62.6168
MHUMG1_12361	29	2.76559e-177	I1RVY6#PHI:1401#GzC2H064#5518#Fusarium_graminearum#unaffected_pathogenicity	No definition line	62.6126
MHUMG1_13251	12	3.77279e-170	W7LS89#PHI:6262#FUG1#117187#Fusarium_verticillioides#reduced_virulence	No definition line	62.6087
MHUMG1_54561	14	0	X0I5S4#PHI:6530#gas1#5507#Fusarium_oxysporum#reduced_virulence	No definition line	62.6068
MHUMG1_81741	10	0	Q4I2M7#PHI:1676#GzDHHC004#5518#Fusarium_graminearum#unaffected_pathogenicity	No definition line	62.5966
MHUMG1_15281	23	3.58291e-71	J5JHE8#PHI:7377#Blys4#176275#Beauveria_bassiana#unaffected_pathogenicity	No definition line	62.5731
MHUMG1_27051	205	0	I1RRX1#PHI:1382#GzC2H045#5518#Fusarium_graminearum#reduced_virulence	No definition line	62.5
MHUMG1_58671	45	0	I1S0C1#PHI:1668#GzCCHC008#5518#Fusarium_graminearum#unaffected_pathogenicity	No definition line	62.5
MHUMG1_94181	49	0	Q9C2Y4#PHI:405#PDE1#318829#Magnaporthe_oryzae#reduced_virulence	No definition line	62.5
MHUMG1_28111	257	8.56669e-157	I1S0N2#PHI:1849#GzZC164#5518#Fusarium_graminearum#unaffected_pathogenicity	No definition line	62.5
MHUMG1_79441	4	7.41582e-133	I1RMP0#PHI:1485#GzHMG017#5518#Fusarium_graminearum#unaffected_pathogenicity	No definition line	62.5
MHUMG1_54751	258	4.07237e-88	I1S2A9#PHI:1784#GzZC099#5518#Fusarium_graminearum#unaffected_pathogenicity	No definition line	62.5
MHUMG1_88931	14	5.78056e-40	Q5K8R6#PHI:2822#Cxt1p#5207#Cryptococcus_neoformans#reduced_virulence	No definition line	62.5
MHUMG1_67181	246	5.18245e-39	F5B5Y4#PHI:6206#BbCypC#176275#Beauveria_bassiana#unaffected_pathogenicity	No definition line	62.5
MHUMG1_11051	20	1.55076e-35	Q2KNE4#PHI:3881#LaeA#5059#Aspergillus_flavus#reduced_virulence	No definition line	62.5
MHUMG1_251	60	8.2594e-25	I1RUC7#PHI:1260#FGSG_07816#5518#Fusarium_graminearum#unaffected_pathogenicity	No definition line	62.5
MHUMG1_69521	4	2.52419e-19	K8DPN9#PHI:4584#FkpA#535744#Cronobacter_universalis#reduced_virulence	No definition line	62.5
MHUMG1_5601	231	8.91367e-14	I1RDH3#PHI:1952#GzZC267#5518#Fusarium_graminearum#unaffected_pathogenicity	No definition line	62.5
MHUMG1_88521	15	1.41474e-10	I1RAW4#PHI:7193#FgLaeA#5518#Fusarium_graminearum#reduced_virulence	No definition line	62.5
MHUMG1_93801	8	1.1046e-09	P06618#PHI:4171#iaaH-1#29438#Pseudomonas_savastanoi#reduced_virulence	No definition line	62.5
MHUMG1_23481	8	1.27269e-09	A0A0P9Y928#PHI:6650#iaaL#29438#Pseudomonas_savastanoi#increased_virulence_(hypervirulence)	No definition line	62.5
MHUMG1_11861	7	0	I1RW28#PHI:1646#GzWing018#5518#Fusarium_graminearum#reduced_virulence	No definition line	62.4511
MHUMG1_12741	9	1.1972e-104	M7THD3#PHI:6627#BcCPA1#40559#Botrytis_cinerea#reduced_virulence	No definition line	62.4506
MHUMG1_85001	11	9.48437e-90	S0E3H0#PHI:3210#FfSge1#5127#Fusarium_fujikuroi#unaffected_pathogenicity	No definition line	62.4434
MHUMG1_45911	6	1.95519e-143	I1RNJ6#PHI:5784#Fgsg05579#5518#Fusarium_graminearum#unaffected_pathogenicity	No definition line	62.4309
MHUMG1_15971	65	0	Q9C1I7#PHI:310#MgAtr4#1047171#Zymoseptoria_tritici#reduced_virulence	No definition line	62.4152
MHUMG1_11831	46	2.67588e-130	A0A1C3YKC6#PHI:5871#Fgsg11080#5518#Fusarium_graminearum#unaffected_pathogenicity	No definition line	62.3955
MHUMG1_30571	3	1.57792e-87	G4NCA2#PHI:2016#PTH2#318829#Magnaporthe_oryzae#loss_of_pathogenicity	No definition line	62.3932
MHUMG1_42751	251	2.24733e-115	I1RWQ2#PHI:1235#FGSG_08731#5518#Fusarium_graminearum#lethal	No definition line	62.3616
MHUMG1_7901	7	0	G4MRB4#PHI:4491#SHM#318829#Magnaporthe_oryzae#reduced_virulence	No definition line	62.3431
MHUMG1_42451	6	0	J4US35#PHI:8673#cryD_(EJP68422)#176275#Beauveria_bassiana#unaffected_pathogenicity	No definition line	62.2744
MHUMG1_12561	20	0	G4NB40#PHI:5033#MoSRE1#318829#Magnaporthe_oryzae#unaffected_pathogenicity	No definition line	62.2642
MHUMG1_60631	19	1.16917e-55	A0A0G4J7R2#PHI:7735#PbCYP3#318829#Magnaporthe_oryzae#reduced_virulence	No definition line	62.2642
MHUMG1_101781	3	1.61205e-35	I1RCG0#PHI:1539#GzMyb003#5518#Fusarium_graminearum#unaffected_pathogenicity	No definition line	62.2642
MHUMG1_2961	305	0	I1RMG7#PHI:1954#GzZC269#5518#Fusarium_graminearum#unaffected_pathogenicity	No definition line	62.1622
MHUMG1_21281	354	0	I1RRG4#PHI:1380#GzC2H043#5518#Fusarium_graminearum#unaffected_pathogenicity	No definition line	62.1339
MHUMG1_521	11	0	I1S368#PHI:6127#PLC#5518#Fusarium_graminearum#unaffected_pathogenicity	No definition line	62.1087
MHUMG1_55801	2	1.96356e-95	F9XNZ8#PHI:8592#ZtPpt#1047171#Zymoseptoria_tritici#loss_of_pathogenicity	No definition line	62.069
MHUMG1_67961	11	3.94979e-70	I1RAN6#PHI:1768#GzZC083#5518#Fusarium_graminearum#unaffected_pathogenicity	No definition line	62.069
MHUMG1_2651	8	1.24451e-62	I1R9Z0#PHI:1469#GzHMG001#5518#Fusarium_graminearum#unaffected_pathogenicity	No definition line	62.069
MHUMG1_90081	31	6.24603e-46	L2G011#PHI:3973#ASP#474922#Colletotrichum_gloeosporioides#reduced_virulence	No definition line	62.069
MHUMG1_103321	9	8.8132e-92	G4NGW7#PHI:3067#MoRga7#318829#Magnaporthe_oryzae#unaffected_pathogenicity	No definition line	62.0438
MHUMG1_46651	11	0	Q8J0H8#PHI:7228#tre1#318829#Magnaporthe_oryzae#unaffected_pathogenicity	No definition line	62.0272
MHUMG1_29871	32	2.178e-29	G4MZ98#PHI:5186#MoAPX2#318829#Magnaporthe_oryzae#reduced_virulence	No definition line	61.9565
MHUMG1_21071	33	7.43318e-138	J9MHC1#PHI:1103__PHI:2282#FOXG_02277__MeaB#5507#Fusarium_oxysporum#unaffected_pathogenicity__increased_virulence_(hypervirulence)	No definition line	61.9171
MHUMG1_48811	279	2.1131e-163	I1RXK9#PHI:1850#GzZC165#5518#Fusarium_graminearum#unaffected_pathogenicity	No definition line	61.9048
MHUMG1_41401	22	2.08659e-120	Q4WWT7#PHI:4896#aspE#746128#Aspergillus_fumigatus#unaffected_pathogenicity	No definition line	61.9048
MHUMG1_48321	10	1.03801e-59	P29138#PHI:4615#Pr1#5530#Metarhizium_anisopliae#unaffected_pathogenicity	No definition line	61.9048
MHUMG1_27311	10	2.5152e-42	Q5KN74#PHI:7207#msh2#5207#Cryptococcus_neoformans#unaffected_pathogenicity	No definition line	61.9048
MHUMG1_23011	32	2.00946e-36	Q5EMY3#PHI:860#MSP1#318829#Magnaporthe_oryzae#reduced_virulence	No definition line	61.9048
MHUMG1_88091	6	3.46165e-36	Q4U4T0#PHI:2388#Chi2#5530#Metarhizium_anisopliae#increased_virulence_(hypervirulence)__reduced_virulence	No definition line	61.9048
MHUMG1_68101	80	3.16571e-33	G4MNN4#PHI:3314#cca1#318829#Magnaporthe_oryzae#loss_of_pathogenicity	No definition line	61.9048
MHUMG1_83461	48	9.53529e-09	Q4X1Y0#PHI:2514#PFS2#746128#Aspergillus_fumigatus#lethal	No definition line	61.9048
MHUMG1_49191	3	5.57753e-07	I1R983#PHI:1992#GzZC307#5518#Fusarium_graminearum#unaffected_pathogenicity	No definition line	61.9048
MHUMG1_24941	6	0	Q4W9S1#PHI:6557#cysB#746128#Aspergillus_fumigatus#unaffected_pathogenicity__reduced_virulence	No definition line	61.8861
MHUMG1_81141	129	1.29874e-113	I1R9K8#PHI:1717#GzZC032#5518#Fusarium_graminearum#unaffected_pathogenicity	No definition line	61.8519
MHUMG1_20751	8	0	J5JDI1#PHI:3095#Ktr1#176275#Beauveria_bassiana#unaffected_pathogenicity	No definition line	61.8056
MHUMG1_7531	268	6.03084e-10	I1S4B9#PHI:1738#GzZC053#5518#Fusarium_graminearum#unaffected_pathogenicity	No definition line	61.7647
MHUMG1_98631	138	0	E2EAF6#PHI:2357#CYP52X1#176275#Beauveria_bassiana#reduced_virulence	No definition line	61.753
MHUMG1_23451	5	3.26362e-11	I1RX03#PHI:3985#FGSG_08844_(Sc_gpi7)#5518#Fusarium_graminearum#unaffected_pathogenicity	No definition line	61.6667
MHUMG1_27281	16	0	D9J222#PHI:2453#Snt2#5507#Fusarium_oxysporum#reduced_virulence	No definition line	61.544
MHUMG1_30871	5	0	G4MPB7#PHI:4495#Bud6p#318829#Magnaporthe_oryzae#unaffected_pathogenicity	No definition line	61.5385
MHUMG1_87761	16	8.35344e-146	G4NJH9#PHI:6639#Modnm3#318829#Magnaporthe_oryzae#unaffected_pathogenicity	No definition line	61.5385
MHUMG1_109741	252	1.53879e-109	I1RUV3#PHI:1861#GzZC176#5518#Fusarium_graminearum#unaffected_pathogenicity	No definition line	61.5385
MHUMG1_63661	8	4.24961e-18	Q9UUS8#PHI:167#CHIP3#474922#Colletotrichum_gloeosporioides#unaffected_pathogenicity	No definition line	61.5385
MHUMG1_47041	44	1.17017e-15	I1RUC7#PHI:1260#FGSG_07816#5518#Fusarium_graminearum#unaffected_pathogenicity	No definition line	61.5385
MHUMG1_23991	244	1.29166e-14	I1RIA7#PHI:2328#TRI10#5518#Fusarium_graminearum#reduced_virulence	No definition line	61.5385
MHUMG1_35191	8	0	I1RX22#PHI:1595#GzOB035#5518#Fusarium_graminearum#unaffected_pathogenicity	No definition line	61.5094
MHUMG1_80791	14	0	I1RPD3#PHI:6719#FgPLC1#5518#Fusarium_graminearum#reduced_virulence	No definition line	61.4978
MHUMG1_100631	4	0	G4N5E4#PHI:2060#MgLig4#318829#Magnaporthe_oryzae#unaffected_pathogenicity	No definition line	61.4314
MHUMG1_69571	6	0	H1VQ06#PHI:8878#ChBUB2_(XP_018164413)#80884#Colletotrichum_higginsianum#reduced_virulence	No definition line	61.4155
MHUMG1_90941	3	1.21833e-122	Q4WVS3#PHI:7652#aroC#746128#Aspergillus_fumigatus#reduced_virulence	No definition line	61.3793
MHUMG1_55701	6	0	Q4X0J6#PHI:2517#TRPS#746128#Aspergillus_fumigatus#lethal	No definition line	61.3402
MHUMG1_28541	310	0	I1RZR8#PHI:1752#GzZC067#5518#Fusarium_graminearum#unaffected_pathogenicity	No definition line	61.3048
MHUMG1_26201	10	0	I1RS37#PHI:1643#GzWing015#5518#Fusarium_graminearum#reduced_virulence	No definition line	61.3032
MHUMG1_97581	262	0	I1RSP9#PHI:1798#GzZC113#5518#Fusarium_graminearum#unaffected_pathogenicity	No definition line	61.2903
MHUMG1_73901	5	2.24843e-128	Q4U4T0#PHI:2388#Chi2#5530#Metarhizium_anisopliae#increased_virulence_(hypervirulence)__reduced_virulence	No definition line	61.2903
MHUMG1_79951	4	1.27267e-63	G2XE04#PHI:7873#VdSec22#27337#Verticillium_dahliae#reduced_virulence	No definition line	61.2245
MHUMG1_90131	6	5.71269e-23	Q8J1W4#PHI:291#CPPH1#5111#Claviceps_purpurea#unaffected_pathogenicity	No definition line	61.194
MHUMG1_63111	63	5.88809e-152	I1S3J8#PHI:5800#Fgsg11385#5518#Fusarium_graminearum#unaffected_pathogenicity	No definition line	61.1898
MHUMG1_83181	3	1.02455e-59	I1RAZ9#PHI:1472#GzHMG004#5518#Fusarium_graminearum#unaffected_pathogenicity	No definition line	61.1842
MHUMG1_3281	26	1.01933e-99	I1RMI1#PHI:1325#GzbZIP007#5518#Fusarium_graminearum#reduced_virulence	No definition line	61.1321
MHUMG1_32181	401	0	I1RLM4#PHI:1977#GzZC292#5518#Fusarium_graminearum#unaffected_pathogenicity	No definition line	61.1111
MHUMG1_75281	286	0	I1RLS0#PHI:1957#GzZC272#5518#Fusarium_graminearum#unaffected_pathogenicity	No definition line	61.1111
MHUMG1_94111	160	0	I1RXE8#PHI:1763#GzZC078#5518#Fusarium_graminearum#unaffected_pathogenicity	No definition line	61.1111
MHUMG1_74671	150	6.94215e-162	I1RMZ4#PHI:1938#GzZC253#5518#Fusarium_graminearum#unaffected_pathogenicity	No definition line	61.1111
MHUMG1_1231	19	3.45343e-100	Q4W9X3#PHI:3275#fhpA#746128#Aspergillus_fumigatus#unaffected_pathogenicity	No definition line	61.1111
MHUMG1_5481	67	4.11836e-97	I1RM58#PHI:5851#Fgsg05039#5518#Fusarium_graminearum#unaffected_pathogenicity	No definition line	61.1111
MHUMG1_63461	270	1.16836e-78	I1RHH3#PHI:1908#GzZC223#5518#Fusarium_graminearum#unaffected_pathogenicity	No definition line	61.1111
MHUMG1_88901	131	2.67894e-74	G5EI34#PHI:3019#MoLys2#318829#Magnaporthe_oryzae#reduced_virulence	No definition line	61.1111
MHUMG1_60551	5	4.96469e-62	G4N1N6#PHI:5191#TPX1#318829#Magnaporthe_oryzae#reduced_virulence	No definition line	61.1111
MHUMG1_22471	8	4.56423e-47	C5P3X6#PHI:479#MEP1#199306#Coccidioides_posadasii#reduced_virulence	No definition line	61.1111
MHUMG1_46111	72	8.78019e-47	Q9UW03#PHI:202__PHI:1160__PHI:2309#BcatrB#40559#Botrytis_cinerea#unaffected_pathogenicity__reduced_virulence__chemistry_target:_sensitivity_to_chemical	No definition line	61.1111
MHUMG1_110141	14	1.52578e-30	Q5A2T6#PHI:513#ARN1_(SIT1)#5476#Candida_albicans#unaffected_pathogenicity__reduced_virulence	No definition line	61.1111
MHUMG1_74281	7	1.73358e-30	C5P3X6#PHI:479#MEP1#199306#Coccidioides_posadasii#reduced_virulence	No definition line	61.1111
MHUMG1_79961	188	2.88173e-29	I1R9J1#PHI:1271#FGSG_00132#5518#Fusarium_graminearum#unaffected_pathogenicity	No definition line	61.1111
MHUMG1_69791	57	1.92715e-27	G4MYS1#PHI:4736#MoYpt7#318829#Magnaporthe_oryzae#loss_of_pathogenicity	No definition line	61.1111
MHUMG1_99801	10	5.21896e-23	A0A0H3KBS1#PHI:7917#NWMN_0826#1280#Staphylococcus_aureus#reduced_virulence	No definition line	61.1111
MHUMG1_18901	264	7.86094e-22	I1RH59#PHI:1925#GzZC240#5518#Fusarium_graminearum#unaffected_pathogenicity	No definition line	61.1111
MHUMG1_7541	5	3.38855e-18	P06618#PHI:4171#iaaH-1#29438#Pseudomonas_savastanoi#reduced_virulence	No definition line	61.1111
MHUMG1_78511	27	1.78155e-17	I1S2J3#PHI:9041#fgm9_(FGSG_10989)#5518#Fusarium_graminearum#reduced_virulence	No definition line	61.1111
MHUMG1_2561	48	1.63406e-16	I1REA6#PHI:5822#Fgsg01989#5518#Fusarium_graminearum#unaffected_pathogenicity	No definition line	61.1111
MHUMG1_20651	6	4.37235e-13	E9DS54#PHI:8769#MaPpt1#92637#Metarhizium_acridum#unaffected_pathogenicity	No definition line	61.1111
MHUMG1_86231	81	1.12509e-11	Q9I4X3#PHI:3291__PHI:5563__PHI:5585#pqsA#287#Pseudomonas_aeruginosa#reduced_virulence	No definition line	61.1111
MHUMG1_66871	51	2.24478e-09	A4RJV3#PHI:6135__PHI:6636#PEF1__MoMdv1#318829#Magnaporthe_oryzae#reduced_virulence	No definition line	61.1111
MHUMG1_43901	13	2.5851e-08	P39827#PHI:281#CDC10#5476#Candida_albicans#reduced_virulence	No definition line	61.1111
MHUMG1_22671	10	4.0141e-07	Q887P8#PHI:7031#algD#317#Pseudomonas_syringae#unaffected_pathogenicity	No definition line	61.1111
MHUMG1_95421	77	0	O60034#PHI:1030#bcatrA#40559#Botrytis_cinerea#unaffected_pathogenicity	No definition line	61.0656
MHUMG1_80521	40	5.47139e-110	I1RUF1#PHI:5843#Fgsg07841#5518#Fusarium_graminearum#unaffected_pathogenicity	No definition line	61.0644
MHUMG1_66701	255	0	I1RAA6#PHI:1256#FGSG_00433#5518#Fusarium_graminearum#unaffected_pathogenicity	No definition line	61.0509
MHUMG1_40531	258	0	I1S4P4#PHI:1217#FGSG_00792#5518#Fusarium_graminearum#reduced_virulence	No definition line	60.9922
MHUMG1_58191	3	0	Q4HY90#PHI:1525#GzHOMEL035#5518#Fusarium_graminearum#unaffected_pathogenicity	No definition line	60.9538
MHUMG1_20921	5	3.08716e-170	I1RMT5#PHI:1294#GzAPSES002#5518#Fusarium_graminearum#unaffected_pathogenicity	No definition line	60.9302
MHUMG1_42331	309	2.21938e-56	I1RH93#PHI:1924#GzZC239#5518#Fusarium_graminearum#unaffected_pathogenicity	No definition line	60.8696
MHUMG1_109241	226	1.08968e-23	G4NFM3#PHI:5609#FZC18#318829#Magnaporthe_oryzae#unaffected_pathogenicity	No definition line	60.8696
MHUMG1_81321	82	1.68037e-18	I1S3J7#PHI:1424#GzC2H092#5518#Fusarium_graminearum#unaffected_pathogenicity	No definition line	60.8696
MHUMG1_94691	280	4.7469e-13	Q0WXM3#PHI:734#FOW2#5507#Fusarium_oxysporum#loss_of_pathogenicity	No definition line	60.8696
MHUMG1_101561	6	5.96438e-10	B7VSJ8#PHI:3018#Vsp#212663#Vibrio_tasmaniensis#reduced_virulence	No definition line	60.8696
MHUMG1_31871	9	0	Q522W5#PHI:2086#Moatg24#318829#Magnaporthe_oryzae#unaffected_pathogenicity	No definition line	60.8519
MHUMG1_59251	259	0	I1S077#PHI:1210#FGSG_10095#5518#Fusarium_graminearum#reduced_virulence	No definition line	60.8196
MHUMG1_66161	7	0	I1RA50#PHI:1453#GzAra001#5518#Fusarium_graminearum#lethal	No definition line	60.8069
MHUMG1_16071	10	4.64133e-81	I1RAW2#PHI:1345#GzC2H005#5518#Fusarium_graminearum#unaffected_pathogenicity	No definition line	60.804
MHUMG1_58091	122	0	I1S042#PHI:1090__PHI:1163__PHI:3893#FGSG_10057__ERB1__FgEBR1#5518#Fusarium_graminearum#reduced_virulence	No definition line	60.7882
MHUMG1_50751	5	1.88959e-127	Q4U4T0#PHI:2388#Chi2#5530#Metarhizium_anisopliae#increased_virulence_(hypervirulence)__reduced_virulence	No definition line	60.7717
MHUMG1_45871	4	1.49063e-73	I1RTF5#PHI:1532#GzLam001#5518#Fusarium_graminearum#unaffected_pathogenicity	No definition line	60.7595
MHUMG1_80231	16	1.16172e-57	G5EH72#PHI:5233#MoARG5_6#318829#Magnaporthe_oryzae#loss_of_pathogenicity	No definition line	60.7595
MHUMG1_26861	133	0	Q3Y5V5#PHI:1018__PHI:2042#ABC3#318829#Magnaporthe_oryzae#loss_of_pathogenicity	No definition line	60.7143
MHUMG1_44761	279	0	I1S7B9#PHI:1739#GzZC054#5518#Fusarium_graminearum#unaffected_pathogenicity	No definition line	60.7143
MHUMG1_14051	22	1.33207e-46	I1RY71#PHI:1313#GzbHLH014#5518#Fusarium_graminearum#unaffected_pathogenicity	No definition line	60.7143
MHUMG1_105061	268	4.36177e-16	I1RDP6#PHI:1950#GzZC265#5518#Fusarium_graminearum#unaffected_pathogenicity	No definition line	60.7143
MHUMG1_12631	5	0	I1RVV2#PHI:1611#GzP53L004#5518#Fusarium_graminearum#unaffected_pathogenicity	No definition line	60.6557
MHUMG1_26511	5	3.51167e-43	I1RS06#PHI:1665#GzCCHC005#5518#Fusarium_graminearum#unaffected_pathogenicity	No definition line	60.6299
MHUMG1_18661	316	0	I1RDE2#PHI:1960#GzZC275#5518#Fusarium_graminearum#unaffected_pathogenicity	No definition line	60.6061
MHUMG1_100841	256	1.33335e-83	I1RNU2#PHI:1895#GzZC210#5518#Fusarium_graminearum#unaffected_pathogenicity	No definition line	60.6061
MHUMG1_121	37	5.97814e-120	Q32WF7#PHI:2269#Mdh1#13684#Parastagonospora_nodorum#unaffected_pathogenicity	No definition line	60.5263
MHUMG1_100011	260	3.92995e-35	I1RH59#PHI:1925#GzZC240#5518#Fusarium_graminearum#unaffected_pathogenicity	No definition line	60.5263
MHUMG1_94651	5	1.64824e-70	Q4WES1#PHI:2550#NOB1#746128#Aspergillus_fumigatus#lethal	No definition line	60.5042
MHUMG1_84441	10	6.45042e-158	I1RBK8#PHI:1619#GzJUM001#5518#Fusarium_graminearum#unaffected_pathogenicity	No definition line	60.4222
MHUMG1_4241	21	0	G4N2X9#PHI:5189#MoLDS1#318829#Magnaporthe_oryzae#reduced_virulence	No definition line	60.386
MHUMG1_30981	7	4.27552e-115	I1RKF3#PHI:2418__PHI:2419#CID1#5518#Fusarium_graminearum#reduced_virulence	No definition line	60.3715
MHUMG1_85961	3	0	I1RFP4#PHI:1441#GzDDT#5518#Fusarium_graminearum#reduced_virulence	No definition line	60.3175
MHUMG1_2301	25	0	I1RA15#PHI:446__PHI:2348#TBL1__FTL1_(TBL1)#5518#Fusarium_graminearum#reduced_virulence	No definition line	60.1626
MHUMG1_55911	19	0	I1S1U7#PHI:2352__PHI:2354#AMT2#5518#Fusarium_graminearum#unaffected_pathogenicity__reduced_virulence	No definition line	60.1533
MHUMG1_101221	8	1.93324e-160	Q4WCZ1#PHI:2969#argEF#746128#Aspergillus_fumigatus#reduced_virulence	No definition line	60.095
MHUMG1_18131	9	0	Q4WUL6#PHI:362__PHI:2520#LYSF__LYS4#746128#Aspergillus_fumigatus#loss_of_pathogenicity__lethal	No definition line	60.0563
MHUMG1_12241	45	0	G4NCS2#PHI:6780#MoCreC#318829#Magnaporthe_oryzae#reduced_virulence	No definition line	60.0355
MHUMG1_79361	23	0	I1RQ92#PHI:1487#GzHMG019#5518#Fusarium_graminearum#unaffected_pathogenicity	No definition line	60.0252
MHUMG1_21381	16	0	G4N054#PHI:2018__PHI:2106#MoPLC2__MGG_05332.5#318829#Magnaporthe_oryzae#loss_of_pathogenicity__reduced_virulence	No definition line	60
MHUMG1_97161	315	0	I1RSR7#PHI:1796#GzZC111#5518#Fusarium_graminearum#unaffected_pathogenicity	No definition line	60
MHUMG1_98001	85	0	I1S2J9#PHI:3924__PHI:8224__PHI:9036#FgABC1__Fg10995__fgm5_(FGSG_10995)#5518#Fusarium_graminearum#reduced_virulence	No definition line	60
MHUMG1_105171	131	9.86664e-164	Q8XQ67#PHI:7323#ralA#305#Ralstonia_solanacearum#loss_of_pathogenicity	No definition line	60
MHUMG1_23591	270	5.25999e-101	I1S0X3#PHI:1776#GzZC091#5518#Fusarium_graminearum#unaffected_pathogenicity	No definition line	60
MHUMG1_49081	32	1.29053e-65	I1RI51#PHI:5792#Fgsg03476#5518#Fusarium_graminearum#unaffected_pathogenicity	No definition line	60
MHUMG1_99281	73	1.74068e-64	Q9UW87#PHI:267#MLT1#5476#Candida_albicans#reduced_virulence	No definition line	60
MHUMG1_100911	15	2.53947e-60	E9R863#PHI:5267#UgeB#162425#Aspergillus_nidulans#increased_virulence_(hypervirulence)	No definition line	60
MHUMG1_48411	27	1.47676e-55	Q0U2A0#PHI:2255#Abd1#13684#Parastagonospora_nodorum#unaffected_pathogenicity	No definition line	60
MHUMG1_67201	12	1.71027e-54	I1R9K2#PHI:8645#FgLDHL1_(FGSG_00145)#5518#Fusarium_graminearum#reduced_virulence	No definition line	60
MHUMG1_91181	77	4.81689e-53	I1RFK9#PHI:1269#FGSG_02488#5518#Fusarium_graminearum#unaffected_pathogenicity	No definition line	60
MHUMG1_48451	9	4.29559e-45	O93806#PHI:174#GNA1#5476#Candida_albicans#reduced_virulence	No definition line	60
MHUMG1_77361	131	1.4123e-37	G4MYQ4#PHI:5608#FZC17#318829#Magnaporthe_oryzae#unaffected_pathogenicity	No definition line	60
MHUMG1_31351	39	3.93854e-35	G4N134#PHI:5606#FZC15#318829#Magnaporthe_oryzae#unaffected_pathogenicity	No definition line	60
MHUMG1_38341	9	7.1594e-32	I1RFD7#PHI:1969#GzZC284#5518#Fusarium_graminearum#unaffected_pathogenicity	No definition line	60
MHUMG1_96621	11	1.76625e-30	I1REJ1#PHI:1662#GzCCHC002#5518#Fusarium_graminearum#unaffected_pathogenicity	No definition line	60
MHUMG1_42291	9	1.76504e-26	I1RG88#PHI:7649#FgPR-IL-2#5518#Fusarium_graminearum#unaffected_pathogenicity	No definition line	60
MHUMG1_44531	8	3.68308e-26	Q8IEJ6#PHI:3101#BCKDH#5833#Plasmodium_falciparum#reduced_virulence	No definition line	60
MHUMG1_70131	20	2.21373e-24	A5IYL7#PHI:6517#adhT#2110#Mycoplasma_agalactiae#reduced_virulence	No definition line	60
MHUMG1_97941	93	4.06841e-24	Q2I0M6#PHI:1051#CTB3#29003#Cercospora_nicotianae#reduced_virulence	No definition line	60
MHUMG1_99581	9	2.84217e-21	O93806#PHI:174#GNA1#5476#Candida_albicans#reduced_virulence	No definition line	60
MHUMG1_58941	3	2.08706e-20	G4MU34#PHI:3257#MoIlv1#318829#Magnaporthe_oryzae#reduced_virulence	No definition line	60
MHUMG1_21681	333	7.93486e-16	G4MW86#PHI:5594#FZC5#318829#Magnaporthe_oryzae#unaffected_pathogenicity	No definition line	60
MHUMG1_80741	17	2.84269e-14	Q0PND8#PHI:593#PEX6#318829#Magnaporthe_oryzae#loss_of_pathogenicity	No definition line	60
MHUMG1_73811	132	3.29196e-14	A0A024CHY4#PHI:4837#cipA#36746#Pseudomonas_cichorii#reduced_virulence	No definition line	60
MHUMG1_42621	18	1.53369e-12	D4III8#PHI:2227#pao#5270#Ustilago_maydis#reduced_virulence__loss_of_pathogenicity	No definition line	60
MHUMG1_86961	23	2.3334e-12	I1RQS2#PHI:1327#GzbZIP009#5518#Fusarium_graminearum#unaffected_pathogenicity	No definition line	60
MHUMG1_7491	16	7.8465e-10	Q4V006#PHI:3947#XC_0281#339#Xanthomonas_campestris#reduced_virulence	No definition line	60
MHUMG1_11771	7	2.32802e-08	I1S9T2#PHI:1623#GzJUM005#5518#Fusarium_graminearum#unaffected_pathogenicity	No definition line	60
MHUMG1_35541	18	5.12233e-07	L0BUT7#PHI:3870#AbDhn3#29001#Alternaria_brassicicola#unaffected_pathogenicity	No definition line	60
MHUMG1_9091	17	1.23012e-154	I1RZL0#PHI:1414#GzC2H081#5518#Fusarium_graminearum#unaffected_pathogenicity	No definition line	59.9576
MHUMG1_13031	11	1.599e-160	G4NCW8#PHI:2101#MGG_11454.5#318829#Magnaporthe_oryzae#unaffected_pathogenicity	No definition line	59.9567
MHUMG1_6631	3	4.75999e-180	A5HF03#PHI:1057#MTP1#318829#Magnaporthe_oryzae#unaffected_pathogenicity	No definition line	59.9548
MHUMG1_86521	4	1.96895e-150	A0A177DU44#PHI:8000#csn5#5599#Alternaria_alternata#reduced_virulence	No definition line	59.9407
MHUMG1_15911	3	0	I1RN15#PHI:1456#GzAra004#5518#Fusarium_graminearum#unaffected_pathogenicity	No definition line	59.9327
MHUMG1_11731	275	0	I1RVU7#PHI:1789#GzZC104#5518#Fusarium_graminearum#unaffected_pathogenicity	No definition line	59.8938
MHUMG1_26451	10	0	O13289#PHI:106__PHI:7209#CAT1__cat1#5476#Candida_albicans#reduced_virulence__unaffected_pathogenicity	No definition line	59.8753
MHUMG1_107791	12	8.20856e-65	I1RYE2#PHI:1459#GzAra007#5518#Fusarium_graminearum#unaffected_pathogenicity	No definition line	59.8726
MHUMG1_57661	6	9.11948e-46	I1S0G0#PHI:1617#GzssDB002#5518#Fusarium_graminearum#unaffected_pathogenicity	No definition line	59.8639
MHUMG1_86101	6	2.24672e-50	I1R9C6#PHI:8666#FgKP4L-1_(FGSG_00060)#5518#Fusarium_graminearum#reduced_virulence	No definition line	59.8291
MHUMG1_39141	5	1.11293e-125	Q4U4T0#PHI:2388#Chi2#5530#Metarhizium_anisopliae#increased_virulence_(hypervirulence)__reduced_virulence	No definition line	59.8071
MHUMG1_65371	17	1.84096e-83	I1RSH6#PHI:1510#GzHOME005#5518#Fusarium_graminearum#unaffected_pathogenicity	No definition line	59.7561
MHUMG1_56281	4	1.7731e-131	M7TSY2#PHI:7975#Nop53#40559#Botrytis_cinerea#reduced_virulence	No definition line	59.7222
MHUMG1_2461	14	1.03492e-106	I1RA01#PHI:1537#MYT1#5518#Fusarium_graminearum#unaffected_pathogenicity	No definition line	59.6721
MHUMG1_76131	9	1.79953e-97	Q5A5P7#PHI:4891#orf19.5352#5476#Candida_albicans#unaffected_pathogenicity	No definition line	59.6639
MHUMG1_41131	8	1.24117e-80	I1RWL9#PHI:1079#Pls1#5518#Fusarium_graminearum#unaffected_pathogenicity	No definition line	59.6413
MHUMG1_22181	57	9.36077e-145	I1RHP9#PHI:5795#Fgsg03310#5518#Fusarium_graminearum#unaffected_pathogenicity	No definition line	59.542
MHUMG1_84951	11	0	G4MV40#PHI:6395#MoALR2#318829#Magnaporthe_oryzae#reduced_virulence	No definition line	59.5161
MHUMG1_89071	5	7.5106e-101	G4MTK2#PHI:5232#MoARG1#318829#Magnaporthe_oryzae#loss_of_pathogenicity	No definition line	59.4937
MHUMG1_46561	68	2.24573e-152	I1RM58#PHI:5851#Fgsg05039#5518#Fusarium_graminearum#unaffected_pathogenicity	No definition line	59.4787
MHUMG1_27721	19	0	G4MQP9#PHI:2177#PAS1#318829#Magnaporthe_oryzae#unaffected_pathogenicity	No definition line	59.4766
MHUMG1_20061	7	1.65254e-39	Q9P470#PHI:257#GAS2#318829#Magnaporthe_oryzae#reduced_virulence	No definition line	59.3985
MHUMG1_24781	5	0	G4N704#PHI:7992#PoMuk1_(MGG_06476)__PoMuk1#318829#Magnaporthe_oryzae#unaffected_pathogenicity__loss_of_pathogenicity	No definition line	59.375
MHUMG1_68181	48	0	Q9C2Y4#PHI:405#PDE1#318829#Magnaporthe_oryzae#reduced_virulence	No definition line	59.375
MHUMG1_9861	5	6.29202e-113	E3Q2L6#PHI:6825#GPI12#31870#Colletotrichum_graminicola#loss_of_pathogenicity	No definition line	59.375
MHUMG1_49561	29	1.0464e-09	I1RHM1#PHI:1444#GzGATA002#5518#Fusarium_graminearum#unaffected_pathogenicity	No definition line	59.375
MHUMG1_56591	9	1.33828e-128	Q0UHM8#PHI:2257#Pbl1#13684#Parastagonospora_nodorum#unaffected_pathogenicity	No definition line	59.3373
MHUMG1_57911	11	2.84921e-57	P87199#PHI:465#KIN2#5270#Ustilago_maydis#reduced_virulence	No definition line	59.322
MHUMG1_29711	30	4.49474e-121	A5H456#PHI:867__PHI:1159#MgAtr7#1047171#Zymoseptoria_tritici#unaffected_pathogenicity__chemistry_target:_sensitivity_to_chemical	No definition line	59.2705
MHUMG1_42971	7	3.91361e-58	I1RX43#PHI:1495#MAT1-1-1#5518#Fusarium_graminearum#unaffected_pathogenicity	No definition line	59.2593
MHUMG1_75051	269	6.46746e-39	Q4I0C5#PHI:1764#GzZC079#5518#Fusarium_graminearum#unaffected_pathogenicity	No definition line	59.2593
MHUMG1_76911	47	5.75008e-22	I1RUC7#PHI:1260#FGSG_07816#5518#Fusarium_graminearum#unaffected_pathogenicity	No definition line	59.2593
MHUMG1_50241	19	7.65792e-08	B1GVX4#PHI:2289#BcBOA2#40559#Botrytis_cinerea#reduced_virulence	No definition line	59.2593
MHUMG1_72961	5	7.05481e-22	I1S3J7#PHI:1424#GzC2H092#5518#Fusarium_graminearum#unaffected_pathogenicity	No definition line	59.2105
MHUMG1_73511	20	9.03524e-159	G4MXR2#PHI:8753__PHI:8806#MoChia1_(MGG_08054)__MoChi1_(MGG_08054)#318829#Magnaporthe_oryzae#reduced_virulence	No definition line	59.1781
MHUMG1_88071	28	8.84505e-75	E9NYS9#PHI:495#PPOB#746128#Aspergillus_fumigatus#increased_virulence_(hypervirulence)	No definition line	59.1716
MHUMG1_101371	41	8.01897e-125	J4VU52#PHI:7380#Blys7#176275#Beauveria_bassiana#unaffected_pathogenicity	No definition line	59.1398
MHUMG1_45031	9	1.31934e-161	G4MUG1#PHI:8039__PHI:8046#Moaos1__Aos1#318829#Magnaporthe_oryzae#reduced_virulence	No definition line	59.1241
MHUMG1_46031	76	0	I1S2J9#PHI:3924__PHI:8224__PHI:9036#FgABC1__Fg10995__fgm5_(FGSG_10995)#5518#Fusarium_graminearum#reduced_virulence	No definition line	59.0909
MHUMG1_93031	164	6.70739e-97	I1RZD4#PHI:1413#GzC2H080#5518#Fusarium_graminearum#unaffected_pathogenicity	No definition line	59.0909
MHUMG1_61921	293	1.51371e-63	I1SAE7#PHI:1725#GzZC040#5518#Fusarium_graminearum#unaffected_pathogenicity	No definition line	59.0909
MHUMG1_104821	297	5.76549e-45	I1RBN6#PHI:1799#GzZC114#5518#Fusarium_graminearum#unaffected_pathogenicity	No definition line	59.0909
MHUMG1_110901	56	2.31844e-31	I1RI73#PHI:1284#FGSG_03499#5518#Fusarium_graminearum#unaffected_pathogenicity	No definition line	59.0909
MHUMG1_51851	21	1.66654e-18	B1GVX4#PHI:2289#BcBOA2#40559#Botrytis_cinerea#reduced_virulence	No definition line	59.0909
MHUMG1_86141	250	4.8391e-17	G4NKX6#PHI:5649#FZC52#318829#Magnaporthe_oryzae#unaffected_pathogenicity	No definition line	59.0909
MHUMG1_94071	177	1.48748e-09	I1RXS2#PHI:1759#GzZC074#5518#Fusarium_graminearum#unaffected_pathogenicity	No definition line	59.0909
MHUMG1_92511	251	3.25507e-09	I1RQS1#PHI:1262#FGSG_06420#5518#Fusarium_graminearum#unaffected_pathogenicity	No definition line	59.0909
MHUMG1_76021	258	1.47658e-07	G4N8I4#PHI:2989__PHI:5680#MGG_06243.6__FZC76#318829#Magnaporthe_oryzae#reduced_virulence__unaffected_pathogenicity	No definition line	59.0909
MHUMG1_70941	18	0	G4MZD0#PHI:3060__PHI:4054#Molrg1__Lrg1#318829#Magnaporthe_oryzae#loss_of_pathogenicity	No definition line	59.0669
MHUMG1_51641	94	0	Q9Y8A2#PHI:255#FUM1_(FUM5)#5127#Fusarium_fujikuroi#unaffected_pathogenicity	No definition line	59.0062
MHUMG1_78571	11	0	I1S9V9#PHI:1655#GzWing028#5518#Fusarium_graminearum#unaffected_pathogenicity	No definition line	59.0042
MHUMG1_11981	19	0	G4MRZ0#PHI:773__PHI:791__PHI:2141#MGG_11899__CDC15#318829#Magnaporthe_oryzae#reduced_virulence__loss_of_pathogenicity	No definition line	58.9844
MHUMG1_70271	5	1.28081e-112	G4MSF9#PHI:8754#MoPer1_(MGG_04527)#318829#Magnaporthe_oryzae#reduced_virulence	No definition line	58.9844
MHUMG1_25511	4	2.76569e-113	I1RK21#PHI:1559#GzNEG001#5518#Fusarium_graminearum#unaffected_pathogenicity	No definition line	58.9641
MHUMG1_24441	10	0	I1RSV8#PHI:1519#GzHOMEL018#5518#Fusarium_graminearum#unaffected_pathogenicity	No definition line	58.9381
MHUMG1_20951	20	8.91671e-123	Q6QIY0#PHI:2382#Upa2#5270#Ustilago_maydis#unaffected_pathogenicity	No definition line	58.9091
MHUMG1_55591	12	0	Q4WNQ3#PHI:8876#gefB_(Afu4g06570)#746128#Aspergillus_fumigatus#unaffected_pathogenicity__loss_of_pathogenicity	No definition line	58.8889
MHUMG1_15201	5	8.77395e-146	G4MZ21#PHI:8649#Poalkb1_(MGG_01363)#318829#Magnaporthe_oryzae#reduced_virulence	No definition line	58.871
MHUMG1_87261	8	0	T2C913#PHI:3225#Ndo1#36651#Penicillium_digitatum#unaffected_pathogenicity	No definition line	58.867
MHUMG1_38981	14	2.12248e-51	I1RBL8#PHI:1631#GzWing003#5518#Fusarium_graminearum#unaffected_pathogenicity	No definition line	58.8652
MHUMG1_98961	10	0	J9VUY6#PHI:6871#gua1#5207#Cryptococcus_neoformans#loss_of_pathogenicity	No definition line	58.8235
MHUMG1_271	40	6.89256e-129	G2XIG8#PHI:7173#HiC-15#27337#Verticillium_dahliae#reduced_virulence	No definition line	58.8235
MHUMG1_72611	3	1.32292e-48	C5P3X6#PHI:479#MEP1#199306#Coccidioides_posadasii#reduced_virulence	No definition line	58.8235
MHUMG1_36211	189	9.84466e-42	G4MVR0#PHI:5623#FZC29#318829#Magnaporthe_oryzae#unaffected_pathogenicity	No definition line	58.8235
MHUMG1_23831	229	5.08078e-32	I1RPF6#PHI:1878#GzZC193#5518#Fusarium_graminearum#unaffected_pathogenicity	No definition line	58.8235
MHUMG1_39601	13	2.00337e-22	I1RQC1#PHI:1310#GzbHLH011#5518#Fusarium_graminearum#unaffected_pathogenicity	No definition line	58.8235
MHUMG1_102701	34	1.34165e-20	I1RC95#PHI:1566#GzOB006#5518#Fusarium_graminearum#lethal	No definition line	58.8235
MHUMG1_3621	13	2.09837e-19	I1REI8#PHI:1093#FGSG_02077#5518#Fusarium_graminearum#reduced_virulence	No definition line	58.8235
MHUMG1_77961	14	7.15537e-14	Q5A4W8#PHI:7195#Bdf1#5476#Candida_albicans#reduced_virulence	No definition line	58.8235
MHUMG1_6721	7	1.18903e-10	Q5AH74#PHI:2563#DPP3#5476#Candida_albicans#reduced_virulence	No definition line	58.8235
MHUMG1_61751	4	3.73693e-10	I1RFQ3#PHI:1543#GzMyb007#5518#Fusarium_graminearum#unaffected_pathogenicity	No definition line	58.8235
MHUMG1_42251	31	4.58746e-10	Q0UDE7#PHI:2247#Sch1#13684#Parastagonospora_nodorum#unaffected_pathogenicity	No definition line	58.8235
MHUMG1_42541	6	2.31808e-07	Q4WNM3#PHI:2552#NOP4#746128#Aspergillus_fumigatus#lethal	No definition line	58.8235
MHUMG1_65001	221	4.49403e-56	J4KMX0#PHI:7152#pmcB#176275#Beauveria_bassiana#reduced_virulence	No definition line	58.7379
MHUMG1_40251	11	0	A0A095EN78#PHI:4555#URE1#552467#Cryptococcus_gattii_vgiii#reduced_virulence	No definition line	58.7007
MHUMG1_73751	8	1.79907e-11	Q4WUL6#PHI:362__PHI:2520#LYSF__LYS4#746128#Aspergillus_fumigatus#loss_of_pathogenicity__lethal	No definition line	58.6957
MHUMG1_67721	17	0	I1RAL4#PHI:1300#GzbHLH001#5518#Fusarium_graminearum#unaffected_pathogenicity	No definition line	58.6207
MHUMG1_46751	8	1.21588e-64	J9N257#PHI:2284__PHI:3438#Msb2#5507#Fusarium_oxysporum#reduced_virulence__loss_of_pathogenicity__unaffected_pathogenicity	No definition line	58.6207
MHUMG1_81171	297	3.1122e-53	I1S1N1#PHI:1788#GzZC103#5518#Fusarium_graminearum#unaffected_pathogenicity	No definition line	58.6207
MHUMG1_79811	18	3.73153e-37	A3RH09#PHI:3865#GOX2#27334#Penicillium_expansum#reduced_virulence	No definition line	58.6207
MHUMG1_76671	263	2.74744e-14	I1RER7#PHI:1930#GzZC245#5518#Fusarium_graminearum#unaffected_pathogenicity	No definition line	58.6207
MHUMG1_98741	13	4.39803e-06	Q01446#PHI:112#MAK1#140110#Nectria_haematococca#reduced_virulence	No definition line	58.6207
MHUMG1_20401	24	2.1836e-177	Q59RG0#PHI:511#CaNAG4#5476#Candida_albicans#reduced_virulence	No definition line	58.6134
MHUMG1_109851	23	0	Q9P8L8#PHI:544#BCMFS1#40559#Botrytis_cinerea#unaffected_pathogenicity	No definition line	58.6022
MHUMG1_8311	4	0	Q4WXC5#PHI:2531#PRI1#746128#Aspergillus_fumigatus#lethal	No definition line	58.5878
MHUMG1_69581	5	0	Q4WJR9#PHI:6554#sB#746128#Aspergillus_fumigatus#unaffected_pathogenicity	No definition line	58.5714
MHUMG1_31181	270	0	E3QPY3#PHI:4217#NPS6#31870#Colletotrichum_graminicola#reduced_virulence	No definition line	58.5673
MHUMG1_35271	254	0	I1RP25#PHI:1225#FGSG_05775#5518#Fusarium_graminearum#lethal	No definition line	58.5366
MHUMG1_18891	16	3.39928e-08	D4III8#PHI:2227#pao#5270#Ustilago_maydis#reduced_virulence__loss_of_pathogenicity	No definition line	58.5366
MHUMG1_22681	21	4.53494e-129	L2FHG9#PHI:3972#CDA#474922#Colletotrichum_gloeosporioides#unaffected_pathogenicity	No definition line	58.5284
MHUMG1_70281	19	2.76176e-147	I1RC37#PHI:1302#GzbHLH003#5518#Fusarium_graminearum#unaffected_pathogenicity	No definition line	58.5253
MHUMG1_14341	5	4.12275e-93	J4KNV2#PHI:6644#CIA30#176275#Beauveria_bassiana#increased_virulence_(hypervirulence)	No definition line	58.5153
[truncated: 815 more rows]

## Sheet: ManiBRIP53293
Query	Number of HSPs	Lowest E-value	Accession (E-value)	Description (E-value)	Greatest identity %
[truncated: 1,970 more rows]
